# Supplementary material for: Carcass Persistence and Detectability: Reducing the Uncertainty Surrounding Wildlife-Vehicle Collision Surveys
Source: PLoS One. 2016 Nov 2;11(11):e0165608. doi: 10.1371/journal.pone.0165608 (PMC5091900; doi:10.1371/journal.pone.0165608)
Supplement: S1 Dataset — (XLSX) [file pone.0165608.s002.xlsx]

## Sheet: Persistence - Buffer_2km
ID	survey	year	month	season_name	season_cod	data	wild_domestic	functional_group	class	order	family	species	common_name	body_mass_g	site	position	position_cod	hour_of_first_record	x	y	utm_zone	datum	hour_of_last_record	removal_time_hours	status_name	status	n_days	rainy	max_temperature	min_temperature	mean_temperature	humidity	traffic	road_type	road_type_cod	road	water	others	savannah	reforestation	forest	anthropic_vegetation	urban	agriculture	grasslands_pasture
1	1	2013	march	summer	2	11_03_2013	wild	small_reptiles	Reptile	Squamata	Amphisbaenidae	Amphisbaena_alba	Cobra_de_duas_cabeças	25	ESECAE	shoulder	2	08:10:00	217565	8273890	23L	sirgass_2000	08:12:00	1	removed	1	0	0.2	28.8	19.5	23.62	75.75	5000	four_lane	3	BR_010_BR_020_BR_030	0	0.107143	0.560065	0	0.0511364	0	0.150974	0.0771104	0.0219156
2	1	2013	march	summer	2	11_03_2013	wild	small_reptiles	Reptile	Squamata	Amphisbaenidae	Amphisbaena_alba	Cobra_de_duas_cabeças	25	ESECAE	shoulder	2	08:22:00	220298	8273950	23L	sirgass_2000	08:35:00	24	removed	1	1	0.2	28.8	19.5	23.62	75.75	5000	four_lane	3	BR_010_BR_020_BR_030	0	0.0292208	0.486201	0	0.0397727	0	0	0.412338	0
3	1	2013	march	summer	2	11_03_2013	wild	small_birds	Birds	Passeriformes	NA	NA	Passeriforme	25	ESECAE	shoulder	2	09:08:00	217702	8280504	23L	sirgass_2000	09:29:00	48	removed	1	2	0.2	28.8	19.5	23.62	75.75	2600	two_lane	2	DF_128	0	0.112369	0.460792	0	0.0315279	0.0323363	0	0.336297	0
4	1	2013	march	summer	2	11_03_2013	wild	small_birds	Birds	Passeriformes	Emberizidae	Volatinia_jacarina	Tiziu	10	ESECAE	shoulder	2	09:31:00	228461	8282509	23L	sirgass_2000	09:50:00	1	removed	1	0	0.2	28.8	19.5	23.62	75.75	951	two_lane	2	BR_010_DF_345	0	0.0153597	0.20291	0	0.0137429	0	0	0.732417	0
5	1	2013	march	summer	2	11_03_2013	wild	Large_mammals	Mammals	Carnivora	Canidae	Cerdocyon_thous	Cachorro_do_mato	5700	ESECAE	lane	1	09:42:00	224383	8276059	23L	sirgass_2000	10:05:00	1	removed	1	0	0.2	28.8	19.5	23.62	75.75	951	two_lane	2	BR_010_DF_345	0	0.0249597	0.538647	0	0.00483092	0.000805153	0	0.381643	0
6	1	2013	march	summer	2	11_03_2013	wild	small_birds	Birds	Passeriformes	Emberizidae	Volatinia_jacarina	Tiziu	10	ESECAE	shoulder	2	10:15:00	191092	8265516	23L	sirgass_2000	10:42:00	1	removed	1	0	0.2	28.8	19.5	23.62	75.75	775	two_lane	2	DF_001	0.00161551	0.0258481	0.680129	0	0.0557351	0.191438	0.0177706	0.0153473	0
7	1	2013	march	summer	2	12_03_2013	wild	large_birds	Birds	Charadriiformes	Charadriidae	Vanellus_chilensis	Quero_quero	300	ESECAE	shoulder	2	08:17:00	218933	8273755	23L	sirgass_2000	07:53:00	72	removed	1	3	1.1	30.4	19	24.56	67.5	5000	four_lane	3	BR_010_BR_020_BR_030	0	0.0410628	0.647343	0	0.047504	0	0.0241546	0.207729	0
8	1	2013	march	summer	2	12_03_2013	wild	small_birds	Birds	Passeriformes	Emberizidae	Volatinia_jacarina	Tiziu	10	ESECAE	shoulder	2	08:33:00	223553	8275016	23L	sirgass_2000	08:25:00	72	removed	1	3	1.1	30.4	19	24.56	67.5	5000	four_lane	3	BR_010_BR_020_BR_030	0	0.0226537	0.459547	0	0.00161812	0.000809061	0	0.46521	0
9	1	2013	march	summer	2	12_03_2013	wild	small_birds	Birds	Passeriformes	Emberizidae	Volatinia_jacarina	Tiziu	10	ESECAE	lane	1	09:55:00	228045	8281110	23L	sirgass_2000	09:55:00	1	removed	1	0	1.1	30.4	19	24.56	67.5	951	two_lane	2	BR_010_DF_345	0	0.0170732	0.372358	0	0.00569106	0	0	0.560163	0
10	1	2013	march	summer	2	12_03_2013	wild	small_birds	Birds	Passeriformes	Emberizidae	Volatinia_jacarina	Tiziu	10	PNB	lane	1	10:33:00	192490	8264315	23L	sirgass_2000	11:04:00	1	removed	1	0	1.1	30.4	19	24.56	67.5	775	two_lane	2	DF_001	0	0.143088	0.384802	0	0.043654	0.194826	0.0679062	0.0792239	0.047696
11	1	2013	march	summer	2	12_03_2013	wild	small_birds	Birds	Passeriformes	NA	NA	Passeriforme	25	PNB	lane	1	10:55:00	184506	8270385	23L	sirgass_2000	11:00:00	72	removed	1	3	1.1	30.4	19	24.56	67.5	775	two_lane	2	DF_001	0	0.00241935	0.379839	0	0.0854839	0.0258065	0	0.492742	0
12	1	2013	march	summer	2	12_03_2013	wild	small_reptiles	Reptile	Squamata	Dipsadidae	Philodryas_sp	Cobra_cipo	150	PNB	lane	1	10:57:00	184515	8270378	23L	sirgass_2000	11:20:00	1	removed	1	0	1.1	30.4	19	24.56	67.5	775	two_lane	2	DF_001	0	0.00241352	0.378117	0	0.0852776	0.0257442	0	0.494771	0
13	1	2013	march	summer	2	12_03_2013	wild	small_birds	Birds	Passeriformes	Emberizidae	Volatinia_jacarina	Tiziu	10	PNB	lane	1	11:23:00	183110	8271409	23L	sirgass_2000	11:00:00	24	removed	1	1	1.1	30.4	19	24.56	67.5	775	two_lane	2	DF_001	0	0.00483871	0.377419	0	0.112903	0.0145161	0	0.476613	0
14	1	2013	march	summer	2	12_03_2013	wild	small_birds	Birds	Passeriformes	Emberizidae	Volatinia_jacarina	Tiziu	10	PNB	lane	1	11:32:00	179366	8274255	23L	sirgass_2000	11:57:00	1	removed	1	0	1.1	30.4	19	24.56	67.5	775	two_lane	2	DF_001	0	0.0767367	0.439418	0	0.0533118	0.00726979	0	0.409532	0
15	1	2013	march	summer	2	12_03_2013	domestic	medium_mammals	Mammals	Carnivora	Felidae	Felis_catus	Gato_Domestico	5000	PNB	lane	1	12:04:00	169619	8258405	23L	sirgass_2000	12:37:00	1	removed	1	0	1.1	30.4	19	24.56	67.5	775	two_lane	2	DF_001	0	0.0307942	0.204214	0.3047	0.106159	0.106969	0	0.17342	0.0526742
16	1	2013	march	summer	2	12_03_2013	wild	small_birds	Birds	Passeriformes	Emberizidae	Volatinia_jacarina	Tiziu	10	PNB	shoulder	2	12:08:00	170314	8257923	23L	sirgass_2000	11:57:00	24	removed	1	1	1.1	30.4	19	24.56	67.5	8000	two_lane	2	BR_080	0	0.0346216	0.244767	0.359903	0.127214	0.134461	0	0.0780998	0.000805153
17	1	2013	march	summer	2	12_03_2013	wild	small_mammals	Mammals	Chiroptera	Mormoopidae	Pteronotus_sp	Morcego	20	PNB	shoulder	2	12:15:00	173081	8256646	23L	sirgass_2000	12:53:00	1	removed	1	0	1.1	30.4	19	24.56	67.5	8000	two_lane	2	DF_001	0	0.0386473	0.533011	0.111916	0.041868	0.165862	0	0.0933977	0
18	1	2013	march	summer	2	12_03_2013	wild	small_birds	Birds	Passeriformes	Emberizidae	Volatinia_jacarina	Tiziu	10	PNB	shoulder	2	12:18:00	173132	8256558	23L	sirgass_2000	10:35:00	48	removed	1	2	1.1	30.4	19	24.56	67.5	8000	two_lane	2	DF_001	0	0.0386163	0.525342	0.111022	0.0410298	0.159292	0	0.109413	0
19	1	2013	march	summer	2	12_03_2013	wild	small_birds	Birds	Cuculiforme	Cuculidae	Crotophaga_ani	Anu_preto	100	PNB	shoulder	2	12:25:00	173706	8254708	23L	sirgass_2000	13:08:00	1	removed	1	0	1.1	30.4	19	24.56	67.5	8000	two_lane	2	DF_001	0	0.0726392	0.25908	0.129944	0.0306699	0.0653753	0	0.426957	0
20	1	2013	march	summer	2	13_03_2013	wild	small_reptiles	Reptile	Squamata	Amphisbaenidae	Amphisbaena_alba	Cobra_de_duas_cabeças	25	ESECAE	lane	1	08:08:00	215811	8274026	23L	sirgass_2000	07:53:00	1	removed	1	0	0	30.5	19.3	23.2	80.75	5000	four_lane	3	BR_010_BR_020_BR_030	0	0.229654	0.365028	0	0.0797744	0	0.232877	0.00805802	0.0523771
21	1	2013	march	summer	2	13_03_2013	wild	small_reptiles	Reptile	Squamata	Dipsadidae	Sibynomorphus_mikanii	Jararaquinha_dormideira	150	ESECAE	shoulder	2	08:42:00	223036	8274819	23L	sirgass_2000	08:38:00	48	removed	1	2	0	30.5	19.3	23.2	80.75	5000	four_lane	3	BR_010_BR_020_BR_030	0	0.0170455	0.479708	0	0	0.000811688	0	0.455357	0
22	1	2013	march	summer	2	13_03_2013	wild	small_birds	Birds	Passeriformes	Emberizidae	Volatinia_jacarina	Tiziu	10	ESECAE	shoulder	2	09:10:00	221894	8274495	23L	sirgass_2000	08:50:00	48	removed	1	2	0	30.5	19.3	23.2	80.75	5000	four_lane	3	BR_010_BR_020_BR_030	0	0.00647249	0.477346	0	0.00323625	0	0	0.480583	0
23	1	2013	march	summer	2	13_03_2013	wild	small_reptiles	Reptile	Squamata	Dipsadidae	Oxyrhopus_guibei	Coral_falsa	80	ESECAE	shoulder	2	08:25:00	218936	8273808	23L	sirgass_2000	08:50:00	1	removed	1	0	0	30.5	19.3	23.2	80.75	5000	four_lane	3	BR_010_BR_020_BR_030	0	0.0404531	0.651294	0	0.0477346	0	0.0218447	0.206311	0
24	1	2013	march	summer	2	13_03_2013	wild	small_reptiles	Reptile	Squamata	Amphisbaenidae	Amphisbaena_alba	Cobra_de_duas_cabeças	25	ESECAE	shoulder	2	09:28:00	217954	8273888	23L	sirgass_2000	08:54:00	1	removed	1	0	0	30.5	19.3	23.2	80.75	5000	four_lane	3	BR_010_BR_020_BR_030	0	0.0987055	0.604369	0	0.0550162	0	0.100324	0.110032	0
25	1	2013	march	summer	2	13_03_2013	wild	small_birds	Birds	Passeriformes	Emberizidae	Volatinia_jacarina	Tiziu	10	ESECAE	lane	1	10:35:00	224254	8275879	23L	sirgass_2000	10:04:00	1	removed	1	0	0	30.5	19.3	23.2	80.75	951	two_lane	2	BR_010_DF_345	0	0.0242718	0.52589	0	0.00485437	0.000809061	0	0.39644	0
26	1	2013	march	summer	2	13_03_2013	wild	small_birds	Birds	Passeriformes	Emberizidae	Volatinia_jacarina	Tiziu	10	PNB	lane	1	12:03:00	177439	8275461	23L	sirgass_2000	10:04:00	24	removed	1	1	0	30.5	19.3	23.2	80.75	775	two_lane	2	DF_001	0	0.0613398	0.285714	0	0.00322841	0.00968523	0	0.56255	0.0589185
27	1	2013	march	summer	2	13_03_2013	domestic	Large_mammals	Mammals	Carnivora	Canidae	Canis_familiaris	Cachorro_Domestico	10000	PNB	shoulder	2	12:43:00	170180	8257965	23L	sirgass_2000	12:23:00	48	removed	1	2	0	30.5	19.3	23.2	80.75	8000	two_lane	2	BR_080	0	0.0314516	0.229032	0.370161	0.125806	0.125	0	0.0935484	0.00483871
28	1	2013	march	summer	2	13_03_2013	wild	small_reptiles	Reptile	Squamata	Amphisbaenidae	Amphisbaena_alba	Cobra_de_duas_cabeças	25	FAL	shoulder	2	14:02:00	182117	8231571	23L	sirgass_2000	13:48:00	48	removed	1	2	0	30.5	19.3	23.2	80.75	2000	two_lane	2	BR_251	0.00161681	0.0355699	0.625707	0	0.0808407	0.0598222	0.0250606	0.12692	0
29	1	2013	march	summer	2	13_03_2013	wild	medium_mammals	Mammals	Carnivora	Mustelidae	Galictis_cuja	Furao	1600	FAL	shoulder	2	14:08:00	182925	8231334	23L	sirgass_2000	11:56:00	24	removed	1	1	0	30.5	19.3	23.2	80.75	2000	two_lane	2	BR_251	0.00162075	0.034846	0.63128	0	0.0737439	0.0640194	0.0251216	0.126418	0
30	1	2013	march	summer	2	13_03_2013	domestic	large_birds	Ave	Galliforme	Phasianidae	Gallus_gallus_domesticus	Galinha	1500	FAL	shoulder	2	14:14:00	183872	8231002	23L	sirgass_2000	13:36:00	48	removed	1	2	0	30.5	19.3	23.2	80.75	2000	two_lane	2	BR_251	0.00161551	0.0242326	0.706785	0	0.100969	0.0331179	0	0.095315	0
31	2	2013	april	autumn	3	15_04_2013	wild	small_mammals	Mammals	Didelphimorphia	Didelphidae	Didelphis_albiventris	Gamba_ou_Sarue_	900	JBB	shoulder	2	08:23:00	198049	8240766	23L	sirgass_2000	08:09:00	1	removed	1	0	1	27	18.2	21.74	83.25	7000	four_lane	3	DF_001	0	0.122878	0.419563	0	0.00404204	0.0161681	0.155214	0.251415	0
32	2	2013	april	autumn	3	15_04_2013	wild	large_birds	Birds	Falconiforme	Falconidae	NA	Gaviao_	300	PNB	lane	1	09:56:00	171987	8257566	23L	sirgass_2000	09:52:00	1	removed	1	0	1	27	18.2	21.74	83.25	8000	two_lane	2	DF_001	0	0.0266344	0.493947	0.154157	0.071025	0.241324	0	0.000807103	0
33	2	2013	april	autumn	3	15_04_2013	wild	small_reptiles	Reptile	Squamata	Dipsadidae	Oxyrhopus_sp	Coral_falsa	80	PNB	shoulder	2	10:32:00	177526	8275459	23L	sirgass_2000	10:03:00	24	removed	1	1	1	27	18.2	21.74	83.25	775	two_lane	2	DF_001	0	0.0598222	0.288601	0	0.00323363	0.00970089	0	0.569119	0.0509297
34	2	2013	april	autumn	3	15_04_2013	domestic	Large_mammals	Mammals	Carnivora	Canidae	Canis_familiaris	Cachorro_Domestico	10000	PNB	lane	1	10:36:00	179826	8273893	23L	sirgass_2000	00:00:00	96	remained	0	4	1	27	18.2	21.74	83.25	775	two_lane	2	DF_001	0	0.105093	0.430073	0	0.0622474	0.0113177	0	0.376718	0
35	2	2013	april	autumn	3	15_04_2013	wild	small_birds	Birds	Columbiforme	Columbidae	Columbina_talpacoti	Rolinha	47	PNB	shoulder	2	11:09:00	192825	8264015	23L	sirgass_2000	10:56:00	1	removed	1	0	1	27	18.2	21.74	83.25	775	two_lane	2	DF_001	0.000807103	0.188055	0.322034	0	0.0484262	0.16707	0.106538	0.0686037	0.0524617
36	2	2013	april	autumn	3	15_04_2013	wild	small_reptiles	Reptile	Squamata	NA	NA	Lagarto	22	ESECAE	lane	1	11:35:00	218491	8273811	23L	sirgass_2000	11:28:00	1	removed	1	0	1	27	18.2	21.74	83.25	5000	four_lane	3	BR_010_BR_020_BR_030	0	0.0630558	0.647534	0	0.0501213	0	0.0452708	0.160873	0
37	2	2013	april	autumn	3	15_04_2013	wild	small_birds	Birds	Cuculiforme	Cuculidae	Guira_guira	Anu_branco	100	ESECAE	lane	1	11:48:00	224133	8275265	23L	sirgass_2000	11:44:00	1	removed	1	0	1	27	18.2	21.74	83.25	5000	four_lane	3	BR_010_BR_020_BR_030	0	0.0233307	0.415929	0	0.00884956	0.000804505	0	0.502011	0
38	2	2013	april	autumn	3	15_04_2013	wild	small_reptiles	Reptile	Squamata	Amphisbaenidae	AmphisbaeNA_alba	Cobra_de_duas_cabeças	25	ESECAE	shoulder	2	12:00:00	218431	8273850	23L	sirgass_2000	00:00:00	48	removed	1	2	1	27	18.2	21.74	83.25	5000	four_lane	3	BR_010_BR_020_BR_030	0	0.066129	0.647581	0	0.0516129	0	0.0467742	0.154839	0
39	2	2013	april	autumn	3	15_04_2013	wild	small_birds	Birds	Passeriformes	Emberizidae	Volatinia_jacariNA	Tiziu	10	ESECAE	lane	1	12:11:00	212564	8275086	23L	sirgass_2000	12:00:00	24	removed	1	1	1	27	18.2	21.74	83.25	2600	two_lane	2	DF_128	0.118027	0.30962	0.265966	0	0.0444624	0	0.047696	0.14228	0.0355699
40	2	2013	april	autumn	3	15_04_2013	wild	small_birds	Birds	Passeriformes	Emberizidae	Volatinia_jacariNA	Tiziu	10	ESECAE	lane	1	12:39:00	226814	8282571	23L	sirgass_2000	12:46:00	1	removed	1	0	1	27	18.2	21.74	83.25	33	dirt_road	1	DF_205	0	0.0194018	0.417138	0	0.0161681	0	0	0.524656	0
41	2	2013	april	autumn	3	16_04_2013	wild	small_birds	Birds	Passeriformes	Emberizidae	Volatinia_jacariNA	Tiziu	10	FAL	lane	1	08:32:00	187868	8231321	23L	sirgass_2000	08:21:00	1	removed	1	0	0	26.5	19	21.38	84	2000	two_lane	2	BR_251	0	0.0388036	0.942603	0	0.00242522	0.00485044	0	0	0
42	2	2013	april	autumn	3	16_04_2013	wild	Large_reptiles	Reptile	Squamata	Boidae	Epicrates_cenchria	Jiboia_arco_iris	3000	FAL	shoulder	2	08:38:00	184340	8230850	23L	sirgass_2000	08:40:00	24	removed	1	1	0	26.5	19	21.38	84	2000	two_lane	2	BR_251	0.000805802	0.0225624	0.757454	0	0.10556	0.0233683	0	0.0644641	0
43	2	2013	april	autumn	3	16_04_2013	wild	Large_reptiles	Reptile	Squamata	Viperidae	Bothrops_sp.	Jararaca	250	FAL	lane	1	08:48:00	181954	8231600	23L	sirgass_2000	08:36:00	1	removed	1	0	0	26.5	19	21.38	84	2000	two_lane	2	BR_251	0.00161421	0.0363196	0.617433	0	0.08636	0.0613398	0.0250202	0.126715	0
44	2	2013	april	autumn	3	16_04_2013	wild	small_reptiles	Reptile	Squamata	Dipsadidae	Oxyrhopus_guibei	Coral_falsa	80	PNB	shoulder	2	09:56:00	170597	8257843	23L	sirgass_2000	09:54:00	24	removed	1	1	0	26.5	19	21.38	84	8000	two_lane	2	DF_001	0	0.0365854	0.271545	0.336585	0.13252	0.157724	0	0.0479675	0
45	2	2013	april	autumn	3	16_04_2013	wild	small_birds	Birds	Passeriformes	NA	NA	Passeriforme	25	ESECAE	lane	1	11:28:00	216883	8273942	23L	sirgass_2000	11:17:00	1	removed	1	0	0	26.5	19	21.38	84	5000	four_lane	3	BR_010_BR_020_BR_030	0	0.131134	0.502816	0	0.0579244	0	0.215607	0.0217216	0.0386163
46	2	2013	april	autumn	3	16_04_2013	wild	small_reptiles	Reptile	Squamata	Amphisbaenidae	AmphisbaeNA_alba	Cobra_de_duas_cabeças	25	ESECAE	shoulder	2	11:30:00	218775	8273769	23L	sirgass_2000	00:00:00	72	removed	1	3	0	26.5	19	21.38	84	5000	four_lane	3	BR_010_BR_020_BR_030	0	0.047696	0.651576	0	0.0485044	0	0.0299111	0.189976	0
47	2	2013	april	autumn	3	16_04_2013	wild	small_reptiles	Reptile	Squamata	Amphisbaenidae	AmphisbaeNA_alba	Cobra_de_duas_cabeças	25	ESECAE	shoulder	2	11:35:00	219828	8273799	23L	sirgass_2000	11:24:00	1	removed	1	0	0	26.5	19	21.38	84	5000	four_lane	3	BR_010_BR_020_BR_030	0	0.0357143	0.546266	0	0.0430195	0	0	0.342532	0
48	2	2013	april	autumn	3	16_04_2013	wild	small_birds	Birds	Passeriformes	Mimidae	Mimus_saturninus	Sabia_do_campo	73	ESECAE	shoulder	2	11:46:00	223942	8275136	23L	sirgass_2000	11:33:00	1	removed	1	0	0	26.5	19	21.38	84	5000	four_lane	3	BR_010_BR_020_BR_030	0	0.021827	0.42118	0	0.00646726	0.000808407	0	0.499596	0
49	2	2013	april	autumn	3	16_04_2013	wild	small_reptiles	Reptile	Squamata	Amphisbaenidae	AmphisbaeNA_alba	Cobra_de_duas_cabeças	25	ESECAE	shoulder	2	11:57:00	218400	8273853	23L	sirgass_2000	09:50:00	48	removed	1	2	0	26.5	19	21.38	84	5000	four_lane	3	BR_010_BR_020_BR_030	0	0.0680713	0.644246	0	0.0518639	0	0.0502431	0.15235	0
50	2	2013	april	autumn	3	16_04_2013	wild	Large_reptiles	Reptile	Squamata	Viperidae	Crotalus_durissus	Cascavel	550	ESECAE	shoulder	2	12:04:00	217064	8273957	23L	sirgass_2000	00:00:00	72	removed	1	3	0	26.5	19	21.38	84	5000	four_lane	3	BR_010_BR_020_BR_030	0	0.124495	0.522231	0	0.0557801	0	0.195635	0.0315279	0.0388036
51	2	2013	april	autumn	3	16_04_2013	wild	large_birds	Birds	Strigiforme	Strigidae	Megascops_choliba	Corujinha_do_Mato	160	ESECAE	shoulder	2	12:05:00	212576	8275129	23L	sirgass_2000	00:00:00	72	removed	1	3	0	26.5	19	21.38	84	2600	two_lane	2	DF_128	0.120648	0.308502	0.268826	0	0.042915	0	0.0412955	0.146559	0.0356275
52	2	2013	april	autumn	3	16_04_2013	wild	small_birds	Birds	Passeriformes	Emberizidae	Volatinia_jacariNA	Tiziu	10	ESECAE	shoulder	2	12:19:00	212685	8275333	23L	sirgass_2000	12:01:00	1	removed	1	0	0	26.5	19	21.38	84	2600	two_lane	2	DF_128	0.10778	0.300648	0.286062	0	0.0380875	0	0.0178282	0.182334	0.0364668
53	2	2013	april	autumn	3	16_04_2013	wild	small_reptiles	Reptile	Squamata	Dipsadidae	Erythrolamprus_aesculapii	Coral_falsa	80	ESECAE	lane	1	12:50:00	228453	8282584	23L	sirgass_2000	00:00:00	72	removed	1	3	0	26.5	19	21.38	84	951	two_lane	2	BR_010_DF_345	0	0.0153473	0.1979	0	0.0137318	0	0	0.73748	0
54	2	2013	april	autumn	3	17_04_2013	wild	small_reptiles	Reptile	Squamata	Dipsadidae	Philodryas_sp	Cobra_cipo	150	JBB	lane	1	07:56:00	198094	8240377	23L	sirgass_2000	08:01:00	1	removed	1	0	7.3	26.5	16.2	20.32	74.25	7000	four_lane	3	DF_001	0	0.149194	0.447581	0	0.00241935	0.00806452	0.102419	0.259677	0
55	2	2013	april	autumn	3	17_04_2013	wild	small_birds	Birds	Passeriformes	Emberizidae	Volatinia_jacariNA	Tiziu	10	JBB	lane	1	07:59:00	198049	8240766	23L	sirgass_2000	08:06:00	1	removed	1	0	7.3	26.5	16.2	20.32	74.25	7000	four_lane	3	DF_001	0	0.122878	0.419563	0	0.00404204	0.0161681	0.155214	0.251415	0
56	2	2013	april	autumn	3	17_04_2013	wild	small_birds	Birds	Passeriformes	Emberizidae	Zonotrichia_capensis	Tico_tico	16	JBB	lane	1	08:30:00	185386	8230620	23L	sirgass_2000	08:38:00	1	removed	1	0	7.3	26.5	16.2	20.32	74.25	2000	two_lane	2	BR_251	0	0.0234818	0.907692	0	0.0412955	0.0137652	0	0	0
57	2	2013	april	autumn	3	17_04_2013	wild	small_reptiles	Reptile	Squamata	Amphisbaenidae	AmphisbaeNA_alba	Cobra_de_duas_cabeças	25	PNB	lane	1	09:25:00	173413	8255935	23L	sirgass_2000	09:47:00	1	removed	1	0	7.3	26.5	16.2	20.32	74.25	8000	two_lane	2	DF_001	0	0.0364372	0.438057	0.121457	0.0356275	0.125506	0	0.22753	0
58	2	2013	april	autumn	3	17_04_2013	wild	small_birds	Birds	Cuculiforme	Cuculidae	Crotophaga_ani	Anu_preto	100	PNB	lane	1	09:35:00	169714	8258333	23L	sirgass_2000	09:58:00	1	removed	1	0	7.3	26.5	16.2	20.32	74.25	775	two_lane	2	DF_001	0	0.0315279	0.210186	0.320129	0.109943	0.107518	0	0.158448	0.0420372
59	2	2013	april	autumn	3	17_04_2013	wild	small_mammals	Mammals	Rodentia	Cricetidae	Cerradomys_scotti	Rato_silvestre	90	PNB	lane	1	10:40:00	192578	8264226	23L	sirgass_2000	11:07:00	1	removed	1	0	7.3	26.5	16.2	20.32	74.25	775	two_lane	2	DF_001	0	0.154472	0.360976	0	0.0455285	0.189431	0.0813008	0.0780488	0.0487805
60	2	2013	april	autumn	3	17_04_2013	wild	small_reptiles	Reptile	Squamata	Amphisbaenidae	AmphisbaeNA_alba	Cobra_de_duas_cabeças	25	ESECAE	shoulder	2	10:47:00	217606	8273917	23L	sirgass_2000	12:17:00	1	removed	1	0	7.3	26.5	16.2	20.32	74.25	5000	four_lane	3	BR_010_BR_020_BR_030	0	0.106624	0.568659	0	0.0533118	0	0.141357	0.0775444	0.0201939
61	3	2013	may	autumn	3	06_05_2013	wild	small_reptiles	Reptile	Squamata	Amphisbaenidae	AmphisbaeNA_alba	Cobra_de_duas_cabeças	25	ESECAE	shoulder	2	08:03:00	218462	8273814	23L	sirgass_2000	00:00:00	72	removed	1	3	0	28.4	14.5	21.84	53	5000	four_lane	3	BR_010_BR_020_BR_030	0	0.0646204	0.646204	0	0.0500808	0	0.0476575	0.159128	0
62	3	2013	may	autumn	3	06_05_2013	wild	small_reptiles	Reptile	Squamata	Dipsadidae	Oxyrhopus_sp	Coral_falsa	80	PNB	shoulder	2	10:35:00	168837	8263186	23L	sirgass_2000	00:00:00	1	removed	1	0	0	28.4	14.5	21.84	53	775	two_lane	2	DF_001	0	0.137175	0.453734	0	0.0300325	0.0600649	0	0.255682	0.038961
63	3	2013	may	autumn	3	07_05_2013	wild	small_birds	Birds	Passeriformes	NA	NA	Passeriforme	25	ESECAE	lane	1	09:05:00	224149	8275291	23L	sirgass_2000	00:00:00	24	removed	1	1	0	28.4	17.5	22.1	60.25	5000	four_lane	3	BR_010_BR_020_BR_030	0	0.023539	0.421266	0	0.00811688	0.000811688	0	0.497565	0
64	3	2013	may	autumn	3	07_05_2013	wild	small_mammals	Mammals	Chiroptera	Phyllostomidae	Glossophaga_sp	Morcego	20	ESECAE	shoulder	2	09:40:00	218247	8281063	23L	sirgass_2000	00:00:00	1	removed	1	0	0	28.4	17.5	22.1	60.25	2600	two_lane	2	DF_128	0	0.123586	0.441842	0	0.0234249	0.0347334	0	0.346527	0
65	3	2013	may	autumn	3	07_05_2013	wild	Large_reptiles	Reptile	Squamata	Boidae	Epicrates_cenchria	Jiboia_arco_iris	3000	PNB	lane	1	10:50:00	192354	8264430	23L	sirgass_2000	00:00:00	24	removed	1	1	0	28.4	17.5	22.1	60.25	775	two_lane	2	DF_001	0	0.124696	0.418623	0	0.0421053	0.20081	0.0526316	0.0801619	0.0453441
66	3	2013	may	autumn	3	07_05_2013	wild	Large_reptiles	Reptile	Squamata	Boidae	Epicrates_cenchria	Jiboia_arco_iris	3000	PNB	shoulder	2	10:57:00	189849	8266452	23L	sirgass_2000	00:00:00	72	removed	1	3	0	28.4	17.5	22.1	60.25	775	two_lane	2	DF_001	0.00161031	0.0700483	0.693237	0	0.037037	0.152174	0.00563607	0.0281804	0
67	3	2013	may	autumn	3	07_05_2013	wild	Large_reptiles	Reptile	Squamata	Viperidae	Crotalus_durissus	Cascavel	550	PNB	lane	1	12:19:00	170803	8257775	23L	sirgass_2000	00:00:00	1	removed	1	0	0	28.4	17.5	22.1	60.25	8000	two_lane	2	DF_001	0	0.0337892	0.297667	0.315366	0.133548	0.172164	0	0.0329847	0
68	3	2013	may	autumn	3	07_05_2013	wild	small_birds	Birds	NA	NA	NA	ave_silvestre	NA	JBB	lane	1	13:33:00	196964	8237294	23L	sirgass_2000	00:00:00	48	removed	1	2	0	28.4	17.5	22.1	60.25	7000	four_lane	3	DF_001	0	0.0567261	0.705024	0	0.0235008	0.0243112	0.0194489	0.141815	0
69	3	2013	may	autumn	3	08_05_2013	wild	small_reptiles	Reptile	Squamata	Dipsadidae	Philodryas_sp	Cobra_cipo	150	FAL	lane	1	11:57:00	180357	8231410	23L	sirgass_2000	00:00:00	48	removed	1	2	0	26.6	15	19.92	66.5	2000	two_lane	2	BR_251	0	0.0299111	0.632983	0	0.047696	0.169766	0.043654	0.0210186	0
70	3	2013	may	autumn	3	08_05_2013	wild	small_birds	Birds	Passeriformes	Melanopareiidae	Melanopareia_torquata	tapaculo_de_colarinho	16	FAL	shoulder	2	12:06:00	183860	8231004	23L	sirgass_2000	00:00:00	1	removed	1	0	0	26.6	15	19.92	66.5	2000	two_lane	2	BR_251	0.00161943	0.0242915	0.702834	0	0.101215	0.0340081	0	0.097166	0
71	3	2013	may	autumn	3	08_05_2013	wild	small_birds	Birds	Passeriformes	Emberizidae	Volatinia_jacariNA	Tiziu	10	FAL	lane	1	12:31:00	197062	8237487	23L	sirgass_2000	00:00:00	1	removed	1	0	0	26.6	15	19.92	66.5	7000	four_lane	3	DF_001	0	0.0582524	0.733819	0	0.026699	0.0226537	0.0161812	0.115696	0
72	4	2013	june	autumn	3	17_06_2013	domestic	Large_mammals	Mammals	Carnivora	Canidae	Canis_familiaris	Cachorro_Domestico	10000	ESECAE	shoulder	2	08:12:00	223800	8275149	23L	sirgass_2000	08:14:00	1	removed	1	0	0	27.4	14.7	21.18	61	5000	four_lane	3	BR_010_BR_020_BR_030	0	0.0219512	0.449593	0	0.00569106	0.000813008	0	0.472358	0
73	4	2013	june	autumn	3	17_06_2013	domestic	medium_mammals	Mammals	Carnivora	Felidae	Felis_catus	Gato_Domestico	5000	ESECAE	shoulder	2	08:28:00	213640	8274030	23L	sirgass_2000	00:00:00	96	remained	0	4	0	27.4	14.7	21.18	61	5000	four_lane	3	BR_010_BR_020_BR_030	0	0.297166	0.291498	0	0.0923077	0.0145749	0.182186	0.0412955	0.0315789
74	4	2013	june	autumn	3	17_06_2013	wild	small_mammals	Mammals	Primates	Cebidae	Callithrix_penicillata	Sagui	400	ESECAE	lane	1	08:51:00	217308	8280075	23L	sirgass_2000	00:00:00	24	removed	1	1	0	27.4	14.7	21.18	61	2600	two_lane	2	DF_128	0	0.0943548	0.489516	0	0.033871	0.0112903	0	0.346774	0
75	4	2013	june	autumn	3	17_06_2013	domestic	medium_mammals	Mammals	Carnivora	Felidae	Felis_catus	Gato_Domestico	5000	PNB	lane	1	10:11:00	184507	8270357	23L	sirgass_2000	00:00:00	96	remained	0	4	0	27.4	14.7	21.18	61	775	two_lane	2	DF_001	0	0.00162734	0.383238	0	0.0878763	0.0219691	0	0.491456	0
76	4	2013	june	autumn	3	17_06_2013	wild	large_birds	Birds	Strigiforme	Strigidae	NA	Coruja	200	PNB	lane	1	10:13:00	184147	8270624	23L	sirgass_2000	00:00:00	96	remained	0	4	0	27.4	14.7	21.18	61	775	two_lane	2	DF_001	0	0.00161812	0.369741	0	0.105178	0.026699	0	0.48301	0
77	4	2013	june	autumn	3	17_06_2013	domestic	small_birds	Ave	Passeriformes	Passeridae	Passer_domesticus	Pardal	26	PNB	lane	1	10:22:00	183092	8271403	23L	sirgass_2000	10:04:00	1	removed	1	0	0	27.4	14.7	21.18	61	775	two_lane	2	DF_001	0	0.00486224	0.380875	0	0.113452	0.012966	0	0.474068	0
78	4	2013	june	autumn	3	17_06_2013	wild	large_birds	Birds	Strigiforme	Strigidae	NA	Coruja	200	PNB	lane	1	10:54:00	168722	8264193	23L	sirgass_2000	10:47:00	1	removed	1	0	0	27.4	14.7	21.18	61	775	two_lane	2	DF_001	0	0.13177	0.401778	0	0.0282943	0.061439	0	0.181892	0.174616
79	4	2013	june	autumn	3	17_06_2013	wild	medium_mammals	Mammals	Carnivora	Mustelidae	Galictis_cuja	Furao	1600	PNB	shoulder	2	11:12:00	173568	8255598	23L	sirgass_2000	00:00:00	96	remained	0	4	0	27.4	14.7	21.18	61	8000	two_lane	2	DF_001	0	0.0486224	0.378444	0.123177	0.0340357	0.104538	0	0.295786	0
80	4	2013	june	autumn	3	18_06_2013	domestic	Large_mammals	Mammals	Carnivora	Canidae	Canis_familiaris	Cachorro_Domestico	10000	ESECAE	shoulder	2	08:05:00	219448	8273795	23L	sirgass_2000	00:00:00	72	removed	1	3	0	27.2	15.8	21.26	56.5	5000	four_lane	3	BR_010_BR_020_BR_030	0	0.037368	0.603574	0	0.0454915	0	0.00487409	0.276198	0
81	4	2013	june	autumn	3	18_06_2013	wild	large_birds	Birds	Accipitriformes	Accipitridae	Rupornis_magnirostris	Gaviao_carijo	300	PNB	shoulder	2	10:54:00	173485	8255888	23L	sirgass_2000	00:00:00	72	removed	1	3	0	27.2	15.8	21.26	56.5	8000	two_lane	2	DF_001	0	0.0355987	0.436084	0.118123	0.0291262	0.12055	0	0.245146	0
82	4	2013	june	autumn	3	18_06_2013	wild	small_reptiles	Reptile	Squamata	Teiidae	Ameiva_ameiva	Lagarto	22	PNB	lane	1	10:54:00	173485	8255888	23L	sirgass_2000	00:00:00	1	removed	1	0	0	27.2	15.8	21.26	56.5	8000	two_lane	2	DF_001	0	0.0355987	0.436084	0.118123	0.0291262	0.12055	0	0.245146	0
83	4	2013	june	autumn	3	18_06_2013	wild	small_birds	Birds	Passeriformes	Thraupidae	Cypsnagra_hirundinacea	Bandoleta	28	IBGE	shoulder	2	11:58:00	192476	8233373	23L	sirgass_2000	00:00:00	1	removed	1	0	0	27.2	15.8	21.26	56.5	2000	two_lane	2	BR_251	0	0.0906883	0.375709	0	0.0412955	0.0477733	0.00809717	0.422672	0
84	4	2013	june	autumn	3	19_06_2013	wild	small_birds	Birds	Galbuliforme	Bucconidae	Nystalus_chacuru	Joao_Bobo	64	PNB	shoulder	2	10:42:00	173556	8254027	23L	sirgass_2000	00:00:00	24	removed	1	1	0	26.4	14.8	20.64	55.5	8000	two_lane	2	DF_001	0	0.121655	0.232766	0.154096	0.0429846	0.0478508	0	0.390105	0
85	4	2013	june	autumn	3	19_06_2013	wild	small_birds	Birds	Passeriformes	Emberizidae	Ammodramus_humeralis	Tico_tico_do_campo	15	IBGE	shoulder	2	11:39:00	192727	8233597	23L	sirgass_2000	00:00:00	1	removed	1	0	0	26.4	14.8	20.64	55.5	2000	two_lane	2	BR_251	0	0.0924574	0.397405	0	0.0421736	0.0437956	0.0081103	0.395783	0.00567721
86	5	2013	july	winter	4	29_07_2013	wild	small_birds	Birds	Passeriformes	Emberizidae	Zonotrichia_capensis	Tico_Tico	16	JBB	shoulder	2	08:46:00	194732	8235333	23L	sirgass_2000	08:35:00	1	removed	1	0	0	28	13.2	20.6	39	2000	two_lane	2	DF_001	0	0.128745	0.480162	0	0.0186235	0.00809717	0.0275304	0.275304	0.0356275
87	5	2013	july	winter	4	29_07_2013	domestic	medium_mammals	Mammals	Carnivora	Felidae	Felis_catus	Gato_Domestico	5000	PNB	shoulder	2	10:27:00	180504	8273377	23L	sirgass_2000	00:00:00	96	remained	0	4	0	28	13.2	20.6	39	775	two_lane	2	DF_001	0	0.111826	0.429606	0	0.0691874	0.0152856	0	0.361223	0
88	5	2013	july	winter	4	29_07_2013	domestic	Large_mammals	Mammals	Carnivora	Canidae	Canis_familiaris	Cachorro_Domestico	10000	PNB	lane	1	10:37:00	182099	8272163	23L	sirgass_2000	00:00:00	48	removed	1	2	0	28	13.2	20.6	39	775	two_lane	2	DF_001	0	0.00974026	0.38474	0	0.112013	0.0251623	0	0.454545	0
89	5	2013	july	winter	4	29_07_2013	wild	small_mammals	Mammals	Didelphimorphia	Didelphidae	Didelphis_albiventris	Gamba_ou_Sarue_	900	ESECAE	shoulder	2	11:25:00	215655	8274018	23L	sirgass_2000	00:00:00	96	remained	0	4	0	28	13.2	20.6	39	5000	four_lane	3	BR_010_BR_020_BR_030	0	0.231205	0.345998	0	0.0978173	0	0.228779	0.0113177	0.0525465
90	5	2013	july	winter	4	29_07_2013	domestic	Large_mammals	Mammals	Carnivora	Canidae	Canis_familiaris	Cachorro_Domestico	10000	ESECAE	shoulder	2	11:29:00	217160	8273918	23L	sirgass_2000	00:00:00	96	remained	0	4	0	28	13.2	20.6	39	5000	four_lane	3	BR_010_BR_020_BR_030	0	0.121065	0.522195	0	0.0540759	0	0.19209	0.0403551	0.0387409
91	5	2013	july	winter	4	30_07_2013	domestic	Large_mammals	Mammals	Carnivora	Canidae	Canis_familiaris	Cachorro_Domestico	10000	ESECAE	shoulder	2	12:00:00	213823	8274043	23L	sirgass_2000	00:00:00	1	removed	1	0	0	27.1	13.1	20.46	41	5000	four_lane	3	BR_010_BR_020_BR_030	0	0.276786	0.303571	0	0.0982143	0.00974026	0.185877	0.0397727	0.0373377
92	5	2013	july	winter	4	30_07_2013	wild	large_birds	Birds	Strigiforme	Strigidae	NA	Coruja	200	ESECAE	shoulder	2	12:09:00	217374	8274012	23L	sirgass_2000	00:00:00	72	removed	1	3	0	27.1	13.1	20.46	41	5000	four_lane	3	BR_010_BR_020_BR_030	0	0.111292	0.569456	0	0.0519903	0	0.147035	0.0519903	0.0365556
93	5	2013	july	winter	4	30_07_2013	wild	large_birds	Birds	Strigiforme	Strigidae	Megascops_choliba	Corujinha_do_Mato	160	ESECAE	shoulder	2	12:42:00	212811	8275464	23L	sirgass_2000	00:00:00	72	removed	1	3	0	27.1	13.1	20.46	41	2600	two_lane	2	DF_128	0.0949675	0.288961	0.300325	0	0.038961	0	0.00405844	0.205357	0.0381494
94	5	2013	july	winter	4	31_07_2013	wild	small_birds	Birds	Passeriformes	NA	NA	Passeriforme	25	FAL	lane	1	09:20:00	187456	8231161	23L	sirgass_2000	00:00:00	1	removed	1	0	0	26.5	15.9	20.5	43.25	2000	two_lane	2	BR_251	0	0.0397083	0.941653	0	0.00567261	0.000810373	0	0	0
95	5	2013	july	winter	4	31_07_2013	wild	Large_reptiles	Reptile	Squamata	Viperidae	Crotalus_durissus	Cascavel	550	ESECAE	shoulder	2	13:25:00	212926	8275586	23L	sirgass_2000	00:00:00	48	removed	1	2	0	26.5	15.9	20.5	43.25	2600	two_lane	2	DF_128	0.083266	0.273242	0.308812	0	0.0420372	0	0	0.226354	0.039612
96	6	2013	august	winter	4	26_08_2013	wild	small_birds	Birds	Columbiforme	Columbidae	ColumbiNA_talpacoti	Rolinha	47	ESECAE	lane	1	08:26:00	213721	8274023	23L	sirgass_2000	08:32:00	96	remained	0	4	0	31.6	15.5	23.72	33.75	5000	four_lane	3	BR_010_BR_020_BR_030	0	0.289516	0.292742	0	0.0943548	0.0145161	0.18629	0.0403226	0.033871
97	6	2013	august	winter	4	26_08_2013	domestic	Large_mammals	Mammals	Carnivora	Canidae	Canis_familiaris	Cachorro_Domestico	10000	ESECAE	lane	1	10:22:00	218591	8281410	23L	sirgass_2000	08:46:00	96	remained	0	4	0	31.6	15.5	23.72	33.75	2600	two_lane	2	DF_128	0	0.141586	0.416667	0	0.026699	0.0299353	0	0.351942	0
98	6	2013	august	winter	4	26_08_2013	domestic	Large_mammals	Mammals	Carnivora	Canidae	Canis_familiaris	Cachorro_Domestico	10000	PNB	lane	1	10:22:00	173728	8271915	23L	sirgass_2000	10:03:00	1	removed	1	0	0	31.6	15.5	23.72	33.75	775	dirt_road	1	DF_001	0	0.0670978	0.459175	0	0.039612	0.274859	0	0.12207	0.0266774
99	6	2013	august	winter	4	26_08_2013	wild	small_mammals	Mammals	Rodentia	Cricetidae	Necromys_lasiurus	Rato_silvestre	40	PNB	lane	1	11:03:00	173316	8252893	23L	sirgass_2000	10:44:00	96	remained	0	4	0	31.6	15.5	23.72	33.75	8000	two_lane	2	DF_001	0	0.176375	0.191748	0.150485	0.02589	0.113269	0.102751	0.197411	0.00323625
100	6	2013	august	winter	4	26_08_2013	domestic	large_birds	Ave	Columbiforme	Columbidae	Columba_livia	Pombo	360	PNB	shoulder	2	11:03:00	173318	8252898	23L	sirgass_2000	10:44:00	96	remained	0	4	0	31.6	15.5	23.72	33.75	8000	two_lane	2	DF_001	0	0.175851	0.192058	0.150729	0.0259319	0.113452	0.102107	0.197731	0.00324149
101	6	2013	august	winter	4	27_08_2013	wild	medium_mammals	Mammals	Carnivora	Mephitidae	Conepatus_semistriatus	Jaritataca	3400	ESECAE	shoulder	2	08:52:00	226496	8278921	23L	sirgass_2000	09:09:00	24	removed	1	1	0	28.4	15.9	20.78	52.5	951	two_lane	2	BR_010_DF_345	0	0.0193705	0.443906	0	0.047619	0.0637611	0	0.400323	0
102	6	2013	august	winter	4	28_08_2013	domestic	medium_mammals	Mammals	Carnivora	Felidae	Felis_catus	Gato_Domestico	5000	ESECAE	lane	1	09:27:00	216230	8274029	23L	sirgass_2000	08:28:00	24	removed	1	1	0	28.3	12	19.48	31	5000	four_lane	3	BR_010_BR_020_BR_030	0	0.17342	0.455429	0	0.0599676	0	0.226904	0	0.0518639
103	7	2013	september	winter	4	16_09_2013	domestic	Large_mammals	Mammals	Carnivora	Canidae	Canis_familiaris	Cachorro_Domestico	10000	PNB	shoulder	2	10:40:00	168827	8263436	23L	sirgass_2000	10:42:00	72	removed	1	3	0	32.2	19.4	24.84	42.75	775	two_lane	2	DF_001	0	0.140194	0.451378	0	0.0267423	0.060778	0	0.232577	0.0623987
104	7	2013	september	winter	4	16_09_2013	domestic	large_birds	Ave	Columbiforme	Columbidae	Columba_livia	Pombo	360	PNB	lane	1	11:00:00	173019	8252166	23L	sirgass_2000	10:55:00	24	removed	1	1	0	32.2	19.4	24.84	42.75	8000	two_lane	2	DF_001	0	0.186386	0.150729	0.115883	0.0251216	0.095624	0.271475	0.0923825	0.0105348
105	7	2013	september	winter	4	17_09_2013	wild	large_birds	Birds	Strigiforme	Strigidae	NA	Coruja	200	ESECAE	lane	1	07:43:00	216893	8273943	23L	sirgass_2000	07:59:00	1	removed	1	0	0	32.6	19.2	26.4	39.75	5000	four_lane	3	BR_010_BR_020_BR_030	0	0.130048	0.504039	0	0.0573506	0	0.21567	0.0218094	0.0387722
106	7	2013	september	winter	4	18_09_2013	wild	small_mammals	Mammals	Didelphimorphia	Didelphidae	Didelphis_albiventris	Gamba_ou_Sarue_	900	ESECAE	shoulder	2	08:42:00	216414	8279181	23L	sirgass_2000	08:45:00	48	removed	1	2	36	26.9	15.9	20.2	76.25	2600	two_lane	2	DF_128	0	0.0716586	0.495974	0	0.0434783	0.00483092	0	0.311594	0.0611916
107	8	2013	october	spring	1	21_10_2013	wild	small_birds	Birds	Apodiforme	Trochilidae	NA	Beija_flor	8	ESECAE	lane	1	08:05:00	217113	8273930	23L	sirgass_2000	08:05:00	1	removed	1	0	0	30.4	17	22.76	62.75	5000	four_lane	3	BR_010_BR_020_BR_030	0	0.123387	0.519355	0	0.0556452	0	0.196774	0.033871	0.0387097
108	8	2013	october	spring	1	21_10_2013	wild	small_reptiles	Reptile	Squamata	Dipsadidae	Oxyrhopus_sp	Coral_falsa	80	ESECAE	shoulder	2	08:50:00	213086	8273768	23L	sirgass_2000	08:08:00	96	remained	0	4	0	30.4	17	22.76	62.75	2600	two_lane	2	DF_128	0	0.329298	0.224374	0	0.0855529	0.0145278	0.226796	0.0427764	0.0258273
109	8	2013	october	spring	1	21_10_2013	wild	small_mammals	Mammals	Chiroptera	Phyllostomidae	Glossophaga_sp	Morcego	20	ESECAE	shoulder	2	08:58:00	212806	8275467	23L	sirgass_2000	08:12:00	96	remained	0	4	0	30.4	17	22.76	62.75	2600	two_lane	2	DF_128	0.095624	0.288493	0.299838	0	0.0388979	0	0.00405186	0.205835	0.0380875
110	8	2013	october	spring	1	21_10_2013	wild	small_birds	Birds	Passeriformes	Emberizidae	Volatinia_jacariNA	Tiziu	10	ESECAE	shoulder	2	09:08:00	216050	8278804	23L	sirgass_2000	09:08:00	1	removed	1	0	0	30.4	17	22.76	62.75	2600	two_lane	2	DF_128	0	0.0596774	0.493548	0	0.0225806	0.00483871	0	0.266129	0.13871
111	8	2013	october	spring	1	21_10_2013	domestic	medium_mammals	Mammals	Carnivora	Felidae	Felis_catus	Gato_Domestico	5000	ESECAE	shoulder	2	09:14:00	217470	8280267	23L	sirgass_2000	08:23:00	96	remained	0	4	0	30.4	17	22.76	62.75	2600	two_lane	2	DF_128	0	0.106538	0.480226	0	0.0322841	0.0201776	0	0.335755	0
112	8	2013	october	spring	1	21_10_2013	wild	Large_mammals	Mammals	Carnivora	Canidae	Cerdocyon_thous	Cachorro_do_Mato	5700	ESECAE	lane	1	09:43:00	225269	8277260	23L	sirgass_2000	08:39:00	96	remained	0	4	0	30.4	17	22.76	62.75	951	two_lane	2	BR_010_DF_345	0	0.0121261	0.475344	0	0.0129345	0.00242522	0	0.458367	0
113	8	2013	october	spring	1	21_10_2013	wild	Large_reptiles	Reptile	Squamata	Boidae	Epicrates_cenchria	Jiboia_arco_iris	3000	PNB	shoulder	2	10:22:00	187675	8268056	23L	sirgass_2000	10:22:00	1	removed	1	0	0	30.4	17	22.76	62.75	775	two_lane	2	DF_001	0	0.0234249	0.637318	0	0.0250404	0.0105008	0	0.222132	0.0678514
114	8	2013	october	spring	1	21_10_2013	wild	small_reptiles	Reptile	Squamata	Teiidae	Cnemidophorus_ocellifer	Calango	4	PNB	lane	1	10:31:00	184641	8270288	23L	sirgass_2000	10:31:00	1	removed	1	0	0	30.4	17	22.76	62.75	775	two_lane	2	DF_001	0	0.00243309	0.385239	0	0.081103	0.0227088	0	0.495539	0
115	8	2013	october	spring	1	21_10_2013	domestic	Large_mammals	Mammals	Carnivora	Canidae	Canis_familiaris	Cachorro_Domestico	10000	PNB	shoulder	2	10:47:00	181761	8272431	23L	sirgass_2000	10:02:00	96	remained	0	4	0	30.4	17	22.76	62.75	775	two_lane	2	DF_001	0	0.025974	0.411526	0	0.0917208	0.0267857	0	0.431006	0
116	8	2013	october	spring	1	21_10_2013	wild	small_birds	Birds	Passeriformes	Emberizidae	Volatinia_jacariNA	Tiziu	10	FAL	lane	1	12:34:00	186987	8230964	23L	sirgass_2000	12:34:00	1	removed	1	0	0	30.4	17	22.76	62.75	2000	two_lane	2	BR_251	0	0.0378727	0.938759	0	0.0104754	0	0	0	0
117	8	2013	october	spring	1	21_10_2013	wild	small_birds	Birds	Passeriformes	Emberizidae	Volatinia_jacariNA	Tiziu	10	FAL	lane	1	13:39:00	188344	8231497	23L	sirgass_2000	13:39:00	1	removed	1	0	0	30.4	17	22.76	62.75	2000	two_lane	2	BR_251	0	0.0282943	0.939369	0	0.00404204	0.00889248	0	0.00646726	0
118	8	2013	october	spring	1	21_10_2013	wild	Large_reptiles	Reptile	Squamata	Dipsadidae	Pseudoboa_nigra	Cobra_Preta	180	JBB	shoulder	2	13:01:00	198069	8239748	23L	sirgass_2000	13:01:00	1	removed	1	0	0	30.4	17	22.76	62.75	7000	four_lane	3	DF_001	0	0.163035	0.539952	0	0.00807103	0.0145278	0.0217918	0.229217	0
119	8	2013	october	spring	1	21_10_2013	wild	small_birds	Birds	Passeriformes	NA	NA	Passeriforme	25	JBB	lane	1	13:04:00	198100	8240183	23L	sirgass_2000	13:04:00	1	removed	1	0	0	30.4	17	22.76	62.75	7000	four_lane	3	DF_001	0	0.157385	0.470541	0	0.00322841	0.00807103	0.0742534	0.256659	0
120	8	2013	october	spring	1	22_10_2013	wild	medium_mammals	Mammals	Carnivora	Canidae	Pseudalopex_vetulus	Raposinha	3400	ESECAE	shoulder	2	07:39:00	217901	8273859	23L	sirgass_2000	07:56:00	72	removed	1	3	1.9	30.2	17.8	23.12	67.25	5000	four_lane	3	BR_010_BR_020_BR_030	0	0.100649	0.594968	0	0.0551948	0	0.11039	0.105519	0.000811688
121	8	2013	october	spring	1	22_10_2013	wild	small_birds	Birds	Caprimulgiforme	Caprimulgidae	Chordeiles_pusillus	Bacurauzinho	34	ESECAE	shoulder	2	08:05:00	217964	8273890	23L	sirgass_2000	08:05:00	1	removed	1	0	1.9	30.2	17.8	23.12	67.25	5000	four_lane	3	BR_010_BR_020_BR_030	0	0.0962005	0.606306	0	0.0549717	0	0.100243	0.109943	0
122	8	2013	october	spring	1	22_10_2013	wild	small_birds	Birds	Passeriformes	Emberizidae	NA	Passeriforme	25	ESECAE	shoulder	2	08:31:00	213721	8274023	23L	sirgass_2000	08:31:00	1	removed	1	0	1.9	30.2	17.8	23.12	67.25	5000	four_lane	3	BR_010_BR_020_BR_030	0	0.289516	0.292742	0	0.0943548	0.0145161	0.18629	0.0403226	0.033871
123	8	2013	october	spring	1	22_10_2013	wild	small_birds	Birds	Passeriformes	NA	NA	Passeriforme	25	ESECAE	lane	1	09:04:00	219146	8281572	23L	sirgass_2000	08:25:00	72	removed	1	3	1.9	30.2	17.8	23.12	67.25	33	dirt_road	1	DF_205	0	0.119644	0.444624	0	0.0185934	0.0291027	0	0.342765	0.0113177
124	8	2013	october	spring	1	22_10_2013	wild	small_birds	Birds	Passeriformes	NA	NA	Passeriforme	25	PNB	lane	1	10:35:00	174603	8273047	23L	sirgass_2000	10:35:00	1	removed	1	0	1.9	30.2	17.8	23.12	67.25	775	dirt_road	1	DF_001	0	0.0934959	0.372358	0	0.0536585	0.265854	0	0.0422764	0.162602
125	8	2013	october	spring	1	22_10_2013	wild	Large_reptiles	Reptile	Squamata	Dipsadidae	Boiruna_maculata	Cobra_Preta	180	JBB	shoulder	2	12:30:00	197954	8241163	23L	sirgass_2000	12:30:00	1	removed	1	0	1.9	30.2	17.8	23.12	67.25	7000	four_lane	3	DF_001	0	0.0705596	0.433901	0	0.0178427	0.0300081	0.191403	0.224655	0
126	8	2013	october	spring	1	23_10_2013	wild	Large_reptiles	Reptile	Squamata	Viperidae	Crotalus_durissus	Cascavel	550	ESECAE	shoulder	2	08:21:00	219836	8273857	23L	sirgass_2000	08:01:00	48	removed	1	2	0.5	29.9	17.4	23.92	44.25	5000	four_lane	3	BR_010_BR_020_BR_030	0	0.0354267	0.549919	0	0.0426731	0	0	0.339775	0
127	8	2013	october	spring	1	23_10_2013	wild	small_reptiles	Reptile	Squamata	Teiidae	Ameiva_ameiva	Lagarto	22	ESECAE	shoulder	2	08:25:00	219164	8273793	23L	sirgass_2000	08:03:00	48	removed	1	2	0.5	29.9	17.4	23.92	44.25	5000	four_lane	3	BR_010_BR_020_BR_030	0	0.0389294	0.635036	0	0.0470397	0	0.0113544	0.235199	0
128	8	2013	october	spring	1	23_10_2013	wild	small_birds	Birds	Passeriformes	Tyrannidae	Tyrannus_savana	Tesourinha	33	ESECAE	shoulder	2	08:40:00	214139	8274121	23L	sirgass_2000	08:06:00	48	removed	1	2	0.5	29.9	17.4	23.92	44.25	5000	four_lane	3	BR_010_BR_020_BR_030	0	0.242892	0.334687	0	0.103168	0.00487409	0.186028	0.0308692	0.0495532
129	8	2013	october	spring	1	23_10_2013	wild	large_birds	Birds	Strigiforme	Strigidae	Athene_cunicularia	Coruja_buraqueira	200	ESECAE	shoulder	2	08:59:00	215471	8278211	23L	sirgass_2000	08:59:00	1	removed	1	0	0.5	29.9	17.4	23.92	44.25	2600	two_lane	2	DF_128	0	0.0746753	0.476461	0	0.0170455	0.00487013	0	0.18263	0.228084
130	8	2013	october	spring	1	23_10_2013	wild	small_birds	Birds	Passeriformes	NA	NA	Passeriforme	25	ESECAE	lane	1	09:03:00	216848	8279625	23L	sirgass_2000	09:03:00	1	removed	1	0	0.5	29.9	17.4	23.92	44.25	2600	two_lane	2	DF_128	0	0.0777328	0.493117	0	0.0421053	0.00161943	0	0.359514	0.011336
131	8	2013	october	spring	1	23_10_2013	domestic	Large_mammals	Mammals	Carnivora	Canidae	Canis_familiaris	Cachorro_Domestico	10000	PNB	shoulder	2	11:10:00	169127	8259980	23L	sirgass_2000	10:32:00	48	removed	1	2	0.5	29.9	17.4	23.92	44.25	775	two_lane	2	DF_001	0	0.0597256	0.285714	0.00242131	0.0920097	0.117837	0	0.305085	0.11703
132	9	2013	november	spring	1	04_11_2013	wild	small_birds	Birds	NA	NA	NA	ave_silvestre	NA	JBB	shoulder	2	09:25:00	194492	8235123	23L	sirgass_2000	09:25:00	1	removed	1	0	0	28.4	17.6	23.44	50.25	2000	two_lane	2	DF_001	0	0.126613	0.468548	0	0.0241935	0.00725806	0.0185484	0.294355	0.0354839
133	9	2013	november	spring	1	04_11_2013	wild	small_birds	Birds	Passeriformes	Emberizidae	Volatinia_jacariNA	Tiziu	10	FAL	shoulder	2	09:36:00	189980	8232155	23L	sirgass_2000	09:36:00	1	removed	1	0	0	28.4	17.6	23.44	50.25	2000	two_lane	2	BR_251	0	0.0491539	0.712329	0	0.0451249	0.0177276	0	0.163578	0
134	9	2013	november	spring	1	04_11_2013	wild	small_reptiles	Reptile	Squamata	Dipsadidae	Oxyrhopus_rhombifer	Coral_falsa	80	PNB	shoulder	2	10:44:00	173722	8254366	23L	sirgass_2000	10:44:00	1	removed	1	0	0	28.4	17.6	23.44	50.25	8000	two_lane	2	DF_001	0	0.0899514	0.233387	0.128849	0.0340357	0.0494327	0	0.451378	0
135	9	2013	november	spring	1	04_11_2013	wild	small_birds	Birds	Apodiforme	Trochilidae	Polytmus_theresiae	Beija_flor	8	PNB	shoulder	2	10:51:00	173510	8255747	23L	sirgass_2000	10:51:00	1	removed	1	0	0	28.4	17.6	23.44	50.25	8000	two_lane	2	DF_001	0	0.0408497	0.40768	0.123366	0.0326797	0.112745	0	0.26634	0
136	9	2013	november	spring	1	04_11_2013	domestic	medium_mammals	Mammals	Carnivora	Felidae	Felis_catus	Gato_Domestico	5000	PNB	shoulder	2	11:05:00	168886	8262759	23L	sirgass_2000	00:00:00	24	removed	1	1	0	28.4	17.6	23.44	50.25	775	two_lane	2	DF_001	0	0.124799	0.471014	0	0.037037	0.0587762	0	0.270531	0.0128824
137	9	2013	november	spring	1	04_11_2013	wild	small_birds	Birds	Passeriformes	NA	NA	Passeriforme	25	PNB	lane	1	11:11:00	168866	8264700	23L	sirgass_2000	11:11:00	1	removed	1	0	0	28.4	17.6	23.44	50.25	775	dirt_road	1	DF_001	0	0.0889248	0.392078	0	0.0161681	0.0953921	0	0.171382	0.214228
138	9	2013	november	spring	1	04_11_2013	wild	Large_reptiles	Reptile	Squamata	Boidae	Boa_constrictor	jiboia	4000	PNB	shoulder	2	11:45:00	184900	8270052	23L	sirgass_2000	00:00:00	96	remained	0	4	0	28.4	17.6	23.44	50.25	775	two_lane	2	DF_001	0	0.00162075	0.408428	0	0.0680713	0.0186386	0	0.489465	0
139	9	2013	november	spring	1	04_11_2013	wild	large_birds	Birds	Tinamiforme	TiNAmidae	Rhynchotus_rufescens	Perdiz	300	ESECAE	shoulder	2	13:02:00	219227	8273734	23L	sirgass_2000	00:00:00	96	remained	0	4	0	28.4	17.6	23.44	50.25	5000	four_lane	3	BR_010_BR_020_BR_030	0	0.0397083	0.623987	0	0.0461912	0	0.0113452	0.246353	0
140	9	2013	november	spring	1	04_11_2013	domestic	large_birds	Ave	Galliforme	Phasianidae	Gallus_gallus_domesticus	Galinha	1500	ESECAE	lane	1	13:04:00	219457	8273722	23L	sirgass_2000	13:04:00	1	removed	1	0	0	28.4	17.6	23.44	50.25	5000	four_lane	3	BR_010_BR_020_BR_030	0	0.0380259	0.599515	0	0.0453074	0	0.00485437	0.279935	0
141	9	2013	november	spring	1	04_11_2013	wild	small_birds	Birds	Apodiforme	Trochilidae	Polytmus_theresiae	Beija_flor	8	ESECAE	shoulder	2	13:36:00	212543	8275008	23L	sirgass_2000	13:36:00	1	removed	1	0	0	28.4	17.6	23.44	50.25	2600	two_lane	2	DF_128	0.119644	0.30962	0.256265	0	0.0468876	0	0.0590137	0.135004	0.0355699
142	9	2013	november	spring	1	04_11_2013	wild	large_birds	Birds	Strigiforme	Strigidae	Asio_clamator	Coruja_orelhuda	400	ESECAE	shoulder	2	13:40:00	212667	8275311	23L	sirgass_2000	13:40:00	1	removed	1	0	0	28.4	17.6	23.44	50.25	2600	two_lane	2	DF_128	0.111201	0.299513	0.284903	0	0.038961	0	0.0194805	0.178571	0.036526
143	9	2013	november	spring	1	04_11_2013	wild	small_birds	Birds	Passeriformes	Emberizidae	Volatinia_jacariNA	Tiziu	10	ESECAE	lane	1	13:45:00	214070	8276770	23L	sirgass_2000	13:45:00	1	removed	1	0	0	28.4	17.6	23.44	50.25	2600	two_lane	2	DF_128	0	0.09135	0.412288	0	0.0234438	0	0	0.28941	0.169766
144	9	2013	november	spring	1	04_11_2013	wild	small_birds	Birds	Passeriformes	Emberizidae	Volatinia_jacariNA	Tiziu	10	ESECAE	lane	1	13:54:00	217153	8279943	23L	sirgass_2000	13:54:00	1	removed	1	0	0	28.4	17.6	23.44	50.25	2600	two_lane	2	DF_128	0	0.0890688	0.480972	0	0.0388664	0.00728745	0	0.361943	0
145	9	2013	november	spring	1	05_11_2013	domestic	Large_mammals	Mammals	Carnivora	Canidae	Canis_familiaris	Cachorro_Domestico	10000	PNB	lane	1	12:08:00	187366	8268269	23L	sirgass_2000	00:00:00	24	removed	1	1	14.2	24.1	17.2	19.14	92.5	775	two_lane	2	DF_001	0	0.0194175	0.599515	0	0.0210356	0.00728155	0	0.271845	0.0671521
146	9	2013	november	spring	1	05_11_2013	wild	small_birds	Birds	Cuculiforme	Cuculidae	Crotophaga_ani	Anu_preto	100	ESECAE	shoulder	2	12:51:00	218955	8273757	23L	sirgass_2000	00:00:00	72	removed	1	3	14.2	24.1	17.2	19.14	92.5	5000	four_lane	3	BR_010_BR_020_BR_030	0	0.039612	0.646726	0	0.047696	0	0.0242522	0.209378	0
147	9	2013	november	spring	1	05_11_2013	wild	Large_reptiles	Reptile	Squamata	Viperidae	Crotalus_durissus	Cascavel	550	ESECAE	shoulder	2	13:34:00	212547	8275024	23L	sirgass_2000	00:00:00	72	removed	1	3	14.2	24.1	17.2	19.14	92.5	2600	two_lane	2	DF_128	0.118932	0.306634	0.261327	0	0.0469256	0	0.0566343	0.136731	0.0355987
148	9	2013	november	spring	1	05_11_2013	domestic	Large_mammals	Mammals	Carnivora	Canidae	Canis_familiaris	Cachorro_Domestico	10000	ESECAE	shoulder	2	13:45:00	215767	8278516	23L	sirgass_2000	00:00:00	72	removed	1	3	14.2	24.1	17.2	19.14	92.5	2600	two_lane	2	DF_128	0	0.0642276	0.489431	0	0.0162602	0.00487805	0	0.217073	0.19187
149	9	2013	november	spring	1	05_11_2013	domestic	Large_mammals	Mammals	Carnivora	Canidae	Canis_familiaris	Cachorro_Domestico	10000	ESECAE	shoulder	2	13:53:00	217464	8280260	23L	sirgass_2000	00:00:00	72	removed	1	3	14.2	24.1	17.2	19.14	92.5	2600	two_lane	2	DF_128	0	0.106883	0.480162	0	0.0323887	0.0194332	0	0.336032	0
150	9	2013	november	spring	1	06_11_2013	wild	small_birds	Birds	Passeriformes	Emberizidae	Zonotrichia_capensis	Tico_tico	16	PNB	lane	1	10:36:00	173247	8252700	23L	sirgass_2000	10:36:00	1	removed	1	0	8	23.1	16.8	19.1	92	8000	two_lane	2	DF_001	0	0.178658	0.17785	0.145513	0.0266774	0.114794	0.146322	0.163298	0.00485044
151	9	2013	november	spring	1	06_11_2013	wild	small_birds	Birds	Passeriformes	Emberizidae	Volatinia_jacariNA	Tiziu	10	PNB	lane	1	11:00:00	168851	8263149	23L	sirgass_2000	11:00:00	1	removed	1	0	8	23.1	16.8	19.1	92	775	two_lane	2	DF_001	0	0.133172	0.458434	0	0.0298628	0.0613398	0	0.255851	0.0371267
152	9	2013	november	spring	1	06_11_2013	wild	small_birds	Birds	Caprimulgiforme	Caprimulgidae	Chordeiles_pusillus	Bacurauzinho	34	PNB	shoulder	2	11:39:00	182534	8271881	23L	sirgass_2000	11:39:00	1	removed	1	0	8	23.1	16.8	19.1	92	775	two_lane	2	DF_001	0	0.00650407	0.376423	0	0.108943	0.0211382	0	0.473171	0
153	9	2013	november	spring	1	06_11_2013	wild	small_birds	Birds	Passeriformes	NA	NA	Passeriforme	25	PNB	lane	1	11:55:00	185956	8269306	23L	sirgass_2000	11:55:00	1	removed	1	0	8	23.1	16.8	19.1	92	775	two_lane	2	DF_001	0	0.00241935	0.433065	0	0.0330645	0.0201613	0	0.443548	0.0548387
154	10	2013	december	spring	1	16_12_2013	wild	medium_mammals	Mammals	Carnivora	Mustelidae	Galictis_cuja	Furao	1600	JBB	shoulder	2	08:33:00	195699	8236197	23L	sirgass_2000	08:33:00	1	removed	1	0	5.4	24.5	18.3	20.64	89.75	2000	two_lane	2	DF_001	0	0.123987	0.559157	0	0.0170178	0.00567261	0.0307942	0.221232	0.00567261
155	10	2013	december	spring	1	16_12_2013	wild	small_birds	Birds	Passeriformes	Emberizidae	Volatinia_jacariNA	Tiziu	10	FAL	shoulder	2	08:56:00	189926	8232131	23L	sirgass_2000	08:56:00	1	removed	1	0	5.4	24.5	18.3	20.64	89.75	2000	two_lane	2	BR_251	0	0.0461538	0.721457	0	0.0445344	0.017004	0	0.158704	0
156	10	2013	december	spring	1	16_12_2013	wild	small_birds	Birds	NA	NA	NA	ave_silvestre	NA	PNB	shoulder	2	10:08:00	173466	8253243	23L	sirgass_2000	10:08:00	1	removed	1	0	5.4	24.5	18.3	20.64	89.75	8000	two_lane	2	DF_001	0	0.166667	0.203074	0.156149	0.0275081	0.105178	0.0477346	0.261327	0
157	10	2013	december	spring	1	16_12_2013	domestic	Large_mammals	Mammals	Carnivora	Canidae	Canis_familiaris	Cachorro_Domestico	10000	PNB	shoulder	2	10:16:00	173485	8255763	23L	sirgass_2000	09:00:00	96	remained	0	4	5.4	24.5	18.3	20.64	89.75	8000	two_lane	2	DF_001	0	0.0402253	0.408689	0.126307	0.0353982	0.113435	0	0.259855	0
158	10	2013	december	spring	1	16_12_2013	wild	small_birds	Birds	Apodiforme	Trochilidae	NA	Beija_flor	8	PNB	lane	1	10:32:00	168924	8262294	23L	sirgass_2000	10:32:00	1	removed	1	0	5.4	24.5	18.3	20.64	89.75	775	two_lane	2	DF_001	0	0.126214	0.480583	0	0.0453074	0.052589	0	0.272654	0
159	10	2013	december	spring	1	16_12_2013	wild	small_birds	Birds	Passeriformes	Emberizidae	Volatinia_jacariNA	Tiziu	10	PNB	shoulder	2	10:39:00	168830	8263396	23L	sirgass_2000	10:39:00	1	removed	1	0	5.4	24.5	18.3	20.64	89.75	775	two_lane	2	DF_001	0	0.140891	0.452632	0	0.0275304	0.059919	0	0.234008	0.059919
160	10	2013	december	spring	1	16_12_2013	wild	small_birds	Birds	Passeriformes	Emberizidae	Volatinia_jacariNA	Tiziu	10	PNB	shoulder	2	10:43:00	168809	8263663	23L	sirgass_2000	10:43:00	1	removed	1	0	5.4	24.5	18.3	20.64	89.75	775	two_lane	2	DF_001	0	0.136364	0.444805	0	0.0275974	0.0592532	0	0.215097	0.0925325
161	10	2013	december	spring	1	16_12_2013	wild	small_birds	Birds	Passeriformes	Emberizidae	Volatinia_jacariNA	Tiziu	10	PNB	shoulder	2	12:01:00	184494	8270384	23L	sirgass_2000	12:10:00	72	removed	1	3	5.4	24.5	18.3	20.64	89.75	775	two_lane	2	DF_001	0	0.00242131	0.380145	0	0.0855529	0.0258273	0	0.492333	0
162	10	2013	december	spring	1	16_12_2013	wild	small_birds	Birds	Passeriformes	Emberizidae	Volatinia_jacariNA	Tiziu	10	ESECAE	shoulder	2	12:47:00	215884	8274021	23L	sirgass_2000	13:25:00	48	removed	1	2	5.4	24.5	18.3	20.64	89.75	5000	four_lane	3	BR_010_BR_020_BR_030	0	0.226016	0.37561	0	0.0739837	0	0.234146	0.00487805	0.0528455
163	10	2013	december	spring	1	16_12_2013	wild	small_birds	Birds	Passeriformes	Tyrannidae	Machetornis_rixosa	Suiriri_Cavalheiro	32	ESECAE	shoulder	2	13:09:00	222426	8274666	23L	sirgass_2000	13:12:00	24	removed	1	1	5.4	24.5	18.3	20.64	89.75	5000	four_lane	3	BR_010_BR_020_BR_030	0	0.00648298	0.491086	0	0	0	0	0.461102	0
164	10	2013	december	spring	1	16_12_2013	wild	small_birds	Birds	Cuculiforme	Cuculidae	Crotophaga_ani	Anu_preto	100	ESECAE	shoulder	2	13:15:00	220398	8274033	23L	sirgass_2000	13:56:00	48	removed	1	2	5.4	24.5	18.3	20.64	89.75	5000	four_lane	3	BR_010_BR_020_BR_030	0	0.0282486	0.489104	0	0.0387409	0	0	0.411622	0
165	10	2013	december	spring	1	16_12_2013	wild	small_birds	Birds	Passeriformes	Tyrannidae	Tyrannus_savana	Tesourinha	33	ESECAE	shoulder	2	13:18:00	220234	8273983	23L	sirgass_2000	13:18:00	1	removed	1	0	5.4	24.5	18.3	20.64	89.75	5000	four_lane	3	BR_010_BR_020_BR_030	0	0.0308943	0.496748	0	0.0398374	0	0	0.4	0
166	10	2013	december	spring	1	16_12_2013	wild	large_birds	Birds	Tinamiforme	TiNAmidae	Nhotura_sp.	CodorNA	300	ESECAE	shoulder	2	13:25:00	218622	8273838	23L	sirgass_2000	10:32:00	96	remained	0	4	5.4	24.5	18.3	20.64	89.75	5000	four_lane	3	BR_010_BR_020_BR_030	0	0.0534846	0.659643	0	0.0494327	0	0.0291734	0.175041	0
167	10	2013	december	spring	1	16_12_2013	wild	small_mammals	Mammals	Chiroptera	Phyllostomidae	NA	Morcego	20	ESECAE	shoulder	2	13:26:00	218630	8273837	23L	sirgass_2000	10:32:00	96	remained	0	4	5.4	24.5	18.3	20.64	89.75	5000	four_lane	3	BR_010_BR_020_BR_030	0	0.0534413	0.659109	0	0.0493927	0	0.0291498	0.175709	0
168	10	2013	december	spring	1	16_12_2013	wild	Large_reptiles	Reptile	Testudines	Chelidae	Phrynops_geoffroanus	Cagado_de_barbicha	2000	ESECAE	shoulder	2	13:43:00	212562	8274668	23L	sirgass_2000	14:44:00	96	remained	0	4	5.4	24.5	18.3	20.64	89.75	2600	two_lane	2	DF_128	0.0940032	0.32658	0.231767	0	0.0470016	0.00162075	0.115073	0.106159	0.0364668
169	10	2013	december	spring	1	16_12_2013	wild	small_birds	Birds	Passeriformes	Emberizidae	Volatinia_jacariNA	Tiziu	10	ESECAE	shoulder	2	13:49:00	212822	8275500	23L	sirgass_2000	10:48:00	96	remained	0	4	5.4	24.5	18.3	20.64	89.75	2600	two_lane	2	DF_128	0.0941558	0.286526	0.30276	0	0.0397727	0	0.00162338	0.209416	0.0381494
170	10	2013	december	spring	1	17_12_2013	wild	small_birds	Birds	Passeriformes	Emberizidae	Volatinia_jacariNA	Tiziu	10	JBB	shoulder	2	08:07:00	197068	8237504	23L	sirgass_2000	08:27:00	24	removed	1	1	3.1	28.2	18.6	22.02	81.75	7000	four_lane	3	DF_001	0	0.0612903	0.733065	0	0.0274194	0.0217742	0.016129	0.11371	0
171	10	2013	december	spring	1	17_12_2013	wild	small_birds	Birds	Passeriformes	NA	NA	Passeriforme	25	JBB	lane	1	08:32:00	196350	8236784	23L	sirgass_2000	08:32:00	1	removed	1	0	3.1	28.2	18.6	22.02	81.75	2000	two_lane	2	DF_001	0	0.0848828	0.645109	0	0.0145513	0.0161681	0.00970089	0.197251	0
172	10	2013	december	spring	1	17_12_2013	wild	small_birds	Birds	Passeriformes	Tyrannidae	Machetornis_rixosa	Suiriri_Cavalheiro	32	PNB	lane	1	12:00:00	187209	8268388	23L	sirgass_2000	12:42:00	24	removed	1	1	3.1	28.2	18.6	22.02	81.75	775	two_lane	2	DF_001	0	0.0153473	0.572698	0	0.0250404	0.00646204	0	0.298869	0.0678514
173	10	2013	december	spring	1	17_12_2013	domestic	large_birds	Ave	Columbiforme	Columbidae	Columba_livia	Pombo	360	ESECAE	shoulder	2	12:39:00	213579	8273941	23L	sirgass_2000	10:14:00	72	removed	1	3	3.1	28.2	18.6	22.02	81.75	5000	four_lane	3	BR_010_BR_020_BR_030	0	0.306452	0.276613	0	0.0927419	0.0145161	0.191129	0.0419355	0.0266129
174	10	2013	december	spring	1	17_12_2013	wild	small_mammals	Mammals	Chiroptera	Phyllostomidae	NA	Morcego	20	ESECAE	shoulder	2	13:26:00	218857	8273817	23L	sirgass_2000	10:30:00	72	removed	1	3	3.1	28.2	18.6	22.02	81.75	5000	four_lane	3	BR_010_BR_020_BR_030	0	0.0420712	0.658576	0	0.0477346	0	0.0218447	0.197411	0
175	10	2013	december	spring	1	17_12_2013	wild	small_birds	Birds	Passeriformes	Emberizidae	Volatinia_jacariNA	Tiziu	10	ESECAE	shoulder	2	13:31:00	218429	8273842	23L	sirgass_2000	10:35:00	72	removed	1	3	3.1	28.2	18.6	22.02	81.75	5000	four_lane	3	BR_010_BR_020_BR_030	0	0.066129	0.646774	0	0.0516129	0	0.0475806	0.154839	0
176	10	2013	december	spring	1	17_12_2013	domestic	large_birds	Ave	Columbiforme	Columbidae	Columba_livia	Pombo	360	ESECAE	shoulder	2	13:46:00	215453	8274022	23L	sirgass_2000	10:40:00	72	removed	1	3	3.1	28.2	18.6	22.02	81.75	5000	four_lane	3	BR_010_BR_020_BR_030	0	0.232821	0.325788	0	0.11156	0	0.228779	0.0169766	0.0525465
177	10	2013	december	spring	1	17_12_2013	wild	Large_reptiles	Reptile	Testudines	Chelidae	Phrynops_geoffroanus	Cagado_de_barbicha	2000	ESECAE	shoulder	2	13:57:00	212649	8275288	23L	sirgass_2000	14:28:00	24	removed	1	1	3.1	28.2	18.6	22.02	81.75	2600	two_lane	2	DF_128	0.113729	0.303818	0.281072	0	0.0389927	0	0.0219334	0.17303	0.0357433
178	10	2013	december	spring	1	17_12_2013	wild	small_birds	Birds	Passeriformes	Tyrannidae	Tyrannus_savana	Tesourinha	33	ESECAE	shoulder	2	14:08:00	215102	8277838	23L	sirgass_2000	14:40:00	24	removed	1	1	3.1	28.2	18.6	22.02	81.75	2600	two_lane	2	DF_128	0	0.0793522	0.4583	0	0.0161943	0.0048583	0	0.181377	0.243725
179	10	2013	december	spring	1	18_12_2013	wild	small_reptiles	Reptile	Squamata	Dipsadidae	Sibynomorphus_mikanii	Jararaquinha_dormideira	150	IBGE	shoulder	2	08:50:00	194335	8234978	23L	sirgass_2000	08:50:00	1	removed	1	0	17	26.2	17.9	21.18	82.25	2000	two_lane	2	DF_001	0	0.126829	0.462602	0	0.0260163	0.00894309	0.0130081	0.301626	0.0357724
180	10	2013	december	spring	1	18_12_2013	wild	small_birds	Birds	Passeriformes	Furnariidae	Anumbius_annumbi	Cochicho	49	IBGE	shoulder	2	09:00:00	190415	8232324	23L	sirgass_2000	09:00:00	1	removed	1	0	17	26.2	17.9	21.18	82.25	2000	two_lane	2	BR_251	0	0.0507246	0.628019	0	0.0539452	0.0273752	0	0.227858	0
181	10	2013	december	spring	1	18_12_2013	wild	Large_reptiles	Reptile	Squamata	Viperidae	Crotalus_durissus	Cascavel	550	IBGE	lane	1	09:04:00	190392	8232313	23L	sirgass_2000	09:04:00	1	removed	1	0	17	26.2	17.9	21.18	82.25	2000	two_lane	2	BR_251	0	0.0501213	0.632175	0	0.0541633	0.0266774	0	0.223929	0
182	10	2013	december	spring	1	18_12_2013	wild	small_reptiles	Reptile	Squamata	Amphisbaenidae	AmphisbaeNA_alba	Cobra_de_duas_cabeças	25	IBGE	lane	1	09:08:00	190228	8232249	23L	sirgass_2000	09:08:00	1	removed	1	0	17	26.2	17.9	21.18	82.25	2000	two_lane	2	BR_251	0	0.0484653	0.66559	0	0.0500808	0.0226171	0	0.200323	0
183	10	2013	december	spring	1	18_12_2013	wild	small_birds	Birds	Passeriformes	Emberizidae	Volatinia_jacariNA	Tiziu	10	IBGE	lane	1	09:12:00	188904	8231727	23L	sirgass_2000	09:12:00	1	removed	1	0	17	26.2	17.9	21.18	82.25	2000	two_lane	2	BR_251	0	0.0273532	0.888174	0	0.0176991	0.0120676	0	0.0418343	0
184	10	2013	december	spring	1	18_12_2013	wild	small_birds	Birds	Passeriformes	Emberizidae	Volatinia_jacariNA	Tiziu	10	IBGE	lane	1	09:23:00	184730	8230721	23L	sirgass_2000	09:23:00	1	removed	1	0	17	26.2	17.9	21.18	82.25	2000	two_lane	2	BR_251	0	0.0250809	0.814725	0	0.092233	0.0169903	0	0.0299353	0
185	10	2013	december	spring	1	18_12_2013	wild	small_birds	Birds	Passeriformes	Emberizidae	Ammodramus_humeralis	tico_tico_do_campo	15	IBGE	shoulder	2	09:26:00	184284	8230869	23L	sirgass_2000	09:26:00	1	removed	1	0	17	26.2	17.9	21.18	82.25	2000	two_lane	2	BR_251	0.00161421	0.0225989	0.74657	0	0.107345	0.0242131	0	0.0694108	0
186	10	2013	december	spring	1	18_12_2013	wild	large_birds	Birds	Strigiforme	Strigidae	Athene_cunicularia	Coruja_buraqueira	200	IBGE	shoulder	2	09:34:00	182001	8231594	23L	sirgass_2000	09:32:00	24	removed	1	1	17	26.2	17.9	21.18	82.25	2000	two_lane	2	BR_251	0.00161812	0.0364078	0.622168	0	0.0849515	0.0582524	0.0250809	0.127023	0
187	10	2013	december	spring	1	18_12_2013	wild	small_reptiles	Reptile	Squamata	Amphisbaenidae	AmphisbaeNA_alba	Cobra_de_duas_cabeças	25	IBGE	lane	1	09:39:00	180971	8231549	23L	sirgass_2000	09:39:00	1	removed	1	0	17	26.2	17.9	21.18	82.25	2000	two_lane	2	BR_251	0.00161421	0.0347054	0.617433	0	0.0653753	0.109766	0.0274415	0.079096	0
188	10	2013	december	spring	1	18_12_2013	wild	small_birds	Birds	Passeriformes	Emberizidae	Zonotrichia_capensis	Tico_tico	16	PNB	shoulder	2	10:40:00	173135	8256570	23L	sirgass_2000	10:40:00	1	removed	1	0	17	26.2	17.9	21.18	82.25	8000	two_lane	2	DF_001	0	0.0387409	0.528652	0.109766	0.039548	0.159806	0	0.108152	0
189	10	2013	december	spring	1	18_12_2013	wild	small_birds	Birds	Cuculiforme	Cuculidae	Crotophaga_ani	Anu_preto	100	PNB	shoulder	2	11:00:00	168821	8263487	23L	sirgass_2000	11:00:00	1	removed	1	0	17	26.2	17.9	21.18	82.25	775	two_lane	2	DF_001	0	0.138822	0.450363	0	0.0274415	0.0597256	0	0.22841	0.0694108
190	10	2013	december	spring	1	18_12_2013	domestic	medium_mammals	Mammals	Carnivora	Felidae	Felis_catus	Gato_Domestico	5000	PNB	shoulder	2	11:38:00	178821	8274662	23L	sirgass_2000	09:43:00	48	removed	1	2	17	26.2	17.9	21.18	82.25	775	two_lane	2	DF_001	0	0.0478508	0.420925	0	0.0437956	0.00567721	0	0.468775	0
191	10	2013	december	spring	1	18_12_2013	domestic	medium_mammals	Mammals	Carnivora	Felidae	Felis_catus	Gato_Domestico	5000	PNB	shoulder	2	11:48:00	180199	8273614	23L	sirgass_2000	09:40:00	48	removed	1	2	17	26.2	17.9	21.18	82.25	775	two_lane	2	DF_001	0	0.113893	0.434572	0	0.0662359	0.0121163	0	0.359451	0
192	10	2013	december	spring	1	18_12_2013	wild	small_birds	Birds	Passeriformes	Emberizidae	Volatinia_jacariNA	Tiziu	10	PNB	shoulder	2	12:37:00	186121	8269189	23L	sirgass_2000	09:21:00	48	removed	1	2	17	26.2	17.9	21.18	82.25	775	two_lane	2	DF_001	0	0.00403226	0.433065	0	0.0322581	0.0201613	0	0.437097	0.0604839
193	10	2013	december	spring	1	18_12_2013	wild	small_birds	Birds	Passeriformes	Emberizidae	Volatinia_jacariNA	Tiziu	10	PNB	shoulder	2	12:49:00	189902	8266408	23L	sirgass_2000	12:49:00	1	removed	1	0	17	26.2	17.9	21.18	82.25	775	two_lane	2	DF_001	0.00161812	0.066343	0.691748	0	0.0372168	0.156958	0.00647249	0.0275081	0
194	10	2013	december	spring	1	18_12_2013	wild	small_birds	Birds	Passeriformes	Emberizidae	Volatinia_jacariNA	Tiziu	10	PNB	shoulder	2	12:56:00	192907	8263947	23L	sirgass_2000	12:56:00	1	removed	1	0	17	26.2	17.9	21.18	82.25	775	two_lane	2	DF_001	0.000814332	0.201954	0.307003	0	0.0513029	0.162866	0.109935	0.0659609	0.0529316
195	10	2013	december	spring	1	18_12_2013	wild	large_birds	Birds	Strigiforme	Strigidae	Athene_cunicularia	Coruja_buraqueira	200	ESECAE	shoulder	2	13:45:00	223408	8274973	23L	sirgass_2000	13:23:00	24	removed	1	1	17	26.2	17.9	21.18	82.25	5000	four_lane	3	BR_010_BR_020_BR_030	0	0.0217918	0.472962	0	0	0.000807103	0	0.456013	0
196	10	2013	december	spring	1	18_12_2013	wild	Large_reptiles	Reptile	Squamata	Viperidae	Crotalus_durissus	cascavel	550	ESECAE	shoulder	2	14:00:00	219535	8273785	23L	sirgass_2000	10:20:00	48	removed	1	2	17	26.2	17.9	21.18	82.25	5000	four_lane	3	BR_010_BR_020_BR_030	0	0.0372168	0.593042	0	0.0453074	0	0.00242718	0.289644	0
197	10	2013	december	spring	1	18_12_2013	wild	small_mammals	Mammals	Chiroptera	NA	NA	Morcego	20	ESECAE	shoulder	2	14:10:00	218186	8273872	23L	sirgass_2000	10:37:00	48	removed	1	2	17	26.2	17.9	21.18	82.25	5000	four_lane	3	BR_010_BR_020_BR_030	0	0.0794165	0.628039	0	0.0567261	0	0.0721232	0.13047	0
198	10	2013	december	spring	1	18_12_2013	wild	small_mammals	Mammals	Chiroptera	Phyllostomidae	NA	Morcego	20	ESECAE	lane	1	14:13:00	218091	8273878	23L	sirgass_2000	10:38:00	48	removed	1	2	17	26.2	17.9	21.18	82.25	5000	four_lane	3	BR_010_BR_020_BR_030	0	0.08636	0.619048	0	0.0564972	0	0.0831316	0.12268	0
199	10	2013	december	spring	1	18_12_2013	wild	small_birds	Birds	Passeriformes	Emberizidae	Volatinia_jacariNA	Tiziu	10	ESECAE	shoulder	2	14:31:00	212725	8275385	23L	sirgass_2000	14:06:00	24	removed	1	1	17	26.2	17.9	21.18	82.25	2600	two_lane	2	DF_128	0.103476	0.299111	0.28941	0	0.039612	0	0.0121261	0.190784	0.0363783
200	10	2013	december	spring	1	18_12_2013	wild	small_birds	Birds	Passeriformes	Emberizidae	Volatinia_jacariNA	Tiziu	10	ESECAE	lane	1	14:41:00	216713	8279496	23L	sirgass_2000	14:41:00	1	removed	1	0	17	26.2	17.9	21.18	82.25	2600	two_lane	2	DF_128	0	0.0711399	0.491512	0	0.0428456	0.00485044	0	0.358933	0.0202102
201	10	2013	december	spring	1	18_12_2013	wild	small_birds	Birds	Passeriformes	Turdidae	Turdus_leucomelas	sabia	100	ESECAE	shoulder	2	14:50:00	218407	8281235	23L	sirgass_2000	14:50:00	1	removed	1	0	17	26.2	17.9	21.18	82.25	2600	two_lane	2	DF_128	0	0.136842	0.42915	0	0.0218623	0.0315789	0	0.349798	0
202	11	2014	january	summer	2	06_01_2014	wild	Large_reptiles	Reptile	Testudines	Chelidae	Phrynops_geoffroanus	Cagado_de_barbicha	2000	ESECAE	lane	1	08:07:00	219321	8273725	23L	sirgass_2000	08:07:00	1	removed	1	0	0	28.7	19.1	22.64	62.5	5000	four_lane	3	BR_010_BR_020_BR_030	0	0.0378422	0.613527	0	0.0450886	0	0.0112721	0.260064	0
203	11	2014	january	summer	2	06_01_2014	wild	small_birds	Birds	Caprimulgiforme	Caprimulgidae	Hidropsalis_albicollis	Bacurau	45	ESECAE	shoulder	2	08:21:00	223254	8274919	23L	sirgass_2000	08:25:00	48	removed	1	2	0	28.7	19.1	22.64	62.5	5000	four_lane	3	BR_010_BR_020_BR_030	0	0.0201939	0.482229	0	0	0.000807754	0	0.448304	0
204	11	2014	january	summer	2	06_01_2014	wild	small_birds	Birds	Passeriformes	NA	NA	Passeriforme	25	ESECAE	shoulder	2	08:43:00	212562	8274668	23L	sirgass_2000	08:43:00	1	removed	1	0	0	28.7	19.1	22.64	62.5	2600	two_lane	2	DF_128	0.0940032	0.32658	0.231767	0	0.0470016	0.00162075	0.115073	0.106159	0.0364668
205	11	2014	january	summer	2	06_01_2014	wild	large_birds	Birds	Strigiforme	Tytonidae	Tyto_alba	Suindara	500	ESECAE	shoulder	2	08:49:00	214308	8277016	23L	sirgass_2000	08:05:00	96	remained	0	4	0	28.7	19.1	22.64	62.5	2600	two_lane	2	DF_128	0	0.094431	0.417272	0	0.0169492	0.00161421	0	0.271186	0.188055
206	11	2014	january	summer	2	06_01_2014	wild	Large_mammals	Mammals	Carnivora	Canidae	Cerdocyon_thous	Cachorro_do_mato	5700	ESECAE	shoulder	2	08:55:00	215940	8278692	23L	sirgass_2000	08:11:00	96	remained	0	4	0	28.7	19.1	22.64	62.5	2600	two_lane	2	DF_128	0	0.0565885	0.493937	0	0.0210186	0.00485044	0	0.244947	0.163298
207	11	2014	january	summer	2	06_01_2014	wild	large_birds	Birds	Strigiforme	Strigidae	Athene_cunicularia	Coruja_buraqueira	200	ESECAE	shoulder	2	08:58:00	216213	8278974	23L	sirgass_2000	08:15:00	96	remained	0	4	0	28.7	19.1	22.64	62.5	2600	two_lane	2	DF_128	0	0.0692432	0.494364	0	0.0297907	0.00483092	0	0.28744	0.101449
208	11	2014	january	summer	2	06_01_2014	domestic	Large_mammals	Mammals	Carnivora	Canidae	Canis_familiaris	Cachorro_Domestico	10000	ESECAE	lane	1	09:51:00	213414	8273907	23L	sirgass_2000	07:57:00	96	remained	0	4	0	28.7	19.1	22.64	62.5	5000	four_lane	3	BR_010_BR_020_BR_030	0	0.318513	0.261924	0	0.0905416	0.0145513	0.195635	0.043654	0.0250606
209	11	2014	january	summer	2	06_01_2014	domestic	Large_mammals	Mammals	Carnivora	Canidae	Canis_familiaris	Cachorro_Domestico	10000	PNB	shoulder	2	10:24:00	186951	8268587	23L	sirgass_2000	10:24:00	1	removed	1	0	0	28.7	19.1	22.64	62.5	775	two_lane	2	DF_001	0	0.0145631	0.530744	0	0.02589	0.00889968	0	0.338188	0.0679612
210	11	2014	january	summer	2	06_01_2014	wild	large_birds	Birds	Tinamiforme	TiNAmidae	Rhynchotus_rufescens	Perdiz	300	PNB	shoulder	2	10:27:00	186215	8269128	23L	sirgass_2000	10:27:00	1	removed	1	0	0	28.7	19.1	22.64	62.5	775	two_lane	2	DF_001	0	0.00643604	0.433628	0	0.0337892	0.0217216	0	0.427997	0.0635559
211	11	2014	january	summer	2	06_01_2014	wild	small_birds	Birds	Passeriformes	Emberizidae	Volatinia_jacariNA	Tiziu	10	PNB	lane	1	10:38:00	183868	8270854	23L	sirgass_2000	10:38:00	1	removed	1	0	0	28.7	19.1	22.64	62.5	775	two_lane	2	DF_001	0	0.00322581	0.362097	0	0.120968	0.0201613	0	0.480645	0
212	11	2014	january	summer	2	06_01_2014	wild	small_birds	Birds	Passeriformes	Emberizidae	Volatinia_jacariNA	Tiziu	10	PNB	lane	1	10:50:00	178556	8274867	23L	sirgass_2000	11:00:00	48	removed	1	2	0	28.7	19.1	22.64	62.5	775	two_lane	2	DF_001	0	0.0405186	0.397893	0	0.034846	0.00567261	0	0.507293	0
213	11	2014	january	summer	2	06_01_2014	wild	small_birds	Birds	Passeriformes	NA	NA	Passeriforme	25	PNB	lane	1	10:52:00	178348	8275027	23L	sirgass_2000	11:02:00	72	removed	1	3	0	28.7	19.1	22.64	62.5	775	two_lane	2	DF_001	0	0.042915	0.373279	0	0.0251012	0.00566802	0	0.537652	0
214	11	2014	january	summer	2	06_01_2014	wild	small_birds	Birds	Passeriformes	NA	NA	Passeriforme	25	PNB	lane	1	10:55:00	177938	8275333	23L	sirgass_2000	10:55:00	1	removed	1	0	0	28.7	19.1	22.64	62.5	775	two_lane	2	DF_001	0	0.0516546	0.324455	0	0.00484262	0.00887813	0	0.577078	0.0161421
215	11	2014	january	summer	2	06_01_2014	wild	small_reptiles	Reptile	Squamata	Dipsadidae	Philodryas_patagoniensis	Cobra_cipo	150	PNB	lane	1	11:11:00	170420	8269931	23L	sirgass_2000	09:36:00	96	remained	0	4	0	28.7	19.1	22.64	62.5	775	dirt_road	1	DF_001	0	0.0539887	0.24577	0	0.0241741	0.181305	0	0.436745	0.0394843
216	11	2014	january	summer	2	06_01_2014	domestic	Large_mammals	Mammals	Carnivora	Canidae	Canis_familiaris	Cachorro_Domestico	10000	PNB	lane	1	11:26:00	168879	8262708	23L	sirgass_2000	09:50:00	96	remained	0	4	0	28.7	19.1	22.64	62.5	775	two_lane	2	DF_001	0	0.126112	0.475344	0	0.0371867	0.0573969	0	0.2692	0.00970089
217	11	2014	january	summer	2	06_01_2014	wild	small_birds	Birds	Passeriformes	Emberizidae	Volatinia_jacariNA	Tiziu	10	PNB	lane	1	11:32:00	169157	8259443	23L	sirgass_2000	11:32:00	24	removed	1	1	0	28.7	19.1	22.64	62.5	775	two_lane	2	DF_001	0	0.0404858	0.243725	0.0842105	0.0947368	0.11417	0	0.287449	0.11417
218	11	2014	january	summer	2	06_01_2014	domestic	Large_mammals	Mammals	Carnivora	Canidae	Canis_familiaris	Cachorro_Domestico	10000	PNB	lane	1	11:34:00	169190	8259191	23L	sirgass_2000	09:56:00	96	remained	0	4	0	28.7	19.1	22.64	62.5	775	two_lane	2	DF_001	0	0.038835	0.226537	0.130259	0.0841424	0.110032	0	0.278317	0.109223
219	11	2014	january	summer	2	06_01_2014	wild	small_birds	Birds	Passeriformes	Emberizidae	Volatinia_jacariNA	Tiziu	10	IBGE	shoulder	2	13:09:00	193109	8233876	23L	sirgass_2000	13:09:00	1	removed	1	0	0	28.7	19.1	22.64	62.5	2000	two_lane	2	BR_251	0	0.0959677	0.420161	0	0.0459677	0.0185484	0.00806452	0.366129	0.0266129
220	11	2014	january	summer	2	06_01_2014	wild	small_birds	Birds	Passeriformes	NA	NA	Passeriforme	25	JBB	lane	1	13:22:00	197704	8238728	23L	sirgass_2000	13:50:00	48	removed	1	2	0	28.7	19.1	22.64	62.5	7000	four_lane	3	DF_001	0	0.173773	0.703942	0	0.0297667	0.0176991	0	0.0522928	0
221	11	2014	january	summer	2	07_01_2014	domestic	Large_mammals	Mammals	Carnivora	Canidae	Canis_familiaris	Cachorro_Domestico	10000	ESECAE	shoulder	2	08:23:00	219015	8273798	23L	sirgass_2000	07:54:00	72	removed	1	3	0	28.9	17.4	23.28	53.25	5000	four_lane	3	BR_010_BR_020_BR_030	0	0.0404204	0.645109	0	0.047696	0	0.017785	0.216653	0
222	11	2014	january	summer	2	07_01_2014	wild	small_birds	Birds	Passeriformes	NA	NA	Passeriforme	25	ESECAE	shoulder	2	08:35:00	213004	8273882	23L	sirgass_2000	08:00:00	72	removed	1	3	0	28.9	17.4	23.28	53.25	2600	two_lane	2	DF_128	0	0.344883	0.229654	0	0.0797744	0.0145044	0.209508	0.0402901	0.0306205
223	11	2014	january	summer	2	07_01_2014	wild	small_reptiles	Reptile	Squamata	Dipsadidae	Oxyrhopus_guibei	Coral_falsa	80	ESECAE	lane	1	09:15:00	227964	8282589	23L	sirgass_2000	09:37:00	48	removed	1	2	0	28.9	17.4	23.28	53.25	33	dirt_road	1	DF_205	0	0.0105178	0.263754	0	0.00485437	0	0	0.686893	0
224	11	2014	january	summer	2	07_01_2014	wild	small_birds	Birds	Passeriformes	Emberizidae	Volatinia_jacariNA	Tiziu	10	PNB	shoulder	2	10:14:00	186104	8269213	23L	sirgass_2000	10:14:00	1	removed	1	0	0	28.9	17.4	23.28	53.25	775	two_lane	2	DF_001	0	0.00242522	0.434115	0	0.0323363	0.0202102	0	0.438965	0.0590137
225	11	2014	january	summer	2	07_01_2014	wild	small_birds	Birds	Passeriformes	Emberizidae	Volatinia_jacariNA	Tiziu	10	PNB	lane	1	10:33:00	180135	8273670	23L	sirgass_2000	10:33:00	1	removed	1	0	0	28.9	17.4	23.28	53.25	775	two_lane	2	DF_001	0	0.113801	0.432607	0	0.0653753	0.0129136	0	0.362389	0
226	11	2014	january	summer	2	07_01_2014	wild	small_birds	Birds	Passeriformes	NA	NA	Passeriforme	25	PNB	lane	1	10:41:00	179223	8274365	23L	sirgass_2000	10:57:00	48	removed	1	2	0	28.9	17.4	23.28	53.25	775	two_lane	2	DF_001	0	0.0680713	0.437601	0	0.0502431	0.00810373	0	0.422204	0
227	11	2014	january	summer	2	07_01_2014	wild	small_birds	Birds	Passeriformes	Emberizidae	Volatinia_jacariNA	Tiziu	10	IBGE	lane	1	13:18:00	193023	8233795	23L	sirgass_2000	13:33:00	48	removed	1	2	0	28.9	17.4	23.28	53.25	2000	two_lane	2	BR_251	0	0.0940032	0.4141	0	0.0437601	0.0226904	0.00810373	0.376823	0.0235008
228	11	2014	january	summer	2	07_01_2014	wild	large_birds	Birds	Strigiforme	Strigidae	Athene_cunicularia	Coruja_buraqueira	200	JBB	lane	1	13:42:00	196856	8237103	23L	sirgass_2000	10:56:00	72	removed	1	3	0	28.9	17.4	23.28	53.25	7000	four_lane	3	DF_001	0	0.0647773	0.671255	0	0.0218623	0.0242915	0.0194332	0.166802	0
229	11	2014	january	summer	2	08_01_2014	wild	small_birds	Birds	Passeriformes	Emberizidae	Volatinia_jacariNA	Tiziu	10	ESECAE	lane	1	08:19:00	223539	8274976	23L	sirgass_2000	07:47:00	48	removed	1	2	0	28.3	16.8	23.1	45.5	5000	four_lane	3	BR_010_BR_020_BR_030	0	0.0219334	0.451665	0	0.0016247	0.000812348	0	0.474411	0
230	11	2014	january	summer	2	08_01_2014	wild	small_birds	Birds	Caprimulgiforme	Caprimulgidae	Hidropsalis_albicollis	Bacurau	45	ESECAE	shoulder	2	08:28:00	223093	8274870	23L	sirgass_2000	08:28:00	1	removed	1	0	0	28.3	16.8	23.1	45.5	5000	four_lane	3	BR_010_BR_020_BR_030	0	0.0186386	0.487844	0	0	0.000810373	0	0.445705	0
231	11	2014	january	summer	2	08_01_2014	wild	small_birds	Birds	Passeriformes	Turdidae	Turdus_rufiventris	Sabia_Laranjeira	74	ESECAE	shoulder	2	08:34:00	220954	8274204	23L	sirgass_2000	08:34:00	1	removed	1	0	0	28.3	16.8	23.1	45.5	5000	four_lane	3	BR_010_BR_020_BR_030	0	0.0153349	0.472962	0	0.0290557	0	0	0.450363	0
232	11	2014	january	summer	2	08_01_2014	wild	small_birds	Birds	Passeriformes	Emberizidae	Volatinia_jacariNA	Tiziu	10	ESECAE	lane	1	08:57:00	212638	8275268	23L	sirgass_2000	08:02:00	48	removed	1	2	0	28.3	16.8	23.1	45.5	2600	two_lane	2	DF_128	0.113893	0.303716	0.279483	0	0.0387722	0	0.0250404	0.170436	0.0355412
233	11	2014	january	summer	2	08_01_2014	wild	small_birds	Birds	Passeriformes	Emberizidae	Volatinia_jacariNA	Tiziu	10	ESECAE	lane	1	09:07:00	215350	8278087	23L	sirgass_2000	09:10:00	24	removed	1	1	0	28.3	16.8	23.1	45.5	2600	two_lane	2	DF_128	0	0.0763607	0.471162	0	0.016247	0.00487409	0	0.177904	0.237206
234	11	2014	january	summer	2	08_01_2014	wild	large_birds	Birds	Tinamiforme	TiNAmidae	Rhynchotus_rufescens	Perdiz	300	PNB	shoulder	2	11:48:00	169253	8258960	23L	sirgass_2000	11:42:00	24	removed	1	1	0	28.3	16.8	23.1	45.5	775	two_lane	2	DF_001	0	0.0396761	0.212146	0.186235	0.0801619	0.106073	0	0.254251	0.097166
235	12	2014	february	summer	2	03_02_2014	wild	small_birds	Birds	Cuculiforme	Cuculidae	Crotophaga_ani	Anu_preto	100	ESECAE	shoulder	2	08:20:00	215572	8273993	23L	sirgass_2000	08:20:00	1	removed	1	0	0	28.2	19.2	23.56	50	5000	four_lane	3	BR_010_BR_020_BR_030	0	0.233144	0.325751	0	0.10723	0	0.235581	0.0138099	0.0528026
236	12	2014	february	summer	2	03_02_2014	wild	small_mammals	Mammals	Rodentia	Cricetidae	Calomys_tener	Rato_silvestre	12	ESECAE	shoulder	2	08:45:00	223945	8275103	23L	sirgass_2000	08:28:00	96	remained	0	4	0	28.2	19.2	23.56	50	5000	four_lane	3	BR_010_BR_020_BR_030	0	0.021827	0.415521	0	0.00646726	0.000808407	0	0.505255	0
237	12	2014	february	summer	2	03_02_2014	domestic	Large_mammals	Mammals	Carnivora	Canidae	Canis_familiaris	Cachorro_Domestico	10000	ESECAE	shoulder	2	08:48:00	224020	8275164	23L	sirgass_2000	08:40:00	96	remained	0	4	0	28.2	19.2	23.56	50	5000	four_lane	3	BR_010_BR_020_BR_030	0	0.0226904	0.4141	0	0.00729335	0.000810373	0	0.504862	0
238	12	2014	february	summer	2	03_02_2014	wild	small_birds	Birds	Passeriformes	NA	NA	Passeriforme	25	ESECAE	lane	1	08:52:00	223625	8275039	23L	sirgass_2000	08:27:00	24	removed	1	1	0	28.2	19.2	23.56	50	5000	four_lane	3	BR_010_BR_020_BR_030	0	0.0226721	0.452632	0	0.00242915	0.000809717	0	0.472065	0
239	12	2014	february	summer	2	03_02_2014	domestic	Large_mammals	Mammals	Carnivora	Canidae	Canis_familiaris	Cachorro_Domestico	10000	ESECAE	shoulder	2	09:05:00	217726	8273910	23L	sirgass_2000	08:44:00	96	remained	0	4	0	28.2	19.2	23.56	50	5000	four_lane	3	BR_010_BR_020_BR_030	0	0.104285	0.582053	0	0.0549717	0	0.126112	0.0897332	0.0105093
240	12	2014	february	summer	2	03_02_2014	wild	large_birds	Birds	Strigiforme	Strigidae	Athene_cunicularia	Coruja_buraqueira	200	ESECAE	shoulder	2	09:25:00	216355	8279121	23L	sirgass_2000	09:01:00	24	removed	1	1	0	28.2	19.2	23.56	50	2600	two_lane	2	DF_128	0	0.0718901	0.493538	0	0.03958	0.00484653	0	0.305331	0.0735057
241	12	2014	february	summer	2	03_02_2014	wild	small_reptiles	Reptile	Squamata	Dipsadidae	Sibynomorphus_mikanii	Jararaquinha_dormideira	150	ESECAE	shoulder	2	09:26:00	216355	8279121	23L	sirgass_2000	09:01:00	24	removed	1	1	0	28.2	19.2	23.56	50	2600	two_lane	2	DF_128	0	0.0718901	0.493538	0	0.03958	0.00484653	0	0.305331	0.0735057
242	12	2014	february	summer	2	03_02_2014	wild	small_birds	Birds	Passeriformes	Emberizidae	Volatinia_jacariNA	Tiziu	10	PNB	lane	1	10:34:00	192893	8263973	23L	sirgass_2000	10:26:00	24	removed	1	1	0	28.2	19.2	23.56	50	775	two_lane	2	DF_001	0.000809717	0.197571	0.31417	0	0.0510121	0.161943	0.108502	0.0663968	0.0526316
243	12	2014	february	summer	2	03_02_2014	wild	small_birds	Birds	Passeriformes	Emberizidae	Volatinia_jacariNA	Tiziu	10	PNB	lane	1	10:50:00	186155	8269173	23L	sirgass_2000	10:41:00	24	removed	1	1	0	28.2	19.2	23.56	50	775	two_lane	2	DF_001	0	0.00567721	0.432279	0	0.0316302	0.0202758	0	0.434712	0.0616383
244	12	2014	february	summer	2	03_02_2014	wild	small_birds	Birds	Passeriformes	NA	NA	Passeriforme	25	PNB	lane	1	10:53:00	185510	8269649	23L	sirgass_2000	10:53:00	1	removed	1	0	0	28.2	19.2	23.56	50	775	two_lane	2	DF_001	0	0.00245098	0.420752	0	0.0424837	0.0196078	0	0.47549	0.0261438
245	12	2014	february	summer	2	03_02_2014	wild	small_birds	Birds	Passeriformes	NA	NA	Passeriforme	25	PNB	lane	1	11:10:00	182273	8272045	23L	sirgass_2000	11:10:00	1	removed	1	0	0	28.2	19.2	23.56	50	775	two_lane	2	DF_001	0	0.0088853	0.383683	0	0.110662	0.0234249	0	0.459612	0
246	12	2014	february	summer	2	03_02_2014	wild	small_birds	Birds	Passeriformes	Emberizidae	Volatinia_jacariNA	Tiziu	10	PNB	lane	1	11:47:00	168762	8264214	23L	sirgass_2000	11:47:00	1	removed	1	0	0	28.2	19.2	23.56	50	775	two_lane	2	DF_001	0	0.128433	0.407916	0	0.0258481	0.0686591	0	0.174475	0.174475
247	12	2014	february	summer	2	03_02_2014	wild	small_birds	Birds	Passeriformes	Emberizidae	Volatinia_jacariNA	Tiziu	10	PNB	lane	1	11:53:00	168834	8263209	23L	sirgass_2000	11:37:00	48	removed	1	2	0	28.2	19.2	23.56	50	775	two_lane	2	DF_001	0	0.13835	0.452265	0	0.0299353	0.0590615	0	0.254045	0.0412621
248	12	2014	february	summer	2	03_02_2014	wild	small_birds	Birds	Passeriformes	Emberizidae	Volatinia_jacariNA	Tiziu	10	PNB	lane	1	11:53:00	168835	8263203	23L	sirgass_2000	11:37:00	48	removed	1	2	0	28.2	19.2	23.56	50	775	two_lane	2	DF_001	0	0.138686	0.451744	0	0.0300081	0.0592052	0	0.253852	0.0413625
249	12	2014	february	summer	2	03_02_2014	wild	small_birds	Birds	Passeriformes	Emberizidae	Volatinia_jacariNA	Tiziu	10	PNB	lane	1	12:05:00	170061	8258097	23L	sirgass_2000	09:56:00	96	remained	0	4	0	28.2	19.2	23.56	50	775	two_lane	2	DF_001	0	0.0330912	0.226796	0.35109	0.121065	0.125101	0	0.11138	0.0112994
250	12	2014	february	summer	2	03_02_2014	wild	small_birds	Birds	Passeriformes	NA	NA	Passeriforme	25	PNB	shoulder	2	12:06:00	170067	8258093	23L	sirgass_2000	12:06:00	1	removed	1	0	0	28.2	19.2	23.56	50	775	two_lane	2	DF_001	0	0.0332792	0.228084	0.352273	0.121753	0.124188	0	0.109578	0.0105519
251	12	2014	february	summer	2	03_02_2014	wild	small_birds	Birds	Passeriformes	Emberizidae	Volatinia_jacariNA	Tiziu	10	IBGE	lane	1	13:52:00	192704	8233511	23L	sirgass_2000	13:52:00	1	removed	1	0	0	28.2	19.2	23.56	50	2000	two_lane	2	BR_251	0	0.092084	0.383683	0	0.0403877	0.03958	0.00807754	0.418417	0.00323102
252	12	2014	february	summer	2	04_02_2014	domestic	medium_mammals	Mammals	Carnivora	Felidae	Felis_catus	Gato_Domestico	5000	ESECAE	lane	1	08:07:00	214733	8274114	23L	sirgass_2000	07:55:00	24	removed	1	1	0	27.8	17.8	22.48	52.5	5000	four_lane	3	BR_010_BR_020_BR_030	0	0.225728	0.325243	0	0.115696	0	0.213592	0.0283172	0.052589
253	12	2014	february	summer	2	04_02_2014	domestic	medium_mammals	Mammals	Carnivora	Felidae	Felis_catus	Gato_Domestico	5000	ESECAE	shoulder	2	08:50:00	213569	8276255	23L	sirgass_2000	08:56:00	72	removed	1	3	0	27.8	17.8	22.48	52.5	2600	two_lane	2	DF_128	0.0177419	0.155645	0.369355	0	0.0443548	0	0	0.28629	0.11129
254	12	2014	february	summer	2	04_02_2014	wild	large_birds	Birds	Strigiforme	Strigidae	Athene_cunicularia	Coruja_buraqueira	200	ESECAE	shoulder	2	09:00:00	216069	8278826	23L	sirgass_2000	09:00:00	1	removed	1	0	0	27.8	17.8	22.48	52.5	2600	two_lane	2	DF_128	0	0.0623482	0.493927	0	0.0226721	0.0048583	0	0.268826	0.133603
255	12	2014	february	summer	2	04_02_2014	wild	small_birds	Birds	Passeriformes	Emberizidae	Volatinia_jacariNA	Tiziu	10	ESECAE	lane	1	09:07:00	218315	8281134	23L	sirgass_2000	09:07:00	1	removed	1	0	0	27.8	17.8	22.48	52.5	2600	two_lane	2	DF_128	0	0.131068	0.433657	0	0.0226537	0.0347896	0	0.347087	0
256	12	2014	february	summer	2	04_02_2014	domestic	medium_mammals	Mammals	Carnivora	Felidae	Felis_catus	Gato_Domestico	5000	ESECAE	lane	1	09:38:00	226916	8279495	23L	sirgass_2000	09:34:00	24	removed	1	1	0	27.8	17.8	22.48	52.5	951	two_lane	2	BR_010_DF_345	0	0.0291262	0.449029	0	0.0412621	0.066343	0	0.38754	0
257	12	2014	february	summer	2	04_02_2014	wild	small_birds	Birds	Passeriformes	Emberizidae	Volatinia_jacariNA	Tiziu	10	PNB	lane	1	10:40:00	186226	8269120	23L	sirgass_2000	10:40:00	1	removed	1	0	0	27.8	17.8	22.48	52.5	775	two_lane	2	DF_001	0	0.00646204	0.432956	0	0.0339257	0.0218094	0	0.427302	0.0646204
258	12	2014	february	summer	2	04_02_2014	wild	small_birds	Birds	Passeriformes	Emberizidae	Volatinia_jacariNA	Tiziu	10	PNB	lane	1	10:45:00	184882	8270110	23L	sirgass_2000	10:43:00	24	removed	1	1	0	27.8	17.8	22.48	52.5	775	two_lane	2	DF_001	0	0.00323625	0.398867	0	0.0671521	0.0186084	0	0.498382	0
259	12	2014	february	summer	2	04_02_2014	wild	small_birds	Birds	Passeriformes	Emberizidae	Volatinia_jacariNA	Tiziu	10	PNB	shoulder	2	11:43:00	169028	8260975	23L	sirgass_2000	11:43:00	1	removed	1	0	0	27.8	17.8	22.48	52.5	775	two_lane	2	DF_001	0	0.102024	0.408907	0	0.0380567	0.0639676	0	0.260729	0.106883
260	12	2014	february	summer	2	05_02_2014	wild	small_birds	Birds	Passeriformes	NA	NA	Passeriforme	25	ESECAE	shoulder	2	08:04:00	219406	8273723	23L	sirgass_2000	08:04:00	24	removed	1	1	0	30	18	23.96	53.25	5000	four_lane	3	BR_010_BR_020_BR_030	0	0.0378727	0.605157	0	0.0451249	0	0.00725222	0.272361	0
261	12	2014	february	summer	2	05_02_2014	wild	small_birds	Birds	Passeriformes	NA	NA	Passeriforme	25	ESECAE	lane	1	08:04:00	219416	8273722	23L	sirgass_2000	08:04:00	1	removed	1	0	0	30	18	23.96	53.25	5000	four_lane	3	BR_010_BR_020_BR_030	0	0.0379032	0.601613	0	0.0451613	0	0.00725806	0.275806	0
262	12	2014	february	summer	2	05_02_2014	wild	small_birds	Birds	Passeriformes	Emberizidae	Volatinia_jacariNA	Tiziu	10	ESECAE	lane	1	08:44:00	212592	8274586	23L	sirgass_2000	08:50:00	48	removed	1	2	0	30	18	23.96	53.25	2600	two_lane	2	DF_128	0.0840744	0.328213	0.232013	0	0.0493129	0.00323363	0.125303	0.0970089	0.039612
263	12	2014	february	summer	2	05_02_2014	wild	small_birds	Birds	Cuculiforme	Cuculidae	Crotophaga_ani	Anu_preto	100	ESECAE	shoulder	2	08:46:00	212549	8274716	23L	sirgass_2000	08:51:00	48	removed	1	2	0	30	18	23.96	53.25	2600	two_lane	2	DF_128	0.101543	0.322502	0.233144	0	0.0471162	0	0.108042	0.109667	0.0365556
264	12	2014	february	summer	2	05_02_2014	wild	small_birds	Birds	Passeriformes	NA	NA	Passeriforme	25	ESECAE	lane	1	09:29:00	227837	8280741	23L	sirgass_2000	08:34:00	48	removed	1	2	0	30	18	23.96	53.25	951	two_lane	2	BR_010_DF_345	0	0.0249597	0.413849	0	0.0144928	0.0152979	0	0.495974	0
265	12	2014	february	summer	2	05_02_2014	wild	small_birds	Birds	Passeriformes	Emberizidae	Volatinia_jacariNA	Tiziu	10	ESECAE	lane	1	09:29:00	227837	8280741	23L	sirgass_2000	08:34:00	48	removed	1	2	0	30	18	23.96	53.25	951	two_lane	2	BR_010_DF_345	0	0.0249597	0.413849	0	0.0144928	0.0152979	0	0.495974	0
266	12	2014	february	summer	2	05_02_2014	wild	small_reptiles	Reptile	Squamata	Amphisbaenidae	AmphisbaeNA_alba	Cobra_de_duas_cabeças	25	ESECAE	lane	1	09:45:00	224120	8275559	23L	sirgass_2000	09:34:00	24	removed	1	1	0	30	18	23.96	53.25	951	two_lane	2	BR_010_DF_345	0	0.0235772	0.48374	0	0.00487805	0.000813008	0	0.438211	0
267	12	2014	february	summer	2	05_02_2014	wild	small_birds	Birds	Passeriformes	Emberizidae	Volatinia_jacariNA	Tiziu	10	PNB	lane	1	10:24:00	191908	8264817	23L	sirgass_2000	10:24:00	1	removed	1	0	0	30	18	23.96	53.25	775	two_lane	2	DF_001	0	0.0573506	0.552504	0	0.0484653	0.222132	0.00807754	0.0775444	0.0145396
268	12	2014	february	summer	2	05_02_2014	wild	small_birds	Birds	Passeriformes	Emberizidae	Volatinia_jacariNA	Tiziu	10	PNB	lane	1	10:29:00	191049	8265553	23L	sirgass_2000	10:29:00	1	removed	1	0	0	30	18	23.96	53.25	775	two_lane	2	DF_001	0.0016116	0.0265915	0.680902	0	0.0547945	0.192587	0.0177276	0.0136986	0
269	12	2014	february	summer	2	05_02_2014	wild	small_birds	Birds	Apodiforme	Trochilidae	NA	Beija_flor	8	PNB	lane	1	10:54:00	182783	8271656	23L	sirgass_2000	09:31:00	48	removed	1	2	0	30	18	23.96	53.25	775	two_lane	2	DF_001	0	0.00644122	0.379227	0	0.111111	0.0161031	0	0.47343	0
270	12	2014	february	summer	2	05_02_2014	wild	small_birds	Birds	Passeriformes	Emberizidae	Volatinia_jacariNA	Tiziu	10	PNB	lane	1	10:57:00	182131	8272154	23L	sirgass_2000	09:33:00	48	removed	1	2	0	30	18	23.96	53.25	775	two_lane	2	DF_001	0	0.00886382	0.385173	0	0.110395	0.0265915	0	0.455278	0
271	12	2014	february	summer	2	05_02_2014	wild	small_birds	Birds	Passeriformes	NA	NA	Passeriforme	25	FAL	shoulder	2	14:37:00	188663	8231627	23L	sirgass_2000	14:37:00	1	removed	1	0	0	30	18	23.96	53.25	2000	two_lane	2	BR_251	0	0.0275527	0.91248	0	0.0113452	0.0105348	0	0.0251216	0
272	12	2014	february	summer	2	05_02_2014	wild	small_birds	Birds	Passeriformes	Emberizidae	Volatinia_jacariNA	Tiziu	10	IBGE	lane	1	14:49:00	193670	8234377	23L	sirgass_2000	13:47:00	24	removed	1	1	0	30	18	23.96	53.25	2000	two_lane	2	BR_251	0	0.123077	0.435628	0	0.0502024	0.0121457	0.00728745	0.315789	0.0356275
273	12	2014	february	summer	2	05_02_2014	wild	small_birds	Birds	Passeriformes	Emberizidae	Volatinia_jacariNA	Tiziu	10	IBGE	lane	1	14:52:00	193998	8234611	23L	sirgass_2000	13:48:00	24	removed	1	1	0	30	18	23.96	53.25	2000	two_lane	2	BR_251	0	0.133387	0.437348	0	0.0412288	0.00808407	0.00323363	0.318513	0.0355699
274	12	2014	february	summer	2	05_02_2014	wild	small_birds	Birds	Passeriformes	Emberizidae	Volatinia_jacariNA	Tiziu	10	JBB	shoulder	2	15:26:00	197425	8238193	23L	sirgass_2000	15:06:00	1	removed	1	0	0	30	18	23.96	53.25	7000	four_lane	3	DF_001	0	0.14228	0.754244	0	0.0363783	0.017785	0	0.0282943	0
275	12	2014	february	summer	2	05_02_2014	wild	small_birds	Birds	Passeriformes	NA	NA	Passeriforme	25	JBB	shoulder	2	15:28:00	197505	8238342	23L	sirgass_2000	15:08:00	1	removed	1	0	0	30	18	23.96	53.25	7000	four_lane	3	DF_001	0	0.158537	0.747967	0	0.0349593	0.0154472	0	0.0203252	0
276	12	2014	february	summer	2	05_02_2014	wild	small_birds	Birds	Passeriformes	Emberizidae	Volatinia_jacariNA	Tiziu	10	JBB	shoulder	2	15:11:00	197880	8239089	23L	sirgass_2000	15:11:00	1	removed	1	0	0	30	18	23.96	53.25	7000	four_lane	3	DF_001	0	0.169766	0.656427	0	0.0153597	0.0210186	0	0.115602	0
277	13	2014	march	summer	2	10_03_2014	wild	small_birds	Birds	Passeriformes	Emberizidae	Volatinia_jacariNA	Tiziu	10	ESECAE	shoulder	2	07:59:00	222300	8274591	23L	sirgass_2000	00:00:00	1	removed	1	0	73.7	27.5	16.3	22.02	73.5	5000	four_lane	3	BR_010_BR_020_BR_030	0	0.00484653	0.478191	0	0	0	0	0.479806	0
278	13	2014	march	summer	2	10_03_2014	wild	large_birds	Birds	Psittaciformes	Psittacidae	Amazona_sp.	Papagaio	400	ESECAE	shoulder	2	08:08:00	223251	8274919	23L	sirgass_2000	08:23:00	72	removed	1	3	73.7	27.5	16.3	22.02	73.5	5000	four_lane	3	BR_010_BR_020_BR_030	0	0.0202265	0.482201	0	0	0.000809061	0	0.449029	0
279	13	2014	march	summer	2	10_03_2014	wild	small_birds	Birds	Passeriformes	Emberizidae	Volatinia_jacariNA	Tiziu	10	ESECAE	shoulder	2	08:41:00	215076	8277800	23L	sirgass_2000	08:41:00	1	removed	1	0	73.7	27.5	16.3	22.02	73.5	2600	two_lane	2	DF_128	0	0.0807754	0.46042	0	0.0129241	0.00484653	0	0.18336	0.241519
280	13	2014	march	summer	2	10_03_2014	wild	small_birds	Birds	Passeriformes	Emberizidae	Volatinia_jacariNA	Tiziu	10	ESECAE	shoulder	2	09:21:00	224874	8276723	23L	sirgass_2000	09:21:00	1	removed	1	0	73.7	27.5	16.3	22.02	73.5	951	two_lane	2	BR_010_DF_345	0	0.0194805	0.527597	0	0.000811688	0.000811688	0	0.401786	0
281	13	2014	march	summer	2	10_03_2014	wild	small_birds	Birds	Passeriformes	Emberizidae	Volatinia_jacariNA	Tiziu	10	PNB	shoulder	2	10:00:00	187122	8268461	23L	sirgass_2000	10:00:00	1	removed	1	0	73.7	27.5	16.3	22.02	73.5	775	two_lane	2	DF_001	0	0.0137987	0.558442	0	0.0251623	0.00568182	0	0.314123	0.0681818
282	13	2014	march	summer	2	10_03_2014	wild	small_birds	Birds	Passeriformes	Emberizidae	Volatinia_jacariNA	Tiziu	10	PNB	shoulder	2	10:22:00	180630	8273293	23L	sirgass_2000	10:22:00	1	removed	1	0	73.7	27.5	16.3	22.02	73.5	775	two_lane	2	DF_001	0	0.109223	0.424757	0	0.0711974	0.0161812	0	0.364887	0
283	13	2014	march	summer	2	10_03_2014	wild	Large_reptiles	Reptile	Squamata	Boidae	Boa_constrictor	jiboia	4000	PNB	shoulder	2	10:59:00	169054	8260628	23L	sirgass_2000	09:40:00	96	remained	0	4	73.7	27.5	16.3	22.02	73.5	775	two_lane	2	DF_001	0	0.0890688	0.361943	0	0.0566802	0.0898785	0	0.270445	0.11336
284	13	2014	march	summer	2	10_03_2014	wild	large_birds	Birds	Tinamiforme	TiNAmidae	Rhynchotus_rufescens	Perdiz	300	PNB	shoulder	2	11:05:00	169545	8258476	23L	sirgass_2000	11:41:00	24	removed	1	1	73.7	27.5	16.3	22.02	73.5	775	two_lane	2	DF_001	0	0.0307443	0.202265	0.288835	0.10356	0.107605	0	0.186893	0.0598706
285	13	2014	march	summer	2	10_03_2014	wild	small_reptiles	Reptile	Squamata	Dipsadidae	Oxyrhopus_sp	Coral_falsa	80	PNB	lane	1	11:13:00	172700	8257111	23L	sirgass_2000	11:13:00	1	removed	1	0	73.7	27.5	16.3	22.02	73.5	8000	two_lane	2	DF_001	0	0.0315534	0.547735	0.114887	0.0501618	0.21521	0	0.026699	0
286	13	2014	march	summer	2	10_03_2014	wild	small_birds	Birds	Passeriformes	Emberizidae	Volatinia_jacariNA	Tiziu	10	PNB	lane	1	11:18:00	173278	8256233	23L	sirgass_2000	11:49:00	24	removed	1	1	73.7	27.5	16.3	22.02	73.5	8000	two_lane	2	DF_001	0	0.0379951	0.488278	0.116411	0.0404204	0.137429	0	0.163298	0
287	13	2014	march	summer	2	10_03_2014	domestic	medium_mammals	Mammals	Carnivora	Felidae	Felis_catus	Gato_Domestico	5000	FAL	shoulder	2	13:02:00	188765	8231662	23L	sirgass_2000	10:39:00	96	remained	0	4	73.7	27.5	16.3	22.02	73.5	2000	two_lane	2	BR_251	0	0.028363	0.903566	0	0.012966	0.0113452	0	0.0316045	0
288	13	2014	march	summer	2	10_03_2014	wild	small_birds	Birds	Passeriformes	Emberizidae	Volatinia_jacariNA	Tiziu	10	JBB	shoulder	2	13:22:00	197767	8238835	23L	sirgass_2000	13:22:00	1	removed	1	0	73.7	27.5	16.3	22.02	73.5	7000	four_lane	3	DF_001	0	0.173808	0.692805	0	0.0226354	0.0210186	0	0.0670978	0
289	13	2014	march	summer	2	10_03_2014	wild	small_birds	Birds	Passeriformes	Emberizidae	Volatinia_jacariNA	Tiziu	10	JBB	shoulder	2	13:24:00	197867	8239046	23L	sirgass_2000	13:24:00	1	removed	1	0	73.7	27.5	16.3	22.02	73.5	7000	four_lane	3	DF_001	0	0.169766	0.664511	0	0.0169766	0.0210186	0	0.105093	0
290	13	2014	march	summer	2	11_03_2014	wild	small_reptiles	Reptile	Squamata	Amphisbaenidae	AmphisbaeNA_alba	Cobra_de_duas_cabeças	25	ESECAE	shoulder	2	08:20:00	217786	8273869	23L	sirgass_2000	07:46:00	24	removed	1	1	0	27.2	17.5	21.92	71	5000	four_lane	3	BR_010_BR_020_BR_030	0	0.102834	0.581377	0	0.0574899	0	0.122267	0.0963563	0.00728745
291	13	2014	march	summer	2	11_03_2014	wild	small_birds	Birds	Passeriformes	Emberizidae	Volatinia_jacariNA	Tiziu	10	ESECAE	lane	1	08:31:00	223644	8275011	23L	sirgass_2000	08:00:00	24	removed	1	1	0	27.2	17.5	21.92	71	5000	four_lane	3	BR_010_BR_020_BR_030	0	0.0227457	0.444354	0	0.00324939	0.000812348	0	0.479285	0
292	13	2014	march	summer	2	11_03_2014	wild	small_reptiles	Reptile	Squamata	Dipsadidae	Oxyrhopus_guibei	Coral_falsa	80	ESECAE	shoulder	2	08:41:00	221517	8274378	23L	sirgass_2000	08:41:00	1	removed	1	0	0	27.2	17.5	21.92	71	5000	four_lane	3	BR_010_BR_020_BR_030	0	0.00885668	0.471014	0	0.0120773	0	0	0.475845	0
293	13	2014	march	summer	2	11_03_2014	domestic	Large_mammals	Mammals	Carnivora	Canidae	Canis_familiaris	Cachorro_Domestico	10000	ESECAE	shoulder	2	08:58:00	214062	8274106	23L	sirgass_2000	08:38:00	48	removed	1	2	0	27.2	17.5	21.92	71	5000	four_lane	3	BR_010_BR_020_BR_030	0	0.249194	0.328226	0	0.101613	0.00564516	0.187903	0.0314516	0.0483871
294	13	2014	march	summer	2	11_03_2014	wild	Large_reptiles	Reptile	Squamata	Viperidae	Bothrops_sp.	Cascavel	550	ESECAE	shoulder	2	09:19:00	216401	8279167	23L	sirgass_2000	08:59:00	48	removed	1	2	0	27.2	17.5	21.92	71	2600	two_lane	2	DF_128	0	0.0711399	0.494745	0	0.0428456	0.00485044	0	0.311237	0.0638642
295	13	2014	march	summer	2	11_03_2014	wild	large_birds	Birds	Strigiforme	Strigidae	Athene_cunicularia	Coruja_buraqueira	200	PNB	lane	1	10:49:00	182850	8271603	23L	sirgass_2000	10:16:00	24	removed	1	1	0	27.2	17.5	21.92	71	775	two_lane	2	DF_001	0	0.00645682	0.379338	0	0.112994	0.0145278	0	0.472962	0
296	13	2014	march	summer	2	11_03_2014	domestic	Large_mammals	Mammals	Carnivora	Canidae	Canis_familiaris	Cachorro_Domestico	10000	PNB	lane	1	11:38:00	169198	8259158	23L	sirgass_2000	11:38:00	1	removed	1	0	0	27.2	17.5	21.92	71	775	two_lane	2	DF_001	0	0.0390244	0.222764	0.137398	0.0837398	0.110569	0	0.277236	0.106504
297	13	2014	march	summer	2	12_03_2014	wild	small_reptiles	Reptile	Squamata	Amphisbaenidae	AmphisbaeNA_alba	Cobra_de_duas_cabeças	25	ESECAE	lane	1	07:50:00	218586	8273795	23L	sirgass_2000	00:00:00	48	removed	1	2	11	27.6	17.8	22.8	62.5	5000	four_lane	3	BR_010_BR_020_BR_030	0	0.0574434	0.651294	0	0.0493528	0	0.038835	0.170712	0
298	13	2014	march	summer	2	12_03_2014	wild	medium_mammals	Mammals	Carnivora	Mustelidae	Galictis_cuja	Furao	1600	ESECAE	lane	1	08:33:00	212532	8274845	23L	sirgass_2000	08:39:00	48	removed	1	2	11	27.6	17.8	22.8	62.5	2600	two_lane	2	DF_128	0.111111	0.31562	0.243156	0	0.047504	0	0.0861514	0.119163	0.0362319
299	13	2014	march	summer	2	12_03_2014	wild	small_birds	Birds	Passeriformes	Emberizidae	Volatinia_jacariNA	Tiziu	10	PNB	lane	1	10:56:00	169085	8260306	23L	sirgass_2000	10:56:00	1	removed	1	0	11	27.6	17.8	22.8	62.5	775	two_lane	2	DF_001	0	0.0736842	0.319028	0	0.0785425	0.108502	0	0.28583	0.116599
300	13	2014	march	summer	2	12_03_2014	wild	small_reptiles	Reptile	Squamata	Amphisbaenidae	AmphisbaeNA_alba	Cobra_de_duas_cabeças	25	PNB	lane	1	11:08:00	170464	8257872	23L	sirgass_2000	11:08:00	1	removed	1	0	11	27.6	17.8	22.8	62.5	8000	two_lane	2	DF_001	0	0.0356564	0.258509	0.349271	0.12966	0.147488	0	0.0615883	0
301	13	2014	march	summer	2	12_03_2014	wild	small_birds	Birds	Passeriformes	Emberizidae	Volatinia_jacariNA	Tiziu	10	IBGE	shoulder	2	13:00:00	193034	8233798	23L	sirgass_2000	10:44:00	48	removed	1	2	11	27.6	17.8	22.8	62.5	2000	two_lane	2	BR_251	0	0.0940032	0.41329	0	0.0437601	0.0218801	0.00810373	0.377634	0.0243112
302	14	2014	april	autumn	3	07_04_2014	wild	small_birds	Birds	NA	NA	NA	Ave_silvestre	NA	IBGE	lane	1	08:25:00	193309	8234061	23L	sirgass_2000	08:38:00	48	removed	1	2	0	29.3	18	22.88	75.5	2000	two_lane	2	BR_251	0	0.103728	0.426256	0	0.0510535	0.0153971	0.00810373	0.341167	0.0340357
303	14	2014	april	autumn	3	07_04_2014	wild	large_birds	Birds	Strigiforme	Strigidae	Athene_cunicularia	Coruja_buraqueira	200	FAL	shoulder	2	08:30:00	190462	8232344	23L	sirgass_2000	08:25:00	96	remained	0	4	0	29.3	18	22.88	75.5	2000	two_lane	2	BR_251	0	0.052589	0.619741	0	0.0558252	0.0283172	0	0.231392	0
304	14	2014	april	autumn	3	07_04_2014	wild	small_mammals	Mammals	Didelphimorphia	Didelphidae	Didelphis_albiventris	Gamba_ou_Sarue_	900	FAL	shoulder	2	08:45:00	183429	8231165	23L	sirgass_2000	08:45:00	1	removed	1	0	0	29.3	18	22.88	75.5	2000	two_lane	2	BR_251	0.0016129	0.0346774	0.654839	0	0.0903226	0.0483871	0.016129	0.114516	0
305	14	2014	april	autumn	3	07_04_2014	wild	small_mammals	Mammals	Didelphimorphia	Didelphidae	Didelphis_albiventris	Gamba_ou_Sarue_	900	PNB	lane	1	09:27:00	173050	8252203	23L	sirgass_2000	09:18:00	96	remained	0	4	0	29.3	18	22.88	75.5	8000	two_lane	2	DF_001	0	0.186441	0.151735	0.11703	0.0274415	0.0984665	0.265537	0.0936239	0.00887813
306	14	2014	april	autumn	3	07_04_2014	domestic	medium_mammals	Mammals	Carnivora	Felidae	Felis_catus	Gato_Domestico	5000	PNB	lane	1	09:45:00	168929	8262241	23L	sirgass_2000	09:51:00	24	removed	1	1	0	29.3	18	22.88	75.5	775	two_lane	2	DF_001	0	0.125806	0.483065	0	0.0427419	0.0532258	0	0.272581	0
307	14	2014	april	autumn	3	07_04_2014	wild	small_reptiles	Reptile	Squamata	Dipsadidae	Oxyrhopus_sp	Coral_falsa	80	PNB	shoulder	2	10:25:00	183336	8271236	23L	sirgass_2000	10:37:00	48	removed	1	2	0	29.3	18	22.88	75.5	775	two_lane	2	DF_001	0	0.00322841	0.374496	0	0.113801	0.0129136	0	0.48184	0
308	14	2014	april	autumn	3	07_04_2014	domestic	medium_mammals	Mammals	Carnivora	Felidae	Felis_catus	Gato_Domestico	5000	PNB	lane	1	10:45:00	184485	8270388	23L	sirgass_2000	10:47:00	48	removed	1	2	0	29.3	18	22.88	75.5	775	two_lane	2	DF_001	0	0.00242718	0.381068	0	0.0865696	0.02589	0	0.490291	0
309	14	2014	april	autumn	3	07_04_2014	domestic	Large_mammals	Mammals	Carnivora	Canidae	Canis_familiaris	Cachorro_Domestico	10000	PNB	lane	1	10:47:00	184609	8270297	23L	sirgass_2000	09:48:00	96	remained	0	4	0	29.3	18	22.88	75.5	775	two_lane	2	DF_001	0	0.00241935	0.385484	0	0.0822581	0.0225806	0	0.494355	0
310	14	2014	april	autumn	3	07_04_2014	wild	small_birds	Birds	Passeriformes	Emberizidae	Volatinia_jacariNA	Tiziu	10	PNB	shoulder	2	10:52:00	186309	8269052	23L	sirgass_2000	10:51:00	48	removed	1	2	0	29.3	18	22.88	75.5	775	two_lane	2	DF_001	0	0.00735294	0.435458	0	0.0343137	0.0228758	0	0.419118	0.0669935
311	14	2014	april	autumn	3	07_04_2014	domestic	Large_mammals	Mammals	Carnivora	Canidae	Canis_familiaris	Cachorro_Domestico	10000	ESECAE	shoulder	2	11:45:00	222790	8274774	23L	sirgass_2000	11:37:00	48	removed	1	2	0	29.3	18	22.88	75.5	5000	four_lane	3	BR_010_BR_020_BR_030	0	0.0121359	0.490291	0	0	0.000809061	0	0.451456	0
312	14	2014	april	autumn	3	07_04_2014	wild	small_birds	Birds	Caprimulgiforme	Caprimulgidae	Hidropsalis_albicollis	Bacurau	45	ESECAE	lane	1	11:50:00	220542	8274074	23L	sirgass_2000	11:50:00	1	removed	1	0	0	29.3	18	22.88	75.5	5000	four_lane	3	BR_010_BR_020_BR_030	0	0.0259109	0.481781	0	0.0380567	0	0	0.422672	0
313	14	2014	april	autumn	3	07_04_2014	wild	small_reptiles	Reptile	Squamata	Amphisbaenidae	AmphisbaeNA_alba	Cobra_de_duas_cabeças	25	ESECAE	shoulder	2	11:56:00	218047	8273880	23L	sirgass_2000	11:37:00	24	removed	1	1	0	29.3	18	22.88	75.5	5000	four_lane	3	BR_010_BR_020_BR_030	0	0.0906149	0.613269	0	0.0566343	0	0.0898058	0.118123	0
314	14	2014	april	autumn	3	07_04_2014	wild	small_birds	Birds	Passeriformes	NA	NA	Passeriforme	25	ESECAE	shoulder	2	12:06:00	213951	8274082	23L	sirgass_2000	10:20:00	96	remained	0	4	0	29.3	18	22.88	75.5	5000	four_lane	3	BR_010_BR_020_BR_030	0	0.262945	0.316343	0	0.0987055	0.00728155	0.187702	0.0355987	0.0436893
315	14	2014	april	autumn	3	07_04_2014	wild	small_reptiles	Reptile	Squamata	Amphisbaenidae	AmphisbaeNA_alba	Cobra_de_duas_cabeças	25	ESECAE	lane	1	12:16:00	214738	8277452	23L	sirgass_2000	12:16:00	1	removed	1	0	0	29.3	18	22.88	75.5	2600	two_lane	2	DF_128	0	0.082391	0.441842	0	0.0113086	0.00484653	0	0.219709	0.226171
316	14	2014	april	autumn	3	07_04_2014	wild	small_reptiles	Reptile	Squamata	Amphisbaenidae	AmphisbaeNA_alba	Cobra_de_duas_cabeças	25	ESECAE	shoulder	2	12:18:00	215142	8277868	23L	sirgass_2000	12:18:00	1	removed	1	0	0	29.3	18	22.88	75.5	2600	two_lane	2	DF_128	0	0.0791599	0.462036	0	0.0153473	0.00484653	0	0.180129	0.242326
317	14	2014	april	autumn	3	07_04_2014	wild	small_reptiles	Reptile	Squamata	Amphisbaenidae	AmphisbaeNA_alba	Cobra_de_duas_cabeças	25	ESECAE	shoulder	2	12:20:00	215463	8278197	23L	sirgass_2000	12:20:00	1	removed	1	0	0	29.3	18	22.88	75.5	2600	two_lane	2	DF_128	0	0.0750605	0.478612	0	0.0169492	0.00484262	0	0.180791	0.227603
318	14	2014	april	autumn	3	07_04_2014	wild	large_birds	Birds	Strigiforme	Strigidae	Athene_cunicularia	Coruja_buraqueira	200	ESECAE	shoulder	2	12:22:00	216068	8278820	23L	sirgass_2000	10:26:00	96	remained	0	4	0	29.3	18	22.88	75.5	2600	two_lane	2	DF_128	0	0.0622474	0.494745	0	0.0226354	0.00485044	0	0.268391	0.133387
319	14	2014	april	autumn	3	07_04_2014	wild	Large_reptiles	Reptile	Squamata	Dipsadidae	Pseudoboa_nigra	Cobra_Preta	180	ESECAE	shoulder	2	12:36:00	220836	8282025	23L	sirgass_2000	12:09:00	24	removed	1	1	0	29.3	18	22.88	75.5	33	dirt_road	1	DF_205	0	0.126016	0.537398	0	0.0479675	0.0146341	0	0.250407	0.00650407
320	14	2014	april	autumn	3	08_04_2014	wild	small_birds	Birds	Passeriformes	NA	NA	Passeriforme	25	IBGE	lane	1	08:19:00	195829	8236317	23L	sirgass_2000	08:19:00	1	removed	1	0	5.8	28	19	22.06	79.5	2000	two_lane	2	DF_001	0	0.118027	0.575586	0	0.0161681	0.00646726	0.0250606	0.221504	0.000808407
321	14	2014	april	autumn	3	08_04_2014	wild	small_birds	Birds	Passeriformes	Emberizidae	Zonotrichia_capensis	Tico_tico	16	PNB	lane	1	09:45:00	169263	8258957	23L	sirgass_2000	09:45:00	1	removed	1	0	5.8	28	19	22.06	79.5	775	two_lane	2	DF_001	0	0.039612	0.211803	0.186742	0.0808407	0.105901	0	0.25384	0.0970089
322	14	2014	april	autumn	3	09_04_2014	wild	small_birds	Birds	Passeriformes	Emberizidae	Zonotrichia_capensis	Tico_tico	16	IBGE	shoulder	2	08:30:00	195555	8236070	23L	sirgass_2000	08:30:00	1	removed	1	0	0	28.6	19	21.98	77	2000	two_lane	2	DF_001	0	0.132198	0.532847	0	0.0170316	0.00729927	0.0356853	0.226277	0.0137875
323	14	2014	april	autumn	3	09_04_2014	domestic	Large_mammals	Mammals	Carnivora	Canidae	Canis_familiaris	Cachorro_Domestico	10000	PNB	lane	1	10:30:00	179921	8273821	23L	sirgass_2000	10:28:00	24	removed	1	1	0	28.6	19	21.98	77	775	two_lane	2	DF_001	0	0.108152	0.4318	0	0.0637611	0.0112994	0	0.371267	0
324	14	2014	april	autumn	3	09_04_2014	wild	Large_reptiles	Reptile	Squamata	Dipsadidae	Pseudoboa_nigra	BoiruNA_maculata	180	ESECAE	shoulder	2	12:00:00	215795	8278534	23L	sirgass_2000	11:50:00	24	removed	1	1	0	28.6	19	21.98	77	2600	two_lane	2	DF_128	0	0.0615883	0.491896	0	0.0170178	0.00486224	0	0.220421	0.188006
325	14	2014	april	autumn	3	09_04_2014	wild	small_birds	Birds	Passeriformes	NA	NA	Passeriforme	25	ESECAE	shoulder	2	12:30:00	227271	8279971	23L	sirgass_2000	12:30:00	1	removed	1	0	0	28.6	19	21.98	77	951	two_lane	2	BR_010_DF_345	0	0.0299111	0.450283	0	0.0282943	0.0662894	0	0.399353	0
326	14	2014	april	autumn	3	09_04_2014	domestic	Large_mammals	Mammals	Carnivora	Canidae	Canis_familiaris	Cachorro_Domestico	10000	ESECAE	shoulder	2	12:41:00	223849	8275105	23L	sirgass_2000	10:15:00	48	removed	1	2	0	28.6	19	21.98	77	5000	four_lane	3	BR_010_BR_020_BR_030	0	0.0217918	0.432607	0	0.00645682	0.000807103	0	0.489104	0
327	15	2014	may	autumn	3	12_05_2014	domestic	medium_mammals	Mammals	Carnivora	Felidae	Felis_catus	Gato_Domestico	5000	ESECAE	shoulder	2	09:13:00	213561	8276244	23L	sirgass_2000	08:41:00	24	removed	1	1	0	24.2	15.7	19.3	67.5	2600	two_lane	2	DF_128	0.0178138	0.156275	0.369231	0	0.0445344	0	0	0.28664	0.110121
328	15	2014	may	autumn	3	12_05_2014	wild	small_birds	Birds	Passeriformes	NA	NA	Passeriforme	25	ESECAE	lane	1	09:15:00	213834	8276519	23L	sirgass_2000	09:15:00	1	removed	1	0	0	24.2	15.7	19.3	67.5	2600	two_lane	2	DF_128	0.000809717	0.110931	0.40081	0	0.0331984	0	0	0.28664	0.151417
329	15	2014	may	autumn	3	12_05_2014	wild	small_birds	Birds	Cuculiforme	Cuculidae	Guira_guira	Anu_branco	100	ESECAE	shoulder	2	08:23:00	216150	8278857	23L	sirgass_2000	08:23:00	96	remained	0	4	0	24.2	15.7	19.3	67.5	2600	two_lane	2	DF_128	0	0.0646204	0.508885	0	0.0234249	0.00484653	0	0.268982	0.115509
330	15	2014	may	autumn	3	12_05_2014	wild	small_reptiles	Reptile	Squamata	Dipsadidae	Oxyrhopus_sp	Coral_falsa	80	ESECAE	shoulder	2	09:28:00	218036	8280846	23L	sirgass_2000	09:28:00	1	removed	1	0	0	24.2	15.7	19.3	67.5	2600	two_lane	2	DF_128	0	0.118262	0.448914	0	0.0273532	0.0362027	0	0.341915	0
331	15	2014	may	autumn	3	12_05_2014	domestic	large_birds	Ave	Galliforme	Phasianidae	Gallus_gallus_domesticus	Galinha	1500	ESECAE	shoulder	2	09:35:00	219819	8281750	23L	sirgass_2000	08:34:00	96	remained	0	4	0	24.2	15.7	19.3	67.5	33	dirt_road	1	DF_205	0	0.119125	0.487034	0	0.0316045	0.0259319	0	0.292545	0.0137763
332	15	2014	may	autumn	3	12_05_2014	domestic	medium_mammals	Mammals	Carnivora	Felidae	Felis_catus	Gato_Domestico	5000	PNB	shoulder	2	11:12:00	174531	8272954	23L	sirgass_2000	09:20:00	96	remained	0	4	0	24.2	15.7	19.3	67.5	775	dirt_road	1	DF_001	0	0.0902498	0.382756	0	0.0491539	0.270749	0	0.0499597	0.147462
333	15	2014	may	autumn	3	12_05_2014	domestic	Large_mammals	Mammals	Carnivora	Canidae	Canis_familiaris	Cachorro_Domestico	10000	PNB	shoulder	2	11:37:00	169109	8260048	23L	sirgass_2000	11:37:00	1	removed	1	0	0	24.2	15.7	19.3	67.5	775	two_lane	2	DF_001	0	0.0629085	0.291667	0	0.0898693	0.115196	0	0.302288	0.118464
334	15	2014	may	autumn	3	12_05_2014	wild	medium_mammals	Mammals	Carnivora	Mephitidae	Conepatus_semistriatus	Jaritataca	3400	IBGE	shoulder	2	12:50:00	191439	8232712	23L	sirgass_2000	09:43:00	96	remained	0	4	0	24.2	15.7	19.3	67.5	2000	two_lane	2	BR_251	0	0.0873786	0.432039	0	0.0550162	0.0469256	0.00323625	0.36246	0
335	15	2014	may	autumn	3	12_05_2014	wild	small_mammals	Mammals	Didelphimorphia	Didelphidae	Didelphis_albiventris	Gamba_ou_Sarue_	900	JBB	shoulder	2	13:09:00	197970	8241100	23L	sirgass_2000	09:53:00	96	remained	0	4	0	24.2	15.7	19.3	67.5	7000	four_lane	3	DF_001	0	0.079096	0.4318	0	0.0145278	0.0290557	0.185634	0.229217	0
336	15	2014	may	autumn	3	13_05_2014	wild	small_birds	Birds	Passeriformes	NA	NA	Passeriforme	25	ESECAE	lane	1	08:36:00	212737	8274328	23L	sirgass_2000	08:36:00	1	removed	1	0	0	24.6	15.2	18.96	61.5	2600	two_lane	2	DF_128	0.0414634	0.349593	0.227642	0	0.0617886	0.0146341	0.14878	0.0699187	0.0406504
337	15	2014	may	autumn	3	13_05_2014	wild	small_birds	Birds	Passeriformes	Emberizidae	Volatinia_jacariNA	Tiziu	10	PNB	lane	1	10:10:00	178776	8274700	23L	sirgass_2000	10:10:00	1	removed	1	0	0	24.6	15.2	18.96	61.5	775	two_lane	2	DF_001	0	0.0476575	0.415994	0	0.0436187	0.00565428	0	0.473344	0
338	15	2014	may	autumn	3	13_05_2014	wild	large_birds	Birds	Strigiforme	Strigidae	Athene_cunicularia	Coruja_buraqueira	200	FAL	lane	1	11:36:00	190948	8232521	23L	sirgass_2000	11:36:00	1	removed	1	0	0	24.6	15.2	18.96	61.5	2000	two_lane	2	BR_251	0	0.066343	0.517799	0	0.0582524	0.0412621	0	0.303398	0
339	15	2014	may	autumn	3	14_05_2014	wild	small_reptiles	Reptile	Squamata	Dipsadidae	Oxyrhopus_sp	Coral_falsa	80	ESECAE	shoulder	2	08:54:00	214218	8274131	23L	sirgass_2000	08:11:00	48	removed	1	2	0	25.2	13.2	19.16	52.75	5000	four_lane	3	BR_010_BR_020_BR_030	0	0.2361	0.340048	0	0.103143	0.00402901	0.190169	0.0290089	0.0507655
340	15	2014	may	autumn	3	14_05_2014	wild	small_reptiles	Reptile	Squamata	Dipsadidae	Oxyrhopus_guibei	Coral_falsa	80	ESECAE	shoulder	2	09:13:00	215532	8278270	23L	sirgass_2000	09:13:00	1	removed	1	0	0	25.2	13.2	19.16	52.75	2600	two_lane	2	DF_128	0	0.0720648	0.480162	0	0.017004	0.0048583	0	0.188664	0.221053
341	15	2014	may	autumn	3	14_05_2014	wild	large_birds	Birds	Accipitriformes	Accipitridae	Rupornis_magnirostris	Gaviao_carijo	300	ESECAE	shoulder	2	09:48:00	227740	8280610	23L	sirgass_2000	09:48:00	1	removed	1	0	0	25.2	13.2	19.16	52.75	951	two_lane	2	BR_010_DF_345	0	0.025869	0.438965	0	0.0145513	0.025869	0	0.467259	0
342	15	2014	may	autumn	3	14_05_2014	wild	small_birds	Birds	Passeriformes	Emberizidae	Volatinia_jacariNA	Tiziu	10	PNB	shoulder	2	10:57:00	178052	8275251	23L	sirgass_2000	10:57:00	1	removed	1	0	0	25.2	13.2	19.16	52.75	775	two_lane	2	DF_001	0	0.0483871	0.341129	0	0.00967742	0.00725806	0	0.568548	0.00806452
343	15	2014	may	autumn	3	14_05_2014	wild	small_birds	Birds	Passeriformes	NA	NA	Passeriforme	25	IBGE	lane	1	13:43:00	193600	8234305	23L	sirgass_2000	00:00:00	1	removed	1	0	0	25.2	13.2	19.16	52.75	2000	two_lane	2	BR_251	0	0.119935	0.431929	0	0.0502431	0.012966	0.00729335	0.321718	0.0356564
344	16	2014	june	autumn	3	02_06_2014	wild	small_mammals	Mammals	Didelphimorphia	Didelphidae	Didelphis_albiventris	Gamba_ou_Sarue_	900	JBB	shoulder	2	08:10:00	197958	8241135	23L	sirgass_2000	08:55:00	96	remained	0	4	0	25.2	17.2	19.88	68.75	7000	four_lane	3	DF_001	0	0.0737439	0.43436	0	0.0170178	0.0291734	0.190438	0.224473	0
345	16	2014	june	autumn	3	02_06_2014	wild	small_birds	Birds	Passeriformes	Thraupidae	Lanio_pileatus	Tico_tico_rei_cinza	16	JBB	lane	1	08:20:00	196302	8236743	23L	sirgass_2000	08:32:00	1	removed	1	0	0	25.2	17.2	19.88	68.75	2000	two_lane	2	DF_001	0	0.0876623	0.646104	0	0.0137987	0.0146104	0.00811688	0.198864	0
346	16	2014	june	autumn	3	02_06_2014	wild	small_reptiles	Reptile	Squamata	Dipsadidae	Philodryas_sp	Cobra_cipo	150	PNB	shoulder	2	09:54:00	168774	8264049	23L	sirgass_2000	10:14:00	1	removed	1	0	0	25.2	17.2	19.88	68.75	775	two_lane	2	DF_001	0	0.135703	0.420032	0	0.0274637	0.0638126	0	0.18336	0.148627
347	16	2014	june	autumn	3	02_06_2014	domestic	medium_mammals	Mammals	Carnivora	Felidae	Felis_catus	Gato_Domestico	5000	PNB	shoulder	2	10:01:00	169231	8266062	23L	sirgass_2000	11:03:00	96	remained	0	4	0	25.2	17.2	19.88	68.75	775	dirt_road	1	DF_001	0	0.0354553	0.278002	0	0.0209508	0.194198	0	0.177276	0.278807
348	16	2014	june	autumn	3	02_06_2014	domestic	Large_mammals	Mammals	Carnivora	Canidae	Canis_familiaris	Cachorro_Domestico	10000	ESECAE	shoulder	2	12:11:00	215258	8277990	23L	sirgass_2000	10:15:00	96	remained	0	4	0	25.2	17.2	19.88	68.75	2600	two_lane	2	DF_128	0	0.0759289	0.469305	0	0.0169628	0.00484653	0	0.17609	0.240711
349	16	2014	june	autumn	3	02_06_2014	wild	small_mammals	Mammals	Didelphimorphia	Didelphidae	Didelphis_albiventris	Gamba_ou_Sarue_	900	ESECAE	shoulder	2	12:17:00	216857	8279631	23L	sirgass_2000	12:39:00	1	removed	1	0	0	25.2	17.2	19.88	68.75	2600	two_lane	2	DF_128	0	0.0771104	0.494318	0	0.0422078	0.00162338	0	0.359578	0.0105519
350	16	2014	june	autumn	3	03_06_2014	wild	small_reptiles	Reptile	Squamata	Amphisbaenidae	AmphisbaeNA_alba	Cobra_de_duas_cabeças	25	JBB	lane	1	08:10:00	197842	8241458	23L	sirgass_2000	08:00:00	1	removed	1	0	0	25.6	15	19.3	79.25	7000	four_lane	3	DF_001	0	0.0452342	0.446688	0	0.03958	0.0379645	0.206785	0.193053	0
351	16	2014	june	autumn	3	03_06_2014	wild	small_birds	Birds	Passeriformes	Corvidae	Cyanocorax_cristatellus	Gralha	60	JBB	shoulder	2	08:54:00	185874	8230638	23L	sirgass_2000	08:28:00	1	removed	1	0	0	25.6	15	19.3	79.25	2000	two_lane	2	BR_251	0	0.025	0.929839	0	0.025	0.00725806	0	0	0
352	16	2014	june	autumn	3	03_06_2014	wild	small_mammals	Mammals	Didelphimorphia	Didelphidae	Didelphis_albiventris	Gamba_ou_Sarue_	900	PNB	shoulder	2	10:06:00	169070	8260602	23L	sirgass_2000	09:28:00	1	removed	1	0	0	25.6	15	19.3	79.25	775	two_lane	2	DF_001	0	0.0880452	0.358643	0	0.0605816	0.0961228	0	0.265751	0.112278
353	16	2014	june	autumn	3	04_06_2014	wild	large_birds	Birds	Strigiforme	Strigidae	Asio_clamator	Coruja_orelhuda	400	PNB	shoulder	2	09:20:00	173725	8254571	23L	sirgass_2000	11:14:00	48	removed	1	2	9.9	26	14.6	19.64	76.25	8000	two_lane	2	DF_001	0	0.0801619	0.250202	0.128745	0.0307692	0.0591093	0	0.436437	0
354	16	2014	june	autumn	3	04_06_2014	wild	large_birds	Birds	Strigiforme	Strigidae	Aegolius_harrisii	Cabure_Acanelado	155	ESECAE	shoulder	2	11:35:00	218346	8273822	23L	sirgass_2000	09:52:00	48	removed	1	2	9.9	26	14.6	19.64	76.25	5000	four_lane	3	BR_010_BR_020_BR_030	0	0.0719483	0.636217	0	0.0525465	0	0.0606306	0.146322	0
355	16	2014	june	autumn	3	04_06_2014	wild	small_birds	Birds	Passeriformes	Furnariidae	Phacellodomus_rufifrons	Joao_de_pau	24	ESECAE	shoulder	2	12:20:00	224838	8276670	23L	sirgass_2000	12:44:00	1	removed	1	0	9.9	26	14.6	19.64	76.25	951	two_lane	2	BR_010_DF_345	0	0.0193705	0.530266	0	0.000807103	0.000807103	0	0.400323	0
356	17	2014	july	winter	4	21_07_2014	domestic	Large_mammals	Mammals	Carnivora	Canidae	Canis_familiaris	Cachorro_Domestico	10000	ESECAE	lane	1	08:30:00	213479	8276160	23L	sirgass_2000	08:21:00	1	removed	1	0	6.8	26.7	14.3	20.4	51	2600	two_lane	2	DF_128	0.0266344	0.175141	0.359161	0	0.0451977	0	0	0.285714	0.0936239
357	17	2014	july	winter	4	22_07_2014	wild	small_birds	Birds	Passeriformes	Emberizidae	Volatinia_jacariNA	Tiziu	10	ESECAE	shoulder	2	07:57:00	221225	8274255	23L	sirgass_2000	07:58:00	1	removed	1	0	0	25.9	15.4	19.76	51.25	5000	four_lane	3	BR_010_BR_020_BR_030	0	0.00809717	0.459109	0	0.0234818	0	0	0.476923	0
358	17	2014	july	winter	4	22_07_2014	wild	small_reptiles	Reptile	Squamata	Dipsadidae	Oxyrhopus_sp	Coral_falsa	80	ESECAE	lane	1	08:51:00	228433	8282602	23L	sirgass_2000	08:04:00	72	removed	1	3	0	25.9	15.4	19.76	51.25	33	dirt_road	1	DF_205	0	0.0162338	0.198864	0	0.0137987	0	0	0.73539	0
359	17	2014	july	winter	4	22_07_2014	wild	medium_mammals	Mammals	Carnivora	Mephitidae	Conepatus_semistriatus	Jaritataca	3400	JBB	shoulder	2	11:53:00	198008	8239473	23L	sirgass_2000	09:16:00	72	removed	1	3	0	25.9	15.4	19.76	51.25	7000	four_lane	3	DF_001	0	0.163842	0.591606	0	0.0104923	0.0177563	0.0137207	0.179177	0
360	17	2014	july	winter	4	23_07_2014	wild	large_birds	Birds	Strigiforme	Strigidae	NA	Coruja	200	ESECAE	shoulder	2	08:35:00	216147	8278905	23L	sirgass_2000	08:53:00	1	removed	1	0	0	24.8	15	19.2	61.25	2600	two_lane	2	DF_128	0	0.0646726	0.493937	0	0.025869	0.00485044	0	0.279709	0.117219
361	17	2014	july	winter	4	23_07_2014	wild	small_mammals	Mammals	Rodentia	Cricetidae	Necromys_lasiurus	Rato_silvestre	40	ESECAE	shoulder	2	08:35:00	216147	8278905	23L	sirgass_2000	08:53:00	1	removed	1	0	0	24.8	15	19.2	61.25	2600	two_lane	2	DF_128	0	0.0646726	0.493937	0	0.025869	0.00485044	0	0.279709	0.117219
362	18	2014	august	winter	4	25_08_2014	wild	Large_reptiles	Reptile	Squamata	Dipsadidae	Pseudoboa_nigra	Cobra_Preta	180	JBB	lane	1	08:07:00	198084	8239912	23L	sirgass_2000	08:08:00	24	removed	1	1	0	28.7	14.7	22.16	36.5	7000	four_lane	3	DF_001	0	0.161943	0.511741	0	0.00728745	0.011336	0.0340081	0.245344	0
363	18	2014	august	winter	4	25_08_2014	wild	medium_mammals	Mammals	Lagomorpha	Leporidae	Sylvilagus_brasiliensis	Tapiti	1500	FAL	shoulder	2	08:42:00	185883	8230642	23L	sirgass_2000	07:58:00	96	remained	0	4	0	28.7	14.7	22.16	36.5	2000	two_lane	2	BR_251	0	0.0257442	0.929204	0	0.0249397	0.00724055	0	0	0
364	18	2014	august	winter	4	26_08_2014	wild	small_birds	Birds	Passeriformes	Thraupidae	Lanio_pileatus	Tico_tico_rei_cinza	16	JBB	shoulder	2	08:20:00	194766	8235369	23L	sirgass_2000	08:23:00	1	removed	1	0	0	30.8	15.8	24.04	31	2000	two_lane	2	DF_001	0	0.130259	0.480583	0	0.0177994	0.00809061	0.0275081	0.274272	0.0355987
365	18	2014	august	winter	4	26_08_2014	wild	small_birds	Birds	Passeriformes	Emberizidae	Volatinia_jacariNA	Tiziu	10	JBB	shoulder	2	08:23:00	194727	8235331	23L	sirgass_2000	08:24:00	1	removed	1	0	0	30.8	15.8	24.04	31	2000	two_lane	2	DF_001	0	0.127935	0.480972	0	0.0186235	0.00809717	0.0275304	0.275304	0.0356275
366	18	2014	august	winter	4	26_08_2014	wild	small_birds	Birds	Passeriformes	Emberizidae	Volatinia_jacariNA	Tiziu	10	JBB	lane	1	08:28:00	194664	8235273	23L	sirgass_2000	08:25:00	1	removed	1	0	0	30.8	15.8	24.04	31	2000	two_lane	2	DF_001	0	0.127229	0.475689	0	0.0202593	0.00810373	0.0251216	0.28282	0.0356564
367	18	2014	august	winter	4	26_08_2014	wild	small_birds	Birds	Passeriformes	NA	NA	Passeriforme	25	JBB	shoulder	2	08:33:00	193368	8234116	23L	sirgass_2000	08:29:00	1	removed	1	0	0	30.8	15.8	24.04	31	2000	two_lane	2	BR_251	0	0.106504	0.430081	0	0.0495935	0.0146341	0.00813008	0.334959	0.0349593
368	18	2014	august	winter	4	26_08_2014	wild	small_birds	Birds	Passeriformes	NA	NA	Passeriforme	25	PNB	shoulder	2	09:40:00	173280	8252774	23L	sirgass_2000	08:55:00	72	removed	1	3	0	30.8	15.8	24.04	31	8000	two_lane	2	DF_001	0	0.178947	0.185425	0.147368	0.0251012	0.11336	0.129555	0.174899	0.00404858
369	18	2014	august	winter	4	27_08_2014	wild	large_birds	Birds	Strigiforme	Tytonidae	Tyto_alba	Suindara	500	JBB	shoulder	2	08:06:00	198041	8239618	23L	sirgass_2000	07:43:00	48	removed	1	2	0	31	17.2	24	32.25	7000	four_lane	3	DF_001	0	0.164773	0.564123	0	0.00974026	0.0162338	0.0186688	0.202922	0
370	18	2014	august	winter	4	27_08_2014	wild	small_birds	Birds	Passeriformes	Tyrannidae	Tyrannus_savana	Tesourinha	33	JBB	shoulder	2	08:18:00	196186	8236635	23L	sirgass_2000	08:33:00	1	removed	1	0	0	31	17.2	24	32.25	2000	two_lane	2	DF_001	0	0.0963563	0.631579	0	0.0137652	0.00809717	0.0097166	0.209717	0
371	18	2014	august	winter	4	27_08_2014	wild	small_reptiles	Reptile	Squamata	Dipsadidae	Oxyrhopus_sp	Coral_falsa	80	PNB	shoulder	2	09:46:00	171007	8257753	23L	sirgass_2000	09:55:00	1	removed	1	0	0	31	17.2	24	32.25	8000	two_lane	2	DF_001	0	0.0269608	0.323529	0.29085	0.131536	0.189542	0	0.0236928	0
372	18	2014	august	winter	4	27_08_2014	wild	small_birds	Birds	Passeriformes	Furnariidae	Phacellodomus_rufifrons	Joao_de_pau	24	ESECAE	shoulder	2	11:24:00	218067	8273846	23L	sirgass_2000	11:31:00	1	removed	1	0	0	31	17.2	24	32.25	5000	four_lane	3	BR_010_BR_020_BR_030	0	0.0897332	0.609539	0	0.0565885	0	0.0929669	0.119644	0
373	18	2014	august	winter	4	27_08_2014	wild	large_birds	Birds	Strigiforme	Strigidae	Asio_clamator	Coruja_orelhuda	400	ESECAE	shoulder	2	11:45:00	218197	8273867	23L	sirgass_2000	09:52:00	48	removed	1	2	0	31	17.2	24	32.25	5000	four_lane	3	BR_010_BR_020_BR_030	0	0.0793522	0.626721	0	0.0566802	0	0.0720648	0.131984	0
374	18	2014	august	winter	4	27_08_2014	wild	small_birds	Birds	Passeriformes	Tyrannidae	Machetornis_rixosa	Suiriri_Cavalheiro	32	ESECAE	shoulder	2	12:08:00	215636	8278379	23L	sirgass_2000	10:05:00	24	removed	1	1	0	31	17.2	24	32.25	2600	two_lane	2	DF_128	0	0.0682927	0.484553	0	0.0178862	0.00487805	0	0.198374	0.209756
375	19	2014	september	winter	4	22_09_2014	wild	Large_reptiles	Reptile	Squamata	Viperidae	Crotalus_durissus	Cascavel	550	ESECAE	shoulder	2	07:40:00	218667	8273781	23L	sirgass_2000	07:41:00	96	remained	0	4	0	30.8	19	23.92	56.25	5000	four_lane	3	BR_010_BR_020_BR_030	0	0.0541633	0.651576	0	0.0485044	0	0.0339531	0.179466	0
376	19	2014	september	winter	4	22_09_2014	domestic	Large_mammals	Mammals	Carnivora	Canidae	Canis_familiaris	Cachorro_Domestico	10000	ESECAE	shoulder	2	08:05:00	218941	8273809	23L	sirgass_2000	07:46:00	96	remained	0	4	0	30.8	19	23.92	56.25	5000	four_lane	3	BR_010_BR_020_BR_030	0	0.0403877	0.65105	0	0.0476575	0	0.0218094	0.206785	0
377	19	2014	september	winter	4	22_09_2014	wild	Large_mammals	Mammals	Carnivora	Canidae	Cerdocyon_thous	Cachorro_do_mato	5700	PNB	lane	1	10:06:00	175024	8273597	23L	sirgass_2000	10:39:00	1	removed	1	0	0	30.8	19	23.92	56.25	775	dirt_road	1	DF_001	0	0.0972447	0.329822	0	0.0737439	0.253647	0	0.0210697	0.213128
378	19	2014	september	winter	4	22_09_2014	domestic	medium_mammals	Mammals	Carnivora	Felidae	Felis_catus	Gato_Domestico	5000	PNB	shoulder	2	10:31:00	168963	8261738	23L	sirgass_2000	09:11:00	96	remained	0	4	0	30.8	19	23.92	56.25	775	two_lane	2	DF_001	0	0.121655	0.453366	0	0.0364964	0.0470397	0	0.277372	0.0446067
379	19	2014	september	winter	4	23_09_2014	wild	medium_mammals	Mammals	Carnivora	Mustelidae	Galictis_cuja	Furao	1600	FAL	shoulder	2	12:05:00	181815	8231602	23L	sirgass_2000	12:32:00	72	removed	1	3	0	29.8	19.4	24.36	50	2000	two_lane	2	BR_251	0.00161551	0.0387722	0.605008	0	0.0864297	0.0605816	0.0250404	0.126817	0
380	20	2014	october	spring	1	13_10_2014	wild	small_birds	Birds	Passeriformes	Tyrannidae	Elaenia_chiriquensis	Chibum	15	JBB	shoulder	2	08:14:00	194695	8235303	23L	sirgass_2000	08:07:00	1	removed	1	0	0	32.4	20.2	26.4	27.75	2000	two_lane	2	DF_001	0	0.127229	0.47812	0	0.0202593	0.00810373	0.0251216	0.278768	0.0356564
381	20	2014	october	spring	1	13_10_2014	domestic	Large_mammals	Mammals	Carnivora	Canidae	Canis_familiaris	Cachorro_Domestico	10000	PNB	shoulder	2	10:02:00	177963	8275298	23L	sirgass_2000	09:28:00	96	remained	0	4	0	32.4	20.2	26.4	27.75	775	two_lane	2	DF_001	0	0.0516129	0.329839	0	0.00725806	0.00725806	0	0.572581	0.0137097
382	20	2014	october	spring	1	13_10_2014	wild	small_birds	Birds	Passeriformes	NA	NA	Passeriforme	25	ESECAE	lane	1	11:57:00	218039	8280855	23L	sirgass_2000	10:10:00	96	remained	0	4	0	32.4	20.2	26.4	27.75	2600	two_lane	2	DF_128	0	0.118453	0.44722	0	0.0273973	0.0362611	0	0.343272	0
383	20	2014	october	spring	1	14_10_2014	domestic	medium_mammals	Mammals	Carnivora	Felidae	Felis_catus	Gato_Domestico	5000	FAL	shoulder	2	08:19:00	189676	8232034	23L	sirgass_2000	08:19:00	72	removed	1	3	0	33.1	19.9	27.16	25	2000	two_lane	2	BR_251	0	0.0420372	0.771221	0	0.0347615	0.0169766	0	0.12207	0
384	20	2014	october	spring	1	14_10_2014	wild	small_birds	Birds	Passeriformes	Thraupidae	Tangara_sayaca	Sanhaco_cinzento	42	PNB	lane	1	10:40:00	192558	8264241	23L	sirgass_2000	10:44:00	1	removed	1	0	0	33.1	19.9	27.16	25	775	two_lane	2	DF_001	0	0.153285	0.364964	0	0.0454177	0.190592	0.0778589	0.0778589	0.0486618
385	20	2014	october	spring	1	14_10_2014	wild	small_birds	Birds	Apodiforme	Trochilidae	Chlorostilbon_lucidus	Besourinho_de_bico_vermelho	4	ESECAE	lane	1	11:28:00	222309	8274628	23L	sirgass_2000	11:24:00	1	removed	1	0	0	33.1	19.9	27.16	25	5000	four_lane	3	BR_010_BR_020_BR_030	0	0.00483871	0.487097	0	0	0	0	0.470161	0
386	20	2014	october	spring	1	14_10_2014	wild	small_birds	Birds	Passeriformes	Tyrannidae	Tyrannus_savana	Tesourinha	33	ESECAE	shoulder	2	11:41:00	216095	8274028	23L	sirgass_2000	11:37:00	1	removed	1	0	0	33.1	19.9	27.16	25	5000	four_lane	3	BR_010_BR_020_BR_030	0	0.200483	0.42351	0	0.0611916	0	0.230274	0	0.0523349
387	20	2014	october	spring	1	14_10_2014	wild	small_birds	Birds	Passeriformes	Furnariidae	Phacellodomus_rufifrons	Joao_de_pau	24	ESECAE	shoulder	2	12:44:00	225705	8277853	23L	sirgass_2000	12:42:00	1	removed	1	0	0	33.1	19.9	27.16	25	951	two_lane	2	BR_010_DF_345	0	0.0138889	0.455065	0	0.0318627	0.0253268	0	0.446895	0
388	20	2014	october	spring	1	14_10_2014	wild	Large_mammals	Mammals	Carnivora	Canidae	Cerdocyon_thous	Cachorro_do_mato	5700	ESECAE	shoulder	2	12:56:00	222101	8274552	23L	sirgass_2000	10:34:00	72	removed	1	3	0	33.1	19.9	27.16	25	5000	four_lane	3	BR_010_BR_020_BR_030	0	0.00567261	0.47812	0	0	0	0	0.482172	0
389	20	2014	october	spring	1	15_10_2014	wild	small_birds	Birds	Passeriformes	Emberizidae	Volatinia_jacariNA	Tiziu	10	PNB	lane	1	10:14:00	183835	8270865	23L	sirgass_2000	10:46:00	1	removed	1	0	0	35	19.1	27.86	19.75	775	two_lane	2	DF_001	0	0.00322061	0.365539	0	0.120773	0.0201288	0	0.477456	0
390	20	2014	october	spring	1	15_10_2014	wild	small_birds	Birds	Passeriformes	NA	NA	Passeriforme	25	PNB	lane	1	10:36:00	189355	8266802	23L	sirgass_2000	11:00:00	1	removed	1	0	0	35	19.1	27.86	19.75	775	two_lane	2	DF_001	0.00162075	0.0656402	0.730146	0	0.034846	0.1094	0.00567261	0.0397083	0
391	20	2014	october	spring	1	15_10_2014	wild	small_birds	Birds	Passeriformes	Thraupidae	Tangara_sayaca	Sanhaco_cinzento	42	ESECAE	shoulder	2	12:00:00	217071	8279855	23L	sirgass_2000	10:06:00	48	removed	1	2	0	35	19.1	27.86	19.75	2600	two_lane	2	DF_128	0	0.0887813	0.480226	0	0.0403551	0.00484262	0	0.363196	0.00242131
392	20	2014	october	spring	1	15_10_2014	domestic	large_birds	Ave	Galliforme	Phasianidae	Gallus_gallus_domesticus	Galinha	1500	ESECAE	lane	1	12:15:00	221907	8282317	23L	sirgass_2000	10:16:00	48	removed	1	2	0	35	19.1	27.86	19.75	33	dirt_road	1	DF_205	0	0.158192	0.525424	0	0.023406	0.00484262	0	0.277643	0
393	21	2014	november	spring	1	03_11_2014	wild	small_birds	Birds	Apodiforme	Trochilidae	Colibri_serrirostris	Beija_flor_de_orelha_violeta	8	ESECAE	lane	1	08:35:00	212569	8275119	23L	sirgass_2000	08:56:00	1	removed	1	0	0	29.7	18	23.24	61.25	2600	two_lane	2	DF_128	0.12055	0.308252	0.268608	0	0.0428803	0	0.0428803	0.145631	0.0355987
394	21	2014	november	spring	1	03_11_2014	wild	small_reptiles	Reptile	Squamata	Dipsadidae	Philodryas_olfersii	Cobra_verde	150	ESECAE	lane	1	08:54:00	215153	8277883	23L	sirgass_2000	09:11:00	1	removed	1	0	0	29.7	18	23.24	61.25	2600	two_lane	2	DF_128	0	0.0783522	0.462036	0	0.0153473	0.00484653	0	0.180129	0.243134
395	21	2014	november	spring	1	03_11_2014	wild	small_birds	Birds	Passeriformes	Turdidae	Turdus_sp.	Sabia_do_campo	100	ESECAE	shoulder	2	09:01:00	216195	8278956	23L	sirgass_2000	09:40:00	24	removed	1	1	0	29.7	18	23.24	61.25	2600	two_lane	2	DF_128	0	0.0672609	0.495948	0	0.028363	0.00486224	0	0.284441	0.106159
396	21	2014	november	spring	1	03_11_2014	wild	Large_reptiles	Reptile	Squamata	Boidae	Epicrates_cenchria	Jiboia_arco_iris	3000	ESECAE	lane	1	09:24:00	224403	8282521	23L	sirgass_2000	09:48:00	48	removed	1	2	0	29.7	18	23.24	61.25	33	dirt_road	1	DF_205	0	0.0936239	0.473769	0	0.0290557	0	0	0.401937	0
397	21	2014	november	spring	1	03_11_2014	wild	small_reptiles	Reptile	Squamata	Teiidae	Cnemidophorus_sp.	Lagarto	4	ESECAE	lane	1	09:24:00	224403	8282521	23L	sirgass_2000	09:19:00	24	removed	1	1	0	29.7	18	23.24	61.25	33	dirt_road	1	DF_205	0	0.0936239	0.473769	0	0.0290557	0	0	0.401937	0
398	21	2014	november	spring	1	03_11_2014	wild	small_reptiles	Reptile	Squamata	Teiidae	Cnemidophorus_sp.	Lagarto	4	PNB	lane	1	10:21:00	187338	8268302	23L	sirgass_2000	10:40:00	1	removed	1	0	0	29.7	18	23.24	61.25	775	two_lane	2	DF_001	0	0.0186386	0.591572	0	0.0218801	0.00729335	0	0.280389	0.0672609
399	21	2014	november	spring	1	03_11_2014	wild	small_birds	Birds	Passeriformes	NA	NA	Passeriforme	25	PNB	lane	1	10:21:00	187338	8268302	23L	sirgass_2000	10:36:00	24	removed	1	1	0	29.7	18	23.24	61.25	775	two_lane	2	DF_001	0	0.0186386	0.591572	0	0.0218801	0.00729335	0	0.280389	0.0672609
400	21	2014	november	spring	1	03_11_2014	wild	small_reptiles	Reptile	Squamata	Teiidae	Cnemidophorus_sp.	Lagarto	4	PNB	lane	1	10:29:00	186395	8268997	23L	sirgass_2000	10:46:00	1	removed	1	0	0	29.7	18	23.24	61.25	775	two_lane	2	DF_001	0	0.00892133	0.442011	0	0.0332522	0.0210868	0	0.412003	0.0689376
401	21	2014	november	spring	1	03_11_2014	wild	small_birds	Birds	Passeriformes	NA	NA	Passeriforme	25	PNB	lane	1	10:32:00	186373	8269011	23L	sirgass_2000	10:41:00	24	removed	1	1	0	29.7	18	23.24	61.25	775	two_lane	2	DF_001	0	0.00731113	0.441105	0	0.0333063	0.021121	0	0.414297	0.0690496
402	21	2014	november	spring	1	03_11_2014	wild	small_birds	Birds	Cuculiforme	Cuculidae	Guira_guira	Anu_branco	100	PNB	shoulder	2	10:35:00	185751	8269468	23L	sirgass_2000	10:51:00	1	removed	1	0	0	29.7	18	23.24	61.25	775	two_lane	2	DF_001	0	0.00323363	0.426031	0	0.0379951	0.0194018	0	0.455942	0.0444624
403	21	2014	november	spring	1	03_11_2014	wild	small_birds	Birds	Cuculiforme	Cuculidae	Guira_guira	Anu_branco	100	PNB	lane	1	10:38:00	185716	8269496	23L	sirgass_2000	10:52:00	1	removed	1	0	0	29.7	18	23.24	61.25	775	two_lane	2	DF_001	0	0.00323625	0.423139	0	0.038835	0.0194175	0	0.460356	0.0420712
404	21	2014	november	spring	1	03_11_2014	wild	small_birds	Birds	Passeriformes	NA	NA	Passeriforme	25	PNB	lane	1	10:41:00	184910	8270089	23L	sirgass_2000	10:48:00	24	removed	1	1	0	29.7	18	23.24	61.25	775	two_lane	2	DF_001	0	0.00322841	0.397902	0	0.0653753	0.0185634	0	0.501211	0
405	21	2014	november	spring	1	03_11_2014	wild	small_birds	Birds	Passeriformes	Tyrannidae	Pitangus_sulphuratus	Bem_te_vi	60	PNB	lane	1	10:54:00	183845	8270870	23L	sirgass_2000	11:16:00	1	removed	1	0	0	29.7	18	23.24	61.25	775	two_lane	2	DF_001	0	0.00323363	0.361358	0	0.121261	0.0202102	0	0.481002	0
406	21	2014	november	spring	1	03_11_2014	wild	small_birds	Birds	Passeriformes	NA	NA	Passeriforme	25	PNB	lane	1	11:45:00	173034	8256718	23L	sirgass_2000	11:54:00	24	removed	1	1	0	29.7	18	23.24	61.25	8000	two_lane	2	DF_001	0	0.038835	0.538835	0.113269	0.0404531	0.171521	0	0.0817152	0
407	21	2014	november	spring	1	03_11_2014	domestic	large_birds	Ave	Galliforme	Phasianidae	Gallus_gallus_domesticus	Galinha	1500	PNB	lane	1	11:51:00	173634	8253714	23L	sirgass_2000	12:13:00	1	removed	1	0	0	29.7	18	23.24	61.25	8000	two_lane	2	DF_001	0	0.152913	0.210356	0.148058	0.0323625	0.078479	0	0.359223	0
408	21	2014	november	spring	1	03_11_2014	wild	small_birds	Birds	Passeriformes	NA	NA	Passeriforme	25	FAL	lane	1	12:36:00	183402	8231164	23L	sirgass_2000	13:26:00	1	removed	1	0	0	29.7	18	23.24	61.25	2000	two_lane	2	BR_251	0.00162602	0.0349593	0.64878	0	0.0886179	0.0504065	0.0178862	0.117886	0
409	21	2014	november	spring	1	03_11_2014	wild	Large_reptiles	Reptile	Squamata	Dipsadidae	Boiruna_maculata	Cobra_Preta	180	JBB	lane	1	13:15:00	197943	8239377	23L	sirgass_2000	11:25:00	96	remained	0	4	0	29.7	18	23.24	61.25	7000	four_lane	3	DF_001	0	0.165049	0.613269	0	0.012945	0.0186084	0.00889968	0.158576	0
410	21	2014	november	spring	1	04_11_2014	wild	small_birds	Birds	Passeriformes	Tyrannidae	Tyrannus_savana	Tesourinha	33	ESECAE	shoulder	2	08:03:00	218617	8273788	23L	sirgass_2000	07:47:00	1	removed	1	0	8.1	28.4	18.8	22.24	75.25	5000	four_lane	3	BR_010_BR_020_BR_030	0	0.0565428	0.651858	0	0.049273	0	0.0347334	0.174475	0
411	21	2014	november	spring	1	04_11_2014	wild	small_reptiles	Reptile	Squamata	Dipsadidae	Oxyrhopus_sp	Coral_falsa	80	ESECAE	lane	1	08:03:00	218617	8273788	23L	sirgass_2000	07:47:00	1	removed	1	0	8.1	28.4	18.8	22.24	75.25	5000	four_lane	3	BR_010_BR_020_BR_030	0	0.0565428	0.651858	0	0.049273	0	0.0347334	0.174475	0
412	21	2014	november	spring	1	04_11_2014	wild	small_birds	Birds	Passeriformes	Tyrannidae	Tyrannus_savana	Tesourinha	33	ESECAE	shoulder	2	08:21:00	223316	8274943	23L	sirgass_2000	08:43:00	72	removed	1	3	8.1	28.4	18.8	22.24	75.25	5000	four_lane	3	BR_010_BR_020_BR_030	0	0.0211039	0.479708	0	0	0.000811688	0	0.450487	0
413	21	2014	november	spring	1	04_11_2014	domestic	Large_mammals	Mammals	Carnivora	Canidae	Canis_familiaris	Cachorro_Domestico	10000	ESECAE	shoulder	2	08:33:00	220897	8274192	23L	sirgass_2000	08:46:00	72	removed	1	3	8.1	28.4	18.8	22.24	75.25	5000	four_lane	3	BR_010_BR_020_BR_030	0	0.0177706	0.472536	0	0.0315024	0	0	0.44588	0
414	21	2014	november	spring	1	04_11_2014	wild	small_birds	Birds	Passeriformes	NA	NA	Passeriforme	25	ESECAE	lane	1	09:15:00	216454	8279221	23L	sirgass_2000	08:41:00	1	removed	1	0	8.1	28.4	18.8	22.24	75.25	2600	two_lane	2	DF_128	0	0.0726979	0.495961	0	0.0444265	0.00484653	0	0.318255	0.0533118
415	21	2014	november	spring	1	04_11_2014	wild	small_birds	Birds	Passeriformes	Thraupidae	Tangara_sayaca	Sanhaco_cinzento	42	ESECAE	shoulder	2	09:20:00	217531	8280328	23L	sirgass_2000	08:45:00	1	removed	1	0	8.1	28.4	18.8	22.24	75.25	2600	two_lane	2	DF_128	0	0.108042	0.476848	0	0.0324939	0.0235581	0	0.333875	0
416	21	2014	november	spring	1	04_11_2014	wild	small_birds	Birds	Passeriformes	Tyrannidae	Tyrannus_savana	Tesourinha	33	ESECAE	shoulder	2	09:25:00	218223	8281041	23L	sirgass_2000	09:22:00	72	removed	1	3	8.1	28.4	18.8	22.24	75.25	2600	two_lane	2	DF_128	0	0.123177	0.444084	0	0.0243112	0.034846	0	0.345219	0
417	21	2014	november	spring	1	04_11_2014	wild	small_birds	Birds	Apodiforme	Trochilidae	NA	Beija_flor	8	ESECAE	shoulder	2	09:25:00	218223	8281041	23L	sirgass_2000	09:22:00	48	removed	1	2	8.1	28.4	18.8	22.24	75.25	2600	two_lane	2	DF_128	0	0.123177	0.444084	0	0.0243112	0.034846	0	0.345219	0
418	21	2014	november	spring	1	04_11_2014	domestic	small_birds	Ave	Passeriformes	Passeridae	Passer_domesticus	Pardal	26	PNB	shoulder	2	10:36:00	188862	8267180	23L	sirgass_2000	10:40:00	24	removed	1	1	8.1	28.4	18.8	22.24	75.25	775	two_lane	2	DF_001	0.000810373	0.0623987	0.734198	0	0.0372771	0.0688817	0.00486224	0.0664506	0.0113452
419	21	2014	november	spring	1	04_11_2014	wild	small_birds	Birds	Passeriformes	NA	NA	Passeriforme	25	PNB	shoulder	2	10:53:00	185552	8269618	23L	sirgass_2000	10:45:00	1	removed	1	0	8.1	28.4	18.8	22.24	75.25	775	two_lane	2	DF_001	0	0.00242522	0.417947	0	0.043654	0.0194018	0	0.474535	0.0291027
420	21	2014	november	spring	1	04_11_2014	wild	small_birds	Birds	Passeriformes	NA	NA	Passeriforme	25	PNB	lane	1	10:56:00	185512	8269647	23L	sirgass_2000	10:45:00	1	removed	1	0	8.1	28.4	18.8	22.24	75.25	775	two_lane	2	DF_001	0	0.002443	0.422638	0	0.0423453	0.019544	0	0.473941	0.0260586
421	21	2014	november	spring	1	04_11_2014	wild	small_birds	Birds	Passeriformes	NA	NA	Passeriforme	25	PNB	shoulder	2	10:57:00	185497	8269657	23L	sirgass_2000	10:46:00	1	removed	1	0	8.1	28.4	18.8	22.24	75.25	775	two_lane	2	DF_001	0	0.00243309	0.418491	0	0.0462287	0.0194647	0	0.475264	0.0251419
422	21	2014	november	spring	1	04_11_2014	wild	small_birds	Birds	Passeriformes	Thraupidae	Cypsnagra_hirundinacea	Bandoleta	28	PNB	shoulder	2	11:01:00	185363	8269757	23L	sirgass_2000	10:59:00	24	removed	1	1	8.1	28.4	18.8	22.24	75.25	775	two_lane	2	DF_001	0	0.00242522	0.417947	0	0.0468876	0.0194018	0	0.485044	0.0153597
423	21	2014	november	spring	1	04_11_2014	wild	small_birds	Birds	Passeriformes	Mimidae	Mimus_saturninus	Sabia_do_campo	73	PNB	shoulder	2	11:51:00	168818	8263427	23L	sirgass_2000	11:38:00	1	removed	1	0	8.1	28.4	18.8	22.24	75.25	775	two_lane	2	DF_001	0	0.140902	0.449275	0	0.02657	0.0595813	0	0.23591	0.0619968
424	21	2014	november	spring	1	04_11_2014	wild	small_birds	Birds	Passeriformes	Emberizidae	Volatinia_jacariNA	Tiziu	10	FAL	shoulder	2	13:33:00	186174	8230680	23L	sirgass_2000	12:50:00	1	removed	1	0	8.1	28.4	18.8	22.24	75.25	2000	two_lane	2	BR_251	0	0.0266774	0.934519	0	0.0210186	0.00485044	0	0	0
425	21	2014	november	spring	1	04_11_2014	wild	small_birds	Birds	Passeriformes	Emberizidae	Emberizoides_herbicola	CaNArio_do_campo	15	IBGE	shoulder	2	13:52:00	193448	8234176	23L	sirgass_2000	11:34:00	72	removed	1	3	8.1	28.4	18.8	22.24	75.25	2000	two_lane	2	BR_251	0	0.110931	0.42753	0	0.0502024	0.0145749	0.00809717	0.331984	0.0356275
426	21	2014	november	spring	1	05_11_2014	wild	small_reptiles	Reptile	Squamata	Dipsadidae	Oxyrhopus_guibei	Coral_falsa	80	ESECAE	shoulder	2	07:49:00	218870	8273763	23L	sirgass_2000	08:36:00	48	removed	1	2	3.8	29.3	17.9	22.56	67	5000	four_lane	3	BR_010_BR_020_BR_030	0	0.0427764	0.652139	0	0.047619	0	0.0258273	0.199354	0
427	21	2014	november	spring	1	05_11_2014	wild	small_birds	Birds	Passeriformes	Tyrannidae	Tyrannus_savana	Tesourinha	33	ESECAE	lane	1	07:52:00	219578	8273736	23L	sirgass_2000	08:24:00	1	removed	1	0	3.8	29.3	17.9	22.56	67	5000	four_lane	3	BR_010_BR_020_BR_030	0	0.0379645	0.582391	0	0.0452342	0	0.00242326	0.300485	0
428	21	2014	november	spring	1	05_11_2014	wild	small_birds	Birds	Passeriformes	NA	NA	Passeriforme	25	ESECAE	shoulder	2	08:27:00	212699	8275356	23L	sirgass_2000	09:06:00	1	removed	1	0	3.8	29.3	17.9	22.56	67	2600	two_lane	2	DF_128	0.107317	0.298374	0.286992	0	0.0398374	0	0.0146341	0.185366	0.0365854
429	21	2014	november	spring	1	05_11_2014	wild	small_birds	Birds	Passeriformes	NA	NA	Passeriforme	25	ESECAE	shoulder	2	08:35:00	215531	8278271	23L	sirgass_2000	09:18:00	1	removed	1	0	3.8	29.3	17.9	22.56	67	2600	two_lane	2	DF_128	0	0.0720065	0.479773	0	0.0169903	0.00485437	0	0.18932	0.220874
430	21	2014	november	spring	1	05_11_2014	wild	small_birds	Birds	Passeriformes	NA	NA	Passeriforme	25	ESECAE	lane	1	09:35:00	227690	8280545	23L	sirgass_2000	10:07:00	24	removed	1	1	3.8	29.3	17.9	22.56	67	951	two_lane	2	BR_010_DF_345	0	0.0266559	0.443457	0	0.0145396	0.0315024	0	0.457997	0
431	21	2014	november	spring	1	05_11_2014	wild	small_birds	Birds	Passeriformes	Emberizidae	Volatinia_jacariNA	Tiziu	10	ESECAE	shoulder	2	09:46:00	224204	8275813	23L	sirgass_2000	10:15:00	1	removed	1	0	3.8	29.3	17.9	22.56	67	951	two_lane	2	BR_010_DF_345	0	0.0234438	0.521423	0	0.00485044	0.000808407	0	0.40097	0
432	21	2014	november	spring	1	05_11_2014	domestic	small_birds	Ave	Passeriformes	Passeridae	Passer_domesticus	Pardal	26	PNB	lane	1	10:27:00	188472	8267470	23L	sirgass_2000	10:53:00	1	removed	1	0	3.8	29.3	17.9	22.56	67	775	two_lane	2	DF_001	0	0.0541633	0.717057	0	0.0307195	0.0412288	0.00323363	0.105093	0.0355699
433	21	2014	november	spring	1	05_11_2014	wild	large_birds	Birds	Strigiforme	Strigidae	Athene_cunicularia	Coruja_Buraqueira	200	PNB	lane	1	10:30:00	187924	8267873	23L	sirgass_2000	10:48:00	1	removed	1	0	3.8	29.3	17.9	22.56	67	775	two_lane	2	DF_001	0	0.0356275	0.661538	0	0.0267206	0.0210526	0	0.174089	0.0672065
434	21	2014	november	spring	1	05_11_2014	wild	small_birds	Birds	Passeriformes	NA	NA	Passeriforme	25	PNB	shoulder	2	10:42:00	186368	8269018	23L	sirgass_2000	09:55:00	48	removed	1	2	3.8	29.3	17.9	22.56	67	775	two_lane	2	DF_001	0	0.00728155	0.438511	0	0.0331715	0.0210356	0	0.417476	0.0687702
435	21	2014	november	spring	1	05_11_2014	wild	small_birds	Birds	Passeriformes	Emberizidae	Volatinia_jacariNA	Tiziu	10	PNB	lane	1	11:35:00	168802	8263592	23L	sirgass_2000	10:31:00	48	removed	1	2	3.8	29.3	17.9	22.56	67	775	two_lane	2	DF_001	0	0.137429	0.444624	0	0.0274859	0.0598222	0	0.22312	0.083266
436	21	2014	november	spring	1	05_11_2014	wild	small_birds	Birds	Passeriformes	Tyrannidae	Tyrannus_savana	Tesourinha	33	FAL	shoulder	2	13:00:00	190936	8232517	23L	sirgass_2000	10:47:00	48	removed	1	2	3.8	29.3	17.9	22.56	67	2000	two_lane	2	BR_251	0	0.0646726	0.521423	0	0.0582053	0.039612	0	0.303153	0
437	21	2014	november	spring	1	05_11_2014	wild	small_birds	Birds	Passeriformes	Emberizidae	Volatinia_jacariNA	Tiziu	10	FAL	shoulder	2	13:07:00	193102	8233863	23L	sirgass_2000	13:11:00	1	removed	1	0	3.8	29.3	17.9	22.56	67	2000	two_lane	2	BR_251	0	0.096748	0.417886	0	0.0439024	0.0195122	0.00813008	0.369106	0.0268293
438	21	2014	november	spring	1	05_11_2014	wild	large_birds	Birds	Strigiforme	Strigidae	NA	Coruja	200	IBGE	shoulder	2	13:11:00	193527	8234243	23L	sirgass_2000	13:21:00	1	removed	1	0	3.8	29.3	17.9	22.56	67	2000	two_lane	2	BR_251	0	0.114701	0.430533	0	0.0500808	0.0137318	0.00807754	0.326333	0.0355412
439	22	2014	december	spring	1	08_12_2014	wild	small_mammals	Mammals	Chiroptera	NA	NA	Morcego	20	JBB	shoulder	2	08:02:00	197865	8241366	23L	sirgass_2000	07:59:00	1	removed	1	0	15.2	20	17.1	18.32	91	7000	four_lane	3	DF_001	0	0.0486224	0.449757	0	0.0316045	0.034846	0.202593	0.201783	0
440	22	2014	december	spring	1	08_12_2014	wild	Large_reptiles	Reptile	Squamata	Dipsadidae	Helicops_modestus	Cobra_Preta	180	JBB	shoulder	2	08:25:00	198034	8239593	23L	sirgass_2000	08:20:00	96	remained	0	4	15.2	20	17.1	18.32	91	7000	four_lane	3	DF_001	0	0.164239	0.56877	0	0.0105178	0.0169903	0.0169903	0.199029	0
441	22	2014	december	spring	1	08_12_2014	wild	small_birds	Birds	Passeriformes	Emberizidae	Volatinia_jacariNA	Tiziu	10	JBB	lane	1	08:39:00	194725	8235331	23L	sirgass_2000	08:39:00	1	removed	1	0	15.2	20	17.1	18.32	91	2000	two_lane	2	DF_001	0	0.127935	0.480972	0	0.0186235	0.00809717	0.0275304	0.275304	0.0356275
442	22	2014	december	spring	1	08_12_2014	wild	small_birds	Birds	Passeriformes	Emberizidae	Volatinia_jacariNA	Tiziu	10	PNB	shoulder	2	10:32:00	173481	8255771	23L	sirgass_2000	10:01:00	1	removed	1	0	15.2	20	17.1	18.32	91	8000	two_lane	2	DF_001	0	0.0403877	0.410339	0.126817	0.0355412	0.113893	0	0.256866	0
443	22	2014	december	spring	1	08_12_2014	wild	small_birds	Birds	Passeriformes	Emberizidae	Volatinia_jacariNA	Tiziu	10	PNB	shoulder	2	10:35:00	173446	8255853	23L	sirgass_2000	10:02:00	1	removed	1	0	15.2	20	17.1	18.32	91	8000	two_lane	2	DF_001	0	0.0355412	0.427302	0.124394	0.0339257	0.119548	0	0.243134	0
444	22	2014	december	spring	1	08_12_2014	wild	small_reptiles	Reptile	Squamata	Dipsadidae	Philodryas_patagoniensis	Cobra_cipo	150	PNB	shoulder	2	12:05:00	186708	8268757	23L	sirgass_2000	11:24:00	1	removed	1	0	15.2	20	17.1	18.32	91	775	two_lane	2	DF_001	0	0.0106209	0.495915	0	0.0269608	0.0122549	0	0.371732	0.0686275
445	22	2014	december	spring	1	08_12_2014	domestic	small_birds	Ave	Passeriformes	Passeridae	Passer_domesticus	Pardal	26	ESECAE	shoulder	2	13:21:00	220259	8273993	23L	sirgass_2000	13:11:00	1	removed	1	0	15.2	20	17.1	18.32	91	5000	four_lane	3	BR_010_BR_020_BR_030	0	0.0306452	0.492742	0	0.0395161	0	0	0.404839	0
446	22	2014	december	spring	1	08_12_2014	domestic	medium_mammals	Mammals	Carnivora	Felidae	Felis_catus	Gato_Domestico	5000	ESECAE	lane	1	13:23:00	220283	8273998	23L	sirgass_2000	10:10:00	96	remained	0	4	15.2	20	17.1	18.32	91	5000	four_lane	3	BR_010_BR_020_BR_030	0	0.0291498	0.493927	0	0.0396761	0	0	0.404858	0
447	22	2014	december	spring	1	08_12_2014	wild	small_reptiles	Reptile	Squamata	Dipsadidae	NA	Coral_falsa	80	ESECAE	shoulder	2	13:24:00	220283	8273998	23L	sirgass_2000	10:10:00	72	removed	1	3	15.2	20	17.1	18.32	91	5000	four_lane	3	BR_010_BR_020_BR_030	0	0.0291498	0.493927	0	0.0396761	0	0	0.404858	0
448	22	2014	december	spring	1	08_12_2014	domestic	medium_mammals	Mammals	Carnivora	Felidae	Felis_catus	Gato_Domestico	5000	ESECAE	shoulder	2	13:45:00	213386	8276064	23L	sirgass_2000	10:27:00	96	remained	0	4	15.2	20	17.1	18.32	91	2600	two_lane	2	DF_128	0.0362611	0.193392	0.35133	0	0.0459307	0	0	0.281225	0.077357
449	22	2014	december	spring	1	09_12_2014	domestic	medium_mammals	Mammals	Carnivora	Felidae	Felis_catus	Gato_Domestico	5000	JBB	shoulder	2	08:15:00	197217	8237789	23L	sirgass_2000	08:17:00	72	removed	1	3	3.4	22.5	17.5	19.8	81.75	7000	four_lane	3	DF_001	0	0.0848142	0.760905	0	0.0315024	0.0193861	0.00646204	0.0718901	0
450	22	2014	december	spring	1	09_12_2014	wild	small_birds	Birds	Columbiforme	Columbidae	NA	Rolinha	40	JBB	lane	1	08:30:00	196280	8236720	23L	sirgass_2000	08:50:00	1	removed	1	0	3.4	22.5	17.5	19.8	81.75	2000	two_lane	2	DF_001	0	0.0893582	0.642567	0	0.0138099	0.0121852	0.00974817	0.201462	0
451	22	2014	december	spring	1	09_12_2014	domestic	Large_mammals	Mammals	Carnivora	Canidae	Canis_familiaris	Cachorro_Domestico	10000	PNB	shoulder	2	09:56:00	173578	8255490	23L	sirgass_2000	09:22:00	24	removed	1	1	3.4	22.5	17.5	19.8	81.75	8000	two_lane	2	DF_001	0	0.0509297	0.3654	0.127728	0.0355699	0.0953921	0	0.308812	0
452	22	2014	december	spring	1	09_12_2014	wild	small_birds	Birds	Caprimulgiforme	Caprimulgidae	NA	Bacurau	45	PNB	lane	1	10:53:00	176937	8275370	23L	sirgass_2000	10:53:00	1	removed	1	0	3.4	22.5	17.5	19.8	81.75	775	two_lane	2	DF_001	0	0.0751212	0.279483	0	0.00484653	0.0234249	0	0.482229	0.116317
453	22	2014	december	spring	1	09_12_2014	wild	small_birds	Birds	Passeriformes	Emberizidae	Volatinia_jacariNA	Tiziu	10	PNB	lane	1	11:06:00	183421	8271172	23L	sirgass_2000	11:08:00	1	removed	1	0	3.4	22.5	17.5	19.8	81.75	775	two_lane	2	DF_001	0	0.00322581	0.375	0	0.11371	0.0145161	0	0.479839	0
454	22	2014	december	spring	1	09_12_2014	wild	small_birds	Birds	Passeriformes	Tyrannidae	Tyrannus_savana	Tesourinha	33	ESECAE	lane	1	12:45:00	219270	8273733	23L	sirgass_2000	12:50:00	1	removed	1	0	3.4	22.5	17.5	19.8	81.75	5000	four_lane	3	BR_010_BR_020_BR_030	0	0.038835	0.62055	0	0.0453074	0	0.0113269	0.251618	0
455	22	2014	december	spring	1	09_12_2014	wild	small_birds	Birds	Passeriformes	NA	NA	Passeriforme	25	ESECAE	shoulder	2	13:03:00	223443	8274984	23L	sirgass_2000	10:05:00	72	removed	1	3	3.4	22.5	17.5	19.8	81.75	5000	four_lane	3	BR_010_BR_020_BR_030	0	0.0219156	0.469156	0	0	0.000811688	0	0.459416	0
456	22	2014	december	spring	1	09_12_2014	domestic	large_birds	Ave	Galliforme	Phasianidae	Gallus_gallus_domesticus	Galinha	1500	ESECAE	shoulder	2	13:23:00	213997	8274096	23L	sirgass_2000	10:18:00	72	removed	1	3	3.4	22.5	17.5	19.8	81.75	5000	four_lane	3	BR_010_BR_020_BR_030	0	0.256285	0.323601	0	0.0997567	0.00648824	0.184915	0.0332522	0.0470397
457	22	2014	december	spring	1	10_12_2014	wild	small_reptiles	Reptile	Squamata	Dipsadidae	Oxyrhopus_guibei	Coral_falsa	80	JBB	shoulder	2	08:30:00	197519	8238364	23L	sirgass_2000	07:55:00	1	removed	1	0	3.6	24.7	17.9	20.78	76.5	7000	four_lane	3	DF_001	0	0.161526	0.741883	0	0.0349026	0.0154221	0	0.0227273	0
458	22	2014	december	spring	1	10_12_2014	wild	small_birds	Birds	Passeriformes	Emberizidae	Volatinia_jacariNA	Tiziu	10	IBGE	shoulder	2	09:01:00	192968	8233760	23L	sirgass_2000	08:14:00	1	removed	1	0	3.6	24.7	17.9	20.78	76.5	2000	two_lane	2	BR_251	0	0.092233	0.414239	0	0.0412621	0.026699	0.00809061	0.381068	0.0202265
459	22	2014	december	spring	1	10_12_2014	wild	small_birds	Birds	Passeriformes	Tyrannidae	Tyrannus_savana	Tesourinha	33	ESECAE	shoulder	2	12:54:00	220473	8274007	23L	sirgass_2000	10:13:00	48	removed	1	2	3.6	24.7	17.9	20.78	76.5	5000	four_lane	3	BR_010_BR_020_BR_030	0	0.02589	0.479773	0	0.0380259	0	0	0.423948	0
460	22	2014	december	spring	1	10_12_2014	wild	small_birds	Birds	Passeriformes	Emberizidae	Volatinia_jacariNA	Tiziu	10	ESECAE	lane	1	13:05:00	223735	8275072	23L	sirgass_2000	11:27:00	1	removed	1	0	3.6	24.7	17.9	20.78	76.5	5000	four_lane	3	BR_010_BR_020_BR_030	0	0.0218978	0.442011	0	0.00324412	0.00081103	0	0.481752	0
461	23	2015	january	summer	2	12_01_2015	domestic	large_birds	Ave	Galliforme	Phasianidae	Gallus_gallus_domesticus	Galinha	1500	ESECAE	shoulder	2	09:22:00	214242	8274096	23L	sirgass_2000	09:17:00	96	remained	0	4	0	30.9	20.2	25.92	46.25	5000	four_lane	3	BR_010_BR_020_BR_030	0	0.231826	0.336026	0	0.1042	0.00484653	0.196284	0.0290792	0.0508885
462	23	2015	january	summer	2	12_01_2015	domestic	Large_mammals	Mammals	Carnivora	Canidae	Canis_familiaris	Cachorro_Domestico	10000	ESECAE	shoulder	2	09:48:00	221724	8274444	23L	sirgass_2000	09:27:00	96	remained	0	4	0	30.9	20.2	25.92	46.25	5000	four_lane	3	BR_010_BR_020_BR_030	0	0.00646726	0.473727	0	0.00565885	0	0	0.481811	0
463	23	2015	january	summer	2	12_01_2015	wild	small_birds	Birds	Passeriformes	Emberizidae	Volatinia_jacariNA	Tiziu	10	ESECAE	lane	1	10:07:00	212726	8275383	23L	sirgass_2000	09:44:00	72	removed	1	3	0	30.9	20.2	25.92	46.25	2600	two_lane	2	DF_128	0.103393	0.299677	0.289176	0	0.03958	0	0.0121163	0.19063	0.0363489
464	23	2015	january	summer	2	12_01_2015	wild	small_birds	Birds	Cuculiforme	Cuculidae	Crotophaga_ani	Anu_preto	100	ESECAE	shoulder	2	10:12:00	213377	8276053	23L	sirgass_2000	10:09:00	48	removed	1	2	0	30.9	20.2	25.92	46.25	2600	two_lane	2	DF_128	0.0370669	0.19581	0.349718	0	0.0459307	0	0	0.280419	0.0765512
465	23	2015	january	summer	2	12_01_2015	wild	small_birds	Birds	Passeriformes	Emberizidae	Volatinia_jacariNA	Tiziu	10	ESECAE	shoulder	2	10:17:00	214406	8277113	23L	sirgass_2000	09:43:00	1	removed	1	0	0	30.9	20.2	25.92	46.25	2600	two_lane	2	DF_128	0	0.0928168	0.422115	0	0.0153349	0.00403551	0	0.257466	0.196933
466	23	2015	january	summer	2	12_01_2015	wild	Large_reptiles	Reptile	Squamata	Viperidae	Crotalus_durissus	Cascavel	550	ESECAE	shoulder	2	10:25:00	216735	8279509	23L	sirgass_2000	10:29:00	48	removed	1	2	0	30.9	20.2	25.92	46.25	2600	two_lane	2	DF_128	0	0.0711974	0.493528	0	0.0428803	0.00485437	0	0.359223	0.0177994
467	23	2015	january	summer	2	12_01_2015	wild	small_birds	Birds	Passeriformes	NA	NA	Passeriforme	25	ESECAE	lane	1	10:30:00	217651	8280451	23L	sirgass_2000	10:34:00	24	removed	1	1	0	30.9	20.2	25.92	46.25	2600	two_lane	2	DF_128	0	0.111916	0.466989	0	0.031401	0.0289855	0	0.334944	0
468	23	2015	january	summer	2	12_01_2015	wild	small_birds	Birds	Passeriformes	NA	NA	Passeriforme	25	PNB	lane	1	12:21:00	182439	8271916	23L	sirgass_2000	11:23:00	1	removed	1	0	0	30.9	20.2	25.92	46.25	775	two_lane	2	DF_001	0	0.00649351	0.386364	0	0.105519	0.0219156	0	0.465909	0
469	23	2015	january	summer	2	12_01_2015	wild	large_birds	Birds	Accipitriformes	Accipitridae	Geranoaetus_albicaudatus	Gaviao_de_rabo_branco	900	PNB	lane	1	12:40:00	174772	8273270	23L	sirgass_2000	13:47:00	24	removed	1	1	0	30.9	20.2	25.92	46.25	775	dirt_road	1	DF_001	0	0.0945837	0.353274	0	0.065481	0.263541	0	0.0315279	0.1827
470	23	2015	january	summer	2	12_01_2015	wild	small_birds	Birds	Passeriformes	Emberizidae	Volatinia_jacariNA	Tiziu	10	JBB	lane	1	14:29:00	193342	8234080	23L	sirgass_2000	11:31:00	96	remained	0	4	0	30.9	20.2	25.92	46.25	2000	two_lane	2	BR_251	0	0.107143	0.425325	0	0.0487013	0.0146104	0.00811688	0.340909	0.0349026
471	23	2015	january	summer	2	12_01_2015	wild	small_birds	Birds	Passeriformes	Emberizidae	Volatinia_jacariNA	Tiziu	10	JBB	lane	1	14:42:00	197199	8237752	23L	sirgass_2000	14:05:00	1	removed	1	0	0	30.9	20.2	25.92	46.25	7000	four_lane	3	DF_001	0	0.0786062	0.762561	0	0.0307942	0.0186386	0.00729335	0.076175	0
472	23	2015	january	summer	2	13_01_2015	wild	Large_reptiles	Reptile	Squamata	Viperidae	Crotalus_durissus	Cascavel	550	ESECAE	shoulder	2	09:39:00	213511	8276191	23L	sirgass_2000	10:09:00	1	removed	1	0	0	31	18.2	23.96	58	2600	two_lane	2	DF_128	0.0241935	0.166129	0.364516	0	0.0451613	0	0	0.285484	0.0991935
473	23	2015	january	summer	2	13_01_2015	wild	small_birds	Birds	Passeriformes	NA	NA	Passeriforme	25	PNB	lane	1	11:13:00	184091	8270694	23L	sirgass_2000	12:34:00	1	removed	1	0	0	31	18.2	23.96	58	775	two_lane	2	DF_001	0	0.00161812	0.364887	0	0.110032	0.0250809	0	0.484628	0
474	23	2015	january	summer	2	13_01_2015	wild	small_birds	Birds	Passeriformes	Emberizidae	Volatinia_jacariNA	Tiziu	10	PNB	lane	1	11:16:00	183858	8270865	23L	sirgass_2000	12:37:00	1	removed	1	0	0	31	18.2	23.96	58	775	two_lane	2	DF_001	0	0.00324675	0.36039	0	0.121753	0.0194805	0	0.482143	0
475	23	2015	january	summer	2	13_01_2015	wild	small_birds	Birds	Passeriformes	Emberizidae	Volatinia_jacariNA	Tiziu	10	PNB	lane	1	12:16:00	173426	8255870	23L	sirgass_2000	10:41:00	72	removed	1	3	0	31	18.2	23.96	58	8000	two_lane	2	DF_001	0	0.0356564	0.429498	0.126418	0.0372771	0.119935	0	0.235818	0
476	23	2015	january	summer	2	13_01_2015	domestic	medium_mammals	Mammals	Carnivora	Felidae	Felis_catus	Gato_Domestico	5000	FAL	shoulder	2	13:31:00	180594	8231463	23L	sirgass_2000	11:20:00	72	removed	1	3	0	31	18.2	23.96	58	2000	two_lane	2	BR_251	0.000810373	0.0307942	0.633712	0	0.0567261	0.141815	0.0340357	0.0453809	0
477	23	2015	january	summer	2	14_01_2015	wild	small_reptiles	Reptile	Squamata	Dipsadidae	Oxyrhopus_guibei	Coral_falsa	80	ESECAE	shoulder	2	09:43:00	213881	8274068	23L	sirgass_2000	09:35:00	48	removed	1	2	0	30.3	18	24.6	42.25	5000	four_lane	3	BR_010_BR_020_BR_030	0	0.271994	0.307506	0	0.0984665	0.00968523	0.183212	0.0387409	0.0419693
478	23	2015	january	summer	2	14_01_2015	domestic	medium_mammals	Mammals	Carnivora	Felidae	Felis_catus	Gato_Domestico	5000	ESECAE	lane	1	09:47:00	213664	8274006	23L	sirgass_2000	09:58:00	1	removed	1	0	0	30.3	18	24.6	42.25	5000	four_lane	3	BR_010_BR_020_BR_030	0	0.293785	0.288943	0	0.0936239	0.0145278	0.187248	0.0419693	0.0306699
479	23	2015	january	summer	2	14_01_2015	wild	small_birds	Birds	Caprimulgiforme	Caprimulgidae	NA	Bacurau	45	ESECAE	lane	1	09:55:00	213107	8273764	23L	sirgass_2000	09:37:00	48	removed	1	2	0	30.3	18	24.6	42.25	2600	two_lane	2	DF_128	0	0.32711	0.227273	0	0.0852273	0.0146104	0.226461	0.0430195	0.0251623
480	23	2015	january	summer	2	14_01_2015	wild	small_mammals	Mammals	Primates	Cebidae	Callithrix_penicillata	Sagui	400	ESECAE	shoulder	2	09:57:00	213005	8273872	23L	sirgass_2000	09:37:00	48	removed	1	2	0	30.3	18	24.6	42.25	2600	two_lane	2	DF_128	0	0.343296	0.228595	0	0.0799677	0.0145396	0.212439	0.0403877	0.0306947
481	23	2015	january	summer	2	14_01_2015	wild	small_birds	Birds	Apodiforme	Trochilidae	NA	Beija_flor	8	ESECAE	lane	1	10:17:00	215135	8277862	23L	sirgass_2000	09:47:00	48	removed	1	2	0	30.3	18	24.6	42.25	2600	two_lane	2	DF_128	0	0.079646	0.461786	0	0.0152856	0.00482703	0	0.181014	0.241352
482	23	2015	january	summer	2	14_01_2015	wild	small_birds	Birds	Passeriformes	Emberizidae	Volatinia_jacariNA	Tiziu	10	ESECAE	shoulder	2	10:22:00	216000	8278752	23L	sirgass_2000	10:24:00	1	removed	1	0	0	30.3	18	24.6	42.25	2600	two_lane	2	DF_128	0	0.0591572	0.495138	0	0.0226904	0.00486224	0	0.254457	0.149109
483	23	2015	january	summer	2	14_01_2015	wild	small_birds	Birds	Passeriformes	Emberizidae	Volatinia_jacariNA	Tiziu	10	ESECAE	shoulder	2	10:24:00	216021	8278773	23L	sirgass_2000	10:25:00	1	removed	1	0	0	30.3	18	24.6	42.25	2600	two_lane	2	DF_128	0	0.0596774	0.495968	0	0.0225806	0.00483871	0	0.258065	0.144355
484	23	2015	january	summer	2	14_01_2015	wild	small_birds	Birds	Passeriformes	Emberizidae	Volatinia_jacariNA	Tiziu	10	ESECAE	lane	1	10:31:00	217435	8280230	23L	sirgass_2000	09:52:00	48	removed	1	2	0	30.3	18	24.6	42.25	2600	two_lane	2	DF_128	0	0.105605	0.483347	0	0.0324939	0.0178716	0	0.3355	0
485	23	2015	january	summer	2	14_01_2015	wild	large_birds	Birds	Cariamiformes	Cariamidae	Cariama_cristata	Siriema	1500	PNB	shoulder	2	11:40:00	191136	8265478	23L	sirgass_2000	11:50:00	1	removed	1	0	0	30.3	18	24.6	42.25	775	two_lane	2	DF_001	0.00162602	0.0260163	0.677236	0	0.0577236	0.189431	0.0178862	0.0178862	0
486	23	2015	january	summer	2	14_01_2015	wild	small_birds	Birds	Passeriformes	Emberizidae	Volatinia_jacariNA	Tiziu	10	PNB	lane	1	11:55:00	187558	8268142	23L	sirgass_2000	11:59:00	1	removed	1	0	0	30.3	18	24.6	42.25	775	two_lane	2	DF_001	0	0.0227088	0.623682	0	0.0235199	0.00729927	0	0.240876	0.0681265
487	23	2015	january	summer	2	14_01_2015	domestic	medium_mammals	Mammals	Carnivora	Felidae	Felis_catus	Gato_Domestico	5000	PNB	lane	1	12:45:00	181380	8272725	23L	sirgass_2000	12:56:00	1	removed	1	0	0	30.3	18	24.6	42.25	775	two_lane	2	DF_001	0	0.0576767	0.429732	0	0.077173	0.0203087	0	0.402924	0
488	23	2015	january	summer	2	14_01_2015	wild	small_birds	Birds	Passeriformes	NA	NA	Passeriforme	25	FAL	lane	1	14:50:00	188289	8231476	23L	sirgass_2000	14:57:00	1	removed	1	0	0	30.3	18	24.6	42.25	2000	two_lane	2	BR_251	0	0.0292208	0.94237	0	0.00405844	0.00892857	0	0.00324675	0
489	23	2015	january	summer	2	14_01_2015	wild	small_birds	Birds	Passeriformes	Emberizidae	Volatinia_jacariNA	Tiziu	10	FAL	lane	1	14:54:00	188307	8231483	23L	sirgass_2000	14:58:00	1	removed	1	0	0	30.3	18	24.6	42.25	2000	two_lane	2	BR_251	0	0.0290323	0.941935	0	0.00403226	0.00887097	0	0.00403226	0
490	23	2015	january	summer	2	14_01_2015	wild	small_birds	Birds	Passeriformes	Emberizidae	Volatinia_jacariNA	Tiziu	10	IBGE	lane	1	15:06:00	193197	8233950	23L	sirgass_2000	11:31:00	24	removed	1	1	0	30.3	18	24.6	42.25	2000	two_lane	2	BR_251	0	0.0998377	0.420455	0	0.049513	0.0162338	0.00811688	0.356331	0.0300325
491	23	2015	january	summer	2	14_01_2015	wild	small_birds	Birds	Passeriformes	Emberizidae	Volatinia_jacariNA	Tiziu	10	JBB	shoulder	2	15:19:00	197595	8238506	23L	sirgass_2000	15:30:00	1	removed	1	0	0	30.3	18	24.6	42.25	7000	four_lane	3	DF_001	0	0.170178	0.729335	0	0.0356564	0.0145867	0	0.0275527	0
492	24	2015	february	summer	2	09_02_2015	wild	small_birds	Birds	Passeriformes	Emberizidae	Volatinia_jacariNA	Tiziu	10	JBB	lane	1	08:18:00	197924	8241125	23L	sirgass_2000	08:00:00	1	removed	1	0	1.2	25.6	17.4	21.06	77.75	7000	four_lane	3	DF_001	0	0.0725806	0.445968	0	0.0177419	0.0266129	0.184677	0.221774	0
493	24	2015	february	summer	2	09_02_2015	wild	small_birds	Birds	Passeriformes	Emberizidae	Volatinia_jacariNA	Tiziu	10	FAL	lane	1	09:05:00	183685	8231077	23L	sirgass_2000	10:02:00	96	remained	0	4	1.2	25.6	17.4	21.06	77.75	2000	two_lane	2	BR_251	0.00162734	0.0276648	0.679414	0	0.0976404	0.0431245	0.00406835	0.107404	0
494	24	2015	february	summer	2	09_02_2015	wild	small_birds	Birds	Passeriformes	Emberizidae	Volatinia_jacariNA	Tiziu	10	FAL	lane	1	09:08:00	183374	8231187	23L	sirgass_2000	10:07:00	48	removed	1	2	1.2	25.6	17.4	21.06	77.75	2000	two_lane	2	BR_251	0.00162075	0.034846	0.646677	0	0.0883306	0.0518639	0.0178282	0.117504	0
495	24	2015	february	summer	2	09_02_2015	domestic	large_birds	Ave	Galliforme	Phasianidae	Gallus_gallus_domesticus	Galinha	1500	PNB	shoulder	2	09:52:00	173410	8253098	23L	sirgass_2000	09:58:00	1	removed	1	0	1.2	25.6	17.4	21.06	77.75	8000	two_lane	2	DF_001	0	0.169355	0.199194	0.152419	0.0266129	0.114516	0.0645161	0.23871	0.000806452
496	24	2015	february	summer	2	09_02_2015	wild	small_birds	Birds	Passeriformes	Emberizidae	Volatinia_jacariNA	Tiziu	10	PNB	lane	1	10:09:00	169061	8260690	23L	sirgass_2000	11:00:00	24	removed	1	1	1.2	25.6	17.4	21.06	77.75	775	two_lane	2	DF_001	0	0.0929669	0.368634	0	0.0541633	0.0889248	0	0.265158	0.112369
497	24	2015	february	summer	2	09_02_2015	wild	small_birds	Birds	Passeriformes	Emberizidae	Volatinia_jacariNA	Tiziu	10	PNB	shoulder	2	10:53:00	181634	8272515	23L	sirgass_2000	11:00:00	1	removed	1	0	1.2	25.6	17.4	21.06	77.75	775	two_lane	2	DF_001	0	0.0331715	0.425566	0	0.0833333	0.0234628	0	0.420712	0
498	24	2015	february	summer	2	09_02_2015	wild	small_birds	Birds	Passeriformes	Emberizidae	Volatinia_jacariNA	Tiziu	10	PNB	lane	1	11:12:00	186328	8269034	23L	sirgass_2000	12:24:00	24	removed	1	1	1.2	25.6	17.4	21.06	77.75	775	two_lane	2	DF_001	0	0.00728745	0.439676	0	0.0348178	0.0226721	0	0.415385	0.0663968
499	24	2015	february	summer	2	09_02_2015	wild	small_birds	Birds	NA	NA	NA	Ave_silvestre	NA	PNB	lane	1	11:14:00	186427	8268962	23L	sirgass_2000	13:10:00	48	removed	1	2	1.2	25.6	17.4	21.06	77.75	775	two_lane	2	DF_001	0	0.00887813	0.448749	0	0.0338983	0.0209847	0	0.405165	0.0686037
500	24	2015	february	summer	2	09_02_2015	wild	small_birds	Birds	Passeriformes	Emberizidae	Volatinia_jacariNA	Tiziu	10	ESECAE	shoulder	2	12:30:00	212530	8274840	23L	sirgass_2000	13:36:00	1	removed	1	0	1.2	25.6	17.4	21.06	77.75	2600	two_lane	2	DF_128	0.11129	0.316129	0.241129	0	0.0467742	0	0.0879032	0.119355	0.0362903
501	24	2015	february	summer	2	09_02_2015	wild	small_birds	Birds	Passeriformes	Emberizidae	Volatinia_jacariNA	Tiziu	10	ESECAE	lane	1	13:11:00	225775	8277949	23L	sirgass_2000	14:33:00	1	removed	1	0	1.2	25.6	17.4	21.06	77.75	951	two_lane	2	BR_010_DF_345	0	0.0137207	0.457627	0	0.031477	0.0298628	0	0.440678	0
502	24	2015	february	summer	2	09_02_2015	wild	small_birds	Birds	Passeriformes	Emberizidae	Volatinia_jacariNA	Tiziu	10	ESECAE	shoulder	2	13:18:00	224261	8275897	23L	sirgass_2000	14:43:00	1	removed	1	0	1.2	25.6	17.4	21.06	77.75	951	two_lane	2	BR_010_DF_345	0	0.0242131	0.529459	0	0.00484262	0.000807103	0	0.393866	0
503	24	2015	february	summer	2	10_02_2015	wild	Large_reptiles	Reptile	Squamata	Colubridae	Mastigodryas_bifossatus	Jararacucu_do_brejo	250	JBB	shoulder	2	08:10:00	197484	8238298	23L	sirgass_2000	08:45:00	1	removed	1	0	0	27.4	18.8	21.94	79.25	7000	four_lane	3	DF_001	0	0.158023	0.744733	0	0.0356564	0.0162075	0	0.0226904	0
504	24	2015	february	summer	2	10_02_2015	wild	small_birds	Birds	Passeriformes	Emberizidae	Volatinia_jacariNA	Tiziu	10	JBB	lane	1	08:16:00	197567	8238459	23L	sirgass_2000	08:47:00	1	removed	1	0	0	27.4	18.8	21.94	79.25	7000	four_lane	3	DF_001	0	0.168285	0.735437	0	0.0364078	0.0145631	0	0.0242718	0
505	24	2015	february	summer	2	10_02_2015	wild	small_birds	Birds	Passeriformes	Emberizidae	Volatinia_jacariNA	Tiziu	10	JBB	shoulder	2	08:23:00	197940	8241220	23L	sirgass_2000	08:54:00	1	removed	1	0	0	27.4	18.8	21.94	79.25	7000	four_lane	3	DF_001	0	0.0642276	0.438211	0	0.0203252	0.0300813	0.195935	0.219512	0
506	24	2015	february	summer	2	10_02_2015	wild	small_birds	Birds	Passeriformes	Emberizidae	Volatinia_jacariNA	Tiziu	10	JBB	shoulder	2	08:29:00	196568	8236913	23L	sirgass_2000	08:59:00	1	removed	1	0	0	27.4	18.8	21.94	79.25	2000	two_lane	2	DF_001	0	0.0787338	0.651786	0	0.0178571	0.0194805	0.0146104	0.185065	0
507	24	2015	february	summer	2	10_02_2015	wild	small_birds	Birds	Passeriformes	Emberizidae	Volatinia_jacariNA	Tiziu	10	FAL	shoulder	2	08:45:00	189833	8232092	23L	sirgass_2000	09:15:00	1	removed	1	0	0	27.4	18.8	21.94	79.25	2000	two_lane	2	BR_251	0	0.0453441	0.740891	0	0.0404858	0.017004	0	0.14332	0
508	24	2015	february	summer	2	10_02_2015	wild	large_birds	Birds	Strigiforme	Strigidae	Asio_clamator	Coruja_orelhuda	400	FAL	shoulder	2	08:48:00	189444	8231941	23L	sirgass_2000	09:17:00	1	removed	1	0	0	27.4	18.8	21.94	79.25	2000	two_lane	2	BR_251	0	0.0339257	0.81664	0	0.0266559	0.0153473	0	0.095315	0
509	24	2015	february	summer	2	10_02_2015	wild	small_birds	Birds	Passeriformes	Emberizidae	Volatinia_jacariNA	Tiziu	10	FAL	lane	1	08:50:00	189432	8231937	23L	sirgass_2000	09:55:00	72	removed	1	3	0	27.4	18.8	21.94	79.25	2000	two_lane	2	BR_251	0	0.0330645	0.817742	0	0.0266129	0.0153226	0	0.0951613	0
510	24	2015	february	summer	2	10_02_2015	wild	small_birds	Birds	Passeriformes	NA	NA	Passeriforme	25	FAL	lane	1	08:57:00	187826	8231306	23L	sirgass_2000	09:25:00	1	removed	1	0	0	27.4	18.8	21.94	79.25	2000	two_lane	2	BR_251	0	0.0380875	0.944895	0	0.000810373	0.00486224	0	0	0
511	24	2015	february	summer	2	10_02_2015	wild	large_birds	Birds	Strigiforme	Strigidae	NA	Coruja	200	FAL	shoulder	2	09:15:00	182644	8231440	23L	sirgass_2000	10:05:00	72	removed	1	3	0	27.4	18.8	21.94	79.25	2000	two_lane	2	BR_251	0.00161421	0.0347054	0.642454	0	0.0605327	0.0637611	0.0250202	0.126715	0
512	24	2015	february	summer	2	10_02_2015	wild	small_birds	Birds	Passeriformes	NA	NA	Passeriforme	25	PNB	shoulder	2	10:03:00	173710	8254418	23L	sirgass_2000	10:42:00	1	removed	1	0	0	27.4	18.8	21.94	79.25	8000	two_lane	2	DF_001	0	0.0871671	0.238902	0.130751	0.0363196	0.0492333	0	0.444713	0
513	24	2015	february	summer	2	10_02_2015	wild	small_birds	Birds	Passeriformes	Emberizidae	Volatinia_jacariNA	Tiziu	10	PNB	lane	1	10:11:00	171653	8257666	23L	sirgass_2000	10:49:00	1	removed	1	0	0	27.4	18.8	21.94	79.25	8000	two_lane	2	DF_001	0	0.0267423	0.431929	0.19611	0.100486	0.227715	0	0.00486224	0
514	24	2015	february	summer	2	10_02_2015	wild	small_birds	Birds	Passeriformes	Emberizidae	Volatinia_jacariNA	Tiziu	10	PNB	lane	1	11:19:00	185825	8269407	23L	sirgass_2000	12:21:00	1	removed	1	0	0	27.4	18.8	21.94	79.25	775	two_lane	2	DF_001	0	0.00324149	0.429498	0	0.0356564	0.0210697	0	0.448136	0.0502431
515	24	2015	february	summer	2	10_02_2015	wild	small_birds	Birds	Passeriformes	Emberizidae	Volatinia_jacariNA	Tiziu	10	PNB	lane	1	11:34:00	192253	8264505	23L	sirgass_2000	12:41:00	1	removed	1	0	0	27.4	18.8	21.94	79.25	775	two_lane	2	DF_001	0	0.110752	0.446241	0	0.0428456	0.206952	0.039612	0.0792239	0.0404204
516	24	2015	february	summer	2	10_02_2015	domestic	Large_mammals	Mammals	Carnivora	Canidae	Canis_familiaris	Cachorro_Domestico	10000	PNB	shoulder	2	11:36:00	192305	8264460	23L	sirgass_2000	12:42:00	1	removed	1	0	0	27.4	18.8	21.94	79.25	775	two_lane	2	DF_001	0	0.118699	0.429268	0	0.0430894	0.203252	0.0471545	0.0788618	0.0455285
517	24	2015	february	summer	2	10_02_2015	wild	small_reptiles	Reptile	Squamata	Teiidae	Ameiva_ameiva	Lagarto	22	ESECAE	lane	1	12:57:00	219917	8273830	23L	sirgass_2000	13:15:00	1	removed	1	0	0	27.4	18.8	21.94	79.25	5000	four_lane	3	BR_010_BR_020_BR_030	0	0.0362611	0.534247	0	0.0410959	0	0	0.356164	0
518	24	2015	february	summer	2	10_02_2015	wild	small_birds	Birds	Passeriformes	NA	NA	Passeriforme	25	ESECAE	lane	1	13:04:00	223204	8274874	23L	sirgass_2000	12:01:00	72	removed	1	3	0	27.4	18.8	21.94	79.25	5000	four_lane	3	BR_010_BR_020_BR_030	0	0.0201288	0.478261	0	0	0.000805153	0	0.453301	0
519	24	2015	february	summer	2	10_02_2015	wild	small_reptiles	Reptile	Squamata	Dipsadidae	Philodryas_olfersii	Cobra_verde	150	ESECAE	lane	1	13:21:00	216311	8274024	23L	sirgass_2000	13:41:00	1	removed	1	0	0	27.4	18.8	21.94	79.25	5000	four_lane	3	BR_010_BR_020_BR_030	0	0.16129	0.470968	0	0.0572581	0	0.226613	0.0016129	0.05
520	24	2015	february	summer	2	10_02_2015	wild	large_birds	Birds	Strigiforme	Strigidae	NA	Coruja	200	ESECAE	lane	1	13:30:00	213584	8273981	23L	sirgass_2000	13:51:00	1	removed	1	0	0	27.4	18.8	21.94	79.25	5000	four_lane	3	BR_010_BR_020_BR_030	0	0.304878	0.282114	0	0.0918699	0.0146341	0.186179	0.0422764	0.0276423
521	24	2015	february	summer	2	10_02_2015	wild	small_birds	Birds	Passeriformes	NA	NA	Passeriforme	25	ESECAE	lane	1	13:40:00	212539	8274999	23L	sirgass_2000	14:09:00	1	removed	1	0	0	27.4	18.8	21.94	79.25	2600	two_lane	2	DF_128	0.119644	0.310428	0.256265	0	0.0468876	0	0.0606306	0.132579	0.0355699
522	24	2015	february	summer	2	10_02_2015	wild	small_birds	Birds	Passeriformes	NA	NA	Passeriforme	25	ESECAE	lane	1	13:42:00	212543	8275008	23L	sirgass_2000	14:46:00	24	removed	1	1	0	27.4	18.8	21.94	79.25	2600	two_lane	2	DF_128	0.119644	0.30962	0.256265	0	0.0468876	0	0.0590137	0.135004	0.0355699
523	24	2015	february	summer	2	10_02_2015	wild	small_birds	Birds	Passeriformes	Emberizidae	Sporophila_caerulescens	Coleirinho	8	ESECAE	shoulder	2	13:49:00	212625	8275240	23L	sirgass_2000	14:12:00	1	removed	1	0	0	27.4	18.8	21.94	79.25	2600	two_lane	2	DF_128	0.115789	0.305263	0.276113	0	0.0404858	0	0.0275304	0.165182	0.0356275
524	24	2015	february	summer	2	10_02_2015	wild	small_birds	Birds	Passeriformes	Emberizidae	Volatinia_jacariNA	Tiziu	10	ESECAE	lane	1	13:49:00	213116	8275785	23L	sirgass_2000	14:51:00	24	removed	1	1	0	27.4	18.8	21.94	79.25	2600	two_lane	2	DF_128	0.0654281	0.240711	0.32391	0	0.0452342	0	0	0.261712	0.0403877
525	24	2015	february	summer	2	10_02_2015	wild	small_birds	Birds	Passeriformes	Emberizidae	Volatinia_jacariNA	Tiziu	10	ESECAE	lane	1	13:49:00	213592	8276275	23L	sirgass_2000	14:17:00	1	removed	1	0	0	27.4	18.8	21.94	79.25	2600	two_lane	2	DF_128	0.0153846	0.150607	0.375709	0	0.042915	0	0	0.287449	0.112551
526	24	2015	february	summer	2	10_02_2015	wild	small_birds	Birds	Passeriformes	NA	NA	Passeriforme	25	ESECAE	lane	1	14:01:00	217489	8280287	23L	sirgass_2000	12:25:00	72	removed	1	3	0	27.4	18.8	21.94	79.25	2600	two_lane	2	DF_128	0	0.108327	0.478577	0	0.0323363	0.0202102	0	0.334681	0
527	24	2015	february	summer	2	10_02_2015	wild	small_birds	Birds	Passeriformes	NA	NA	Passeriforme	25	ESECAE	lane	1	14:04:00	217928	8280737	23L	sirgass_2000	14:36:00	1	removed	1	0	0	27.4	18.8	21.94	79.25	2600	two_lane	2	DF_128	0	0.112642	0.449757	0	0.0291734	0.0364668	0	0.345219	0
528	24	2015	february	summer	2	10_02_2015	wild	small_birds	Birds	Passeriformes	Emberizidae	Volatinia_jacariNA	Tiziu	10	ESECAE	shoulder	2	14:37:00	225054	8276972	23L	sirgass_2000	15:11:00	1	removed	1	0	0	27.4	18.8	21.94	79.25	951	two_lane	2	BR_010_DF_345	0	0.0194489	0.503241	0	0.00162075	0	0	0.431118	0
529	24	2015	february	summer	2	10_02_2015	wild	small_birds	Birds	Passeriformes	Emberizidae	Volatinia_jacariNA	Tiziu	10	ESECAE	shoulder	2	14:39:00	224945	8276818	23L	sirgass_2000	15:12:00	1	removed	1	0	0	27.4	18.8	21.94	79.25	951	two_lane	2	BR_010_DF_345	0	0.0202758	0.51987	0	0	0	0	0.413625	0
530	24	2015	february	summer	2	11_02_2015	wild	medium_mammals	Mammals	Carnivora	Canidae	Pseudalopex_vetulus	Raposinha	3400	JBB	lane	1	08:37:00	197622	8238652	23L	sirgass_2000	09:44:00	48	removed	1	2	0.3	28.7	18.7	23.4	64	7000	four_lane	3	DF_001	0	0.173701	0.717532	0	0.0332792	0.0154221	0	0.0381494	0
531	24	2015	february	summer	2	11_02_2015	wild	small_birds	Birds	Passeriformes	Emberizidae	Volatinia_jacariNA	Tiziu	10	FAL	lane	1	09:21:00	189204	8231850	23L	sirgass_2000	09:46:00	1	removed	1	0	0.3	28.7	18.7	23.4	64	2000	two_lane	2	BR_251	0	0.029316	0.852606	0	0.0203583	0.0138436	0	0.0716612	0
532	24	2015	february	summer	2	11_02_2015	wild	small_birds	Birds	Galbuliforme	Bucconidae	Nystalus_chacuru	joao_bobo	64	PNB	shoulder	2	10:27:00	173334	8252912	23L	sirgass_2000	10:46:00	24	removed	1	1	0.3	28.7	18.7	23.4	64	8000	two_lane	2	DF_001	0	0.174089	0.192713	0.148988	0.0259109	0.11417	0.102024	0.20081	0.00242915
533	24	2015	february	summer	2	11_02_2015	wild	small_birds	Birds	Passeriformes	Emberizidae	Volatinia_jacariNA	Tiziu	10	PNB	shoulder	2	10:32:00	173614	8253664	23L	sirgass_2000	11:12:00	1	removed	1	0	0.3	28.7	18.7	23.4	64	8000	two_lane	2	DF_001	0	0.155718	0.208435	0.151663	0.0324412	0.081103	0.00324412	0.347932	0
534	24	2015	february	summer	2	11_02_2015	wild	small_birds	Birds	Passeriformes	Emberizidae	Volatinia_jacariNA	Tiziu	10	PNB	shoulder	2	10:40:00	173717	8254283	23L	sirgass_2000	10:49:00	48	removed	1	2	0.3	28.7	18.7	23.4	64	8000	two_lane	2	DF_001	0	0.0984665	0.230831	0.128329	0.0355125	0.0460048	0	0.447942	0
535	24	2015	february	summer	2	11_02_2015	wild	small_birds	Birds	Passeriformes	Emberizidae	Volatinia_jacariNA	Tiziu	10	PNB	shoulder	2	11:15:00	168851	8263149	23L	sirgass_2000	11:51:00	1	removed	1	0	0.3	28.7	18.7	23.4	64	775	two_lane	2	DF_001	0	0.133172	0.458434	0	0.0298628	0.0613398	0	0.255851	0.0371267
536	24	2015	february	summer	2	11_02_2015	wild	small_birds	Birds	Passeriformes	Emberizidae	Volatinia_jacariNA	Tiziu	10	PNB	shoulder	2	11:15:00	168851	8263149	23L	sirgass_2000	11:51:00	1	removed	1	0	0.3	28.7	18.7	23.4	64	775	two_lane	2	DF_001	0	0.133172	0.458434	0	0.0298628	0.0613398	0	0.255851	0.0371267
537	24	2015	february	summer	2	11_02_2015	wild	small_birds	Birds	Passeriformes	Emberizidae	Volatinia_jacariNA	Tiziu	10	PNB	lane	1	12:28:00	186525	8268890	23L	sirgass_2000	13:12:00	48	removed	1	2	0.3	28.7	18.7	23.4	64	775	two_lane	2	DF_001	0	0.00968523	0.460856	0	0.0322841	0.0185634	0	0.397094	0.0686037
538	24	2015	february	summer	2	11_02_2015	wild	small_mammals	Mammals	Didelphimorphia	Didelphidae	Didelphis_albiventris	Gamba_ou_Sarue_	900	ESECAE	shoulder	2	13:49:00	213682	8274011	23L	sirgass_2000	14:35:00	48	removed	1	2	0.3	28.7	18.7	23.4	64	5000	four_lane	3	BR_010_BR_020_BR_030	0	0.293927	0.289879	0	0.0931174	0.0145749	0.186235	0.0421053	0.0307692
539	24	2015	february	summer	2	11_02_2015	wild	large_birds	Birds	Strigiforme	Strigidae	NA	Coruja	200	ESECAE	shoulder	2	13:53:00	213502	8273947	23L	sirgass_2000	14:36:00	1	removed	1	0	0.3	28.7	18.7	23.4	64	5000	four_lane	3	BR_010_BR_020_BR_030	0	0.312754	0.274574	0	0.0917953	0.0146223	0.189277	0.0422421	0.0243704
540	24	2015	february	summer	2	11_02_2015	wild	small_birds	Birds	Passeriformes	Emberizidae	Volatinia_jacariNA	Tiziu	10	ESECAE	shoulder	2	14:02:00	212904	8274053	23L	sirgass_2000	14:39:00	1	removed	1	0	0.3	28.7	18.7	23.4	64	2600	two_lane	2	DF_128	0.00898693	0.357843	0.229575	0	0.0702614	0.0147059	0.184641	0.0482026	0.0367647
541	24	2015	february	summer	2	11_02_2015	wild	small_birds	Birds	Passeriformes	NA	NA	Passeriforme	25	ESECAE	lane	1	14:06:00	212843	8274153	23L	sirgass_2000	12:14:00	48	removed	1	2	0.3	28.7	18.7	23.4	64	2600	two_lane	2	DF_128	0.0209847	0.357546	0.22841	0	0.0677966	0.0145278	0.168684	0.0556901	0.039548
542	24	2015	february	summer	2	11_02_2015	wild	small_birds	Birds	Passeriformes	Emberizidae	Volatinia_jacariNA	Tiziu	10	ESECAE	shoulder	2	14:21:00	214990	8277716	23L	sirgass_2000	14:56:00	1	removed	1	0	0.3	28.7	18.7	23.4	64	2600	two_lane	2	DF_128	0	0.0800323	0.453517	0	0.0129345	0.00485044	0	0.190784	0.241714
543	24	2015	february	summer	2	11_02_2015	wild	small_birds	Birds	Apodiforme	Trochilidae	NA	Beija_flor	8	ESECAE	lane	1	14:29:00	217265	8280055	23L	sirgass_2000	12:22:00	48	removed	1	2	0.3	28.7	18.7	23.4	64	2600	two_lane	2	DF_128	0	0.0936239	0.482647	0	0.0347054	0.0104923	0	0.355125	0
544	24	2015	february	summer	2	11_02_2015	wild	small_birds	Birds	Passeriformes	Emberizidae	Volatinia_jacariNA	Tiziu	10	ESECAE	lane	1	15:02:00	226879	8279440	23L	sirgass_2000	15:37:00	1	removed	1	0	0.3	28.7	18.7	23.4	64	951	two_lane	2	BR_010_DF_345	0	0.0282486	0.450363	0	0.0419693	0.0661824	0	0.387409	0
545	24	2015	february	summer	2	11_02_2015	wild	small_reptiles	Reptile	Squamata	Amphisbaenidae	AmphisbaeNA_alba	Cobra_de_duas_cabeças	25	ESECAE	shoulder	2	15:07:00	226165	8278476	23L	sirgass_2000	15:44:00	1	removed	1	0	0.3	28.7	18.7	23.4	64	951	two_lane	2	BR_010_DF_345	0	0.0161812	0.444984	0	0.0477346	0.0550162	0	0.411812	0
546	25	2015	march	summer	2	16_03_2015	wild	small_birds	Birds	Passeriformes	Emberizidae	Volatinia_jacariNA	Tiziu	10	IBGE	lane	1	08:16:00	191331	8232684	23L	sirgass_2000	08:30:00	1	removed	1	0	0	27.1	17.6	20.78	76.75	2000	two_lane	2	BR_251	0	0.0834008	0.449393	0	0.0566802	0.0477733	0.00161943	0.348178	0
547	25	2015	march	summer	2	16_03_2015	wild	small_birds	Birds	Caprimulgiforme	Caprimulgidae	NA	Bacurau	45	FAL	lane	1	08:37:00	180598	8231471	23L	sirgass_2000	08:43:00	24	removed	1	1	0	27.1	17.6	20.78	76.75	2000	two_lane	2	BR_251	0.000807103	0.0306699	0.631961	0	0.0564972	0.14205	0.0338983	0.0484262	0
548	25	2015	march	summer	2	16_03_2015	wild	small_birds	Birds	Passeriformes	Emberizidae	Volatinia_jacariNA	Tiziu	10	PNB	lane	1	09:27:00	173280	8256253	23L	sirgass_2000	09:30:00	1	removed	1	0	0	27.1	17.6	20.78	76.75	8000	two_lane	2	DF_001	0	0.0370968	0.493548	0.112097	0.041129	0.137097	0	0.162903	0
549	25	2015	march	summer	2	16_03_2015	wild	small_birds	Birds	Apodiforme	Trochilidae	NA	Beija_flor	8	PNB	lane	1	09:50:00	169083	8260438	23L	sirgass_2000	09:42:00	1	removed	1	0	0	27.1	17.6	20.78	76.75	775	two_lane	2	DF_001	0	0.0813205	0.335749	0	0.068438	0.102254	0	0.279388	0.114332
550	25	2015	march	summer	2	16_03_2015	wild	small_birds	Birds	Passeriformes	NA	NA	Passeriforme	25	PNB	lane	1	10:30:00	181499	8272619	23L	sirgass_2000	10:23:00	1	removed	1	0	0	27.1	17.6	20.78	76.75	775	two_lane	2	DF_001	0	0.0444265	0.429725	0	0.0783522	0.0242326	0	0.409532	0
551	25	2015	march	summer	2	16_03_2015	wild	small_birds	Birds	Passeriformes	NA	NA	Passeriforme	25	PNB	lane	1	10:33:00	181642	8272510	23L	sirgass_2000	10:24:00	1	removed	1	0	0	27.1	17.6	20.78	76.75	775	two_lane	2	DF_001	0	0.0323625	0.424757	0	0.0833333	0.0234628	0	0.42233	0
552	25	2015	march	summer	2	16_03_2015	wild	small_birds	Birds	Passeriformes	Emberizidae	Volatinia_jacariNA	Tiziu	10	PNB	lane	1	10:37:00	181946	8272280	23L	sirgass_2000	10:19:00	24	removed	1	1	0	27.1	17.6	20.78	76.75	775	two_lane	2	DF_001	0	0.0137429	0.39612	0	0.108327	0.025869	0	0.442199	0
553	25	2015	march	summer	2	16_03_2015	domestic	medium_mammals	Mammals	Carnivora	Felidae	Felis_catus	Gato_Domestico	5000	ESECAE	shoulder	2	11:30:00	221512	8274345	23L	sirgass_2000	11:15:00	96	remained	0	4	0	27.1	17.6	20.78	76.75	5000	four_lane	3	BR_010_BR_020_BR_030	0	0.00894309	0.458537	0	0.0130081	0	0	0.486992	0
554	25	2015	march	summer	2	16_03_2015	wild	small_mammals	Mammals	Primates	Cebidae	Callithrix_penicillata	Sagui	400	ESECAE	lane	1	11:44:00	221691	8274433	23L	sirgass_2000	11:30:00	1	removed	1	0	0	27.1	17.6	20.78	76.75	5000	four_lane	3	BR_010_BR_020_BR_030	0	0.00647773	0.472874	0	0.00647773	0	0	0.481781	0
555	25	2015	march	summer	2	16_03_2015	wild	Large_reptiles	Reptile	Squamata	Boidae	Boa_constrictor	Jiboia	4000	ESECAE	shoulder	2	11:50:00	219012	8273803	23L	sirgass_2000	11:25:00	96	remained	0	4	0	27.1	17.6	20.78	76.75	5000	four_lane	3	BR_010_BR_020_BR_030	0	0.0403877	0.645396	0	0.0476575	0	0.0177706	0.216478	0
556	25	2015	march	summer	2	17_03_2015	wild	small_birds	Birds	Passeriformes	Emberizidae	Volatinia_jacariNA	Tiziu	10	JBB	lane	1	07:59:00	198062	8240206	23L	sirgass_2000	07:54:00	1	removed	1	0	0	23.9	17.1	20.12	82.25	7000	four_lane	3	DF_001	0	0.154032	0.471774	0	0.00806452	0.00725806	0.0758065	0.253226	0
557	25	2015	march	summer	2	17_03_2015	wild	small_birds	Birds	Cuculiforme	Cuculidae	Crotophaga_ani	Anu_preto	100	PNB	lane	1	09:53:00	169260	8266179	23L	sirgass_2000	09:46:00	1	removed	1	0	0	23.9	17.1	20.12	82.25	775	dirt_road	1	DF_001	0	0.0356853	0.278183	0	0.0210868	0.201135	0	0.178427	0.271695
558	25	2015	march	summer	2	17_03_2015	wild	small_birds	Birds	Passeriformes	Emberizidae	Volatinia_jacariNA	Tiziu	10	PNB	lane	1	10:16:00	178652	8274785	23L	sirgass_2000	10:12:00	1	removed	1	0	0	23.9	17.1	20.12	82.25	775	two_lane	2	DF_001	0	0.043654	0.405821	0	0.0404204	0.00565885	0	0.490703	0
559	25	2015	march	summer	2	17_03_2015	wild	small_reptiles	Reptile	Squamata	Amphisbaenidae	AmphisbaeNA_alba	Cobra_de_duas_cabeças	25	ESECAE	lane	1	11:53:00	212571	8274636	23L	sirgass_2000	11:44:00	1	removed	1	0	0	23.9	17.1	20.12	82.25	2600	two_lane	2	DF_128	0.0912026	0.326877	0.231638	0	0.0468119	0.00242131	0.119451	0.101695	0.0379338
560	25	2015	march	summer	2	17_03_2015	wild	small_birds	Birds	Passeriformes	Emberizidae	Volatinia_jacariNA	Tiziu	10	ESECAE	shoulder	2	12:40:00	225231	8277186	23L	sirgass_2000	12:30:00	1	removed	1	0	0	23.9	17.1	20.12	82.25	951	two_lane	2	BR_010_DF_345	0	0.013754	0.47411	0	0.0105178	0.000809061	0	0.460356	0
561	25	2015	march	summer	2	18_03_2015	wild	small_birds	Birds	Passeriformes	NA	NA	Passeriforme	25	IBGE	lane	1	08:24:00	191134	8232603	23L	sirgass_2000	09:14:00	1	removed	1	0	18.1	24.6	17.5	19.96	81	2000	two_lane	2	BR_251	0	0.0738636	0.483766	0	0.0592532	0.0446429	0	0.325487	0
562	25	2015	march	summer	2	18_03_2015	wild	small_birds	Birds	Passeriformes	Emberizidae	Volatinia_jacariNA	Tiziu	10	PNB	shoulder	2	09:27:00	171932	8257585	23L	sirgass_2000	10:34:00	1	removed	1	0	18.1	24.6	17.5	19.96	81	8000	two_lane	2	DF_001	0	0.0251012	0.48664	0.158704	0.0769231	0.238866	0	0.000809717	0
563	25	2015	march	summer	2	18_03_2015	wild	small_birds	Birds	Passeriformes	NA	NA	Passeriforme	25	PNB	lane	1	09:32:00	169658	8258378	23L	sirgass_2000	10:40:00	1	removed	1	0	18.1	24.6	17.5	19.96	81	775	two_lane	2	DF_001	0	0.0316302	0.206813	0.313058	0.107867	0.107056	0	0.16545	0.0478508
564	25	2015	march	summer	2	18_03_2015	wild	small_birds	Birds	Passeriformes	Emberizidae	Volatinia_jacariNA	Tiziu	10	ESECAE	lane	1	11:42:00	212725	8275385	23L	sirgass_2000	14:03:00	1	removed	1	0	18.1	24.6	17.5	19.96	81	2600	two_lane	2	DF_128	0.103476	0.299111	0.28941	0	0.039612	0	0.0121261	0.190784	0.0363783
565	25	2015	march	summer	2	18_03_2015	domestic	Large_mammals	Mammals	Carnivora	Canidae	Canis_familiaris	Cachorro_Domestico	10000	ESECAE	shoulder	2	11:52:00	215646	8278382	23L	sirgass_2000	11:34:00	48	removed	1	2	18.1	24.6	17.5	19.96	81	2600	two_lane	2	DF_128	0	0.0679062	0.488278	0	0.017785	0.00485044	0	0.197251	0.207761
566	26	2015	april	autumn	3	06_04_2015	wild	large_birds	Birds	Strigiforme	Tytonidae	Tyto_alba	Suindara	500	FAL	shoulder	2	08:23:00	184576	8230768	23L	sirgass_2000	08:21:00	1	removed	1	0	23.2	27.6	18.2	22.84	70.5	2000	two_lane	2	BR_251	0	0.0234249	0.79483	0	0.0969305	0.0185784	0	0.0444265	0
567	26	2015	april	autumn	3	06_04_2015	wild	small_birds	Birds	Passeriformes	NA	NA	Passeriforme	25	PNB	lane	1	09:16:00	173261	8252727	23L	sirgass_2000	09:05:00	48	removed	1	2	23.2	27.6	18.2	22.84	70.5	8000	two_lane	2	DF_001	0	0.176805	0.181671	0.145174	0.0251419	0.115166	0.138686	0.170316	0.00486618
568	26	2015	april	autumn	3	06_04_2015	wild	small_birds	Birds	Passeriformes	Emberizidae	Volatinia_jacariNA	Tiziu	10	PNB	lane	1	09:29:00	171652	8257664	23L	sirgass_2000	09:21:00	1	removed	1	0	23.2	27.6	18.2	22.84	70.5	8000	two_lane	2	DF_001	0	0.0267423	0.431929	0.196921	0.0996759	0.227715	0	0.00486224	0
569	26	2015	april	autumn	3	06_04_2015	wild	small_birds	Birds	Passeriformes	Emberizidae	Volatinia_jacariNA	Tiziu	10	PNB	lane	1	09:32:00	171494	8257692	23L	sirgass_2000	09:15:00	48	removed	1	2	23.2	27.6	18.2	22.84	70.5	8000	two_lane	2	DF_001	0	0.0274637	0.398223	0.218901	0.11147	0.22294	0	0.00726979	0
570	26	2015	april	autumn	3	06_04_2015	wild	small_birds	Birds	Passeriformes	Emberizidae	Volatinia_jacariNA	Tiziu	10	PNB	shoulder	2	09:37:00	170750	8257800	23L	sirgass_2000	09:24:00	1	removed	1	0	23.2	27.6	18.2	22.84	70.5	8000	two_lane	2	DF_001	0	0.0354839	0.289516	0.320968	0.134677	0.166129	0	0.0379032	0
571	26	2015	april	autumn	3	06_04_2015	wild	small_reptiles	Reptile	Squamata	Dipsadidae	Philodryas_patagoniensis	Cobra_cipo	150	PNB	lane	1	09:54:00	169204	8265962	23L	sirgass_2000	09:39:00	1	removed	1	0	23.2	27.6	18.2	22.84	70.5	775	dirt_road	1	DF_001	0	0.0365854	0.285366	0	0.0203252	0.182927	0	0.178862	0.279675
572	26	2015	april	autumn	3	06_04_2015	wild	small_birds	Birds	Passeriformes	Emberizidae	Volatinia_jacariNA	Tiziu	10	PNB	lane	1	10:11:00	174699	8273167	23L	sirgass_2000	09:57:00	1	removed	1	0	23.2	27.6	18.2	22.84	70.5	775	dirt_road	1	DF_001	0	0.0931929	0.363857	0	0.0591572	0.266613	0	0.034846	0.17423
573	26	2015	april	autumn	3	06_04_2015	domestic	large_birds	Ave	Galliforme	Phasianidae	Gallus_gallus_domesticus	Galinha	1500	PNB	lane	1	10:16:00	175329	8273952	23L	sirgass_2000	09:54:00	48	removed	1	2	23.2	27.6	18.2	22.84	70.5	775	dirt_road	1	DF_001	0	0.105008	0.313409	0	0.0799677	0.20517	0	0.03958	0.242326
574	26	2015	april	autumn	3	06_04_2015	wild	Large_reptiles	Reptile	Squamata	Viperidae	Crotalus_durissus	Cascavel	550	PNB	lane	1	10:20:00	176939	8275371	23L	sirgass_2000	09:58:00	24	removed	1	1	23.2	27.6	18.2	22.84	70.5	775	two_lane	2	DF_001	0	0.0759903	0.278901	0	0.00485044	0.0226354	0	0.482619	0.116411
575	26	2015	april	autumn	3	06_04_2015	wild	small_birds	Birds	Passeriformes	NA	NA	Passeriforme	25	PNB	lane	1	10:44:00	184896	8270088	23L	sirgass_2000	10:28:00	1	removed	1	0	23.2	27.6	18.2	22.84	70.5	775	two_lane	2	DF_001	0	0.00322581	0.4	0	0.0677419	0.0185484	0	0.496774	0
576	26	2015	april	autumn	3	06_04_2015	domestic	large_birds	Ave	Galliforme	Phasianidae	Gallus_gallus_domesticus	Galinha	1500	ESECAE	shoulder	2	12:00:00	222201	8274593	23L	sirgass_2000	07:53:00	96	remained	0	4	23.2	27.6	18.2	22.84	70.5	5000	four_lane	3	BR_010_BR_020_BR_030	0	0.00404531	0.485437	0	0	0	0	0.474919	0
577	26	2015	april	autumn	3	06_04_2015	wild	small_reptiles	Reptile	Squamata	Amphisbaenidae	AmphisbaeNA_alba	Cobra_de_duas_cabeças	25	ESECAE	lane	1	12:18:00	217263	8273947	23L	sirgass_2000	07:58:00	72	removed	1	3	23.2	27.6	18.2	22.84	70.5	5000	four_lane	3	BR_010_BR_020_BR_030	0	0.117219	0.539208	0	0.0517381	0	0.176233	0.0452708	0.0388036
578	26	2015	april	autumn	3	06_04_2015	domestic	Large_mammals	Mammals	Carnivora	Canidae	Canis_familiaris	Cachorro_Domestico	10000	ESECAE	lane	1	12:33:00	214050	8276744	23L	sirgass_2000	08:11:00	96	remained	0	4	23.2	27.6	18.2	22.84	70.5	2600	two_lane	2	DF_128	0	0.0898058	0.41343	0	0.0250809	0	0	0.288835	0.168285
579	26	2015	april	autumn	3	06_04_2015	wild	small_mammals	Mammals	Rodentia	Cricetidae	NA	Rato_silvestre	NA	ESECAE	lane	1	13:10:00	226348	8278718	23L	sirgass_2000	13:02:00	1	removed	1	0	23.2	27.6	18.2	22.84	70.5	951	two_lane	2	BR_010_DF_345	0	0.0154346	0.445979	0	0.0487409	0.0609261	0	0.404549	0
580	26	2015	april	autumn	3	07_04_2015	wild	small_birds	Birds	Passeriformes	NA	NA	Passeriforme	25	FAL	lane	1	08:14:00	186835	8230914	23L	sirgass_2000	08:11:00	24	removed	1	1	0	27.6	19.3	22.78	77.5	2000	two_lane	2	BR_251	0	0.0372168	0.937702	0	0.0121359	0	0	0	0
581	26	2015	april	autumn	3	07_04_2015	wild	small_birds	Birds	Passeriformes	Emberizidae	Volatinia_jacariNA	Tiziu	10	PNB	lane	1	09:08:00	173337	8256124	23L	sirgass_2000	09:02:00	1	removed	1	0	0	27.6	19.3	22.78	77.5	8000	two_lane	2	DF_001	0	0.0373984	0.469919	0.114634	0.0390244	0.134146	0	0.189431	0
582	26	2015	april	autumn	3	07_04_2015	wild	small_birds	Birds	Passeriformes	Emberizidae	Volatinia_jacariNA	Tiziu	10	PNB	lane	1	09:16:00	172888	8256931	23L	sirgass_2000	09:04:00	1	removed	1	0	0	27.6	19.3	22.78	77.5	8000	two_lane	2	DF_001	0	0.0372168	0.553398	0.110841	0.0420712	0.193366	0	0.0485437	0
583	26	2015	april	autumn	3	07_04_2015	wild	small_birds	Birds	Passeriformes	Emberizidae	Volatinia_jacariNA	Tiziu	10	ESECAE	lane	1	11:40:00	216193	8273997	23L	sirgass_2000	10:54:00	1	removed	1	0	0	27.6	19.3	22.78	77.5	5000	four_lane	3	BR_010_BR_020_BR_030	0	0.183955	0.440032	0	0.0599676	0	0.231767	0	0.0518639
584	26	2015	april	autumn	3	07_04_2015	wild	small_reptiles	Reptile	Squamata	Teiidae	Ameiva_ameiva	Lagarto	22	ESECAE	shoulder	2	11:23:00	214472	8277183	23L	sirgass_2000	08:15:00	48	removed	1	2	0	27.6	19.3	22.78	77.5	2600	two_lane	2	DF_128	0	0.0925325	0.424513	0	0.0146104	0.00487013	0	0.248377	0.203734
585	26	2015	april	autumn	3	07_04_2015	wild	small_reptiles	Reptile	Squamata	Amphisbaenidae	AmphisbaeNA_alba	Cobra_de_duas_cabeças	25	ESECAE	shoulder	2	12:32:00	216772	8279517	23L	sirgass_2000	12:23:00	1	removed	1	0	0	27.6	19.3	22.78	77.5	2600	two_lane	2	DF_128	0	0.0730519	0.500812	0	0.0430195	0.00405844	0	0.354708	0.0146104
586	26	2015	april	autumn	3	07_04_2015	domestic	Large_mammals	Mammals	Carnivora	Canidae	Canis_familiaris	Cachorro_Domestico	10000	ESECAE	lane	1	13:25:00	216148	8274035	23L	sirgass_2000	08:01:00	72	removed	1	3	0	27.6	19.3	22.78	77.5	5000	four_lane	3	BR_010_BR_020_BR_030	0	0.189976	0.43654	0	0.0598222	0	0.228779	0	0.0525465
587	26	2015	april	autumn	3	08_04_2015	wild	small_birds	Birds	Passeriformes	Emberizidae	Volatinia_jacariNA	Tiziu	10	PNB	lane	1	10:22:00	188708	8267283	23L	sirgass_2000	10:33:00	1	removed	1	0	18.8	25.6	19.3	21.26	87.5	775	two_lane	2	DF_001	0	0.0572581	0.731452	0	0.0354839	0.0580645	0.00403226	0.0798387	0.0209677
588	26	2015	april	autumn	3	08_04_2015	wild	small_birds	Birds	Passeriformes	Mimidae	Mimus_saturninus	Sabia_do_campo	73	ESECAE	lane	1	11:09:00	223917	8275129	23L	sirgass_2000	11:16:00	1	removed	1	0	18.8	25.6	19.3	21.26	87.5	5000	four_lane	3	BR_010_BR_020_BR_030	0	0.0217391	0.425121	0	0.00644122	0.000805153	0	0.495974	0
589	26	2015	april	autumn	3	08_04_2015	domestic	Large_mammals	Mammals	Carnivora	Canidae	Canis_familiaris	Cachorro_Domestico	10000	ESECAE	lane	1	11:28:00	215615	8274042	23L	sirgass_2000	08:04:00	48	removed	1	2	18.8	25.6	19.3	21.26	87.5	5000	four_lane	3	BR_010_BR_020_BR_030	0	0.234146	0.342276	0	0.1	0	0.225203	0.0130081	0.0528455
590	26	2015	april	autumn	3	08_04_2015	wild	small_mammals	Mammals	Didelphimorphia	Didelphidae	Didelphis_albiventris	Gamba_ou_Sarue_	900	ESECAE	shoulder	2	12:27:00	217866	8280673	23L	sirgass_2000	11:51:00	1	removed	1	0	18.8	25.6	19.3	21.26	87.5	2600	two_lane	2	DF_128	0	0.11417	0.451822	0	0.0299595	0.0356275	0	0.3417	0

## Sheet: Persistence - Buffer_3km
ID	survey	year	month	season_name	season_cod	data	wild_domestic	functional_group	class	order	family	species	common_name	body_mass	site	position	posic	hour_of_first_record	x	y	utm_zone	datum	hour_of_last_record	removal_time_hours	status_name	status	n_days	rainy	max_temperature	min_temperature	mean_temperature	humidity	traffic	road_type	road_type_cod	road	water	others	savannah	reforestation	forest	anthropic_vegetation	urban	agriculture	grasslands_pasture
1	1	2013	march	summer	2	11_03_2013	wild	small_reptiles	Reptile	Squamata	Amphisbaenidae	Amphisbaena_alba	Cobra_de_duas_cabeças	25	ESECAE	shoulder	2	08:10:00	217565	8273890	23L	sirgass_2000	08:12:00	1	removed	1	0	0.2	28.8	19.5	23.62	75.75	5000	four_lane	3	BR_010_BR_020_BR_030	0	0.085704	0.552035	0	0.0446525	0	0.197695	0.0799424	0.0183651
2	1	2013	march	summer	2	11_03_2013	wild	small_reptiles	Reptile	Squamata	Amphisbaenidae	Amphisbaena_alba	Cobra_de_duas_cabeças	25	ESECAE	shoulder	2	08:22:00	220298	8273950	23L	sirgass_2000	08:35:00	24	removed	1	1	0.2	28.8	19.5	23.62	75.75	5000	four_lane	3	BR_010_BR_020_BR_030	0	0.0227191	0.617382	0	0.0263253	0.00144248	0.00829427	0.3022	0
3	1	2013	march	summer	2	11_03_2013	wild	small_birds	Birds	Passeriformes	NA	NA	Passeriforme	25	ESECAE	shoulder	2	09:08:00	217702	8280504	23L	sirgass_2000	09:29:00	48	removed	1	2	0.2	28.8	19.5	23.62	75.75	2600	two_lane	2	DF_128	0	0.108555	0.473041	0	0.0363048	0.0219267	0	0.338965	0.0046729
4	1	2013	march	summer	2	11_03_2013	wild	small_birds	Birds	Passeriformes	Emberizidae	Volatinia_jacarina	Tiziu	10	ESECAE	shoulder	2	09:31:00	228461	8282509	23L	sirgass_2000	09:50:00	1	removed	1	0	0.2	28.8	19.5	23.62	75.75	951	two_lane	2	BR_010_DF_345	0	0.0298165	0.201453	0	0.0179664	0.000764526	0	0.701453	0
5	1	2013	march	summer	2	11_03_2013	wild	Large_mammals	Mammals	Carnivora	Canidae	Cerdocyon_thous	Cachorro_do_mato	5700	ESECAE	lane	1	09:42:00	224383	8276059	23L	sirgass_2000	10:05:00	1	removed	1	0	0.2	28.8	19.5	23.62	75.75	951	two_lane	2	BR_010_DF_345	0	0.0150538	0.492473	0.00430108	0.00573477	0.000716846	0	0.443728	0
6	1	2013	march	summer	2	11_03_2013	wild	small_birds	Birds	Passeriformes	Emberizidae	Volatinia_jacarina	Tiziu	10	ESECAE	shoulder	2	10:15:00	191092	8265516	23L	sirgass_2000	10:42:00	1	removed	1	0	0.2	28.8	19.5	23.62	75.75	775	two_lane	2	DF_001	0.000718649	0.0758175	0.515271	0	0.0463529	0.225296	0.0582106	0.0607258	0.00574919
7	1	2013	march	summer	2	12_03_2013	wild	large_birds	Birds	Charadriiformes	Charadriidae	Vanellus_chilensis	Quero_quero	300	ESECAE	shoulder	2	08:17:00	218933	8273755	23L	sirgass_2000	07:53:00	72	removed	1	3	1.1	30.4	19	24.56	67.5	5000	four_lane	3	BR_010_BR_020_BR_030	0	0.0601719	0.607092	0	0.0304441	0	0.0873926	0.19341	0.000358166
8	1	2013	march	summer	2	12_03_2013	wild	small_birds	Birds	Passeriformes	Emberizidae	Volatinia_jacarina	Tiziu	10	ESECAE	shoulder	2	08:33:00	223553	8275016	23L	sirgass_2000	08:25:00	72	removed	1	3	1.1	30.4	19	24.56	67.5	5000	four_lane	3	BR_010_BR_020_BR_030	0	0.0133381	0.439077	0.00324441	0.00540735	0.00036049	0	0.503244	0
9	1	2013	march	summer	2	12_03_2013	wild	small_birds	Birds	Passeriformes	Emberizidae	Volatinia_jacarina	Tiziu	10	ESECAE	lane	1	09:55:00	228045	8281110	23L	sirgass_2000	09:55:00	1	removed	1	0	1.1	30.4	19	24.56	67.5	951	two_lane	2	BR_010_DF_345	0	0.0263253	0.291021	0	0.0144248	0.0295709	0	0.606563	0
10	1	2013	march	summer	2	12_03_2013	wild	small_birds	Birds	Passeriformes	Emberizidae	Volatinia_jacarina	Tiziu	10	PNB	lane	1	10:33:00	192490	8264315	23L	sirgass_2000	11:04:00	1	removed	1	0	1.1	30.4	19	24.56	67.5	775	two_lane	2	DF_001	0.000718907	0.149533	0.356937	0	0.0413372	0.15133	0.185478	0.0600288	0.0237239
11	1	2013	march	summer	2	12_03_2013	wild	small_birds	Birds	Passeriformes	NA	NA	Passeriforme	25	PNB	lane	1	10:55:00	184506	8270385	23L	sirgass_2000	11:00:00	72	removed	1	3	1.1	30.4	19	24.56	67.5	775	two_lane	2	DF_001	0	0.0068076	0.41598	0	0.0938732	0.080258	0	0.386958	0.00716589
12	1	2013	march	summer	2	12_03_2013	wild	small_reptiles	Reptile	Squamata	Dipsadidae	Philodryas_sp	Cobra_cipo	150	PNB	lane	1	10:57:00	184515	8270378	23L	sirgass_2000	11:20:00	1	removed	1	0	1.1	30.4	19	24.56	67.5	775	two_lane	2	DF_001	0	0.0068076	0.414905	0	0.0938732	0.0809746	0	0.387316	0.00716589
13	1	2013	march	summer	2	12_03_2013	wild	small_birds	Birds	Passeriformes	Emberizidae	Volatinia_jacarina	Tiziu	10	PNB	lane	1	11:23:00	183110	8271409	23L	sirgass_2000	11:00:00	24	removed	1	1	1.1	30.4	19	24.56	67.5	775	two_lane	2	DF_001	0	0.00502513	0.440775	0	0.100861	0.0865039	0	0.35822	0
14	1	2013	march	summer	2	12_03_2013	wild	small_birds	Birds	Passeriformes	Emberizidae	Volatinia_jacarina	Tiziu	10	PNB	lane	1	11:32:00	179366	8274255	23L	sirgass_2000	11:57:00	1	removed	1	0	1.1	30.4	19	24.56	67.5	775	two_lane	2	DF_001	0	0.070377	0.451706	0	0.0628366	0.0567325	0	0.348294	0.000718133
15	1	2013	march	summer	2	12_03_2013	domestic	medium_mammals	Mammals	Carnivora	Felidae	Felis_catus	Gato_Domestico	5000	PNB	lane	1	12:04:00	169619	8258405	23L	sirgass_2000	12:37:00	1	removed	1	0	1.1	30.4	19	24.56	67.5	775	two_lane	2	DF_001	0	0.0259086	0.214466	0.287873	0.0766463	0.146456	0	0.18136	0.0543361
16	1	2013	march	summer	2	12_03_2013	wild	small_birds	Birds	Passeriformes	Emberizidae	Volatinia_jacarina	Tiziu	10	PNB	shoulder	2	12:08:00	170314	8257923	23L	sirgass_2000	11:57:00	24	removed	1	1	1.1	30.4	19	24.56	67.5	8000	two_lane	2	BR_080	0	0.0232975	0.24552	0.318638	0.083871	0.191756	0	0.0949821	0.0293907
17	1	2013	march	summer	2	12_03_2013	wild	small_mammals	Mammals	Chiroptera	Mormoopidae	Pteronotus_sp	Morcego	20	PNB	shoulder	2	12:15:00	173081	8256646	23L	sirgass_2000	12:53:00	1	removed	1	0	1.1	30.4	19	24.56	67.5	8000	two_lane	2	DF_001	0	0.0258065	0.417921	0.175269	0.0691756	0.164516	0	0.136918	0
18	1	2013	march	summer	2	12_03_2013	wild	small_birds	Birds	Passeriformes	Emberizidae	Volatinia_jacarina	Tiziu	10	PNB	shoulder	2	12:18:00	173132	8256558	23L	sirgass_2000	10:35:00	48	removed	1	2	1.1	30.4	19	24.56	67.5	8000	two_lane	2	DF_001	0	0.0275788	0.409026	0.174069	0.0687679	0.161533	0	0.148639	0
19	1	2013	march	summer	2	12_03_2013	wild	small_birds	Birds	Cuculiforme	Cuculidae	Crotophaga_ani	Anu_preto	100	PNB	shoulder	2	12:25:00	173706	8254708	23L	sirgass_2000	13:08:00	1	removed	1	0	1.1	30.4	19	24.56	67.5	8000	two_lane	2	DF_001	0	0.0937163	0.250628	0.163734	0.0456014	0.10772	0	0.32316	0
20	1	2013	march	summer	2	13_03_2013	wild	small_reptiles	Reptile	Squamata	Amphisbaenidae	Amphisbaena_alba	Cobra_de_duas_cabeças	25	ESECAE	lane	1	08:08:00	215811	8274026	23L	sirgass_2000	07:53:00	1	removed	1	0	0	30.5	19.3	23.2	80.75	5000	four_lane	3	BR_010_BR_020_BR_030	0	0.13498	0.457573	0	0.0708915	0.0028643	0.252775	0.0318654	0.0232725
21	1	2013	march	summer	2	13_03_2013	wild	small_reptiles	Reptile	Squamata	Dipsadidae	Sibynomorphus_mikanii	Jararaquinha_dormideira	150	ESECAE	shoulder	2	08:42:00	223036	8274819	23L	sirgass_2000	08:38:00	48	removed	1	2	0	30.5	19.3	23.2	80.75	5000	four_lane	3	BR_010_BR_020_BR_030	0	0.0151461	0.465921	0.00504868	0.00504868	0.00144248	0	0.475298	0
22	1	2013	march	summer	2	13_03_2013	wild	small_birds	Birds	Passeriformes	Emberizidae	Volatinia_jacarina	Tiziu	10	ESECAE	shoulder	2	09:10:00	221894	8274495	23L	sirgass_2000	08:50:00	48	removed	1	2	0	30.5	19.3	23.2	80.75	5000	four_lane	3	BR_010_BR_020_BR_030	0	0.0179727	0.534508	0.00395399	0.0172538	0.00179727	0	0.393961	0
23	1	2013	march	summer	2	13_03_2013	wild	small_reptiles	Reptile	Squamata	Dipsadidae	Oxyrhopus_guibei	Coral_falsa	80	ESECAE	shoulder	2	08:25:00	218936	8273808	23L	sirgass_2000	08:50:00	1	removed	1	0	0	30.5	19.3	23.2	80.75	5000	four_lane	3	BR_010_BR_020_BR_030	0	0.0597983	0.615274	0	0.0306196	0	0.0853746	0.18732	0.000360231
24	1	2013	march	summer	2	13_03_2013	wild	small_reptiles	Reptile	Squamata	Amphisbaenidae	Amphisbaena_alba	Cobra_de_duas_cabeças	25	ESECAE	shoulder	2	09:28:00	217954	8273888	23L	sirgass_2000	08:54:00	1	removed	1	0	0	30.5	19.3	23.2	80.75	5000	four_lane	3	BR_010_BR_020_BR_030	0	0.0764239	0.571017	0	0.0418169	0	0.168349	0.103461	0.0173035
25	1	2013	march	summer	2	13_03_2013	wild	small_birds	Birds	Passeriformes	Emberizidae	Volatinia_jacarina	Tiziu	10	ESECAE	lane	1	10:35:00	224254	8275879	23L	sirgass_2000	10:04:00	1	removed	1	0	0	30.5	19.3	23.2	80.75	951	two_lane	2	BR_010_DF_345	0	0.0147695	0.483069	0.00432277	0.00540346	0.000720461	0	0.45389	0
26	1	2013	march	summer	2	13_03_2013	wild	small_birds	Birds	Passeriformes	Emberizidae	Volatinia_jacarina	Tiziu	10	PNB	lane	1	12:03:00	177439	8275461	23L	sirgass_2000	10:04:00	24	removed	1	1	0	30.5	19.3	23.2	80.75	775	two_lane	2	DF_001	0	0.0469871	0.291966	0	0.0541607	0.0839311	0	0.419656	0.0918221
27	1	2013	march	summer	2	13_03_2013	domestic	Large_mammals	Mammals	Carnivora	Canidae	Canis_familiaris	Cachorro_Domestico	10000	PNB	shoulder	2	12:43:00	170180	8257965	23L	sirgass_2000	12:23:00	48	removed	1	2	0	30.5	19.3	23.2	80.75	8000	two_lane	2	BR_080	0	0.0240316	0.236729	0.322095	0.0832138	0.181492	0	0.106528	0.0333572
28	1	2013	march	summer	2	13_03_2013	wild	small_reptiles	Reptile	Squamata	Amphisbaenidae	Amphisbaena_alba	Cobra_de_duas_cabeças	25	FAL	shoulder	2	14:02:00	182117	8231571	23L	sirgass_2000	13:48:00	48	removed	1	2	0	30.5	19.3	23.2	80.75	2000	two_lane	2	BR_251	0.00071736	0.0229555	0.665352	0	0.120158	0.0624103	0.0290531	0.0563128	0
29	1	2013	march	summer	2	13_03_2013	wild	medium_mammals	Mammals	Carnivora	Mustelidae	Galictis_cuja	Furao	1600	FAL	shoulder	2	14:08:00	182925	8231334	23L	sirgass_2000	11:56:00	24	removed	1	1	0	30.5	19.3	23.2	80.75	2000	two_lane	2	BR_251	0.000719683	0.0183519	0.725441	0	0.119108	0.0359842	0.0111551	0.0564951	0
30	1	2013	march	summer	2	13_03_2013	domestic	large_birds	Ave	Galliforme	Phasianidae	Gallus_gallus_domesticus	Galinha	1500	FAL	shoulder	2	14:14:00	183872	8231002	23L	sirgass_2000	13:36:00	48	removed	1	2	0	30.5	19.3	23.2	80.75	2000	two_lane	2	BR_251	0.000718391	0.0226293	0.744612	0	0.109555	0.029454	0.0111351	0.0563937	0
31	2	2013	april	autumn	3	15_04_2013	wild	small_mammals	Mammals	Didelphimorphia	Didelphidae	Didelphis_albiventris	Gamba_ou_Sarue_	900	JBB	shoulder	2	08:23:00	198049	8240766	23L	sirgass_2000	08:09:00	1	removed	1	0	1	27	18.2	21.74	83.25	7000	four_lane	3	DF_001	0	0.095546	0.45546	0	0.0908764	0.0513649	0.127874	0.15625	0
32	2	2013	april	autumn	3	15_04_2013	wild	large_birds	Birds	Falconiforme	Falconidae	NA	Gaviao_	300	PNB	lane	1	09:56:00	171987	8257566	23L	sirgass_2000	09:52:00	1	removed	1	0	1	27	18.2	21.74	83.25	8000	two_lane	2	DF_001	0	0.0258807	0.40151	0.213156	0.0934579	0.226096	0	0.0291157	0
33	2	2013	april	autumn	3	15_04_2013	wild	small_reptiles	Reptile	Squamata	Dipsadidae	Oxyrhopus_sp	Coral_falsa	80	PNB	shoulder	2	10:32:00	177526	8275459	23L	sirgass_2000	10:03:00	24	removed	1	1	1	27	18.2	21.74	83.25	775	two_lane	2	DF_001	0	0.0473628	0.290994	0	0.0520273	0.0839612	0	0.428059	0.0864729
34	2	2013	april	autumn	3	15_04_2013	domestic	Large_mammals	Mammals	Carnivora	Canidae	Canis_familiaris	Cachorro_Domestico	10000	PNB	lane	1	10:36:00	179826	8273893	23L	sirgass_2000	00:00:00	96	remained	0	4	1	27	18.2	21.74	83.25	775	two_lane	2	DF_001	0	0.0574919	0.487963	0	0.0571326	0.0646784	0	0.323751	0
35	2	2013	april	autumn	3	15_04_2013	wild	small_birds	Birds	Columbiforme	Columbidae	Columbina_talpacoti	Rolinha	47	PNB	shoulder	2	11:09:00	192825	8264015	23L	sirgass_2000	10:56:00	1	removed	1	0	1	27	18.2	21.74	83.25	775	two_lane	2	DF_001	0.000359066	0.179533	0.332136	0	0.0438061	0.149372	0.182047	0.0556553	0.0236984
36	2	2013	april	autumn	3	15_04_2013	wild	small_reptiles	Reptile	Squamata	NA	NA	Lagarto	22	ESECAE	lane	1	11:35:00	218491	8273811	23L	sirgass_2000	11:28:00	1	removed	1	0	1	27	18.2	21.74	83.25	5000	four_lane	3	BR_010_BR_020_BR_030	0	0.0654441	0.589716	0	0.0355987	0	0.124416	0.150665	0.0125854
37	2	2013	april	autumn	3	15_04_2013	wild	small_birds	Birds	Cuculiforme	Cuculidae	Guira_guira	Anu_branco	100	ESECAE	lane	1	11:48:00	224133	8275265	23L	sirgass_2000	11:44:00	1	removed	1	0	1	27	18.2	21.74	83.25	5000	four_lane	3	BR_010_BR_020_BR_030	0	0.0175564	0.413472	0.00824077	0.00537442	0.000716589	0	0.516302	0
38	2	2013	april	autumn	3	15_04_2013	wild	small_reptiles	Reptile	Squamata	Amphisbaenidae	AmphisbaeNA_alba	Cobra_de_duas_cabeças	25	ESECAE	shoulder	2	12:00:00	218431	8273850	23L	sirgass_2000	00:00:00	48	removed	1	2	1	27	18.2	21.74	83.25	5000	four_lane	3	BR_010_BR_020_BR_030	0	0.0659498	0.591398	0	0.0362007	0	0.126523	0.143728	0.0146953
39	2	2013	april	autumn	3	15_04_2013	wild	small_birds	Birds	Passeriformes	Emberizidae	Volatinia_jacariNA	Tiziu	10	ESECAE	lane	1	12:11:00	212564	8275086	23L	sirgass_2000	12:00:00	24	removed	1	1	1	27	18.2	21.74	83.25	2600	two_lane	2	DF_128	0.0582524	0.311399	0.1895	0	0.0848616	0.00647249	0.0909745	0.140956	0.0895361
40	2	2013	april	autumn	3	15_04_2013	wild	small_birds	Birds	Passeriformes	Emberizidae	Volatinia_jacariNA	Tiziu	10	ESECAE	lane	1	12:39:00	226814	8282571	23L	sirgass_2000	12:46:00	1	removed	1	0	1	27	18.2	21.74	83.25	33	dirt_road	1	DF_205	0	0.0257395	0.361506	0	0.0195928	0.000384172	0	0.543988	0
41	2	2013	april	autumn	3	16_04_2013	wild	small_birds	Birds	Passeriformes	Emberizidae	Volatinia_jacariNA	Tiziu	10	FAL	lane	1	08:32:00	187868	8231321	23L	sirgass_2000	08:21:00	1	removed	1	0	0	26.5	19	21.38	84	2000	two_lane	2	BR_251	0	0.0446204	0.906801	0	0.0140338	0.00683699	0	0.0190716	0
42	2	2013	april	autumn	3	16_04_2013	wild	Large_reptiles	Reptile	Squamata	Boidae	Epicrates_cenchria	Jiboia_arco_iris	3000	FAL	shoulder	2	08:38:00	184340	8230850	23L	sirgass_2000	08:40:00	24	removed	1	1	0	26.5	19	21.38	84	2000	two_lane	2	BR_251	0.000716076	0.0261368	0.757966	0	0.106337	0.0236305	0.00787683	0.0529896	0
43	2	2013	april	autumn	3	16_04_2013	wild	Large_reptiles	Reptile	Squamata	Viperidae	Bothrops_sp.	Jararaca	250	FAL	lane	1	08:48:00	181954	8231600	23L	sirgass_2000	08:36:00	1	removed	1	0	0	26.5	19	21.38	84	2000	two_lane	2	BR_251	0.000720981	0.0237924	0.651406	0	0.118601	0.0706561	0.0331651	0.056597	0
44	2	2013	april	autumn	3	16_04_2013	wild	small_reptiles	Reptile	Squamata	Dipsadidae	Oxyrhopus_guibei	Coral_falsa	80	PNB	shoulder	2	09:56:00	170597	8257843	23L	sirgass_2000	09:54:00	24	removed	1	1	0	26.5	19	21.38	84	8000	two_lane	2	DF_001	0	0.0219424	0.268345	0.311151	0.0852518	0.210072	0	0.0730216	0.0190647
45	2	2013	april	autumn	3	16_04_2013	wild	small_birds	Birds	Passeriformes	NA	NA	Passeriforme	25	ESECAE	lane	1	11:28:00	216883	8273942	23L	sirgass_2000	11:17:00	1	removed	1	0	0	26.5	19	21.38	84	5000	four_lane	3	BR_010_BR_020_BR_030	0	0.13651	0.480473	0	0.061985	0	0.226084	0.0501612	0.0232891
46	2	2013	april	autumn	3	16_04_2013	wild	small_reptiles	Reptile	Squamata	Amphisbaenidae	AmphisbaeNA_alba	Cobra_de_duas_cabeças	25	ESECAE	shoulder	2	11:30:00	218775	8273769	23L	sirgass_2000	00:00:00	72	removed	1	3	0	26.5	19	21.38	84	5000	four_lane	3	BR_010_BR_020_BR_030	0	0.0632411	0.598994	0	0.0323392	0	0.102048	0.178225	0.00359324
47	2	2013	april	autumn	3	16_04_2013	wild	small_reptiles	Reptile	Squamata	Amphisbaenidae	AmphisbaeNA_alba	Cobra_de_duas_cabeças	25	ESECAE	shoulder	2	11:35:00	219828	8273799	23L	sirgass_2000	11:24:00	1	removed	1	0	0	26.5	19	21.38	84	5000	four_lane	3	BR_010_BR_020_BR_030	0	0.0281081	0.626306	0	0.0266667	0.00036036	0.0248649	0.272432	0
48	2	2013	april	autumn	3	16_04_2013	wild	small_birds	Birds	Passeriformes	Mimidae	Mimus_saturninus	Sabia_do_campo	73	ESECAE	shoulder	2	11:46:00	223942	8275136	23L	sirgass_2000	11:33:00	1	removed	1	0	0	26.5	19	21.38	84	5000	four_lane	3	BR_010_BR_020_BR_030	0	0.0168883	0.416457	0.00431189	0.00538987	0.000718649	0	0.518505	0
49	2	2013	april	autumn	3	16_04_2013	wild	small_reptiles	Reptile	Squamata	Amphisbaenidae	AmphisbaeNA_alba	Cobra_de_duas_cabeças	25	ESECAE	shoulder	2	11:57:00	218400	8273853	23L	sirgass_2000	09:50:00	48	removed	1	2	0	26.5	19	21.38	84	5000	four_lane	3	BR_010_BR_020_BR_030	0	0.0666907	0.590123	0	0.0364095	0	0.128335	0.141312	0.0155011
50	2	2013	april	autumn	3	16_04_2013	wild	Large_reptiles	Reptile	Squamata	Viperidae	Crotalus_durissus	Cascavel	550	ESECAE	shoulder	2	12:04:00	217064	8273957	23L	sirgass_2000	00:00:00	72	removed	1	3	0	26.5	19	21.38	84	5000	four_lane	3	BR_010_BR_020_BR_030	0	0.12931	0.502874	0	0.0502874	0	0.218032	0.0549569	0.0233477
51	2	2013	april	autumn	3	16_04_2013	wild	large_birds	Birds	Strigiforme	Strigidae	Megascops_choliba	Corujinha_do_Mato	160	ESECAE	shoulder	2	12:05:00	212576	8275129	23L	sirgass_2000	00:00:00	72	removed	1	3	0	26.5	19	21.38	84	2600	two_lane	2	DF_128	0.0582944	0.308024	0.192875	0	0.0834833	0.00647715	0.0860022	0.141058	0.095358
52	2	2013	april	autumn	3	16_04_2013	wild	small_birds	Birds	Passeriformes	Emberizidae	Volatinia_jacariNA	Tiziu	10	ESECAE	shoulder	2	12:19:00	212685	8275333	23L	sirgass_2000	12:01:00	1	removed	1	0	0	26.5	19	21.38	84	2600	two_lane	2	DF_128	0.0582315	0.303379	0.208124	0	0.0754853	0.00647017	0.0722502	0.140906	0.107836
53	2	2013	april	autumn	3	16_04_2013	wild	small_reptiles	Reptile	Squamata	Dipsadidae	Erythrolamprus_aesculapii	Coral_falsa	80	ESECAE	lane	1	12:50:00	228453	8282584	23L	sirgass_2000	00:00:00	72	removed	1	3	0	26.5	19	21.38	84	951	two_lane	2	BR_010_DF_345	0	0.029661	0.199538	0	0.0181048	0.000770416	0	0.702234	0
54	2	2013	april	autumn	3	17_04_2013	wild	small_reptiles	Reptile	Squamata	Dipsadidae	Philodryas_sp	Cobra_cipo	150	JBB	lane	1	07:56:00	198094	8240377	23L	sirgass_2000	08:01:00	1	removed	1	0	7.3	26.5	16.2	20.32	74.25	7000	four_lane	3	DF_001	0	0.0860523	0.503406	0	0.0652564	0.0448189	0.117246	0.161348	0
55	2	2013	april	autumn	3	17_04_2013	wild	small_birds	Birds	Passeriformes	Emberizidae	Volatinia_jacariNA	Tiziu	10	JBB	lane	1	07:59:00	198049	8240766	23L	sirgass_2000	08:06:00	1	removed	1	0	7.3	26.5	16.2	20.32	74.25	7000	four_lane	3	DF_001	0	0.095546	0.45546	0	0.0908764	0.0513649	0.127874	0.15625	0
56	2	2013	april	autumn	3	17_04_2013	wild	small_birds	Birds	Passeriformes	Emberizidae	Zonotrichia_capensis	Tico_tico	16	JBB	lane	1	08:30:00	185386	8230620	23L	sirgass_2000	08:38:00	1	removed	1	0	7.3	26.5	16.2	20.32	74.25	2000	two_lane	2	BR_251	0.00036075	0.0209235	0.836941	0	0.0865801	0.0104618	0	0.027417	0
57	2	2013	april	autumn	3	17_04_2013	wild	small_reptiles	Reptile	Squamata	Amphisbaenidae	AmphisbaeNA_alba	Cobra_de_duas_cabeças	25	PNB	lane	1	09:25:00	173413	8255935	23L	sirgass_2000	09:47:00	1	removed	1	0	7.3	26.5	16.2	20.32	74.25	8000	two_lane	2	DF_001	0	0.0373161	0.360962	0.167922	0.0595623	0.132759	0	0.229996	0
58	2	2013	april	autumn	3	17_04_2013	wild	small_birds	Birds	Cuculiforme	Cuculidae	Crotophaga_ani	Anu_preto	100	PNB	lane	1	09:35:00	169714	8258333	23L	sirgass_2000	09:58:00	1	removed	1	0	7.3	26.5	16.2	20.32	74.25	775	two_lane	2	DF_001	0	0.0258157	0.216207	0.294729	0.0774471	0.152743	0	0.168519	0.0516314
59	2	2013	april	autumn	3	17_04_2013	wild	small_mammals	Mammals	Rodentia	Cricetidae	Cerradomys_scotti	Rato_silvestre	90	PNB	lane	1	10:40:00	192578	8264226	23L	sirgass_2000	11:07:00	1	removed	1	0	7.3	26.5	16.2	20.32	74.25	775	two_lane	2	DF_001	0.00036075	0.156566	0.348485	0	0.0425685	0.149711	0.187229	0.0591631	0.0238095
60	2	2013	april	autumn	3	17_04_2013	wild	small_reptiles	Reptile	Squamata	Amphisbaenidae	AmphisbaeNA_alba	Cobra_de_duas_cabeças	25	ESECAE	shoulder	2	10:47:00	217606	8273917	23L	sirgass_2000	12:17:00	1	removed	1	0	7.3	26.5	16.2	20.32	74.25	5000	four_lane	3	BR_010_BR_020_BR_030	0	0.0831243	0.557865	0	0.0444285	0.000358295	0.193479	0.0809746	0.0179147
61	3	2013	may	autumn	3	06_05_2013	wild	small_reptiles	Reptile	Squamata	Amphisbaenidae	AmphisbaeNA_alba	Cobra_de_duas_cabeças	25	ESECAE	shoulder	2	08:03:00	218462	8273814	23L	sirgass_2000	00:00:00	72	removed	1	3	0	28.4	14.5	21.84	53	5000	four_lane	3	BR_010_BR_020_BR_030	0	0.0654912	0.586902	0	0.0359842	0	0.127024	0.149334	0.013674
62	3	2013	may	autumn	3	06_05_2013	wild	small_reptiles	Reptile	Squamata	Dipsadidae	Oxyrhopus_sp	Coral_falsa	80	PNB	shoulder	2	10:35:00	168837	8263186	23L	sirgass_2000	00:00:00	1	removed	1	0	0	28.4	14.5	21.84	53	775	two_lane	2	DF_001	0	0.0973324	0.382841	0	0.0428983	0.0937275	0	0.283706	0.0821918
63	3	2013	may	autumn	3	07_05_2013	wild	small_birds	Birds	Passeriformes	NA	NA	Passeriforme	25	ESECAE	lane	1	09:05:00	224149	8275291	23L	sirgass_2000	00:00:00	24	removed	1	1	0	28.4	17.5	22.1	60.25	5000	four_lane	3	BR_010_BR_020_BR_030	0	0.0169492	0.416516	0.00829427	0.0054093	0.000721241	0	0.513884	0
64	3	2013	may	autumn	3	07_05_2013	wild	small_mammals	Mammals	Chiroptera	Phyllostomidae	Glossophaga_sp	Morcego	20	ESECAE	shoulder	2	09:40:00	218247	8281063	23L	sirgass_2000	00:00:00	1	removed	1	0	0	28.4	17.5	22.1	60.25	2600	two_lane	2	DF_128	0	0.109594	0.450234	0	0.054258	0.0201222	0	0.341718	0.00754581
65	3	2013	may	autumn	3	07_05_2013	wild	Large_reptiles	Reptile	Squamata	Boidae	Epicrates_cenchria	Jiboia_arco_iris	3000	PNB	lane	1	10:50:00	192354	8264430	23L	sirgass_2000	00:00:00	24	removed	1	1	0	28.4	17.5	22.1	60.25	775	two_lane	2	DF_001	0.000719942	0.142189	0.363571	0	0.0442765	0.155148	0.179266	0.0611951	0.0237581
66	3	2013	may	autumn	3	07_05_2013	wild	Large_reptiles	Reptile	Squamata	Boidae	Epicrates_cenchria	Jiboia_arco_iris	3000	PNB	shoulder	2	10:57:00	189849	8266452	23L	sirgass_2000	00:00:00	72	removed	1	3	0	28.4	17.5	22.1	60.25	775	two_lane	2	DF_001	0.000716846	0.0630824	0.658423	0	0.0483871	0.162366	0.0207885	0.0318996	0.00573477
67	3	2013	may	autumn	3	07_05_2013	wild	Large_reptiles	Reptile	Squamata	Viperidae	Crotalus_durissus	Cascavel	550	PNB	lane	1	12:19:00	170803	8257775	23L	sirgass_2000	00:00:00	1	removed	1	0	0	28.4	17.5	22.1	60.25	8000	two_lane	2	DF_001	0	0.0225645	0.285817	0.299427	0.0881089	0.21884	0	0.0601719	0.0139685
68	3	2013	may	autumn	3	07_05_2013	wild	small_birds	Birds	NA	NA	NA	ave_silvestre	NA	JBB	lane	1	13:33:00	196964	8237294	23L	sirgass_2000	00:00:00	48	removed	1	2	0	28.4	17.5	22.1	60.25	7000	four_lane	3	DF_001	0	0.104392	0.599352	0	0.0532757	0.0147588	0.0637149	0.143269	0
69	3	2013	may	autumn	3	08_05_2013	wild	small_reptiles	Reptile	Squamata	Dipsadidae	Philodryas_sp	Cobra_cipo	150	FAL	lane	1	11:57:00	180357	8231410	23L	sirgass_2000	00:00:00	48	removed	1	2	0	26.6	15	19.92	66.5	2000	two_lane	2	BR_251	0.000719424	0.0284173	0.510072	0	0.0938849	0.189928	0.076259	0.0503597	0
70	3	2013	may	autumn	3	08_05_2013	wild	small_birds	Birds	Passeriformes	Melanopareiidae	Melanopareia_torquata	tapaculo_de_colarinho	16	FAL	shoulder	2	12:06:00	183860	8231004	23L	sirgass_2000	00:00:00	1	removed	1	0	0	26.6	15	19.92	66.5	2000	two_lane	2	BR_251	0.000720721	0.0223423	0.744144	0	0.10991	0.0295495	0.0111712	0.0565766	0
71	3	2013	may	autumn	3	08_05_2013	wild	small_birds	Birds	Passeriformes	Emberizidae	Volatinia_jacariNA	Tiziu	10	FAL	lane	1	12:31:00	197062	8237487	23L	sirgass_2000	00:00:00	1	removed	1	0	0	26.6	15	19.92	66.5	7000	four_lane	3	DF_001	0	0.111471	0.607695	0	0.0553758	0.0165408	0.049982	0.137001	0
72	4	2013	june	autumn	3	17_06_2013	domestic	Large_mammals	Mammals	Carnivora	Canidae	Canis_familiaris	Cachorro_Domestico	10000	ESECAE	shoulder	2	08:12:00	223800	8275149	23L	sirgass_2000	08:14:00	1	removed	1	0	0	27.4	14.7	21.18	61	5000	four_lane	3	BR_010_BR_020_BR_030	0	0.0147801	0.431507	0.00180245	0.00540735	0.000720981	0	0.508291	0
73	4	2013	june	autumn	3	17_06_2013	domestic	medium_mammals	Mammals	Carnivora	Felidae	Felis_catus	Gato_Domestico	5000	ESECAE	shoulder	2	08:28:00	213640	8274030	23L	sirgass_2000	00:00:00	96	remained	0	4	0	27.4	14.7	21.18	61	5000	four_lane	3	BR_010_BR_020_BR_030	0.0248828	0.248828	0.210242	0	0.0789758	0.00865489	0.250631	0.105662	0.0393076
74	4	2013	june	autumn	3	17_06_2013	wild	small_mammals	Mammals	Primates	Cebidae	Callithrix_penicillata	Sagui	400	ESECAE	lane	1	08:51:00	217308	8280075	23L	sirgass_2000	00:00:00	24	removed	1	1	0	27.4	14.7	21.18	61	2600	two_lane	2	DF_128	0	0.098531	0.482981	0	0.0326048	0.0290219	0	0.317449	0.0229308
75	4	2013	june	autumn	3	17_06_2013	domestic	medium_mammals	Mammals	Carnivora	Felidae	Felis_catus	Gato_Domestico	5000	PNB	lane	1	10:11:00	184507	8270357	23L	sirgass_2000	00:00:00	96	remained	0	4	0	27.4	14.7	21.18	61	775	two_lane	2	DF_001	0	0.00687161	0.41736	0	0.0951175	0.0777577	0	0.386618	0.00723327
76	4	2013	june	autumn	3	17_06_2013	wild	large_birds	Birds	Strigiforme	Strigidae	NA	Coruja	200	PNB	lane	1	10:13:00	184147	8270624	23L	sirgass_2000	00:00:00	96	remained	0	4	0	27.4	14.7	21.18	61	775	two_lane	2	DF_001	0	0.00539957	0.421166	0	0.0943125	0.0853132	0	0.384809	0
77	4	2013	june	autumn	3	17_06_2013	domestic	small_birds	Ave	Passeriformes	Passeridae	Passer_domesticus	Pardal	26	PNB	lane	1	10:22:00	183092	8271403	23L	sirgass_2000	10:04:00	1	removed	1	0	0	27.4	14.7	21.18	61	775	two_lane	2	DF_001	0	0.00504323	0.442003	0	0.101225	0.0860951	0	0.356988	0
78	4	2013	june	autumn	3	17_06_2013	wild	large_birds	Birds	Strigiforme	Strigidae	NA	Coruja	200	PNB	lane	1	10:54:00	168722	8264193	23L	sirgass_2000	10:47:00	1	removed	1	0	0	27.4	14.7	21.18	61	775	two_lane	2	DF_001	0	0.0872845	0.331537	0	0.0319684	0.109195	0	0.296695	0.123204
79	4	2013	june	autumn	3	17_06_2013	wild	medium_mammals	Mammals	Carnivora	Mustelidae	Galictis_cuja	Furao	1600	PNB	shoulder	2	11:12:00	173568	8255598	23L	sirgass_2000	00:00:00	96	remained	0	4	0	27.4	14.7	21.18	61	8000	two_lane	2	DF_001	0	0.0471562	0.338733	0.158387	0.0568754	0.115191	0	0.272858	0
80	4	2013	june	autumn	3	18_06_2013	domestic	Large_mammals	Mammals	Carnivora	Canidae	Canis_familiaris	Cachorro_Domestico	10000	ESECAE	shoulder	2	08:05:00	219448	8273795	23L	sirgass_2000	00:00:00	72	removed	1	3	0	27.2	15.8	21.26	56.5	5000	four_lane	3	BR_010_BR_020_BR_030	0	0.0428983	0.626172	0	0.0284787	0.00036049	0.0439798	0.236842	0
81	4	2013	june	autumn	3	18_06_2013	wild	large_birds	Birds	Accipitriformes	Accipitridae	Rupornis_magnirostris	Gaviao_carijo	300	PNB	shoulder	2	10:54:00	173485	8255888	23L	sirgass_2000	00:00:00	72	removed	1	3	0	27.2	15.8	21.26	56.5	8000	two_lane	2	DF_001	0	0.0392369	0.360691	0.160907	0.0572354	0.13067	0	0.239741	0
82	4	2013	june	autumn	3	18_06_2013	wild	small_reptiles	Reptile	Squamata	Teiidae	Ameiva_ameiva	Lagarto	22	PNB	lane	1	10:54:00	173485	8255888	23L	sirgass_2000	00:00:00	1	removed	1	0	0	27.2	15.8	21.26	56.5	8000	two_lane	2	DF_001	0	0.0392369	0.360691	0.160907	0.0572354	0.13067	0	0.239741	0
83	4	2013	june	autumn	3	18_06_2013	wild	small_birds	Birds	Passeriformes	Thraupidae	Cypsnagra_hirundinacea	Bandoleta	28	IBGE	shoulder	2	11:58:00	192476	8233373	23L	sirgass_2000	00:00:00	1	removed	1	0	0	27.2	15.8	21.26	56.5	2000	two_lane	2	BR_251	0	0.0643885	0.363309	0	0.0723022	0.0748201	0.00359712	0.394245	0.0154676
84	4	2013	june	autumn	3	19_06_2013	wild	small_birds	Birds	Galbuliforme	Bucconidae	Nystalus_chacuru	Joao_Bobo	64	PNB	shoulder	2	10:42:00	173556	8254027	23L	sirgass_2000	00:00:00	24	removed	1	1	0	26.4	14.8	20.64	55.5	8000	two_lane	2	DF_001	0	0.110591	0.188761	0.183357	0.0385447	0.0994236	0.0464697	0.305836	0.00252161
85	4	2013	june	autumn	3	19_06_2013	wild	small_birds	Birds	Passeriformes	Emberizidae	Ammodramus_humeralis	Tico_tico_do_campo	15	IBGE	shoulder	2	11:39:00	192727	8233597	23L	sirgass_2000	00:00:00	1	removed	1	0	0	26.4	14.8	20.64	55.5	2000	two_lane	2	BR_251	0	0.0763414	0.373425	0	0.0694995	0.0720202	0.00360101	0.377026	0.0158444
86	5	2013	july	winter	4	29_07_2013	wild	small_birds	Birds	Passeriformes	Emberizidae	Zonotrichia_capensis	Tico_Tico	16	JBB	shoulder	2	08:46:00	194732	8235333	23L	sirgass_2000	08:35:00	1	removed	1	0	0	28	13.2	20.6	39	2000	two_lane	2	DF_001	0	0.108914	0.48706	0	0.0330697	0.00898634	0.0801582	0.245866	0.015816
87	5	2013	july	winter	4	29_07_2013	domestic	medium_mammals	Mammals	Carnivora	Felidae	Felis_catus	Gato_Domestico	5000	PNB	shoulder	2	10:27:00	180504	8273377	23L	sirgass_2000	00:00:00	96	remained	0	4	0	28	13.2	20.6	39	775	two_lane	2	DF_001	0	0.0537249	0.487464	0	0.0691261	0.0773639	0	0.303367	0
88	5	2013	july	winter	4	29_07_2013	domestic	Large_mammals	Mammals	Carnivora	Canidae	Canis_familiaris	Cachorro_Domestico	10000	PNB	lane	1	10:37:00	182099	8272163	23L	sirgass_2000	00:00:00	48	removed	1	2	0	28	13.2	20.6	39	775	two_lane	2	DF_001	0	0.0384754	0.446602	0	0.115426	0.0733549	0	0.317152	0
89	5	2013	july	winter	4	29_07_2013	wild	small_mammals	Mammals	Didelphimorphia	Didelphidae	Didelphis_albiventris	Gamba_ou_Sarue_	900	ESECAE	shoulder	2	11:25:00	215655	8274018	23L	sirgass_2000	00:00:00	96	remained	0	4	0	28	13.2	20.6	39	5000	four_lane	3	BR_010_BR_020_BR_030	0	0.13808	0.454153	0	0.0711974	0.00395541	0.252787	0.0298454	0.0233729
90	5	2013	july	winter	4	29_07_2013	domestic	Large_mammals	Mammals	Carnivora	Canidae	Canis_familiaris	Cachorro_Domestico	10000	ESECAE	shoulder	2	11:29:00	217160	8273918	23L	sirgass_2000	00:00:00	96	remained	0	4	0	28	13.2	20.6	39	5000	four_lane	3	BR_010_BR_020_BR_030	0	0.121811	0.512037	0	0.0470715	0	0.214517	0.0600072	0.0233561
91	5	2013	july	winter	4	30_07_2013	domestic	Large_mammals	Mammals	Carnivora	Canidae	Canis_familiaris	Cachorro_Domestico	10000	ESECAE	shoulder	2	12:00:00	213823	8274043	23L	sirgass_2000	00:00:00	1	removed	1	0	0	27.1	13.1	20.46	41	5000	four_lane	3	BR_010_BR_020_BR_030	0.0165408	0.248112	0.222222	0	0.0744337	0.00862999	0.257102	0.102481	0.0377562
92	5	2013	july	winter	4	30_07_2013	wild	large_birds	Birds	Strigiforme	Strigidae	NA	Coruja	200	ESECAE	shoulder	2	12:09:00	217374	8274012	23L	sirgass_2000	00:00:00	72	removed	1	3	0	27.1	13.1	20.46	41	5000	four_lane	3	BR_010_BR_020_BR_030	0	0.0980534	0.547945	0	0.0454218	0.00036049	0.197549	0.0670512	0.0216294
93	5	2013	july	winter	4	30_07_2013	wild	large_birds	Birds	Strigiforme	Strigidae	Megascops_choliba	Corujinha_do_Mato	160	ESECAE	shoulder	2	12:42:00	212811	8275464	23L	sirgass_2000	00:00:00	72	removed	1	3	0	27.1	13.1	20.46	41	2600	two_lane	2	DF_128	0.0582524	0.299173	0.222941	0	0.0640058	0.00431499	0.0686803	0.140956	0.115067
94	5	2013	july	winter	4	31_07_2013	wild	small_birds	Birds	Passeriformes	NA	NA	Passeriforme	25	FAL	lane	1	09:20:00	187456	8231161	23L	sirgass_2000	00:00:00	1	removed	1	0	0	26.5	15.9	20.5	43.25	2000	two_lane	2	BR_251	0	0.0392086	0.929137	0	0.0125899	0.0057554	0	0.00431655	0
95	5	2013	july	winter	4	31_07_2013	wild	Large_reptiles	Reptile	Squamata	Viperidae	Crotalus_durissus	Cascavel	550	ESECAE	shoulder	2	13:25:00	212926	8275586	23L	sirgass_2000	00:00:00	48	removed	1	2	0	26.5	15.9	20.5	43.25	2600	two_lane	2	DF_128	0.0582106	0.290693	0.237873	0	0.0589292	0.00107797	0.0610852	0.140855	0.125045
96	6	2013	august	winter	4	26_08_2013	wild	small_birds	Birds	Columbiforme	Columbidae	ColumbiNA_talpacoti	Rolinha	47	ESECAE	lane	1	08:26:00	213721	8274023	23L	sirgass_2000	08:32:00	96	remained	0	4	0	31.6	15.5	23.72	33.75	5000	four_lane	3	BR_010_BR_020_BR_030	0.0208034	0.248565	0.215208	0	0.0753228	0.00860832	0.257532	0.1033	0.0380201
97	6	2013	august	winter	4	26_08_2013	domestic	Large_mammals	Mammals	Carnivora	Canidae	Canis_familiaris	Cachorro_Domestico	10000	ESECAE	lane	1	10:22:00	218591	8281410	23L	sirgass_2000	08:46:00	96	remained	0	4	0	31.6	15.5	23.72	33.75	2600	two_lane	2	DF_128	0.000359583	0.113269	0.440489	0	0.0704782	0.0204962	0	0.329018	0.00862999
98	6	2013	august	winter	4	26_08_2013	domestic	Large_mammals	Mammals	Carnivora	Canidae	Canis_familiaris	Cachorro_Domestico	10000	PNB	lane	1	10:22:00	173728	8271915	23L	sirgass_2000	10:03:00	1	removed	1	0	0	31.6	15.5	23.72	33.75	775	dirt_road	1	DF_001	0	0.0503235	0.428828	0	0.042775	0.268512	0	0.150971	0.0517613
99	6	2013	august	winter	4	26_08_2013	wild	small_mammals	Mammals	Rodentia	Cricetidae	Necromys_lasiurus	Rato_silvestre	40	PNB	lane	1	11:03:00	173316	8252893	23L	sirgass_2000	10:44:00	96	remained	0	4	0	31.6	15.5	23.72	33.75	8000	two_lane	2	DF_001	0	0.122126	0.123922	0.17852	0.0369971	0.0765086	0.206537	0.215876	0.00862069
100	6	2013	august	winter	4	26_08_2013	domestic	large_birds	Ave	Columbiforme	Columbidae	Columba_livia	Pombo	360	PNB	shoulder	2	11:03:00	173318	8252898	23L	sirgass_2000	10:44:00	96	remained	0	4	0	31.6	15.5	23.72	33.75	8000	two_lane	2	DF_001	0	0.122302	0.124101	0.179137	0.0370504	0.0766187	0.205396	0.216187	0.00827338
101	6	2013	august	winter	4	27_08_2013	wild	medium_mammals	Mammals	Carnivora	Mephitidae	Conepatus_semistriatus	Jaritataca	3400	ESECAE	shoulder	2	08:52:00	226496	8278921	23L	sirgass_2000	09:09:00	24	removed	1	1	0	28.4	15.9	20.78	52.5	951	two_lane	2	BR_010_DF_345	0	0.0186648	0.460517	0	0.0398421	0.0294329	0	0.432161	0
102	6	2013	august	winter	4	28_08_2013	domestic	medium_mammals	Mammals	Carnivora	Felidae	Felis_catus	Gato_Domestico	5000	ESECAE	lane	1	09:27:00	216230	8274029	23L	sirgass_2000	08:28:00	24	removed	1	1	0	28.3	12	19.48	31	5000	four_lane	3	BR_010_BR_020_BR_030	0	0.13808	0.464222	0	0.0740741	0.00143833	0.243078	0.0334412	0.0233729
103	7	2013	september	winter	4	16_09_2013	domestic	Large_mammals	Mammals	Carnivora	Canidae	Canis_familiaris	Cachorro_Domestico	10000	PNB	shoulder	2	10:40:00	168827	8263436	23L	sirgass_2000	10:42:00	72	removed	1	3	0	32.2	19.4	24.84	42.75	775	two_lane	2	DF_001	0	0.0967974	0.374955	0	0.0392227	0.0996761	0	0.278158	0.0924793
104	7	2013	september	winter	4	16_09_2013	domestic	large_birds	Ave	Columbiforme	Columbidae	Columba_livia	Pombo	360	PNB	lane	1	11:00:00	173019	8252166	23L	sirgass_2000	10:55:00	24	removed	1	1	0	32.2	19.4	24.84	42.75	8000	two_lane	2	DF_001	0	0.132327	0.0949299	0.167206	0.030205	0.080187	0.320748	0.132327	0.00898957
105	7	2013	september	winter	4	17_09_2013	wild	large_birds	Birds	Strigiforme	Strigidae	NA	Coruja	200	ESECAE	lane	1	07:43:00	216893	8273943	23L	sirgass_2000	07:59:00	1	removed	1	0	0	32.6	19.2	26.4	39.75	5000	four_lane	3	BR_010_BR_020_BR_030	0	0.136233	0.48059	0	0.0611071	0	0.226815	0.0503235	0.0233645
106	7	2013	september	winter	4	18_09_2013	wild	small_mammals	Mammals	Didelphimorphia	Didelphidae	Didelphis_albiventris	Gamba_ou_Sarue_	900	ESECAE	shoulder	2	08:42:00	216414	8279181	23L	sirgass_2000	08:45:00	48	removed	1	2	36	26.9	15.9	20.2	76.25	2600	two_lane	2	DF_128	0	0.0759857	0.480645	0	0.0362007	0.0175627	0	0.26129	0.113978
107	8	2013	october	spring	1	21_10_2013	wild	small_birds	Birds	Apodiforme	Trochilidae	NA	Beija_flor	8	ESECAE	lane	1	08:05:00	217113	8273930	23L	sirgass_2000	08:05:00	1	removed	1	0	0	30.4	17	22.76	62.75	5000	four_lane	3	BR_010_BR_020_BR_030	0	0.124373	0.50681	0	0.0483871	0	0.217563	0.0580645	0.0232975
108	8	2013	october	spring	1	21_10_2013	wild	small_reptiles	Reptile	Squamata	Dipsadidae	Oxyrhopus_sp	Coral_falsa	80	ESECAE	shoulder	2	08:50:00	213086	8273768	23L	sirgass_2000	08:08:00	96	remained	0	4	0	30.4	17	22.76	62.75	2600	two_lane	2	DF_128	0.0445723	0.264198	0.168943	0	0.0805176	0.00898634	0.228972	0.106758	0.0639827
109	8	2013	october	spring	1	21_10_2013	wild	small_mammals	Mammals	Chiroptera	Phyllostomidae	Glossophaga_sp	Morcego	20	ESECAE	shoulder	2	08:58:00	212806	8275467	23L	sirgass_2000	08:12:00	96	remained	0	4	0	30.4	17	22.76	62.75	2600	two_lane	2	DF_128	0.0581479	0.298636	0.222541	0	0.0638909	0.00430725	0.0681981	0.140704	0.117014
110	8	2013	october	spring	1	21_10_2013	wild	small_birds	Birds	Passeriformes	Emberizidae	Volatinia_jacariNA	Tiziu	10	ESECAE	shoulder	2	09:08:00	216050	8278804	23L	sirgass_2000	09:08:00	1	removed	1	0	0	30.4	17	22.76	62.75	2600	two_lane	2	DF_128	0	0.0723022	0.476259	0	0.0384892	0.0115108	0	0.252158	0.139928
111	8	2013	october	spring	1	21_10_2013	domestic	medium_mammals	Mammals	Carnivora	Felidae	Felis_catus	Gato_Domestico	5000	ESECAE	shoulder	2	09:14:00	217470	8280267	23L	sirgass_2000	08:23:00	96	remained	0	4	0	30.4	17	22.76	62.75	2600	two_lane	2	DF_128	0	0.104885	0.479167	0	0.0341236	0.0269397	0	0.326868	0.0118534
112	8	2013	october	spring	1	21_10_2013	wild	Large_mammals	Mammals	Carnivora	Canidae	Cerdocyon_thous	Cachorro_do_Mato	5700	ESECAE	lane	1	09:43:00	225269	8277260	23L	sirgass_2000	08:39:00	96	remained	0	4	0	30.4	17	22.76	62.75	951	two_lane	2	BR_010_DF_345	0	0.0157989	0.505925	0.000359066	0.0265709	0.0193896	0	0.397127	0
113	8	2013	october	spring	1	21_10_2013	wild	Large_reptiles	Reptile	Squamata	Boidae	Epicrates_cenchria	Jiboia_arco_iris	3000	PNB	shoulder	2	10:22:00	187675	8268056	23L	sirgass_2000	10:22:00	1	removed	1	0	0	30.4	17	22.76	62.75	775	two_lane	2	DF_001	0	0.0369176	0.567742	0	0.0573477	0.0437276	0.00537634	0.205018	0.0749104
114	8	2013	october	spring	1	21_10_2013	wild	small_reptiles	Reptile	Squamata	Teiidae	Cnemidophorus_ocellifer	Calango	4	PNB	lane	1	10:31:00	184641	8270288	23L	sirgass_2000	10:31:00	1	removed	1	0	0	30.4	17	22.76	62.75	775	two_lane	2	DF_001	0	0.00684438	0.413905	0	0.0958213	0.0763689	0	0.386888	0.0115274
115	8	2013	october	spring	1	21_10_2013	domestic	Large_mammals	Mammals	Carnivora	Canidae	Canis_familiaris	Cachorro_Domestico	10000	PNB	shoulder	2	10:47:00	181761	8272431	23L	sirgass_2000	10:02:00	96	remained	0	4	0	30.4	17	22.76	62.75	775	two_lane	2	DF_001	0	0.0500901	0.445045	0	0.115315	0.0742342	0	0.306306	0
116	8	2013	october	spring	1	21_10_2013	wild	small_birds	Birds	Passeriformes	Emberizidae	Volatinia_jacariNA	Tiziu	10	FAL	lane	1	12:34:00	186987	8230964	23L	sirgass_2000	12:34:00	1	removed	1	0	0	30.4	17	22.76	62.75	2000	two_lane	2	BR_251	0	0.0308354	0.930441	0	0.0236644	0.00645393	0	0	0
117	8	2013	october	spring	1	21_10_2013	wild	small_birds	Birds	Passeriformes	Emberizidae	Volatinia_jacariNA	Tiziu	10	FAL	lane	1	13:39:00	188344	8231497	23L	sirgass_2000	13:39:00	1	removed	1	0	0	30.4	17	22.76	62.75	2000	two_lane	2	BR_251	0	0.0467458	0.873427	0	0.01726	0.0100683	0	0.0442287	0
118	8	2013	october	spring	1	21_10_2013	wild	Large_reptiles	Reptile	Squamata	Dipsadidae	Pseudoboa_nigra	Cobra_Preta	180	JBB	shoulder	2	13:01:00	198069	8239748	23L	sirgass_2000	13:01:00	1	removed	1	0	0	30.4	17	22.76	62.75	7000	four_lane	3	DF_001	0	0.083901	0.55934	0	0.0609537	0.0265328	0.0849767	0.163858	0
119	8	2013	october	spring	1	21_10_2013	wild	small_birds	Birds	Passeriformes	NA	NA	Passeriforme	25	JBB	lane	1	13:04:00	198100	8240183	23L	sirgass_2000	13:04:00	1	removed	1	0	0	30.4	17	22.76	62.75	7000	four_lane	3	DF_001	0	0.0839612	0.524578	0	0.0577682	0.039469	0.108719	0.163617	0
120	8	2013	october	spring	1	22_10_2013	wild	medium_mammals	Mammals	Carnivora	Canidae	Pseudalopex_vetulus	Raposinha	3400	ESECAE	shoulder	2	07:39:00	217901	8273859	23L	sirgass_2000	07:56:00	72	removed	1	3	1.9	30.2	17.8	23.12	67.25	5000	four_lane	3	BR_010_BR_020_BR_030	0	0.0777538	0.564075	0	0.0428366	0	0.172426	0.104032	0.0172786
121	8	2013	october	spring	1	22_10_2013	wild	small_birds	Birds	Caprimulgiforme	Caprimulgidae	Chordeiles_pusillus	Bacurauzinho	34	ESECAE	shoulder	2	08:05:00	217964	8273890	23L	sirgass_2000	08:05:00	1	removed	1	0	1.9	30.2	17.8	23.12	67.25	5000	four_lane	3	BR_010_BR_020_BR_030	0	0.0759813	0.574001	0	0.0417717	0	0.165646	0.103709	0.0172848
122	8	2013	october	spring	1	22_10_2013	wild	small_birds	Birds	Passeriformes	Emberizidae	NA	Passeriforme	25	ESECAE	shoulder	2	08:31:00	213721	8274023	23L	sirgass_2000	08:31:00	1	removed	1	0	1.9	30.2	17.8	23.12	67.25	5000	four_lane	3	BR_010_BR_020_BR_030	0.0208034	0.248565	0.215208	0	0.0753228	0.00860832	0.257532	0.1033	0.0380201
123	8	2013	october	spring	1	22_10_2013	wild	small_birds	Birds	Passeriformes	NA	NA	Passeriforme	25	ESECAE	lane	1	09:04:00	219146	8281572	23L	sirgass_2000	08:25:00	72	removed	1	3	1.9	30.2	17.8	23.12	67.25	33	dirt_road	1	DF_205	0.000359583	0.109673	0.490111	0	0.0650845	0.0233729	0	0.280834	0.0118662
124	8	2013	october	spring	1	22_10_2013	wild	small_birds	Birds	Passeriformes	NA	NA	Passeriforme	25	PNB	lane	1	10:35:00	174603	8273047	23L	sirgass_2000	10:35:00	1	removed	1	0	1.9	30.2	17.8	23.12	67.25	775	dirt_road	1	DF_001	0	0.070321	0.385503	0	0.0807789	0.289939	0	0.056978	0.107825
125	8	2013	october	spring	1	22_10_2013	wild	Large_reptiles	Reptile	Squamata	Dipsadidae	Boiruna_maculata	Cobra_Preta	180	JBB	shoulder	2	12:30:00	197954	8241163	23L	sirgass_2000	12:30:00	1	removed	1	0	1.9	30.2	17.8	23.12	67.25	7000	four_lane	3	DF_001	0.000359712	0.104317	0.402878	0	0.12482	0.052518	0.140647	0.151079	0
126	8	2013	october	spring	1	23_10_2013	wild	Large_reptiles	Reptile	Squamata	Viperidae	Crotalus_durissus	Cascavel	550	ESECAE	shoulder	2	08:21:00	219836	8273857	23L	sirgass_2000	08:01:00	48	removed	1	2	0.5	29.9	17.4	23.92	44.25	5000	four_lane	3	BR_010_BR_020_BR_030	0	0.0275887	0.635256	0	0.0265138	0.000358295	0.0222143	0.266571	0
127	8	2013	october	spring	1	23_10_2013	wild	small_reptiles	Reptile	Squamata	Teiidae	Ameiva_ameiva	Lagarto	22	ESECAE	shoulder	2	08:25:00	219164	8273793	23L	sirgass_2000	08:03:00	48	removed	1	2	0.5	29.9	17.4	23.92	44.25	5000	four_lane	3	BR_010_BR_020_BR_030	0	0.0514759	0.62275	0	0.0298776	0	0.0651548	0.209503	0
128	8	2013	october	spring	1	23_10_2013	wild	small_birds	Birds	Passeriformes	Tyrannidae	Tyrannus_savana	Tesourinha	33	ESECAE	shoulder	2	08:40:00	214139	8274121	23L	sirgass_2000	08:06:00	48	removed	1	2	0.5	29.9	17.4	23.92	44.25	5000	four_lane	3	BR_010_BR_020_BR_030	0.00720721	0.234595	0.265586	0	0.0735135	0.00864865	0.245766	0.0958559	0.0363964
129	8	2013	october	spring	1	23_10_2013	wild	large_birds	Birds	Strigiforme	Strigidae	Athene_cunicularia	Coruja_buraqueira	200	ESECAE	shoulder	2	08:59:00	215471	8278211	23L	sirgass_2000	08:59:00	1	removed	1	0	0.5	29.9	17.4	23.92	44.25	2600	two_lane	2	DF_128	0	0.075009	0.464479	0	0.0274071	0.00685179	0	0.247386	0.171655
130	8	2013	october	spring	1	23_10_2013	wild	small_birds	Birds	Passeriformes	NA	NA	Passeriforme	25	ESECAE	lane	1	09:03:00	216848	8279625	23L	sirgass_2000	09:03:00	1	removed	1	0	0.5	29.9	17.4	23.92	44.25	2600	two_lane	2	DF_128	0	0.0839337	0.479467	0	0.0324207	0.0306196	0	0.290706	0.0666427
131	8	2013	october	spring	1	23_10_2013	domestic	Large_mammals	Mammals	Carnivora	Canidae	Canis_familiaris	Cachorro_Domestico	10000	PNB	shoulder	2	11:10:00	169127	8259980	23L	sirgass_2000	10:32:00	48	removed	1	2	0.5	29.9	17.4	23.92	44.25	775	two_lane	2	DF_001	0	0.0692253	0.278694	0.0903874	0.0638451	0.123027	0	0.30165	0.0559541
132	9	2013	november	spring	1	04_11_2013	wild	small_birds	Birds	NA	NA	NA	ave_silvestre	NA	JBB	shoulder	2	09:25:00	194492	8235123	23L	sirgass_2000	09:25:00	1	removed	1	0	0	28.4	17.6	23.44	50.25	2000	two_lane	2	DF_001	0	0.110872	0.468963	0	0.0340868	0.0107643	0.0706853	0.269824	0.0157876
133	9	2013	november	spring	1	04_11_2013	wild	small_birds	Birds	Passeriformes	Emberizidae	Volatinia_jacariNA	Tiziu	10	FAL	shoulder	2	09:36:00	189980	8232155	23L	sirgass_2000	09:36:00	1	removed	1	0	0	28.4	17.6	23.44	50.25	2000	two_lane	2	BR_251	0	0.0501433	0.681232	0	0.0401146	0.0390401	0.000358166	0.180516	0
134	9	2013	november	spring	1	04_11_2013	wild	small_reptiles	Reptile	Squamata	Dipsadidae	Oxyrhopus_rhombifer	Coral_falsa	80	PNB	shoulder	2	10:44:00	173722	8254366	23L	sirgass_2000	10:44:00	1	removed	1	0	0	28.4	17.6	23.44	50.25	8000	two_lane	2	DF_001	0	0.102915	0.222382	0.162289	0.0403023	0.105074	0.0197913	0.325657	0.000359842
135	9	2013	november	spring	1	04_11_2013	wild	small_birds	Birds	Apodiforme	Trochilidae	Polytmus_theresiae	Beija_flor	8	PNB	shoulder	2	10:51:00	173510	8255747	23L	sirgass_2000	10:51:00	1	removed	1	0	0	28.4	17.6	23.44	50.25	8000	two_lane	2	DF_001	0	0.0430535	0.350217	0.160999	0.0568017	0.123734	0	0.25398	0
136	9	2013	november	spring	1	04_11_2013	domestic	medium_mammals	Mammals	Carnivora	Felidae	Felis_catus	Gato_Domestico	5000	PNB	shoulder	2	11:05:00	168886	8262759	23L	sirgass_2000	00:00:00	24	removed	1	1	0	28.4	17.6	23.44	50.25	775	two_lane	2	DF_001	0	0.0981727	0.401648	0	0.04622	0.082766	0	0.27732	0.0770333
137	9	2013	november	spring	1	04_11_2013	wild	small_birds	Birds	Passeriformes	NA	NA	Passeriforme	25	PNB	lane	1	11:11:00	168866	8264700	23L	sirgass_2000	11:11:00	1	removed	1	0	0	28.4	17.6	23.44	50.25	775	dirt_road	1	DF_001	0	0.075009	0.323116	0	0.0364226	0.134511	0	0.275875	0.137036
138	9	2013	november	spring	1	04_11_2013	wild	Large_reptiles	Reptile	Squamata	Boidae	Boa_constrictor	jiboia	4000	PNB	shoulder	2	11:45:00	184900	8270052	23L	sirgass_2000	00:00:00	96	remained	0	4	0	28.4	17.6	23.44	50.25	775	two_lane	2	DF_001	0	0.00650289	0.42341	0	0.0892341	0.0679191	0	0.380058	0.0238439
139	9	2013	november	spring	1	04_11_2013	wild	large_birds	Birds	Tinamiforme	TiNAmidae	Rhynchotus_rufescens	Perdiz	300	ESECAE	shoulder	2	13:02:00	219227	8273734	23L	sirgass_2000	00:00:00	96	remained	0	4	0	28.4	17.6	23.44	50.25	5000	four_lane	3	BR_010_BR_020_BR_030	0	0.05	0.613669	0	0.0298561	0	0.0622302	0.223022	0
140	9	2013	november	spring	1	04_11_2013	domestic	large_birds	Ave	Galliforme	Phasianidae	Gallus_gallus_domesticus	Galinha	1500	ESECAE	lane	1	13:04:00	219457	8273722	23L	sirgass_2000	13:04:00	1	removed	1	0	0	28.4	17.6	23.44	50.25	5000	four_lane	3	BR_010_BR_020_BR_030	0	0.043181	0.617848	0	0.0277078	0.000359842	0.0449802	0.244692	0
141	9	2013	november	spring	1	04_11_2013	wild	small_birds	Birds	Apodiforme	Trochilidae	Polytmus_theresiae	Beija_flor	8	ESECAE	shoulder	2	13:36:00	212543	8275008	23L	sirgass_2000	13:36:00	1	removed	1	0	0	28.4	17.6	23.44	50.25	2600	two_lane	2	DF_128	0.0582734	0.311511	0.184892	0	0.0852518	0.00647482	0.0978417	0.139209	0.0874101
142	9	2013	november	spring	1	04_11_2013	wild	large_birds	Birds	Strigiforme	Strigidae	Asio_clamator	Coruja_orelhuda	400	ESECAE	shoulder	2	13:40:00	212667	8275311	23L	sirgass_2000	13:40:00	1	removed	1	0	0	28.4	17.6	23.44	50.25	2600	two_lane	2	DF_128	0.0583994	0.303893	0.206561	0	0.0764239	0.00648882	0.074261	0.141312	0.105263
143	9	2013	november	spring	1	04_11_2013	wild	small_birds	Birds	Passeriformes	Emberizidae	Volatinia_jacariNA	Tiziu	10	ESECAE	lane	1	13:45:00	214070	8276770	23L	sirgass_2000	13:45:00	1	removed	1	0	0	28.4	17.6	23.44	50.25	2600	two_lane	2	DF_128	0.0233645	0.159597	0.374191	0	0.038821	0.00215672	0	0.157441	0.222502
144	9	2013	november	spring	1	04_11_2013	wild	small_birds	Birds	Passeriformes	Emberizidae	Volatinia_jacariNA	Tiziu	10	ESECAE	lane	1	13:54:00	217153	8279943	23L	sirgass_2000	13:54:00	1	removed	1	0	0	28.4	17.6	23.44	50.25	2600	two_lane	2	DF_128	0	0.0924128	0.481841	0	0.032722	0.0298454	0	0.312118	0.03452
145	9	2013	november	spring	1	05_11_2013	domestic	Large_mammals	Mammals	Carnivora	Canidae	Canis_familiaris	Cachorro_Domestico	10000	PNB	lane	1	12:08:00	187366	8268269	23L	sirgass_2000	00:00:00	24	removed	1	1	14.2	24.1	17.2	19.14	92.5	775	two_lane	2	DF_001	0.000359454	0.0327103	0.543853	0	0.0564342	0.0420561	0.00179727	0.236161	0.077642
146	9	2013	november	spring	1	05_11_2013	wild	small_birds	Birds	Cuculiforme	Cuculidae	Crotophaga_ani	Anu_preto	100	ESECAE	shoulder	2	12:51:00	218955	8273757	23L	sirgass_2000	00:00:00	72	removed	1	3	14.2	24.1	17.2	19.14	92.5	5000	four_lane	3	BR_010_BR_020_BR_030	0	0.0592672	0.608836	0	0.0301724	0	0.0854885	0.195043	0
147	9	2013	november	spring	1	05_11_2013	wild	Large_reptiles	Reptile	Squamata	Viperidae	Crotalus_durissus	Cascavel	550	ESECAE	shoulder	2	13:34:00	212547	8275024	23L	sirgass_2000	00:00:00	72	removed	1	3	14.2	24.1	17.2	19.14	92.5	2600	two_lane	2	DF_128	0.0583153	0.312095	0.187185	0	0.0849532	0.00647948	0.0964723	0.140029	0.0856731
148	9	2013	november	spring	1	05_11_2013	domestic	Large_mammals	Mammals	Carnivora	Canidae	Canis_familiaris	Cachorro_Domestico	10000	ESECAE	shoulder	2	13:45:00	215767	8278516	23L	sirgass_2000	00:00:00	72	removed	1	3	14.2	24.1	17.2	19.14	92.5	2600	two_lane	2	DF_128	0	0.0728453	0.472773	0	0.0371439	0.00865489	0	0.244861	0.156509
149	9	2013	november	spring	1	05_11_2013	domestic	Large_mammals	Mammals	Carnivora	Canidae	Canis_familiaris	Cachorro_Domestico	10000	ESECAE	shoulder	2	13:53:00	217464	8280260	23L	sirgass_2000	00:00:00	72	removed	1	3	14.2	24.1	17.2	19.14	92.5	2600	two_lane	2	DF_128	0	0.104601	0.479152	0	0.0341481	0.026959	0	0.326743	0.0122214
150	9	2013	november	spring	1	06_11_2013	wild	small_birds	Birds	Passeriformes	Emberizidae	Zonotrichia_capensis	Tico_tico	16	PNB	lane	1	10:36:00	173247	8252700	23L	sirgass_2000	10:36:00	1	removed	1	0	8	23.1	16.8	19.1	92	8000	two_lane	2	DF_001	0	0.124596	0.115978	0.175583	0.0369838	0.0779174	0.237702	0.191741	0.00861759
151	9	2013	november	spring	1	06_11_2013	wild	small_birds	Birds	Passeriformes	Emberizidae	Volatinia_jacariNA	Tiziu	10	PNB	lane	1	11:00:00	168851	8263149	23L	sirgass_2000	11:00:00	1	removed	1	0	8	23.1	16.8	19.1	92	775	two_lane	2	DF_001	0	0.0965196	0.386437	0	0.0430571	0.0936491	0	0.281306	0.0818084
152	9	2013	november	spring	1	06_11_2013	wild	small_birds	Birds	Caprimulgiforme	Caprimulgidae	Chordeiles_pusillus	Bacurauzinho	34	PNB	shoulder	2	11:39:00	182534	8271881	23L	sirgass_2000	11:39:00	1	removed	1	0	8	23.1	16.8	19.1	92	775	two_lane	2	DF_001	0	0.0216294	0.445205	0	0.115717	0.0746215	0	0.333814	0
153	9	2013	november	spring	1	06_11_2013	wild	small_birds	Birds	Passeriformes	NA	NA	Passeriforme	25	PNB	lane	1	11:55:00	185956	8269306	23L	sirgass_2000	11:55:00	1	removed	1	0	8	23.1	16.8	19.1	92	775	two_lane	2	DF_001	0.00036036	0.012973	0.453694	0	0.0601802	0.0533333	0	0.344144	0.0663063
154	10	2013	december	spring	1	16_12_2013	wild	medium_mammals	Mammals	Carnivora	Mustelidae	Galictis_cuja	Furao	1600	JBB	shoulder	2	08:33:00	195699	8236197	23L	sirgass_2000	08:33:00	1	removed	1	0	5.4	24.5	18.3	20.64	89.75	2000	two_lane	2	DF_001	0	0.093132	0.562028	0	0.0154621	0.0111471	0.108594	0.171521	0.0158216
155	10	2013	december	spring	1	16_12_2013	wild	small_birds	Birds	Passeriformes	Emberizidae	Volatinia_jacariNA	Tiziu	10	FAL	shoulder	2	08:56:00	189926	8232131	23L	sirgass_2000	08:56:00	1	removed	1	0	5.4	24.5	18.3	20.64	89.75	2000	two_lane	2	BR_251	0	0.0492806	0.68705	0	0.0402878	0.0370504	0	0.177698	0
156	10	2013	december	spring	1	16_12_2013	wild	small_birds	Birds	NA	NA	NA	ave_silvestre	NA	PNB	shoulder	2	10:08:00	173466	8253243	23L	sirgass_2000	10:08:00	1	removed	1	0	5.4	24.5	18.3	20.64	89.75	8000	two_lane	2	DF_001	0	0.120014	0.136903	0.176069	0.0355731	0.0794107	0.15451	0.26087	0.00682716
157	10	2013	december	spring	1	16_12_2013	domestic	Large_mammals	Mammals	Carnivora	Canidae	Canis_familiaris	Cachorro_Domestico	10000	PNB	shoulder	2	10:16:00	173485	8255763	23L	sirgass_2000	09:00:00	96	remained	0	4	5.4	24.5	18.3	20.64	89.75	8000	two_lane	2	DF_001	0	0.0422636	0.34957	0.164398	0.0576648	0.124284	0	0.250358	0
158	10	2013	december	spring	1	16_12_2013	wild	small_birds	Birds	Apodiforme	Trochilidae	NA	Beija_flor	8	PNB	lane	1	10:32:00	168924	8262294	23L	sirgass_2000	10:32:00	1	removed	1	0	5.4	24.5	18.3	20.64	89.75	775	two_lane	2	DF_001	0	0.0977011	0.396552	0	0.0470546	0.0994971	0	0.268678	0.0739943
159	10	2013	december	spring	1	16_12_2013	wild	small_birds	Birds	Passeriformes	Emberizidae	Volatinia_jacariNA	Tiziu	10	PNB	shoulder	2	10:39:00	168830	8263396	23L	sirgass_2000	10:39:00	1	removed	1	0	5.4	24.5	18.3	20.64	89.75	775	two_lane	2	DF_001	0	0.0975522	0.37581	0	0.0399568	0.0982721	0	0.279338	0.0903528
160	10	2013	december	spring	1	16_12_2013	wild	small_birds	Birds	Passeriformes	Emberizidae	Volatinia_jacariNA	Tiziu	10	PNB	shoulder	2	10:43:00	168809	8263663	23L	sirgass_2000	10:43:00	1	removed	1	0	5.4	24.5	18.3	20.64	89.75	775	two_lane	2	DF_001	0	0.0964029	0.366187	0	0.0377698	0.102878	0	0.276259	0.101799
161	10	2013	december	spring	1	16_12_2013	wild	small_birds	Birds	Passeriformes	Emberizidae	Volatinia_jacariNA	Tiziu	10	PNB	shoulder	2	12:01:00	184494	8270384	23L	sirgass_2000	12:10:00	72	removed	1	3	5.4	24.5	18.3	20.64	89.75	775	two_lane	2	DF_001	0	0.00682226	0.416876	0	0.0933573	0.0797127	0	0.387433	0.00682226
162	10	2013	december	spring	1	16_12_2013	wild	small_birds	Birds	Passeriformes	Emberizidae	Volatinia_jacariNA	Tiziu	10	ESECAE	shoulder	2	12:47:00	215884	8274021	23L	sirgass_2000	13:25:00	48	removed	1	2	5.4	24.5	18.3	20.64	89.75	5000	four_lane	3	BR_010_BR_020_BR_030	0	0.136003	0.45671	0	0.0721501	0.00252525	0.252525	0.0313853	0.0234488
163	10	2013	december	spring	1	16_12_2013	wild	small_birds	Birds	Passeriformes	Tyrannidae	Machetornis_rixosa	Suiriri_Cavalheiro	32	ESECAE	shoulder	2	13:09:00	222426	8274666	23L	sirgass_2000	13:12:00	24	removed	1	1	5.4	24.5	18.3	20.64	89.75	5000	four_lane	3	BR_010_BR_020_BR_030	0	0.0151134	0.50018	0.00503778	0.0107953	0.00179921	0	0.435049	0
164	10	2013	december	spring	1	16_12_2013	wild	small_birds	Birds	Cuculiforme	Cuculidae	Crotophaga_ani	Anu_preto	100	ESECAE	shoulder	2	13:15:00	220398	8274033	23L	sirgass_2000	13:56:00	48	removed	1	2	5.4	24.5	18.3	20.64	89.75	5000	four_lane	3	BR_010_BR_020_BR_030	0	0.0215672	0.622933	0	0.0258807	0.00143781	0.00431344	0.301941	0
165	10	2013	december	spring	1	16_12_2013	wild	small_birds	Birds	Passeriformes	Tyrannidae	Tyrannus_savana	Tesourinha	33	ESECAE	shoulder	2	13:18:00	220234	8273983	23L	sirgass_2000	13:18:00	1	removed	1	0	5.4	24.5	18.3	20.64	89.75	5000	four_lane	3	BR_010_BR_020_BR_030	0	0.0223665	0.627345	0	0.025974	0.00108225	0.00901876	0.292208	0
166	10	2013	december	spring	1	16_12_2013	wild	large_birds	Birds	Tinamiforme	TiNAmidae	Nhotura_sp.	CodorNA	300	ESECAE	shoulder	2	13:25:00	218622	8273838	23L	sirgass_2000	10:32:00	96	remained	0	4	5.4	24.5	18.3	20.64	89.75	5000	four_lane	3	BR_010_BR_020_BR_030	0	0.0644117	0.601295	0	0.034185	0	0.109032	0.160489	0.00935588
167	10	2013	december	spring	1	16_12_2013	wild	small_mammals	Mammals	Chiroptera	Phyllostomidae	NA	Morcego	20	ESECAE	shoulder	2	13:26:00	218630	8273837	23L	sirgass_2000	10:32:00	96	remained	0	4	5.4	24.5	18.3	20.64	89.75	5000	four_lane	3	BR_010_BR_020_BR_030	0	0.0643653	0.601942	0	0.0341604	0	0.108594	0.160734	0.00898957
168	10	2013	december	spring	1	16_12_2013	wild	Large_reptiles	Reptile	Testudines	Chelidae	Phrynops_geoffroanus	Cagado_de_barbicha	2000	ESECAE	shoulder	2	13:43:00	212562	8274668	23L	sirgass_2000	14:44:00	96	remained	0	4	5.4	24.5	18.3	20.64	89.75	2600	two_lane	2	DF_128	0.0583363	0.313648	0.175729	0	0.0900252	0.00648181	0.134318	0.121714	0.0694995
169	10	2013	december	spring	1	16_12_2013	wild	small_birds	Birds	Passeriformes	Emberizidae	Volatinia_jacariNA	Tiziu	10	ESECAE	shoulder	2	13:49:00	212822	8275500	23L	sirgass_2000	10:48:00	96	remained	0	4	5.4	24.5	18.3	20.64	89.75	2600	two_lane	2	DF_128	0.0583573	0.298631	0.225504	0	0.0626801	0.00288184	0.0670029	0.14121	0.117435
170	10	2013	december	spring	1	17_12_2013	wild	small_birds	Birds	Passeriformes	Emberizidae	Volatinia_jacariNA	Tiziu	10	JBB	shoulder	2	08:07:00	197068	8237504	23L	sirgass_2000	08:27:00	24	removed	1	1	3.1	28.2	18.6	22.02	81.75	7000	four_lane	3	DF_001	0	0.113309	0.607554	0	0.0557554	0.0165468	0.0489209	0.135971	0
171	10	2013	december	spring	1	17_12_2013	wild	small_birds	Birds	Passeriformes	NA	NA	Passeriforme	25	JBB	lane	1	08:32:00	196350	8236784	23L	sirgass_2000	08:32:00	1	removed	1	0	3.1	28.2	18.6	22.02	81.75	2000	two_lane	2	DF_001	0	0.0829427	0.602596	0	0.0288496	0.0133429	0.0944825	0.147494	0.00649116
172	10	2013	december	spring	1	17_12_2013	wild	small_birds	Birds	Passeriformes	Tyrannidae	Machetornis_rixosa	Suiriri_Cavalheiro	32	PNB	lane	1	12:00:00	187209	8268388	23L	sirgass_2000	12:42:00	24	removed	1	1	3.1	28.2	18.6	22.02	81.75	775	two_lane	2	DF_001	0.000358166	0.0308023	0.528295	0	0.0583811	0.0429799	0.000358166	0.251074	0.0791547
173	10	2013	december	spring	1	17_12_2013	domestic	large_birds	Ave	Columbiforme	Columbidae	Columba_livia	Pombo	360	ESECAE	shoulder	2	12:39:00	213579	8273941	23L	sirgass_2000	10:14:00	72	removed	1	3	3.1	28.2	18.6	22.02	81.75	5000	four_lane	3	BR_010_BR_020_BR_030	0.0269107	0.249013	0.200574	0	0.0782203	0.00861141	0.257983	0.105131	0.0409042
174	10	2013	december	spring	1	17_12_2013	wild	small_mammals	Mammals	Chiroptera	Phyllostomidae	NA	Morcego	20	ESECAE	shoulder	2	13:26:00	218857	8273817	23L	sirgass_2000	10:30:00	72	removed	1	3	3.1	28.2	18.6	22.02	81.75	5000	four_lane	3	BR_010_BR_020_BR_030	0	0.0614666	0.611431	0	0.0319914	0	0.0905823	0.180805	0.00215672
175	10	2013	december	spring	1	17_12_2013	wild	small_birds	Birds	Passeriformes	Emberizidae	Volatinia_jacariNA	Tiziu	10	ESECAE	shoulder	2	13:31:00	218429	8273842	23L	sirgass_2000	10:35:00	72	removed	1	3	3.1	28.2	18.6	22.02	81.75	5000	four_lane	3	BR_010_BR_020_BR_030	0	0.0659498	0.591039	0	0.0362007	0	0.126523	0.144444	0.0146953
176	10	2013	december	spring	1	17_12_2013	domestic	large_birds	Ave	Columbiforme	Columbidae	Columba_livia	Pombo	360	ESECAE	shoulder	2	13:46:00	215453	8274022	23L	sirgass_2000	10:40:00	72	removed	1	3	3.1	28.2	18.6	22.02	81.75	5000	four_lane	3	BR_010_BR_020_BR_030	0	0.147281	0.441844	0	0.0716601	0.00468131	0.25027	0.0331293	0.0234066
177	10	2013	december	spring	1	17_12_2013	wild	Large_reptiles	Reptile	Testudines	Chelidae	Phrynops_geoffroanus	Cagado_de_barbicha	2000	ESECAE	shoulder	2	13:57:00	212649	8275288	23L	sirgass_2000	14:28:00	24	removed	1	1	3.1	28.2	18.6	22.02	81.75	2600	two_lane	2	DF_128	0.0584205	0.304364	0.20339	0	0.0786152	0.00649116	0.0753696	0.141363	0.10458
178	10	2013	december	spring	1	17_12_2013	wild	small_birds	Birds	Passeriformes	Tyrannidae	Tyrannus_savana	Tesourinha	33	ESECAE	shoulder	2	14:08:00	215102	8277838	23L	sirgass_2000	14:40:00	24	removed	1	1	3.1	28.2	18.6	22.02	81.75	2600	two_lane	2	DF_128	0	0.0741007	0.454317	0	0.0345324	0.00395683	0	0.244964	0.180935
179	10	2013	december	spring	1	18_12_2013	wild	small_reptiles	Reptile	Squamata	Dipsadidae	Sibynomorphus_mikanii	Jararaquinha_dormideira	150	IBGE	shoulder	2	08:50:00	194335	8234978	23L	sirgass_2000	08:50:00	1	removed	1	0	17	26.2	17.9	21.18	82.25	2000	two_lane	2	DF_001	0	0.106911	0.463643	0	0.0349172	0.012959	0.062995	0.286897	0.0158387
180	10	2013	december	spring	1	18_12_2013	wild	small_birds	Birds	Passeriformes	Furnariidae	Anumbius_annumbi	Cochicho	49	IBGE	shoulder	2	09:00:00	190415	8232324	23L	sirgass_2000	09:00:00	1	removed	1	0	17	26.2	17.9	21.18	82.25	2000	two_lane	2	BR_251	0	0.0519713	0.620789	0	0.0419355	0.0526882	0.00286738	0.221505	0
181	10	2013	december	spring	1	18_12_2013	wild	Large_reptiles	Reptile	Squamata	Viperidae	Crotalus_durissus	Cascavel	550	IBGE	lane	1	09:04:00	190392	8232313	23L	sirgass_2000	09:04:00	1	removed	1	0	17	26.2	17.9	21.18	82.25	2000	two_lane	2	BR_251	0	0.0524802	0.623293	0	0.0420561	0.0521208	0.00287563	0.218907	0
182	10	2013	december	spring	1	18_12_2013	wild	small_reptiles	Reptile	Squamata	Amphisbaenidae	AmphisbaeNA_alba	Cobra_de_duas_cabeças	25	IBGE	lane	1	09:08:00	190228	8232249	23L	sirgass_2000	09:08:00	1	removed	1	0	17	26.2	17.9	21.18	82.25	2000	two_lane	2	BR_251	0	0.0502152	0.647418	0	0.0412482	0.0473458	0.00251076	0.203013	0
183	10	2013	december	spring	1	18_12_2013	wild	small_birds	Birds	Passeriformes	Emberizidae	Volatinia_jacariNA	Tiziu	10	IBGE	lane	1	09:12:00	188904	8231727	23L	sirgass_2000	09:12:00	1	removed	1	0	17	26.2	17.9	21.18	82.25	2000	two_lane	2	BR_251	0	0.0537249	0.814112	0	0.0268625	0.0114613	0	0.0856017	0
184	10	2013	december	spring	1	18_12_2013	wild	small_birds	Birds	Passeriformes	Emberizidae	Volatinia_jacariNA	Tiziu	10	IBGE	lane	1	09:23:00	184730	8230721	23L	sirgass_2000	09:23:00	1	removed	1	0	17	26.2	17.9	21.18	82.25	2000	two_lane	2	BR_251	0.000718907	0.0222861	0.791876	0	0.0977714	0.019051	0.000359454	0.0456506	0
185	10	2013	december	spring	1	18_12_2013	wild	small_birds	Birds	Passeriformes	Emberizidae	Ammodramus_humeralis	tico_tico_do_campo	15	IBGE	shoulder	2	09:26:00	184284	8230869	23L	sirgass_2000	09:26:00	1	removed	1	0	17	26.2	17.9	21.18	82.25	2000	two_lane	2	BR_251	0.000718907	0.0258807	0.754134	0	0.107117	0.0240834	0.00934579	0.0542775	0
186	10	2013	december	spring	1	18_12_2013	wild	large_birds	Birds	Strigiforme	Strigidae	Athene_cunicularia	Coruja_buraqueira	200	IBGE	shoulder	2	09:34:00	182001	8231594	23L	sirgass_2000	09:32:00	24	removed	1	1	17	26.2	17.9	21.18	82.25	2000	two_lane	2	BR_251	0.000718391	0.0233477	0.655891	0	0.118894	0.0678879	0.0323276	0.0563937	0
187	10	2013	december	spring	1	18_12_2013	wild	small_reptiles	Reptile	Squamata	Amphisbaenidae	AmphisbaeNA_alba	Cobra_de_duas_cabeças	25	IBGE	lane	1	09:39:00	180971	8231549	23L	sirgass_2000	09:39:00	1	removed	1	0	17	26.2	17.9	21.18	82.25	2000	two_lane	2	BR_251	0.000716589	0.0290219	0.556431	0	0.105697	0.140093	0.0598352	0.0562522	0
188	10	2013	december	spring	1	18_12_2013	wild	small_birds	Birds	Passeriformes	Emberizidae	Zonotrichia_capensis	Tico_tico	16	PNB	shoulder	2	10:40:00	173135	8256570	23L	sirgass_2000	10:40:00	1	removed	1	0	17	26.2	17.9	21.18	82.25	8000	two_lane	2	DF_001	0	0.0276779	0.410137	0.173976	0.0690151	0.162114	0	0.146657	0
189	10	2013	december	spring	1	18_12_2013	wild	small_birds	Birds	Cuculiforme	Cuculidae	Crotophaga_ani	Anu_preto	100	PNB	shoulder	2	11:00:00	168821	8263487	23L	sirgass_2000	11:00:00	1	removed	1	0	17	26.2	17.9	21.18	82.25	775	two_lane	2	DF_001	0	0.0966583	0.372619	0	0.038807	0.100611	0	0.278836	0.094143
190	10	2013	december	spring	1	18_12_2013	domestic	medium_mammals	Mammals	Carnivora	Felidae	Felis_catus	Gato_Domestico	5000	PNB	shoulder	2	11:38:00	178821	8274662	23L	sirgass_2000	09:43:00	48	removed	1	2	17	26.2	17.9	21.18	82.25	775	two_lane	2	DF_001	0	0.0780014	0.392164	0	0.0664989	0.0492451	0	0.387491	0.0150971
191	10	2013	december	spring	1	18_12_2013	domestic	medium_mammals	Mammals	Carnivora	Felidae	Felis_catus	Gato_Domestico	5000	PNB	shoulder	2	11:48:00	180199	8273614	23L	sirgass_2000	09:40:00	48	removed	1	2	17	26.2	17.9	21.18	82.25	775	two_lane	2	DF_001	0	0.054258	0.490119	0	0.0610852	0.0736615	0	0.311894	0
192	10	2013	december	spring	1	18_12_2013	wild	small_birds	Birds	Passeriformes	Emberizidae	Volatinia_jacariNA	Tiziu	10	PNB	shoulder	2	12:37:00	186121	8269189	23L	sirgass_2000	09:21:00	48	removed	1	2	17	26.2	17.9	21.18	82.25	775	two_lane	2	DF_001	0.000359195	0.014727	0.460129	0	0.060704	0.0502874	0	0.334052	0.0711207
193	10	2013	december	spring	1	18_12_2013	wild	small_birds	Birds	Passeriformes	Emberizidae	Volatinia_jacariNA	Tiziu	10	PNB	shoulder	2	12:49:00	189902	8266408	23L	sirgass_2000	12:49:00	1	removed	1	0	17	26.2	17.9	21.18	82.25	775	two_lane	2	DF_001	0.000718649	0.0632411	0.657564	0	0.0481495	0.166367	0.0215595	0.0301833	0.00395257
194	10	2013	december	spring	1	18_12_2013	wild	small_birds	Birds	Passeriformes	Emberizidae	Volatinia_jacariNA	Tiziu	10	PNB	shoulder	2	12:56:00	192907	8263947	23L	sirgass_2000	12:56:00	1	removed	1	0	17	26.2	17.9	21.18	82.25	775	two_lane	2	DF_001	0.000361795	0.185601	0.325977	0	0.0434153	0.149059	0.181983	0.0549928	0.0238784
195	10	2013	december	spring	1	18_12_2013	wild	large_birds	Birds	Strigiforme	Strigidae	Athene_cunicularia	Coruja_buraqueira	200	ESECAE	shoulder	2	13:45:00	223408	8274973	23L	sirgass_2000	13:23:00	24	removed	1	1	17	26.2	17.9	21.18	82.25	5000	four_lane	3	BR_010_BR_020_BR_030	0	0.0143472	0.447991	0.00430416	0.0053802	0.00035868	0	0.495337	0
196	10	2013	december	spring	1	18_12_2013	wild	Large_reptiles	Reptile	Squamata	Viperidae	Crotalus_durissus	cascavel	550	ESECAE	shoulder	2	14:00:00	219535	8273785	23L	sirgass_2000	10:20:00	48	removed	1	2	17	26.2	17.9	21.18	82.25	5000	four_lane	3	BR_010_BR_020_BR_030	0	0.0400288	0.62784	0	0.0274071	0.00036062	0.0375045	0.245582	0
197	10	2013	december	spring	1	18_12_2013	wild	small_mammals	Mammals	Chiroptera	NA	NA	Morcego	20	ESECAE	shoulder	2	14:10:00	218186	8273872	23L	sirgass_2000	10:37:00	48	removed	1	2	17	26.2	17.9	21.18	82.25	5000	four_lane	3	BR_010_BR_020_BR_030	0	0.0705036	0.581295	0	0.0395683	0	0.146763	0.123022	0.0172662
198	10	2013	december	spring	1	18_12_2013	wild	small_mammals	Mammals	Chiroptera	Phyllostomidae	NA	Morcego	20	ESECAE	lane	1	14:13:00	218091	8273878	23L	sirgass_2000	10:38:00	48	removed	1	2	17	26.2	17.9	21.18	82.25	5000	four_lane	3	BR_010_BR_020_BR_030	0	0.0726096	0.578361	0	0.0406183	0	0.154565	0.115025	0.0172538
199	10	2013	december	spring	1	18_12_2013	wild	small_birds	Birds	Passeriformes	Emberizidae	Volatinia_jacariNA	Tiziu	10	ESECAE	shoulder	2	14:31:00	212725	8275385	23L	sirgass_2000	14:06:00	24	removed	1	1	17	26.2	17.9	21.18	82.25	2600	two_lane	2	DF_128	0.0582106	0.301473	0.212361	0	0.0707869	0.00646784	0.0711462	0.140855	0.11175
200	10	2013	december	spring	1	18_12_2013	wild	small_birds	Birds	Passeriformes	Emberizidae	Volatinia_jacariNA	Tiziu	10	ESECAE	lane	1	14:41:00	216713	8279496	23L	sirgass_2000	14:41:00	1	removed	1	0	17	26.2	17.9	21.18	82.25	2600	two_lane	2	DF_128	0	0.0818966	0.479526	0	0.0337644	0.027658	0	0.278736	0.0818966
201	10	2013	december	spring	1	18_12_2013	wild	small_birds	Birds	Passeriformes	Turdidae	Turdus_leucomelas	sabia	100	ESECAE	shoulder	2	14:50:00	218407	8281235	23L	sirgass_2000	14:50:00	1	removed	1	0	17	26.2	17.9	21.18	82.25	2600	two_lane	2	DF_128	0	0.11167	0.443447	0	0.0621185	0.0201077	0	0.337882	0.00754039
202	11	2014	january	summer	2	06_01_2014	wild	Large_reptiles	Reptile	Testudines	Chelidae	Phrynops_geoffroanus	Cagado_de_barbicha	2000	ESECAE	lane	1	08:07:00	219321	8273725	23L	sirgass_2000	08:07:00	1	removed	1	0	0	28.7	19.1	22.64	62.5	5000	four_lane	3	BR_010_BR_020_BR_030	0	0.0476703	0.612903	0	0.0286738	0.000358423	0.0562724	0.232975	0
203	11	2014	january	summer	2	06_01_2014	wild	small_birds	Birds	Caprimulgiforme	Caprimulgidae	Hidropsalis_albicollis	Bacurau	45	ESECAE	shoulder	2	08:21:00	223254	8274919	23L	sirgass_2000	08:25:00	48	removed	1	2	0	28.7	19.1	22.64	62.5	5000	four_lane	3	BR_010_BR_020_BR_030	0	0.0136641	0.456311	0.00467458	0.00539374	0.00143833	0	0.486516	0
204	11	2014	january	summer	2	06_01_2014	wild	small_birds	Birds	Passeriformes	NA	NA	Passeriforme	25	ESECAE	shoulder	2	08:43:00	212562	8274668	23L	sirgass_2000	08:43:00	1	removed	1	0	0	28.7	19.1	22.64	62.5	2600	two_lane	2	DF_128	0.0583363	0.313648	0.175729	0	0.0900252	0.00648181	0.134318	0.121714	0.0694995
205	11	2014	january	summer	2	06_01_2014	wild	large_birds	Birds	Strigiforme	Tytonidae	Tyto_alba	Suindara	500	ESECAE	shoulder	2	08:49:00	214308	8277016	23L	sirgass_2000	08:05:00	96	remained	0	4	0	28.7	19.1	22.64	62.5	2600	two_lane	2	DF_128	0.0114654	0.132927	0.39914	0	0.0415622	0.00214977	0	0.166965	0.227875
206	11	2014	january	summer	2	06_01_2014	wild	Large_mammals	Mammals	Carnivora	Canidae	Cerdocyon_thous	Cachorro_do_mato	5700	ESECAE	shoulder	2	08:55:00	215940	8278692	23L	sirgass_2000	08:11:00	96	remained	0	4	0	28.7	19.1	22.64	62.5	2600	two_lane	2	DF_128	0	0.070321	0.475298	0	0.038947	0.0108186	0	0.25027	0.146772
207	11	2014	january	summer	2	06_01_2014	wild	large_birds	Birds	Strigiforme	Strigidae	Athene_cunicularia	Coruja_buraqueira	200	ESECAE	shoulder	2	08:58:00	216213	8278974	23L	sirgass_2000	08:15:00	96	remained	0	4	0	28.7	19.1	22.64	62.5	2600	two_lane	2	DF_128	0	0.0734504	0.478681	0	0.0379792	0.0118237	0	0.255464	0.130777
208	11	2014	january	summer	2	06_01_2014	domestic	Large_mammals	Mammals	Carnivora	Canidae	Canis_familiaris	Cachorro_Domestico	10000	ESECAE	lane	1	09:51:00	213414	8273907	23L	sirgass_2000	07:57:00	96	remained	0	4	0	28.7	19.1	22.64	62.5	5000	four_lane	3	BR_010_BR_020_BR_030	0.0344828	0.252155	0.190374	0	0.0804598	0.00862069	0.249282	0.106681	0.0445402
209	11	2014	january	summer	2	06_01_2014	domestic	Large_mammals	Mammals	Carnivora	Canidae	Canis_familiaris	Cachorro_Domestico	10000	PNB	shoulder	2	10:24:00	186951	8268587	23L	sirgass_2000	10:24:00	1	removed	1	0	0	28.7	19.1	22.64	62.5	775	two_lane	2	DF_001	0.00036062	0.0219978	0.513163	0	0.0602236	0.0407501	0	0.274793	0.0800577
210	11	2014	january	summer	2	06_01_2014	wild	large_birds	Birds	Tinamiforme	TiNAmidae	Rhynchotus_rufescens	Perdiz	300	PNB	shoulder	2	10:27:00	186215	8269128	23L	sirgass_2000	10:27:00	1	removed	1	0	0	28.7	19.1	22.64	62.5	775	two_lane	2	DF_001	0.000358166	0.015043	0.467765	0	0.0601719	0.0494269	0	0.326289	0.0723496
211	11	2014	january	summer	2	06_01_2014	wild	small_birds	Birds	Passeriformes	Emberizidae	Volatinia_jacariNA	Tiziu	10	PNB	lane	1	10:38:00	183868	8270854	23L	sirgass_2000	10:38:00	1	removed	1	0	0	28.7	19.1	22.64	62.5	775	two_lane	2	DF_001	0	0.00502152	0.42396	0	0.0964849	0.0889527	0	0.376973	0
212	11	2014	january	summer	2	06_01_2014	wild	small_birds	Birds	Passeriformes	Emberizidae	Volatinia_jacariNA	Tiziu	10	PNB	lane	1	10:50:00	178556	8274867	23L	sirgass_2000	11:00:00	48	removed	1	2	0	28.7	19.1	22.64	62.5	775	two_lane	2	DF_001	0	0.074901	0.362982	0	0.0633777	0.046453	0	0.412315	0.0288081
213	11	2014	january	summer	2	06_01_2014	wild	small_birds	Birds	Passeriformes	NA	NA	Passeriforme	25	PNB	lane	1	10:52:00	178348	8275027	23L	sirgass_2000	11:02:00	72	removed	1	3	0	28.7	19.1	22.64	62.5	775	two_lane	2	DF_001	0	0.0694995	0.339215	0	0.0601368	0.0457328	0	0.432121	0.0417717
214	11	2014	january	summer	2	06_01_2014	wild	small_birds	Birds	Passeriformes	NA	NA	Passeriforme	25	PNB	lane	1	10:55:00	177938	8275333	23L	sirgass_2000	10:55:00	1	removed	1	0	0	28.7	19.1	22.64	62.5	775	two_lane	2	DF_001	0	0.0570506	0.302835	0	0.0548977	0.0670972	0	0.443488	0.0631503
215	11	2014	january	summer	2	06_01_2014	wild	small_reptiles	Reptile	Squamata	Dipsadidae	Philodryas_patagoniensis	Cobra_cipo	150	PNB	lane	1	11:11:00	170420	8269931	23L	sirgass_2000	09:36:00	96	remained	0	4	0	28.7	19.1	22.64	62.5	775	dirt_road	1	DF_001	0	0.0483871	0.205376	0	0.0376344	0.214337	0	0.397491	0.0856631
216	11	2014	january	summer	2	06_01_2014	domestic	Large_mammals	Mammals	Carnivora	Canidae	Canis_familiaris	Cachorro_Domestico	10000	PNB	lane	1	11:26:00	168879	8262708	23L	sirgass_2000	09:50:00	96	remained	0	4	0	28.7	19.1	22.64	62.5	775	two_lane	2	DF_001	0	0.0997479	0.404033	0	0.0457328	0.0839035	0	0.274757	0.074901
217	11	2014	january	summer	2	06_01_2014	wild	small_birds	Birds	Passeriformes	Emberizidae	Volatinia_jacariNA	Tiziu	10	PNB	lane	1	11:32:00	169157	8259443	23L	sirgass_2000	11:32:00	24	removed	1	1	0	28.7	19.1	22.64	62.5	775	two_lane	2	DF_001	0	0.0535971	0.25036	0.157194	0.0683453	0.116187	0	0.281295	0.0557554
218	11	2014	january	summer	2	06_01_2014	domestic	Large_mammals	Mammals	Carnivora	Canidae	Canis_familiaris	Cachorro_Domestico	10000	PNB	lane	1	11:34:00	169190	8259191	23L	sirgass_2000	09:56:00	96	remained	0	4	0	28.7	19.1	22.64	62.5	775	two_lane	2	DF_001	0	0.0435252	0.23741	0.193885	0.068705	0.114388	0	0.269784	0.0557554
219	11	2014	january	summer	2	06_01_2014	wild	small_birds	Birds	Passeriformes	Emberizidae	Volatinia_jacariNA	Tiziu	10	IBGE	shoulder	2	13:09:00	193109	8233876	23L	sirgass_2000	13:09:00	1	removed	1	0	0	28.7	19.1	22.64	62.5	2000	two_lane	2	BR_251	0	0.0902902	0.379792	0	0.0555357	0.0641347	0.00573271	0.375851	0.015765
220	11	2014	january	summer	2	06_01_2014	wild	small_birds	Birds	Passeriformes	NA	NA	Passeriforme	25	JBB	lane	1	13:22:00	197704	8238728	23L	sirgass_2000	13:50:00	48	removed	1	2	0	28.7	19.1	22.64	62.5	7000	four_lane	3	DF_001	0	0.0891834	0.627149	0	0.0737822	0.0182665	0.0196991	0.150788	0
221	11	2014	january	summer	2	07_01_2014	domestic	Large_mammals	Mammals	Carnivora	Canidae	Canis_familiaris	Cachorro_Domestico	10000	ESECAE	shoulder	2	08:23:00	219015	8273798	23L	sirgass_2000	07:54:00	72	removed	1	3	0	28.9	17.4	23.28	53.25	5000	four_lane	3	BR_010_BR_020_BR_030	0	0.0574919	0.617319	0	0.0298239	0	0.0790514	0.194754	0
222	11	2014	january	summer	2	07_01_2014	wild	small_birds	Birds	Passeriformes	NA	NA	Passeriforme	25	ESECAE	shoulder	2	08:35:00	213004	8273882	23L	sirgass_2000	08:00:00	72	removed	1	3	0	28.9	17.4	23.28	53.25	2600	two_lane	2	DF_128	0.0523297	0.264158	0.170609	0	0.0827957	0.00860215	0.214337	0.108244	0.065233
223	11	2014	january	summer	2	07_01_2014	wild	small_reptiles	Reptile	Squamata	Dipsadidae	Oxyrhopus_guibei	Coral_falsa	80	ESECAE	lane	1	09:15:00	227964	8282589	23L	sirgass_2000	09:37:00	48	removed	1	2	0	28.9	17.4	23.28	53.25	33	dirt_road	1	DF_205	0	0.0254925	0.2472	0	0.0189262	0.00038625	0	0.658555	0
224	11	2014	january	summer	2	07_01_2014	wild	small_birds	Birds	Passeriformes	Emberizidae	Volatinia_jacariNA	Tiziu	10	PNB	shoulder	2	10:14:00	186104	8269213	23L	sirgass_2000	10:14:00	1	removed	1	0	0	28.9	17.4	23.28	53.25	775	two_lane	2	DF_001	0.00035868	0.0147059	0.45911	0	0.0609756	0.0509326	0	0.33429	0.0710187
225	11	2014	january	summer	2	07_01_2014	wild	small_birds	Birds	Passeriformes	Emberizidae	Volatinia_jacariNA	Tiziu	10	PNB	lane	1	10:33:00	180135	8273670	23L	sirgass_2000	10:33:00	1	removed	1	0	0	28.9	17.4	23.28	53.25	775	two_lane	2	DF_001	0	0.053918	0.490295	0	0.0582315	0.0733285	0	0.315241	0
226	11	2014	january	summer	2	07_01_2014	wild	small_birds	Birds	Passeriformes	NA	NA	Passeriforme	25	PNB	lane	1	10:41:00	179223	8274365	23L	sirgass_2000	10:57:00	48	removed	1	2	0	28.9	17.4	23.28	53.25	775	two_lane	2	DF_001	0	0.0734077	0.437208	0	0.0644117	0.0546959	0	0.358762	0.00143937
227	11	2014	january	summer	2	07_01_2014	wild	small_birds	Birds	Passeriformes	Emberizidae	Volatinia_jacariNA	Tiziu	10	IBGE	lane	1	13:18:00	193023	8233795	23L	sirgass_2000	13:33:00	48	removed	1	2	0	28.9	17.4	23.28	53.25	2000	two_lane	2	BR_251	0	0.0880661	0.380302	0	0.0557153	0.0650611	0.00395399	0.378864	0.015816
228	11	2014	january	summer	2	07_01_2014	wild	large_birds	Birds	Strigiforme	Strigidae	Athene_cunicularia	Coruja_buraqueira	200	JBB	lane	1	13:42:00	196856	8237103	23L	sirgass_2000	10:56:00	72	removed	1	3	0	28.9	17.4	23.28	53.25	7000	four_lane	3	DF_001	0	0.0951351	0.58955	0	0.0486486	0.0158559	0.0781982	0.150631	0
229	11	2014	january	summer	2	08_01_2014	wild	small_birds	Birds	Passeriformes	Emberizidae	Volatinia_jacariNA	Tiziu	10	ESECAE	lane	1	08:19:00	223539	8274976	23L	sirgass_2000	07:47:00	48	removed	1	2	0	28.3	16.8	23.1	45.5	5000	four_lane	3	BR_010_BR_020_BR_030	0	0.0151406	0.433309	0.00396539	0.00540735	0.00036049	0	0.50721	0
230	11	2014	january	summer	2	08_01_2014	wild	small_birds	Birds	Caprimulgiforme	Caprimulgidae	Hidropsalis_albicollis	Bacurau	45	ESECAE	shoulder	2	08:28:00	223093	8274870	23L	sirgass_2000	08:28:00	1	removed	1	0	0	28.3	16.8	23.1	45.5	5000	four_lane	3	BR_010_BR_020_BR_030	0	0.0151188	0.466163	0.00467963	0.00539957	0.00143988	0	0.475162	0
231	11	2014	january	summer	2	08_01_2014	wild	small_birds	Birds	Passeriformes	Turdidae	Turdus_rufiventris	Sabia_Laranjeira	74	ESECAE	shoulder	2	08:34:00	220954	8274204	23L	sirgass_2000	08:34:00	1	removed	1	0	0	28.3	16.8	23.1	45.5	5000	four_lane	3	BR_010_BR_020_BR_030	0	0.0201875	0.582913	0	0.0237924	0.00144196	0	0.347513	0
232	11	2014	january	summer	2	08_01_2014	wild	small_birds	Birds	Passeriformes	Emberizidae	Volatinia_jacariNA	Tiziu	10	ESECAE	lane	1	08:57:00	212638	8275268	23L	sirgass_2000	08:02:00	48	removed	1	2	0	28.3	16.8	23.1	45.5	2600	two_lane	2	DF_128	0.0581688	0.305206	0.202154	0	0.0786355	0.0064632	0.0768402	0.140754	0.104129
233	11	2014	january	summer	2	08_01_2014	wild	small_birds	Birds	Passeriformes	Emberizidae	Volatinia_jacariNA	Tiziu	10	ESECAE	lane	1	09:07:00	215350	8278087	23L	sirgass_2000	09:10:00	24	removed	1	1	0	28.3	16.8	23.1	45.5	2600	two_lane	2	DF_128	0	0.07354	0.461067	0	0.0252343	0.00576784	0	0.251262	0.175919
234	11	2014	january	summer	2	08_01_2014	wild	large_birds	Birds	Tinamiforme	TiNAmidae	Rhynchotus_rufescens	Perdiz	300	PNB	shoulder	2	11:48:00	169253	8258960	23L	sirgass_2000	11:42:00	24	removed	1	1	0	28.3	16.8	23.1	45.5	775	two_lane	2	DF_001	0	0.0377426	0.225018	0.228613	0.069734	0.116104	0	0.251618	0.0557153
235	12	2014	february	summer	2	03_02_2014	wild	small_birds	Birds	Cuculiforme	Cuculidae	Crotophaga_ani	Anu_preto	100	ESECAE	shoulder	2	08:20:00	215572	8273993	23L	sirgass_2000	08:20:00	1	removed	1	0	0	28.2	19.2	23.56	50	5000	four_lane	3	BR_010_BR_020_BR_030	0	0.140952	0.443764	0	0.0717376	0.00432588	0.25739	0.0313627	0.0234319
236	12	2014	february	summer	2	03_02_2014	wild	small_mammals	Mammals	Rodentia	Cricetidae	Calomys_tener	Rato_silvestre	12	ESECAE	shoulder	2	08:45:00	223945	8275103	23L	sirgass_2000	08:28:00	96	remained	0	4	0	28.2	19.2	23.56	50	5000	four_lane	3	BR_010_BR_020_BR_030	0	0.0168883	0.412864	0.00503054	0.00538987	0.000718649	0	0.521739	0
237	12	2014	february	summer	2	03_02_2014	domestic	Large_mammals	Mammals	Carnivora	Canidae	Canis_familiaris	Cachorro_Domestico	10000	ESECAE	shoulder	2	08:48:00	224020	8275164	23L	sirgass_2000	08:40:00	96	remained	0	4	0	28.2	19.2	23.56	50	5000	four_lane	3	BR_010_BR_020_BR_030	0	0.0176132	0.411934	0.00611071	0.0053918	0.000718907	0	0.520129	0
238	12	2014	february	summer	2	03_02_2014	wild	small_birds	Birds	Passeriformes	NA	NA	Passeriforme	25	ESECAE	lane	1	08:52:00	223625	8275039	23L	sirgass_2000	08:27:00	24	removed	1	1	0	28.2	19.2	23.56	50	5000	four_lane	3	BR_010_BR_020_BR_030	0	0.0151079	0.435252	0.00251799	0.00539568	0.000359712	0	0.505755	0
239	12	2014	february	summer	2	03_02_2014	domestic	Large_mammals	Mammals	Carnivora	Canidae	Canis_familiaris	Cachorro_Domestico	10000	ESECAE	shoulder	2	09:05:00	217726	8273910	23L	sirgass_2000	08:44:00	96	remained	0	4	0	28.2	19.2	23.56	50	5000	four_lane	3	BR_010_BR_020_BR_030	0	0.0812073	0.561624	0	0.0445562	0	0.185771	0.0876752	0.0172476
240	12	2014	february	summer	2	03_02_2014	wild	large_birds	Birds	Strigiforme	Strigidae	Athene_cunicularia	Coruja_buraqueira	200	ESECAE	shoulder	2	09:25:00	216355	8279121	23L	sirgass_2000	09:01:00	24	removed	1	1	0	28.2	19.2	23.56	50	2600	two_lane	2	DF_128	0	0.0755396	0.478777	0	0.0370504	0.0154676	0	0.260072	0.119424
241	12	2014	february	summer	2	03_02_2014	wild	small_reptiles	Reptile	Squamata	Dipsadidae	Sibynomorphus_mikanii	Jararaquinha_dormideira	150	ESECAE	shoulder	2	09:26:00	216355	8279121	23L	sirgass_2000	09:01:00	24	removed	1	1	0	28.2	19.2	23.56	50	2600	two_lane	2	DF_128	0	0.0755396	0.478777	0	0.0370504	0.0154676	0	0.260072	0.119424
242	12	2014	february	summer	2	03_02_2014	wild	small_birds	Birds	Passeriformes	Emberizidae	Volatinia_jacariNA	Tiziu	10	PNB	lane	1	10:34:00	192893	8263973	23L	sirgass_2000	10:26:00	24	removed	1	1	0	28.2	19.2	23.56	50	775	two_lane	2	DF_001	0.000359583	0.184106	0.329378	0	0.0431499	0.148867	0.181949	0.0546566	0.0237325
243	12	2014	february	summer	2	03_02_2014	wild	small_birds	Birds	Passeriformes	Emberizidae	Volatinia_jacariNA	Tiziu	10	PNB	lane	1	10:50:00	186155	8269173	23L	sirgass_2000	10:41:00	24	removed	1	1	0	28.2	19.2	23.56	50	775	two_lane	2	DF_001	0.000360231	0.0147695	0.462896	0	0.0605187	0.0497118	0	0.331412	0.0713256
244	12	2014	february	summer	2	03_02_2014	wild	small_birds	Birds	Passeriformes	NA	NA	Passeriforme	25	PNB	lane	1	10:53:00	185510	8269649	23L	sirgass_2000	10:53:00	1	removed	1	0	0	28.2	19.2	23.56	50	775	two_lane	2	DF_001	0	0.00868307	0.4233	0	0.0709117	0.065123	0	0.371925	0.051013
245	12	2014	february	summer	2	03_02_2014	wild	small_birds	Birds	Passeriformes	NA	NA	Passeriforme	25	PNB	lane	1	11:10:00	182273	8272045	23L	sirgass_2000	11:10:00	1	removed	1	0	0	28.2	19.2	23.56	50	775	two_lane	2	DF_001	0	0.0305097	0.44939	0	0.113424	0.0743001	0	0.323403	0
246	12	2014	february	summer	2	03_02_2014	wild	small_birds	Birds	Passeriformes	Emberizidae	Volatinia_jacariNA	Tiziu	10	PNB	lane	1	11:47:00	168762	8264214	23L	sirgass_2000	11:47:00	1	removed	1	0	0	28.2	19.2	23.56	50	775	two_lane	2	DF_001	0	0.0867218	0.336812	0	0.0313062	0.11263	0	0.288233	0.124145
247	12	2014	february	summer	2	03_02_2014	wild	small_birds	Birds	Passeriformes	Emberizidae	Volatinia_jacariNA	Tiziu	10	PNB	lane	1	11:53:00	168834	8263209	23L	sirgass_2000	11:37:00	48	removed	1	2	0	28.2	19.2	23.56	50	775	two_lane	2	DF_001	0	0.0972272	0.380627	0	0.0424919	0.0943464	0	0.28412	0.0831833
248	12	2014	february	summer	2	03_02_2014	wild	small_birds	Birds	Passeriformes	Emberizidae	Volatinia_jacariNA	Tiziu	10	PNB	lane	1	11:53:00	168835	8263203	23L	sirgass_2000	11:37:00	48	removed	1	2	0	28.2	19.2	23.56	50	775	two_lane	2	DF_001	0	0.0972272	0.381707	0	0.0424919	0.0939863	0	0.28412	0.0824631
249	12	2014	february	summer	2	03_02_2014	wild	small_birds	Birds	Passeriformes	Emberizidae	Volatinia_jacariNA	Tiziu	10	PNB	lane	1	12:05:00	170061	8258097	23L	sirgass_2000	09:56:00	96	remained	0	4	0	28.2	19.2	23.56	50	775	two_lane	2	DF_001	0	0.0252343	0.233958	0.30858	0.0836337	0.175919	0	0.122206	0.037491
250	12	2014	february	summer	2	03_02_2014	wild	small_birds	Birds	Passeriformes	NA	NA	Passeriforme	25	PNB	shoulder	2	12:06:00	170067	8258093	23L	sirgass_2000	12:06:00	1	removed	1	0	0	28.2	19.2	23.56	50	775	two_lane	2	DF_001	0	0.0252343	0.23504	0.309301	0.0836337	0.175919	0	0.120764	0.0371305
251	12	2014	february	summer	2	03_02_2014	wild	small_birds	Birds	Passeriformes	Emberizidae	Volatinia_jacariNA	Tiziu	10	IBGE	lane	1	13:52:00	192704	8233511	23L	sirgass_2000	13:52:00	1	removed	1	0	0	28.2	19.2	23.56	50	2000	two_lane	2	BR_251	0	0.0746322	0.365985	0	0.0692501	0.0714029	0.00358809	0.386796	0.0157876
252	12	2014	february	summer	2	04_02_2014	domestic	medium_mammals	Mammals	Carnivora	Felidae	Felis_catus	Gato_Domestico	5000	ESECAE	lane	1	08:07:00	214733	8274114	23L	sirgass_2000	07:55:00	24	removed	1	1	0	27.8	17.8	22.48	52.5	5000	four_lane	3	BR_010_BR_020_BR_030	0	0.190785	0.352412	0	0.0698344	0.00863931	0.243701	0.0709143	0.0316775
253	12	2014	february	summer	2	04_02_2014	domestic	medium_mammals	Mammals	Carnivora	Felidae	Felis_catus	Gato_Domestico	5000	ESECAE	shoulder	2	08:50:00	213569	8276255	23L	sirgass_2000	08:56:00	72	removed	1	3	0	27.8	17.8	22.48	52.5	2600	two_lane	2	DF_128	0.0491215	0.22266	0.312657	0	0.0423091	0.000717103	0.00501972	0.150592	0.191466
254	12	2014	february	summer	2	04_02_2014	wild	large_birds	Birds	Strigiforme	Strigidae	Athene_cunicularia	Coruja_buraqueira	200	ESECAE	shoulder	2	09:00:00	216069	8278826	23L	sirgass_2000	09:00:00	1	removed	1	0	0	27.8	17.8	22.48	52.5	2600	two_lane	2	DF_128	0	0.0731268	0.475865	0	0.0381844	0.0115274	0	0.252522	0.139409
255	12	2014	february	summer	2	04_02_2014	wild	small_birds	Birds	Passeriformes	Emberizidae	Volatinia_jacariNA	Tiziu	10	ESECAE	lane	1	09:07:00	218315	8281134	23L	sirgass_2000	09:07:00	1	removed	1	0	0	27.8	17.8	22.48	52.5	2600	two_lane	2	DF_128	0	0.110473	0.447274	0	0.0570301	0.0200861	0	0.340746	0.00753228
256	12	2014	february	summer	2	04_02_2014	domestic	medium_mammals	Mammals	Carnivora	Felidae	Felis_catus	Gato_Domestico	5000	ESECAE	lane	1	09:38:00	226916	8279495	23L	sirgass_2000	09:34:00	24	removed	1	1	0	27.8	17.8	22.48	52.5	951	two_lane	2	BR_010_DF_345	0	0.0190374	0.45546	0	0.0362787	0.029454	0	0.437859	0
257	12	2014	february	summer	2	04_02_2014	wild	small_birds	Birds	Passeriformes	Emberizidae	Volatinia_jacariNA	Tiziu	10	PNB	lane	1	10:40:00	186226	8269120	23L	sirgass_2000	10:40:00	1	removed	1	0	0	27.8	17.8	22.48	52.5	775	two_lane	2	DF_001	0.000359066	0.0150808	0.468582	0	0.0603232	0.048833	0	0.325673	0.0725314
258	12	2014	february	summer	2	04_02_2014	wild	small_birds	Birds	Passeriformes	Emberizidae	Volatinia_jacariNA	Tiziu	10	PNB	lane	1	10:45:00	184882	8270110	23L	sirgass_2000	10:43:00	24	removed	1	1	0	27.8	17.8	22.48	52.5	775	two_lane	2	DF_001	0	0.00648181	0.419157	0	0.0907454	0.0694995	0	0.383147	0.0219662
259	12	2014	february	summer	2	04_02_2014	wild	small_birds	Birds	Passeriformes	Emberizidae	Volatinia_jacariNA	Tiziu	10	PNB	shoulder	2	11:43:00	169028	8260975	23L	sirgass_2000	11:43:00	1	removed	1	0	0	27.8	17.8	22.48	52.5	775	two_lane	2	DF_001	0	0.077642	0.320633	0.00215672	0.0711718	0.134076	0	0.320992	0.0571531
260	12	2014	february	summer	2	05_02_2014	wild	small_birds	Birds	Passeriformes	NA	NA	Passeriforme	25	ESECAE	shoulder	2	08:04:00	219406	8273723	23L	sirgass_2000	08:04:00	24	removed	1	1	0	30	18	23.96	53.25	5000	four_lane	3	BR_010_BR_020_BR_030	0	0.0444126	0.614613	0	0.027937	0.000358166	0.0505014	0.240688	0
261	12	2014	february	summer	2	05_02_2014	wild	small_birds	Birds	Passeriformes	NA	NA	Passeriforme	25	ESECAE	lane	1	08:04:00	219416	8273722	23L	sirgass_2000	08:04:00	1	removed	1	0	0	30	18	23.96	53.25	5000	four_lane	3	BR_010_BR_020_BR_030	0	0.0448189	0.615633	0	0.027967	0.000358551	0.0484044	0.241664	0
262	12	2014	february	summer	2	05_02_2014	wild	small_birds	Birds	Passeriformes	Emberizidae	Volatinia_jacariNA	Tiziu	10	ESECAE	lane	1	08:44:00	212592	8274586	23L	sirgass_2000	08:50:00	48	removed	1	2	0	30	18	23.96	53.25	2600	two_lane	2	DF_128	0.0582106	0.309378	0.17571	0	0.0909091	0.00646784	0.14373	0.117499	0.0679123
263	12	2014	february	summer	2	05_02_2014	wild	small_birds	Birds	Cuculiforme	Cuculidae	Crotophaga_ani	Anu_preto	100	ESECAE	shoulder	2	08:46:00	212549	8274716	23L	sirgass_2000	08:51:00	48	removed	1	2	0	30	18	23.96	53.25	2600	two_lane	2	DF_128	0.0584205	0.316625	0.175983	0	0.0894338	0.00649116	0.128741	0.123332	0.0710422
264	12	2014	february	summer	2	05_02_2014	wild	small_birds	Birds	Passeriformes	NA	NA	Passeriforme	25	ESECAE	lane	1	09:29:00	227837	8280741	23L	sirgass_2000	08:34:00	48	removed	1	2	0	30	18	23.96	53.25	951	two_lane	2	BR_010_DF_345	0	0.027947	0.324257	0	0.0232891	0.0293802	0	0.561806	0
265	12	2014	february	summer	2	05_02_2014	wild	small_birds	Birds	Passeriformes	Emberizidae	Volatinia_jacariNA	Tiziu	10	ESECAE	lane	1	09:29:00	227837	8280741	23L	sirgass_2000	08:34:00	48	removed	1	2	0	30	18	23.96	53.25	951	two_lane	2	BR_010_DF_345	0	0.027947	0.324257	0	0.0232891	0.0293802	0	0.561806	0
266	12	2014	february	summer	2	05_02_2014	wild	small_reptiles	Reptile	Squamata	Amphisbaenidae	AmphisbaeNA_alba	Cobra_de_duas_cabeças	25	ESECAE	lane	1	09:45:00	224120	8275559	23L	sirgass_2000	09:34:00	24	removed	1	1	0	30	18	23.96	53.25	951	two_lane	2	BR_010_DF_345	0	0.0140338	0.45484	0.0043181	0.00539763	0.000719683	0	0.482908	0
267	12	2014	february	summer	2	05_02_2014	wild	small_birds	Birds	Passeriformes	Emberizidae	Volatinia_jacariNA	Tiziu	10	PNB	lane	1	10:24:00	191908	8264817	23L	sirgass_2000	10:24:00	1	removed	1	0	0	30	18	23.96	53.25	775	two_lane	2	DF_001	0.0010745	0.110315	0.402579	0	0.0433381	0.189112	0.141834	0.0623209	0.023639
268	12	2014	february	summer	2	05_02_2014	wild	small_birds	Birds	Passeriformes	Emberizidae	Volatinia_jacariNA	Tiziu	10	PNB	lane	1	10:29:00	191049	8265553	23L	sirgass_2000	10:29:00	1	removed	1	0	0	30	18	23.96	53.25	775	two_lane	2	DF_001	0.000717103	0.0752958	0.522409	0	0.0462531	0.225529	0.0552169	0.0609537	0.00358551
269	12	2014	february	summer	2	05_02_2014	wild	small_birds	Birds	Apodiforme	Trochilidae	NA	Beija_flor	8	PNB	lane	1	10:54:00	182783	8271656	23L	sirgass_2000	09:31:00	48	removed	1	2	0	30	18	23.96	53.25	775	two_lane	2	DF_001	0	0.0100322	0.446793	0	0.111788	0.0763167	0	0.346113	0
270	12	2014	february	summer	2	05_02_2014	wild	small_birds	Birds	Passeriformes	Emberizidae	Volatinia_jacariNA	Tiziu	10	PNB	lane	1	10:57:00	182131	8272154	23L	sirgass_2000	09:33:00	48	removed	1	2	0	30	18	23.96	53.25	775	two_lane	2	DF_001	0	0.0369043	0.44751	0	0.115013	0.0752418	0	0.316374	0
271	12	2014	february	summer	2	05_02_2014	wild	small_birds	Birds	Passeriformes	NA	NA	Passeriforme	25	FAL	shoulder	2	14:37:00	188663	8231627	23L	sirgass_2000	14:37:00	1	removed	1	0	0	30	18	23.96	53.25	2000	two_lane	2	BR_251	0	0.0508108	0.84	0	0.0234234	0.0108108	0	0.067027	0
272	12	2014	february	summer	2	05_02_2014	wild	small_birds	Birds	Passeriformes	Emberizidae	Volatinia_jacariNA	Tiziu	10	IBGE	lane	1	14:49:00	193670	8234377	23L	sirgass_2000	13:47:00	24	removed	1	1	0	30	18	23.96	53.25	2000	two_lane	2	BR_251	0	0.0997839	0.414265	0	0.0457493	0.0461095	0.0284582	0.335735	0.0158501
273	12	2014	february	summer	2	05_02_2014	wild	small_birds	Birds	Passeriformes	Emberizidae	Volatinia_jacariNA	Tiziu	10	IBGE	lane	1	14:52:00	193998	8234611	23L	sirgass_2000	13:48:00	24	removed	1	1	0	30	18	23.96	53.25	2000	two_lane	2	BR_251	0	0.102085	0.434939	0	0.038821	0.0273185	0.0463695	0.319554	0.015816
274	12	2014	february	summer	2	05_02_2014	wild	small_birds	Birds	Passeriformes	Emberizidae	Volatinia_jacariNA	Tiziu	10	JBB	shoulder	2	15:26:00	197425	8238193	23L	sirgass_2000	15:06:00	1	removed	1	0	0	30	18	23.96	53.25	7000	four_lane	3	DF_001	0	0.096299	0.630974	0	0.0700683	0.0194035	0.0168883	0.144808	0
275	12	2014	february	summer	2	05_02_2014	wild	small_birds	Birds	Passeriformes	NA	NA	Passeriforme	25	JBB	shoulder	2	15:28:00	197505	8238342	23L	sirgass_2000	15:08:00	1	removed	1	0	0	30	18	23.96	53.25	7000	four_lane	3	DF_001	0	0.0933333	0.633153	0	0.070991	0.0194595	0.0140541	0.147748	0
276	12	2014	february	summer	2	05_02_2014	wild	small_birds	Birds	Passeriformes	Emberizidae	Volatinia_jacariNA	Tiziu	10	JBB	shoulder	2	15:11:00	197880	8239089	23L	sirgass_2000	15:11:00	1	removed	1	0	0	30	18	23.96	53.25	7000	four_lane	3	DF_001	0	0.0887446	0.610029	0	0.0743146	0.0205628	0.0281385	0.156926	0
277	13	2014	march	summer	2	10_03_2014	wild	small_birds	Birds	Passeriformes	Emberizidae	Volatinia_jacariNA	Tiziu	10	ESECAE	shoulder	2	07:59:00	222300	8274591	23L	sirgass_2000	00:00:00	1	removed	1	0	73.7	27.5	16.3	22.02	73.5	5000	four_lane	3	BR_010_BR_020_BR_030	0	0.0154343	0.507897	0.00502513	0.0129218	0.00179469	0	0.425341	0
278	13	2014	march	summer	2	10_03_2014	wild	large_birds	Birds	Psittaciformes	Psittacidae	Amazona_sp.	Papagaio	400	ESECAE	shoulder	2	08:08:00	223251	8274919	23L	sirgass_2000	08:23:00	72	removed	1	3	73.7	27.5	16.3	22.02	73.5	5000	four_lane	3	BR_010_BR_020_BR_030	0	0.0137135	0.457236	0.00469145	0.00541321	0.00144352	0	0.485384	0
279	13	2014	march	summer	2	10_03_2014	wild	small_birds	Birds	Passeriformes	Emberizidae	Volatinia_jacariNA	Tiziu	10	ESECAE	shoulder	2	08:41:00	215076	8277800	23L	sirgass_2000	08:41:00	1	removed	1	0	73.7	27.5	16.3	22.02	73.5	2600	two_lane	2	DF_128	0	0.0740474	0.457225	0	0.034867	0.00395399	0	0.241553	0.181165
280	13	2014	march	summer	2	10_03_2014	wild	small_birds	Birds	Passeriformes	Emberizidae	Volatinia_jacariNA	Tiziu	10	ESECAE	shoulder	2	09:21:00	224874	8276723	23L	sirgass_2000	09:21:00	1	removed	1	0	73.7	27.5	16.3	22.02	73.5	951	two_lane	2	BR_010_DF_345	0	0.0158616	0.503965	0.00252343	0.018385	0.00684932	0	0.414203	0
281	13	2014	march	summer	2	10_03_2014	wild	small_birds	Birds	Passeriformes	Emberizidae	Volatinia_jacariNA	Tiziu	10	PNB	shoulder	2	10:00:00	187122	8268461	23L	sirgass_2000	10:00:00	1	removed	1	0	73.7	27.5	16.3	22.02	73.5	775	two_lane	2	DF_001	0.000359712	0.028777	0.520504	0	0.0604317	0.0410072	0	0.259712	0.0805755
282	13	2014	march	summer	2	10_03_2014	wild	small_birds	Birds	Passeriformes	Emberizidae	Volatinia_jacariNA	Tiziu	10	PNB	shoulder	2	10:22:00	180630	8273293	23L	sirgass_2000	10:22:00	1	removed	1	0	73.7	27.5	16.3	22.02	73.5	775	two_lane	2	DF_001	0	0.0528967	0.482908	0	0.0741274	0.0784455	0	0.302267	0
283	13	2014	march	summer	2	10_03_2014	wild	Large_reptiles	Reptile	Squamata	Boidae	Boa_constrictor	jiboia	4000	PNB	shoulder	2	10:59:00	169054	8260628	23L	sirgass_2000	09:40:00	96	remained	0	4	73.7	27.5	16.3	22.02	73.5	775	two_lane	2	DF_001	0	0.0745409	0.301044	0.024847	0.0694995	0.132877	0	0.32265	0.057256
284	13	2014	march	summer	2	10_03_2014	wild	large_birds	Birds	Tinamiforme	TiNAmidae	Rhynchotus_rufescens	Perdiz	300	PNB	shoulder	2	11:05:00	169545	8258476	23L	sirgass_2000	11:41:00	24	removed	1	1	73.7	27.5	16.3	22.02	73.5	775	two_lane	2	DF_001	0	0.0262779	0.215623	0.281857	0.0763139	0.140029	0	0.190785	0.0557955
285	13	2014	march	summer	2	10_03_2014	wild	small_reptiles	Reptile	Squamata	Dipsadidae	Oxyrhopus_sp	Coral_falsa	80	PNB	lane	1	11:13:00	172700	8257111	23L	sirgass_2000	11:13:00	1	removed	1	0	73.7	27.5	16.3	22.02	73.5	8000	two_lane	2	DF_001	0	0.0229968	0.437298	0.180022	0.0812073	0.19152	0	0.0765361	0
286	13	2014	march	summer	2	10_03_2014	wild	small_birds	Birds	Passeriformes	Emberizidae	Volatinia_jacariNA	Tiziu	10	PNB	lane	1	11:18:00	173278	8256233	23L	sirgass_2000	11:49:00	24	removed	1	1	73.7	27.5	16.3	22.02	73.5	8000	two_lane	2	DF_001	0	0.0326868	0.384698	0.172414	0.0653736	0.14727	0	0.186422	0
287	13	2014	march	summer	2	10_03_2014	domestic	medium_mammals	Mammals	Carnivora	Felidae	Felis_catus	Gato_Domestico	5000	FAL	shoulder	2	13:02:00	188765	8231662	23L	sirgass_2000	10:39:00	96	remained	0	4	73.7	27.5	16.3	22.02	73.5	2000	two_lane	2	BR_251	0	0.0517799	0.829917	0	0.0244516	0.0118662	0	0.0740741	0
288	13	2014	march	summer	2	10_03_2014	wild	small_birds	Birds	Passeriformes	Emberizidae	Volatinia_jacariNA	Tiziu	10	JBB	shoulder	2	13:22:00	197767	8238835	23L	sirgass_2000	13:22:00	1	removed	1	0	73.7	27.5	16.3	22.02	73.5	7000	four_lane	3	DF_001	0	0.0894718	0.62235	0	0.0754581	0.0190442	0.0186849	0.153791	0
289	13	2014	march	summer	2	10_03_2014	wild	small_birds	Birds	Passeriformes	Emberizidae	Volatinia_jacariNA	Tiziu	10	JBB	shoulder	2	13:24:00	197867	8239046	23L	sirgass_2000	13:24:00	1	removed	1	0	73.7	27.5	16.3	22.02	73.5	7000	four_lane	3	DF_001	0	0.0886894	0.611131	0	0.0750449	0.0201077	0.0265709	0.156912	0
290	13	2014	march	summer	2	11_03_2014	wild	small_reptiles	Reptile	Squamata	Amphisbaenidae	AmphisbaeNA_alba	Cobra_de_duas_cabeças	25	ESECAE	shoulder	2	08:20:00	217786	8273869	23L	sirgass_2000	07:46:00	24	removed	1	1	0	27.2	17.5	21.92	71	5000	four_lane	3	BR_010_BR_020_BR_030	0	0.0801582	0.558591	0	0.0442128	0	0.182602	0.0956147	0.0172538
291	13	2014	march	summer	2	11_03_2014	wild	small_birds	Birds	Passeriformes	Emberizidae	Volatinia_jacariNA	Tiziu	10	ESECAE	lane	1	08:31:00	223644	8275011	23L	sirgass_2000	08:00:00	24	removed	1	1	0	27.2	17.5	21.92	71	5000	four_lane	3	BR_010_BR_020_BR_030	0	0.0155067	0.429859	0.00288496	0.0054093	0.00036062	0	0.509917	0
292	13	2014	march	summer	2	11_03_2014	wild	small_reptiles	Reptile	Squamata	Dipsadidae	Oxyrhopus_guibei	Coral_falsa	80	ESECAE	shoulder	2	08:41:00	221517	8274378	23L	sirgass_2000	08:41:00	1	removed	1	0	0	27.2	17.5	21.92	71	5000	four_lane	3	BR_010_BR_020_BR_030	0	0.0182796	0.554122	0.00286738	0.0204301	0.00143369	0	0.372401	0
293	13	2014	march	summer	2	11_03_2014	domestic	Large_mammals	Mammals	Carnivora	Canidae	Canis_familiaris	Cachorro_Domestico	10000	ESECAE	shoulder	2	08:58:00	214062	8274106	23L	sirgass_2000	08:38:00	48	removed	1	2	0	27.2	17.5	21.92	71	5000	four_lane	3	BR_010_BR_020_BR_030	0.00972973	0.238559	0.253694	0	0.0745946	0.00864865	0.247928	0.0976577	0.0363964
294	13	2014	march	summer	2	11_03_2014	wild	Large_reptiles	Reptile	Squamata	Viperidae	Bothrops_sp.	Cascavel	550	ESECAE	shoulder	2	09:19:00	216401	8279167	23L	sirgass_2000	08:59:00	48	removed	1	2	0	27.2	17.5	21.92	71	2600	two_lane	2	DF_128	0	0.075872	0.480043	0	0.0366775	0.0165408	0	0.262136	0.115067
295	13	2014	march	summer	2	11_03_2014	wild	large_birds	Birds	Strigiforme	Strigidae	Athene_cunicularia	Coruja_buraqueira	200	PNB	lane	1	10:49:00	182850	8271603	23L	sirgass_2000	10:16:00	24	removed	1	1	0	27.2	17.5	21.92	71	775	two_lane	2	DF_001	0	0.00755668	0.442605	0	0.111551	0.0788053	0	0.350486	0
296	13	2014	march	summer	2	11_03_2014	domestic	Large_mammals	Mammals	Carnivora	Canidae	Canis_familiaris	Cachorro_Domestico	10000	PNB	lane	1	11:38:00	169198	8259158	23L	sirgass_2000	11:38:00	1	removed	1	0	0	27.2	17.5	21.92	71	775	two_lane	2	DF_001	0	0.0432121	0.234786	0.198776	0.0680591	0.114872	0	0.268635	0.0558156
297	13	2014	march	summer	2	12_03_2014	wild	small_reptiles	Reptile	Squamata	Amphisbaenidae	AmphisbaeNA_alba	Cobra_de_duas_cabeças	25	ESECAE	lane	1	07:50:00	218586	8273795	23L	sirgass_2000	00:00:00	48	removed	1	2	11	27.6	17.8	22.8	62.5	5000	four_lane	3	BR_010_BR_020_BR_030	0	0.0644348	0.593233	0	0.0345572	0	0.116271	0.160187	0.00971922
298	13	2014	march	summer	2	12_03_2014	wild	medium_mammals	Mammals	Carnivora	Mustelidae	Galictis_cuja	Furao	1600	ESECAE	lane	1	08:33:00	212532	8274845	23L	sirgass_2000	08:39:00	48	removed	1	2	11	27.6	17.8	22.8	62.5	2600	two_lane	2	DF_128	0.0580437	0.314583	0.179147	0	0.0881405	0.0064493	0.114654	0.130419	0.0788248
299	13	2014	march	summer	2	12_03_2014	wild	small_birds	Birds	Passeriformes	Emberizidae	Volatinia_jacariNA	Tiziu	10	PNB	lane	1	10:56:00	169085	8260306	23L	sirgass_2000	10:56:00	1	removed	1	0	11	27.6	17.8	22.8	62.5	775	two_lane	2	DF_001	0	0.0716859	0.291427	0.0525937	0.0634006	0.128602	0	0.317003	0.0572767
300	13	2014	march	summer	2	12_03_2014	wild	small_reptiles	Reptile	Squamata	Amphisbaenidae	AmphisbaeNA_alba	Cobra_de_duas_cabeças	25	PNB	lane	1	11:08:00	170464	8257872	23L	sirgass_2000	11:08:00	1	removed	1	0	11	27.6	17.8	22.8	62.5	8000	two_lane	2	DF_001	0	0.0226864	0.258192	0.316529	0.0842636	0.200576	0	0.0817429	0.0241268
301	13	2014	march	summer	2	12_03_2014	wild	small_birds	Birds	Passeriformes	Emberizidae	Volatinia_jacariNA	Tiziu	10	IBGE	shoulder	2	13:00:00	193034	8233798	23L	sirgass_2000	10:44:00	48	removed	1	2	11	27.6	17.8	22.8	62.5	2000	two_lane	2	BR_251	0	0.0882883	0.379099	0	0.0554955	0.0655856	0.00432432	0.379099	0.0158559
302	14	2014	april	autumn	3	07_04_2014	wild	small_birds	Birds	NA	NA	NA	Ave_silvestre	NA	IBGE	lane	1	08:25:00	193309	8234061	23L	sirgass_2000	08:38:00	48	removed	1	2	0	29.3	18	22.88	75.5	2000	two_lane	2	BR_251	0	0.0964595	0.388367	0	0.0531069	0.0578035	0.0122832	0.362355	0.015896
303	14	2014	april	autumn	3	07_04_2014	wild	large_birds	Birds	Strigiforme	Strigidae	Athene_cunicularia	Coruja_buraqueira	200	FAL	shoulder	2	08:30:00	190462	8232344	23L	sirgass_2000	08:25:00	96	remained	0	4	0	29.3	18	22.88	75.5	2000	two_lane	2	BR_251	0	0.0528587	0.614887	0	0.0420712	0.0546566	0.00287666	0.22438	0
304	14	2014	april	autumn	3	07_04_2014	wild	small_mammals	Mammals	Didelphimorphia	Didelphidae	Didelphis_albiventris	Gamba_ou_Sarue_	900	FAL	shoulder	2	08:45:00	183429	8231165	23L	sirgass_2000	08:45:00	1	removed	1	0	0	29.3	18	22.88	75.5	2000	two_lane	2	BR_251	0.000718907	0.0194105	0.73652	0	0.11826	0.030913	0.0111431	0.0564342	0
305	14	2014	april	autumn	3	07_04_2014	wild	small_mammals	Mammals	Didelphimorphia	Didelphidae	Didelphis_albiventris	Gamba_ou_Sarue_	900	PNB	lane	1	09:27:00	173050	8252203	23L	sirgass_2000	09:18:00	96	remained	0	4	0	29.3	18	22.88	75.5	8000	two_lane	2	DF_001	0	0.132062	0.0957179	0.168406	0.0309464	0.0806045	0.314861	0.13566	0.0086362
306	14	2014	april	autumn	3	07_04_2014	domestic	medium_mammals	Mammals	Carnivora	Felidae	Felis_catus	Gato_Domestico	5000	PNB	lane	1	09:45:00	168929	8262241	23L	sirgass_2000	09:51:00	24	removed	1	1	0	29.3	18	22.88	75.5	775	two_lane	2	DF_001	0	0.0948276	0.393319	0	0.0474138	0.103089	0	0.271193	0.0732759
307	14	2014	april	autumn	3	07_04_2014	wild	small_reptiles	Reptile	Squamata	Dipsadidae	Oxyrhopus_sp	Coral_falsa	80	PNB	shoulder	2	10:25:00	183336	8271236	23L	sirgass_2000	10:37:00	48	removed	1	2	0	29.3	18	22.88	75.5	775	two_lane	2	DF_001	0	0.0053802	0.435796	0	0.0950502	0.0914634	0	0.363343	0
308	14	2014	april	autumn	3	07_04_2014	domestic	medium_mammals	Mammals	Carnivora	Felidae	Felis_catus	Gato_Domestico	5000	PNB	lane	1	10:45:00	184485	8270388	23L	sirgass_2000	10:47:00	48	removed	1	2	0	29.3	18	22.88	75.5	775	two_lane	2	DF_001	0	0.00683945	0.417927	0	0.0935925	0.0795536	0	0.386969	0.00611951
309	14	2014	april	autumn	3	07_04_2014	domestic	Large_mammals	Mammals	Carnivora	Canidae	Canis_familiaris	Cachorro_Domestico	10000	PNB	lane	1	10:47:00	184609	8270297	23L	sirgass_2000	09:48:00	96	remained	0	4	0	29.3	18	22.88	75.5	775	two_lane	2	DF_001	0	0.00681981	0.41565	0	0.0947595	0.0768126	0	0.386576	0.0107681
310	14	2014	april	autumn	3	07_04_2014	wild	small_birds	Birds	Passeriformes	Emberizidae	Volatinia_jacariNA	Tiziu	10	PNB	shoulder	2	10:52:00	186309	8269052	23L	sirgass_2000	10:51:00	48	removed	1	2	0	29.3	18	22.88	75.5	775	two_lane	2	DF_001	0.000361795	0.0162808	0.473951	0	0.0604197	0.0455861	0	0.320188	0.0741679
311	14	2014	april	autumn	3	07_04_2014	domestic	Large_mammals	Mammals	Carnivora	Canidae	Canis_familiaris	Cachorro_Domestico	10000	ESECAE	shoulder	2	11:45:00	222790	8274774	23L	sirgass_2000	11:37:00	48	removed	1	2	0	29.3	18	22.88	75.5	5000	four_lane	3	BR_010_BR_020_BR_030	0	0.0136641	0.478964	0.00503416	0.00827041	0.00143833	0	0.460626	0
312	14	2014	april	autumn	3	07_04_2014	wild	small_birds	Birds	Caprimulgiforme	Caprimulgidae	Hidropsalis_albicollis	Bacurau	45	ESECAE	lane	1	11:50:00	220542	8274074	23L	sirgass_2000	11:50:00	1	removed	1	0	0	29.3	18	22.88	75.5	5000	four_lane	3	BR_010_BR_020_BR_030	0	0.0212307	0.615689	0	0.0255488	0.00143937	0.000719683	0.313422	0
313	14	2014	april	autumn	3	07_04_2014	wild	small_reptiles	Reptile	Squamata	Amphisbaenidae	AmphisbaeNA_alba	Cobra_de_duas_cabeças	25	ESECAE	shoulder	2	11:56:00	218047	8273880	23L	sirgass_2000	11:37:00	24	removed	1	1	0	29.3	18	22.88	75.5	5000	four_lane	3	BR_010_BR_020_BR_030	0	0.0734341	0.575954	0	0.0413967	0	0.159827	0.110511	0.0172786
314	14	2014	april	autumn	3	07_04_2014	wild	small_birds	Birds	Passeriformes	NA	NA	Passeriforme	25	ESECAE	shoulder	2	12:06:00	213951	8274082	23L	sirgass_2000	10:20:00	96	remained	0	4	0	29.3	18	22.88	75.5	5000	four_lane	3	BR_010_BR_020_BR_030	0.0133189	0.24406	0.236501	0	0.074514	0.00863931	0.25306	0.100072	0.037077
315	14	2014	april	autumn	3	07_04_2014	wild	small_reptiles	Reptile	Squamata	Amphisbaenidae	AmphisbaeNA_alba	Cobra_de_duas_cabeças	25	ESECAE	lane	1	12:16:00	214738	8277452	23L	sirgass_2000	12:16:00	1	removed	1	0	0	29.3	18	22.88	75.5	2600	two_lane	2	DF_128	0	0.088467	0.43947	0	0.0419054	0.002149	0	0.209527	0.206304
316	14	2014	april	autumn	3	07_04_2014	wild	small_reptiles	Reptile	Squamata	Amphisbaenidae	AmphisbaeNA_alba	Cobra_de_duas_cabeças	25	ESECAE	shoulder	2	12:18:00	215142	8277868	23L	sirgass_2000	12:18:00	1	removed	1	0	0	29.3	18	22.88	75.5	2600	two_lane	2	DF_128	0	0.0729167	0.457256	0	0.0334052	0.00395115	0	0.244612	0.180675
317	14	2014	april	autumn	3	07_04_2014	wild	small_reptiles	Reptile	Squamata	Amphisbaenidae	AmphisbaeNA_alba	Cobra_de_duas_cabeças	25	ESECAE	shoulder	2	12:20:00	215463	8278197	23L	sirgass_2000	12:20:00	1	removed	1	0	0	29.3	18	22.88	75.5	2600	two_lane	2	DF_128	0	0.074261	0.464672	0	0.0273973	0.00684932	0	0.247657	0.171954
318	14	2014	april	autumn	3	07_04_2014	wild	large_birds	Birds	Strigiforme	Strigidae	Athene_cunicularia	Coruja_buraqueira	200	ESECAE	shoulder	2	12:22:00	216068	8278820	23L	sirgass_2000	10:26:00	96	remained	0	4	0	29.3	18	22.88	75.5	2600	two_lane	2	DF_128	0	0.0710422	0.477822	0	0.0378651	0.0115398	0	0.252795	0.13956
319	14	2014	april	autumn	3	07_04_2014	wild	Large_reptiles	Reptile	Squamata	Dipsadidae	Pseudoboa_nigra	Cobra_Preta	180	ESECAE	shoulder	2	12:36:00	220836	8282025	23L	sirgass_2000	12:09:00	24	removed	1	1	0	29.3	18	22.88	75.5	33	dirt_road	1	DF_205	0.0029017	0.136743	0.539354	0	0.0319188	0.0188611	0	0.225608	0.00943054
320	14	2014	april	autumn	3	08_04_2014	wild	small_birds	Birds	Passeriformes	NA	NA	Passeriforme	25	IBGE	lane	1	08:19:00	195829	8236317	23L	sirgass_2000	08:19:00	1	removed	1	0	5.8	28	19	22.06	79.5	2000	two_lane	2	DF_001	0	0.092739	0.571891	0	0.0161754	0.0125809	0.107117	0.161395	0.015816
321	14	2014	april	autumn	3	08_04_2014	wild	small_birds	Birds	Passeriformes	Emberizidae	Zonotrichia_capensis	Tico_tico	16	PNB	lane	1	09:45:00	169263	8258957	23L	sirgass_2000	09:45:00	1	removed	1	0	5.8	28	19	22.06	79.5	775	two_lane	2	DF_001	0	0.0377155	0.225216	0.228807	0.0700431	0.116739	0	0.250359	0.0556753
322	14	2014	april	autumn	3	09_04_2014	wild	small_birds	Birds	Passeriformes	Emberizidae	Zonotrichia_capensis	Tico_tico	16	IBGE	shoulder	2	08:30:00	195555	8236070	23L	sirgass_2000	08:30:00	1	removed	1	0	0	28.6	19	21.98	77	2000	two_lane	2	DF_001	0	0.0932661	0.554555	0	0.014404	0.0104429	0.10623	0.182931	0.0158444
323	14	2014	april	autumn	3	09_04_2014	domestic	Large_mammals	Mammals	Carnivora	Canidae	Canis_familiaris	Cachorro_Domestico	10000	PNB	lane	1	10:30:00	179921	8273821	23L	sirgass_2000	10:28:00	24	removed	1	1	0	28.6	19	21.98	77	775	two_lane	2	DF_001	0	0.0559943	0.492462	0	0.0563532	0.0660445	0	0.319813	0
324	14	2014	april	autumn	3	09_04_2014	wild	Large_reptiles	Reptile	Squamata	Dipsadidae	Pseudoboa_nigra	BoiruNA_maculata	180	ESECAE	shoulder	2	12:00:00	215795	8278534	23L	sirgass_2000	11:50:00	24	removed	1	1	0	28.6	19	21.98	77	2600	two_lane	2	DF_128	0	0.072688	0.473552	0	0.0370637	0.00899604	0	0.246132	0.154372
325	14	2014	april	autumn	3	09_04_2014	wild	small_birds	Birds	Passeriformes	NA	NA	Passeriforme	25	ESECAE	shoulder	2	12:30:00	227271	8279971	23L	sirgass_2000	12:30:00	1	removed	1	0	0	28.6	19	21.98	77	951	two_lane	2	BR_010_DF_345	0	0.0237239	0.416607	0	0.0345075	0.0294752	0	0.467649	0
326	14	2014	april	autumn	3	09_04_2014	domestic	Large_mammals	Mammals	Carnivora	Canidae	Canis_familiaris	Cachorro_Domestico	10000	ESECAE	shoulder	2	12:41:00	223849	8275105	23L	sirgass_2000	10:15:00	48	removed	1	2	0	28.6	19	21.98	77	5000	four_lane	3	BR_010_BR_020_BR_030	0	0.0169126	0.422454	0.00287873	0.00539763	0.000719683	0	0.514574	0
327	15	2014	may	autumn	3	12_05_2014	domestic	medium_mammals	Mammals	Carnivora	Felidae	Felis_catus	Gato_Domestico	5000	ESECAE	shoulder	2	09:13:00	213561	8276244	23L	sirgass_2000	08:41:00	24	removed	1	1	0	24.2	15.7	19.3	67.5	2600	two_lane	2	DF_128	0.0492629	0.222941	0.311758	0	0.0424308	0.000719166	0.00539374	0.151025	0.190939
328	15	2014	may	autumn	3	12_05_2014	wild	small_birds	Birds	Passeriformes	NA	NA	Passeriforme	25	ESECAE	lane	1	09:15:00	213834	8276519	23L	sirgass_2000	09:15:00	1	removed	1	0	0	24.2	15.7	19.3	67.5	2600	two_lane	2	DF_128	0.0368098	0.190906	0.345002	0	0.0407795	0.00216528	0	0.153735	0.206424
329	15	2014	may	autumn	3	12_05_2014	wild	small_birds	Birds	Cuculiforme	Cuculidae	Guira_guira	Anu_branco	100	ESECAE	shoulder	2	08:23:00	216150	8278857	23L	sirgass_2000	08:23:00	96	remained	0	4	0	24.2	15.7	19.3	67.5	2600	two_lane	2	DF_128	0	0.0706853	0.485468	0	0.0376749	0.0118407	0	0.249372	0.134553
330	15	2014	may	autumn	3	12_05_2014	wild	small_reptiles	Reptile	Squamata	Dipsadidae	Oxyrhopus_sp	Coral_falsa	80	ESECAE	shoulder	2	09:28:00	218036	8280846	23L	sirgass_2000	09:28:00	1	removed	1	0	0	24.2	15.7	19.3	67.5	2600	two_lane	2	DF_128	0	0.105697	0.459692	0	0.0455034	0.0204228	0	0.348979	0.00286636
331	15	2014	may	autumn	3	12_05_2014	domestic	large_birds	Ave	Galliforme	Phasianidae	Gallus_gallus_domesticus	Galinha	1500	ESECAE	shoulder	2	09:35:00	219819	8281750	23L	sirgass_2000	08:34:00	96	remained	0	4	0	24.2	15.7	19.3	67.5	33	dirt_road	1	DF_205	0.00252252	0.117477	0.523964	0	0.0504505	0.0227027	0	0.244324	0.0118919
332	15	2014	may	autumn	3	12_05_2014	domestic	medium_mammals	Mammals	Carnivora	Felidae	Felis_catus	Gato_Domestico	5000	PNB	shoulder	2	11:12:00	174531	8272954	23L	sirgass_2000	09:20:00	96	remained	0	4	0	24.2	15.7	19.3	67.5	775	dirt_road	1	DF_001	0	0.0687925	0.390541	0	0.0795414	0.287352	0	0.0609101	0.104264
333	15	2014	may	autumn	3	12_05_2014	domestic	Large_mammals	Mammals	Carnivora	Canidae	Canis_familiaris	Cachorro_Domestico	10000	PNB	shoulder	2	11:37:00	169109	8260048	23L	sirgass_2000	11:37:00	1	removed	1	0	0	24.2	15.7	19.3	67.5	775	two_lane	2	DF_001	0	0.0694645	0.281838	0.0824891	0.0629522	0.12301	0	0.304993	0.0571635
334	15	2014	may	autumn	3	12_05_2014	wild	medium_mammals	Mammals	Carnivora	Mephitidae	Conepatus_semistriatus	Jaritataca	3400	IBGE	shoulder	2	12:50:00	191439	8232712	23L	sirgass_2000	09:43:00	96	remained	0	4	0	24.2	15.7	19.3	67.5	2000	two_lane	2	BR_251	0	0.0557955	0.456443	0	0.0593952	0.0741541	0.00359971	0.341613	0
335	15	2014	may	autumn	3	12_05_2014	wild	small_mammals	Mammals	Didelphimorphia	Didelphidae	Didelphis_albiventris	Gamba_ou_Sarue_	900	JBB	shoulder	2	13:09:00	197970	8241100	23L	sirgass_2000	09:53:00	96	remained	0	4	0	24.2	15.7	19.3	67.5	7000	four_lane	3	DF_001	0.000359712	0.103597	0.410432	0	0.119424	0.0528777	0.139209	0.151799	0
336	15	2014	may	autumn	3	13_05_2014	wild	small_birds	Birds	Passeriformes	NA	NA	Passeriforme	25	ESECAE	lane	1	08:36:00	212737	8274328	23L	sirgass_2000	08:36:00	1	removed	1	0	0	24.6	15.2	18.96	61.5	2600	two_lane	2	DF_128	0.0583573	0.284222	0.175793	0	0.0954611	0.00684438	0.17183	0.106988	0.0680836
337	15	2014	may	autumn	3	13_05_2014	wild	small_birds	Birds	Passeriformes	Emberizidae	Volatinia_jacariNA	Tiziu	10	PNB	lane	1	10:10:00	178776	8274700	23L	sirgass_2000	10:10:00	1	removed	1	0	0	24.6	15.2	18.96	61.5	775	two_lane	2	DF_001	0	0.0783609	0.386053	0	0.0664989	0.0488857	0	0.392523	0.0161754
338	15	2014	may	autumn	3	13_05_2014	wild	large_birds	Birds	Strigiforme	Strigidae	Athene_cunicularia	Coruja_buraqueira	200	FAL	lane	1	11:36:00	190948	8232521	23L	sirgass_2000	11:36:00	1	removed	1	0	0	24.6	15.2	18.96	61.5	2000	two_lane	2	BR_251	0	0.0584416	0.535714	0	0.046176	0.0689033	0.002886	0.27886	0
339	15	2014	may	autumn	3	14_05_2014	wild	small_reptiles	Reptile	Squamata	Dipsadidae	Oxyrhopus_sp	Coral_falsa	80	ESECAE	shoulder	2	08:54:00	214218	8274131	23L	sirgass_2000	08:11:00	48	removed	1	2	0	25.2	13.2	19.16	52.75	5000	four_lane	3	BR_010_BR_020_BR_030	0.00573271	0.227517	0.276962	0	0.0720172	0.00859907	0.247223	0.0938732	0.0358295
340	15	2014	may	autumn	3	14_05_2014	wild	small_reptiles	Reptile	Squamata	Dipsadidae	Oxyrhopus_guibei	Coral_falsa	80	ESECAE	shoulder	2	09:13:00	215532	8278270	23L	sirgass_2000	09:13:00	1	removed	1	0	0	25.2	13.2	19.16	52.75	2600	two_lane	2	DF_128	0	0.0751258	0.466211	0	0.0287563	0.00718907	0	0.247304	0.168224
341	15	2014	may	autumn	3	14_05_2014	wild	large_birds	Birds	Accipitriformes	Accipitridae	Rupornis_magnirostris	Gaviao_carijo	300	ESECAE	shoulder	2	09:48:00	227740	8280610	23L	sirgass_2000	09:48:00	1	removed	1	0	0	25.2	13.2	19.16	52.75	951	two_lane	2	BR_010_DF_345	0	0.0280677	0.34077	0	0.0266283	0.029507	0	0.540842	0
342	15	2014	may	autumn	3	14_05_2014	wild	small_birds	Birds	Passeriformes	Emberizidae	Volatinia_jacariNA	Tiziu	10	PNB	shoulder	2	10:57:00	178052	8275251	23L	sirgass_2000	10:57:00	1	removed	1	0	0	25.2	13.2	19.16	52.75	775	two_lane	2	DF_001	0	0.0606604	0.312994	0	0.0585068	0.0567121	0	0.443647	0.0563532
343	15	2014	may	autumn	3	14_05_2014	wild	small_birds	Birds	Passeriformes	NA	NA	Passeriforme	25	IBGE	lane	1	13:43:00	193600	8234305	23L	sirgass_2000	00:00:00	1	removed	1	0	0	25.2	13.2	19.16	52.75	2000	two_lane	2	BR_251	0	0.0992806	0.406115	0	0.0489209	0.0489209	0.0255396	0.341007	0.0158273
344	16	2014	june	autumn	3	02_06_2014	wild	small_mammals	Mammals	Didelphimorphia	Didelphidae	Didelphis_albiventris	Gamba_ou_Sarue_	900	JBB	shoulder	2	08:10:00	197958	8241135	23L	sirgass_2000	08:55:00	96	remained	0	4	0	25.2	17.2	19.88	68.75	7000	four_lane	3	DF_001	0.000360231	0.104467	0.40634	0	0.121398	0.0522334	0.14049	0.151297	0
345	16	2014	june	autumn	3	02_06_2014	wild	small_birds	Birds	Passeriformes	Thraupidae	Lanio_pileatus	Tico_tico_rei_cinza	16	JBB	lane	1	08:20:00	196302	8236743	23L	sirgass_2000	08:32:00	1	removed	1	0	0	25.2	17.2	19.88	68.75	2000	two_lane	2	DF_001	0	0.0831234	0.600936	0	0.027348	0.013674	0.0957179	0.147535	0.00791652
346	16	2014	june	autumn	3	02_06_2014	wild	small_reptiles	Reptile	Squamata	Dipsadidae	Philodryas_sp	Cobra_cipo	150	PNB	shoulder	2	09:54:00	168774	8264049	23L	sirgass_2000	10:14:00	1	removed	1	0	0	25.2	17.2	19.88	68.75	775	two_lane	2	DF_001	0	0.0910068	0.344679	0	0.0311716	0.110355	0	0.285919	0.117521
347	16	2014	june	autumn	3	02_06_2014	domestic	medium_mammals	Mammals	Carnivora	Felidae	Felis_catus	Gato_Domestico	5000	PNB	shoulder	2	10:01:00	169231	8266062	23L	sirgass_2000	11:03:00	96	remained	0	4	0	25.2	17.2	19.88	68.75	775	dirt_road	1	DF_001	0	0.0498029	0.30885	0	0.0290219	0.19957	0	0.249015	0.146901
348	16	2014	june	autumn	3	02_06_2014	domestic	Large_mammals	Mammals	Carnivora	Canidae	Canis_familiaris	Cachorro_Domestico	10000	ESECAE	shoulder	2	12:11:00	215258	8277990	23L	sirgass_2000	10:15:00	96	remained	0	4	0	25.2	17.2	19.88	68.75	2600	two_lane	2	DF_128	0	0.0721724	0.459246	0	0.0287253	0.00502693	0	0.249192	0.178456
349	16	2014	june	autumn	3	02_06_2014	wild	small_mammals	Mammals	Didelphimorphia	Didelphidae	Didelphis_albiventris	Gamba_ou_Sarue_	900	ESECAE	shoulder	2	12:17:00	216857	8279631	23L	sirgass_2000	12:39:00	1	removed	1	0	0	25.2	17.2	19.88	68.75	2600	two_lane	2	DF_128	0	0.083964	0.48	0	0.0324324	0.0306306	0	0.291171	0.0655856
350	16	2014	june	autumn	3	03_06_2014	wild	small_reptiles	Reptile	Squamata	Amphisbaenidae	AmphisbaeNA_alba	Cobra_de_duas_cabeças	25	JBB	lane	1	08:10:00	197842	8241458	23L	sirgass_2000	08:00:00	1	removed	1	0	0	25.6	15	19.3	79.25	7000	four_lane	3	DF_001	0.000358809	0.106207	0.369932	0	0.156441	0.0498744	0.14747	0.1446	0
351	16	2014	june	autumn	3	03_06_2014	wild	small_birds	Birds	Passeriformes	Corvidae	Cyanocorax_cristatellus	Gralha	60	JBB	shoulder	2	08:54:00	185874	8230638	23L	sirgass_2000	08:28:00	1	removed	1	0	0	25.6	15	19.3	79.25	2000	two_lane	2	BR_251	0	0.0222701	0.87033	0	0.0747126	0.00933908	0	0.0122126	0
352	16	2014	june	autumn	3	03_06_2014	wild	small_mammals	Mammals	Didelphimorphia	Didelphidae	Didelphis_albiventris	Gamba_ou_Sarue_	900	PNB	shoulder	2	10:06:00	169070	8260602	23L	sirgass_2000	09:28:00	1	removed	1	0	0	25.6	15	19.3	79.25	775	two_lane	2	DF_001	0	0.0736086	0.301616	0.027289	0.0696589	0.135009	0	0.318492	0.0570916
353	16	2014	june	autumn	3	04_06_2014	wild	large_birds	Birds	Strigiforme	Strigidae	Asio_clamator	Coruja_orelhuda	400	PNB	shoulder	2	09:20:00	173725	8254571	23L	sirgass_2000	11:14:00	48	removed	1	2	9.9	26	14.6	19.64	76.25	8000	two_lane	2	DF_001	0	0.0982014	0.238489	0.161151	0.0431655	0.110432	0.0057554	0.32482	0
354	16	2014	june	autumn	3	04_06_2014	wild	large_birds	Birds	Strigiforme	Strigidae	Aegolius_harrisii	Cabure_Acanelado	155	ESECAE	shoulder	2	11:35:00	218346	8273822	23L	sirgass_2000	09:52:00	48	removed	1	2	9.9	26	14.6	19.64	76.25	5000	four_lane	3	BR_010_BR_020_BR_030	0	0.0670754	0.582762	0	0.0367833	0	0.136314	0.138839	0.0165885
355	16	2014	june	autumn	3	04_06_2014	wild	small_birds	Birds	Passeriformes	Furnariidae	Phacellodomus_rufifrons	Joao_de_pau	24	ESECAE	shoulder	2	12:20:00	224838	8276670	23L	sirgass_2000	12:44:00	1	removed	1	0	9.9	26	14.6	19.64	76.25	951	two_lane	2	BR_010_DF_345	0	0.0161464	0.502332	0.00358809	0.0179404	0.00574094	0	0.416218	0
356	17	2014	july	winter	4	21_07_2014	domestic	Large_mammals	Mammals	Carnivora	Canidae	Canis_familiaris	Cachorro_Domestico	10000	ESECAE	lane	1	08:30:00	213479	8276160	23L	sirgass_2000	08:21:00	1	removed	1	0	6.8	26.7	14.3	20.4	51	2600	two_lane	2	DF_128	0.052726	0.232066	0.302009	0	0.0444763	0	0.0107604	0.148135	0.184362
357	17	2014	july	winter	4	22_07_2014	wild	small_birds	Birds	Passeriformes	Emberizidae	Volatinia_jacariNA	Tiziu	10	ESECAE	shoulder	2	07:57:00	221225	8274255	23L	sirgass_2000	07:58:00	1	removed	1	0	0	25.9	15.4	19.76	51.25	5000	four_lane	3	BR_010_BR_020_BR_030	0	0.0175879	0.560302	0.00215363	0.0222541	0.00143575	0	0.36827	0
358	17	2014	july	winter	4	22_07_2014	wild	small_reptiles	Reptile	Squamata	Dipsadidae	Oxyrhopus_sp	Coral_falsa	80	ESECAE	lane	1	08:51:00	228433	8282602	23L	sirgass_2000	08:04:00	72	removed	1	3	0	25.9	15.4	19.76	51.25	33	dirt_road	1	DF_205	0	0.0301974	0.201316	0	0.0181959	0.000387147	0	0.699961	0
359	17	2014	july	winter	4	22_07_2014	wild	medium_mammals	Mammals	Carnivora	Mephitidae	Conepatus_semistriatus	Jaritataca	3400	JBB	shoulder	2	11:53:00	198008	8239473	23L	sirgass_2000	09:16:00	72	removed	1	3	0	25.9	15.4	19.76	51.25	7000	four_lane	3	DF_001	0	0.0857245	0.579986	0	0.0703013	0.0197274	0.0634864	0.16033	0
360	17	2014	july	winter	4	23_07_2014	wild	large_birds	Birds	Strigiforme	Strigidae	NA	Coruja	200	ESECAE	shoulder	2	08:35:00	216147	8278905	23L	sirgass_2000	08:53:00	1	removed	1	0	0	24.8	15	19.2	61.25	2600	two_lane	2	DF_128	0	0.074514	0.477322	0	0.0385169	0.011879	0	0.25198	0.134989
361	17	2014	july	winter	4	23_07_2014	wild	small_mammals	Mammals	Rodentia	Cricetidae	Necromys_lasiurus	Rato_silvestre	40	ESECAE	shoulder	2	08:35:00	216147	8278905	23L	sirgass_2000	08:53:00	1	removed	1	0	0	24.8	15	19.2	61.25	2600	two_lane	2	DF_128	0	0.074514	0.477322	0	0.0385169	0.011879	0	0.25198	0.134989
362	18	2014	august	winter	4	25_08_2014	wild	Large_reptiles	Reptile	Squamata	Dipsadidae	Pseudoboa_nigra	Cobra_Preta	180	JBB	lane	1	08:07:00	198084	8239912	23L	sirgass_2000	08:08:00	24	removed	1	1	0	28.7	14.7	22.16	36.5	7000	four_lane	3	DF_001	0	0.0846542	0.54719	0	0.0554755	0.0313401	0.0958213	0.164265	0
363	18	2014	august	winter	4	25_08_2014	wild	medium_mammals	Mammals	Lagomorpha	Leporidae	Sylvilagus_brasiliensis	Tapiti	1500	FAL	shoulder	2	08:42:00	185883	8230642	23L	sirgass_2000	07:58:00	96	remained	0	4	0	28.7	14.7	22.16	36.5	2000	two_lane	2	BR_251	0	0.0222143	0.870656	0	0.0745253	0.00931566	0	0.012182	0
364	18	2014	august	winter	4	26_08_2014	wild	small_birds	Birds	Passeriformes	Thraupidae	Lanio_pileatus	Tico_tico_rei_cinza	16	JBB	shoulder	2	08:20:00	194766	8235369	23L	sirgass_2000	08:23:00	1	removed	1	0	0	30.8	15.8	24.04	31	2000	two_lane	2	DF_001	0	0.108914	0.492092	0	0.0316319	0.00790798	0.0801582	0.242991	0.015816
365	18	2014	august	winter	4	26_08_2014	wild	small_birds	Birds	Passeriformes	Emberizidae	Volatinia_jacariNA	Tiziu	10	JBB	shoulder	2	08:23:00	194727	8235331	23L	sirgass_2000	08:24:00	1	removed	1	0	0	30.8	15.8	24.04	31	2000	two_lane	2	DF_001	0	0.108993	0.486331	0	0.0330935	0.00899281	0.0798561	0.246763	0.0158273
366	18	2014	august	winter	4	26_08_2014	wild	small_birds	Birds	Passeriformes	Emberizidae	Volatinia_jacariNA	Tiziu	10	JBB	lane	1	08:28:00	194664	8235273	23L	sirgass_2000	08:25:00	1	removed	1	0	0	30.8	15.8	24.04	31	2000	two_lane	2	DF_001	0	0.110871	0.480202	0	0.0341973	0.00899928	0.0773938	0.25234	0.0158387
367	18	2014	august	winter	4	26_08_2014	wild	small_birds	Birds	Passeriformes	NA	NA	Passeriforme	25	JBB	shoulder	2	08:33:00	193368	8234116	23L	sirgass_2000	08:29:00	1	removed	1	0	0	30.8	15.8	24.04	31	2000	two_lane	2	BR_251	0	0.0973675	0.391634	0	0.0533718	0.0566174	0.0147854	0.356293	0.0158673
368	18	2014	august	winter	4	26_08_2014	wild	small_birds	Birds	Passeriformes	NA	NA	Passeriforme	25	PNB	shoulder	2	09:40:00	173280	8252774	23L	sirgass_2000	08:55:00	72	removed	1	3	0	30.8	15.8	24.04	31	8000	two_lane	2	DF_001	0	0.124685	0.11964	0.175856	0.0371171	0.0781982	0.224865	0.20036	0.00864865
369	18	2014	august	winter	4	27_08_2014	wild	large_birds	Birds	Strigiforme	Tytonidae	Tyto_alba	Suindara	500	JBB	shoulder	2	08:06:00	198041	8239618	23L	sirgass_2000	07:43:00	48	removed	1	2	0	31	17.2	24	32.25	7000	four_lane	3	DF_001	0	0.0846542	0.568444	0	0.0652017	0.0226945	0.0742075	0.164265	0
370	18	2014	august	winter	4	27_08_2014	wild	small_birds	Birds	Passeriformes	Tyrannidae	Tyrannus_savana	Tesourinha	33	JBB	shoulder	2	08:18:00	196186	8236635	23L	sirgass_2000	08:33:00	1	removed	1	0	0	31	17.2	24	32.25	2000	two_lane	2	DF_001	0	0.0851905	0.594536	0	0.0240834	0.0136592	0.0995687	0.148454	0.0104242
371	18	2014	august	winter	4	27_08_2014	wild	small_reptiles	Reptile	Squamata	Dipsadidae	Oxyrhopus_sp	Coral_falsa	80	PNB	shoulder	2	09:46:00	171007	8257753	23L	sirgass_2000	09:55:00	1	removed	1	0	0	31	17.2	24	32.25	8000	two_lane	2	DF_001	0	0.0235166	0.308973	0.28437	0.091534	0.223951	0	0.0492041	0.0068741
372	18	2014	august	winter	4	27_08_2014	wild	small_birds	Birds	Passeriformes	Furnariidae	Phacellodomus_rufifrons	Joao_de_pau	24	ESECAE	shoulder	2	11:24:00	218067	8273846	23L	sirgass_2000	11:31:00	1	removed	1	0	0	31	17.2	24	32.25	5000	four_lane	3	BR_010_BR_020_BR_030	0	0.0736086	0.571993	0	0.0402154	0	0.160503	0.114901	0.0172352
373	18	2014	august	winter	4	27_08_2014	wild	large_birds	Birds	Strigiforme	Strigidae	Asio_clamator	Coruja_orelhuda	400	ESECAE	shoulder	2	11:45:00	218197	8273867	23L	sirgass_2000	09:52:00	48	removed	1	2	0	31	17.2	24	32.25	5000	four_lane	3	BR_010_BR_020_BR_030	0	0.0701187	0.582165	0	0.0391945	0	0.145631	0.124056	0.01726
374	18	2014	august	winter	4	27_08_2014	wild	small_birds	Birds	Passeriformes	Tyrannidae	Machetornis_rixosa	Suiriri_Cavalheiro	32	ESECAE	shoulder	2	12:08:00	215636	8278379	23L	sirgass_2000	10:05:00	24	removed	1	1	0	31	17.2	24	32.25	2600	two_lane	2	DF_128	0	0.0735135	0.468108	0	0.0342342	0.00792793	0	0.245405	0.163604
375	19	2014	september	winter	4	22_09_2014	wild	Large_reptiles	Reptile	Squamata	Viperidae	Crotalus_durissus	Cascavel	550	ESECAE	shoulder	2	07:40:00	218667	8273781	23L	sirgass_2000	07:41:00	96	remained	0	4	0	30.8	19	23.92	56.25	5000	four_lane	3	BR_010_BR_020_BR_030	0	0.0640749	0.594312	0	0.0334773	0	0.111591	0.168107	0.00683945
376	19	2014	september	winter	4	22_09_2014	domestic	Large_mammals	Mammals	Carnivora	Canidae	Canis_familiaris	Cachorro_Domestico	10000	ESECAE	shoulder	2	08:05:00	218941	8273809	23L	sirgass_2000	07:46:00	96	remained	0	4	0	30.8	19	23.92	56.25	5000	four_lane	3	BR_010_BR_020_BR_030	0	0.0597337	0.614969	0	0.0305865	0	0.0852825	0.187837	0.000359842
377	19	2014	september	winter	4	22_09_2014	wild	Large_mammals	Mammals	Carnivora	Canidae	Cerdocyon_thous	Cachorro_do_mato	5700	PNB	lane	1	10:06:00	175024	8273597	23L	sirgass_2000	10:39:00	1	removed	1	0	0	30.8	19	23.92	56.25	775	dirt_road	1	DF_001	0	0.0719683	0.359122	0	0.0827636	0.270241	0	0.0788053	0.126304
378	19	2014	september	winter	4	22_09_2014	domestic	medium_mammals	Mammals	Carnivora	Felidae	Felis_catus	Gato_Domestico	5000	PNB	shoulder	2	10:31:00	168963	8261738	23L	sirgass_2000	09:11:00	96	remained	0	4	0	30.8	19	23.92	56.25	775	two_lane	2	DF_001	0	0.0864242	0.360461	0	0.0550954	0.128196	0	0.293122	0.060857
379	19	2014	september	winter	4	23_09_2014	wild	medium_mammals	Mammals	Carnivora	Mustelidae	Galictis_cuja	Furao	1600	FAL	shoulder	2	12:05:00	181815	8231602	23L	sirgass_2000	12:32:00	72	removed	1	3	0	29.8	19.4	24.36	50	2000	two_lane	2	BR_251	0.000718907	0.0237239	0.63839	0	0.119339	0.0780014	0.0377426	0.0564342	0
380	20	2014	october	spring	1	13_10_2014	wild	small_birds	Birds	Passeriformes	Tyrannidae	Elaenia_chiriquensis	Chibum	15	JBB	shoulder	2	08:14:00	194695	8235303	23L	sirgass_2000	08:07:00	1	removed	1	0	0	32.4	20.2	26.4	27.75	2000	two_lane	2	DF_001	0	0.110191	0.483615	0	0.0342096	0.00900252	0.078502	0.24883	0.0158444
381	20	2014	october	spring	1	13_10_2014	domestic	Large_mammals	Mammals	Carnivora	Canidae	Canis_familiaris	Cachorro_Domestico	10000	PNB	shoulder	2	10:02:00	177963	8275298	23L	sirgass_2000	09:28:00	96	remained	0	4	0	32.4	20.2	26.4	27.75	775	two_lane	2	DF_001	0	0.0583784	0.305586	0	0.0558559	0.0616216	0	0.444324	0.0627027
382	20	2014	october	spring	1	13_10_2014	wild	small_birds	Birds	Passeriformes	NA	NA	Passeriforme	25	ESECAE	lane	1	11:57:00	218039	8280855	23L	sirgass_2000	10:10:00	96	remained	0	4	0	32.4	20.2	26.4	27.75	2600	two_lane	2	DF_128	0	0.105659	0.458453	0	0.0454871	0.0204155	0	0.349212	0.00393983
383	20	2014	october	spring	1	14_10_2014	domestic	medium_mammals	Mammals	Carnivora	Felidae	Felis_catus	Gato_Domestico	5000	FAL	shoulder	2	08:19:00	189676	8232034	23L	sirgass_2000	08:19:00	72	removed	1	3	0	33.1	19.9	27.16	25	2000	two_lane	2	BR_251	0	0.0510057	0.718032	0	0.0373563	0.0305316	0	0.154813	0
384	20	2014	october	spring	1	14_10_2014	wild	small_birds	Birds	Passeriformes	Thraupidae	Tangara_sayaca	Sanhaco_cinzento	42	PNB	lane	1	10:40:00	192558	8264241	23L	sirgass_2000	10:44:00	1	removed	1	0	0	33.1	19.9	27.16	25	775	two_lane	2	DF_001	0.000360101	0.155924	0.349658	0	0.0424919	0.149802	0.187252	0.0590565	0.0237667
385	20	2014	october	spring	1	14_10_2014	wild	small_birds	Birds	Apodiforme	Trochilidae	Chlorostilbon_lucidus	Besourinho_de_bico_vermelho	4	ESECAE	lane	1	11:28:00	222309	8274628	23L	sirgass_2000	11:24:00	1	removed	1	0	0	33.1	19.9	27.16	25	5000	four_lane	3	BR_010_BR_020_BR_030	0	0.0150538	0.509319	0.00501792	0.0129032	0.00179211	0	0.424014	0
386	20	2014	october	spring	1	14_10_2014	wild	small_birds	Birds	Passeriformes	Tyrannidae	Tyrannus_savana	Tesourinha	33	ESECAE	shoulder	2	11:41:00	216095	8274028	23L	sirgass_2000	11:37:00	1	removed	1	0	0	33.1	19.9	27.16	25	5000	four_lane	3	BR_010_BR_020_BR_030	0	0.136152	0.460408	0	0.0734504	0.00179147	0.248298	0.0333214	0.0232891
387	20	2014	october	spring	1	14_10_2014	wild	small_birds	Birds	Passeriformes	Furnariidae	Phacellodomus_rufifrons	Joao_de_pau	24	ESECAE	shoulder	2	12:44:00	225705	8277853	23L	sirgass_2000	12:42:00	1	removed	1	0	0	33.1	19.9	27.16	25	951	two_lane	2	BR_010_DF_345	0	0.0151954	0.476845	0	0.0296671	0.0296671	0	0.416425	0
388	20	2014	october	spring	1	14_10_2014	wild	Large_mammals	Mammals	Carnivora	Canidae	Cerdocyon_thous	Cachorro_do_mato	5700	ESECAE	shoulder	2	12:56:00	222101	8274552	23L	sirgass_2000	10:34:00	72	removed	1	3	0	33.1	19.9	27.16	25	5000	four_lane	3	BR_010_BR_020_BR_030	0	0.0166305	0.520969	0.00506146	0.0148228	0.00180766	0	0.409255	0
389	20	2014	october	spring	1	15_10_2014	wild	small_birds	Birds	Passeriformes	Emberizidae	Volatinia_jacariNA	Tiziu	10	PNB	lane	1	10:14:00	183835	8270865	23L	sirgass_2000	10:46:00	1	removed	1	0	0	35	19.1	27.86	19.75	775	two_lane	2	DF_001	0	0.00501792	0.426165	0	0.0967742	0.0888889	0	0.374552	0
390	20	2014	october	spring	1	15_10_2014	wild	small_birds	Birds	Passeriformes	NA	NA	Passeriforme	25	PNB	lane	1	10:36:00	189355	8266802	23L	sirgass_2000	11:00:00	1	removed	1	0	0	35	19.1	27.86	19.75	775	two_lane	2	DF_001	0.000720981	0.0609229	0.660058	0	0.0501081	0.129416	0.0133381	0.0583994	0.0180245
391	20	2014	october	spring	1	15_10_2014	wild	small_birds	Birds	Passeriformes	Thraupidae	Tangara_sayaca	Sanhaco_cinzento	42	ESECAE	shoulder	2	12:00:00	217071	8279855	23L	sirgass_2000	10:06:00	48	removed	1	2	0	35	19.1	27.86	19.75	2600	two_lane	2	DF_128	0	0.0895736	0.48119	0	0.0322465	0.030455	0	0.306342	0.0437119
392	20	2014	october	spring	1	15_10_2014	domestic	large_birds	Ave	Galliforme	Phasianidae	Gallus_gallus_domesticus	Galinha	1500	ESECAE	lane	1	12:15:00	221907	8282317	23L	sirgass_2000	10:16:00	48	removed	1	2	0	35	19.1	27.86	19.75	33	dirt_road	1	DF_205	0.00296626	0.145717	0.531702	0	0.0400445	0.00741565	0	0.232851	0.00593252
393	21	2014	november	spring	1	03_11_2014	wild	small_birds	Birds	Apodiforme	Trochilidae	Colibri_serrirostris	Beija_flor_de_orelha_violeta	8	ESECAE	lane	1	08:35:00	212569	8275119	23L	sirgass_2000	08:56:00	1	removed	1	0	0	29.7	18	23.24	61.25	2600	two_lane	2	DF_128	0.0584205	0.309412	0.192571	0	0.0836639	0.00649116	0.0876307	0.141363	0.0919582
394	21	2014	november	spring	1	03_11_2014	wild	small_reptiles	Reptile	Squamata	Dipsadidae	Philodryas_olfersii	Cobra_verde	150	ESECAE	lane	1	08:54:00	215153	8277883	23L	sirgass_2000	09:11:00	1	removed	1	0	0	29.7	18	23.24	61.25	2600	two_lane	2	DF_128	0	0.0730216	0.456475	0	0.0330935	0.00431655	0	0.245324	0.180576
395	21	2014	november	spring	1	03_11_2014	wild	small_birds	Birds	Passeriformes	Turdidae	Turdus_sp.	Sabia_do_campo	100	ESECAE	shoulder	2	09:01:00	216195	8278956	23L	sirgass_2000	09:40:00	24	removed	1	1	0	29.7	18	23.24	61.25	2600	two_lane	2	DF_128	0	0.0732233	0.478823	0	0.0380474	0.0118449	0	0.254487	0.132448
396	21	2014	november	spring	1	03_11_2014	wild	Large_reptiles	Reptile	Squamata	Boidae	Epicrates_cenchria	Jiboia_arco_iris	3000	ESECAE	lane	1	09:24:00	224403	8282521	23L	sirgass_2000	09:48:00	48	removed	1	2	0	29.7	18	23.24	61.25	33	dirt_road	1	DF_205	0	0.0827297	0.520778	0	0.0312619	0	0	0.332444	0
397	21	2014	november	spring	1	03_11_2014	wild	small_reptiles	Reptile	Squamata	Teiidae	Cnemidophorus_sp.	Lagarto	4	ESECAE	lane	1	09:24:00	224403	8282521	23L	sirgass_2000	09:19:00	24	removed	1	1	0	29.7	18	23.24	61.25	33	dirt_road	1	DF_205	0	0.0827297	0.520778	0	0.0312619	0	0	0.332444	0
398	21	2014	november	spring	1	03_11_2014	wild	small_reptiles	Reptile	Squamata	Teiidae	Cnemidophorus_sp.	Lagarto	4	PNB	lane	1	10:21:00	187338	8268302	23L	sirgass_2000	10:40:00	1	removed	1	0	0	29.7	18	23.24	61.25	775	two_lane	2	DF_001	0.000359971	0.0323974	0.537437	0	0.0568754	0.0428366	0.00143988	0.241541	0.0784737
399	21	2014	november	spring	1	03_11_2014	wild	small_birds	Birds	Passeriformes	NA	NA	Passeriforme	25	PNB	lane	1	10:21:00	187338	8268302	23L	sirgass_2000	10:36:00	24	removed	1	1	0	29.7	18	23.24	61.25	775	two_lane	2	DF_001	0.000359971	0.0323974	0.537437	0	0.0568754	0.0428366	0.00143988	0.241541	0.0784737
400	21	2014	november	spring	1	03_11_2014	wild	small_reptiles	Reptile	Squamata	Teiidae	Cnemidophorus_sp.	Lagarto	4	PNB	lane	1	10:29:00	186395	8268997	23L	sirgass_2000	10:46:00	1	removed	1	0	0	29.7	18	23.24	61.25	775	two_lane	2	DF_001	0.000359971	0.0172786	0.479482	0	0.0593952	0.0446364	0	0.313895	0.0759539
401	21	2014	november	spring	1	03_11_2014	wild	small_birds	Birds	Passeriformes	NA	NA	Passeriforme	25	PNB	lane	1	10:32:00	186373	8269011	23L	sirgass_2000	10:41:00	24	removed	1	1	0	29.7	18	23.24	61.25	775	two_lane	2	DF_001	0.00036062	0.0169492	0.477101	0	0.059863	0.0450775	0	0.315543	0.0760909
402	21	2014	november	spring	1	03_11_2014	wild	small_birds	Birds	Cuculiforme	Cuculidae	Guira_guira	Anu_branco	100	PNB	shoulder	2	10:35:00	185751	8269468	23L	sirgass_2000	10:51:00	1	removed	1	0	0	29.7	18	23.24	61.25	775	two_lane	2	DF_001	0.000359324	0.0114984	0.439095	0	0.0636004	0.0600072	0	0.357528	0.0585699
403	21	2014	november	spring	1	03_11_2014	wild	small_birds	Birds	Cuculiforme	Cuculidae	Guira_guira	Anu_branco	100	PNB	lane	1	10:38:00	185716	8269496	23L	sirgass_2000	10:52:00	1	removed	1	0	0	29.7	18	23.24	61.25	775	two_lane	2	DF_001	0.000359454	0.0115025	0.436736	0	0.0639827	0.0589504	0	0.36161	0.057872
404	21	2014	november	spring	1	03_11_2014	wild	small_birds	Birds	Passeriformes	NA	NA	Passeriforme	25	PNB	lane	1	10:41:00	184910	8270089	23L	sirgass_2000	10:48:00	24	removed	1	1	0	29.7	18	23.24	61.25	775	two_lane	2	DF_001	0	0.0064493	0.418846	0	0.0902902	0.0698674	0	0.381225	0.024364
405	21	2014	november	spring	1	03_11_2014	wild	small_birds	Birds	Passeriformes	Tyrannidae	Pitangus_sulphuratus	Bem_te_vi	60	PNB	lane	1	10:54:00	183845	8270870	23L	sirgass_2000	11:16:00	1	removed	1	0	0	29.7	18	23.24	61.25	775	two_lane	2	DF_001	0	0.00503054	0.425081	0	0.0970176	0.0883938	0	0.375853	0
406	21	2014	november	spring	1	03_11_2014	wild	small_birds	Birds	Passeriformes	NA	NA	Passeriforme	25	PNB	lane	1	11:45:00	173034	8256718	23L	sirgass_2000	11:54:00	24	removed	1	1	0	29.7	18	23.24	61.25	8000	two_lane	2	DF_001	0	0.0241703	0.423521	0.173882	0.0703463	0.169192	0	0.128427	0
407	21	2014	november	spring	1	03_11_2014	domestic	large_birds	Ave	Galliforme	Phasianidae	Gallus_gallus_domesticus	Galinha	1500	PNB	lane	1	11:51:00	173634	8253714	23L	sirgass_2000	12:13:00	1	removed	1	0	0	29.7	18	23.24	61.25	8000	two_lane	2	DF_001	0	0.117711	0.162347	0.168467	0.0349172	0.0943125	0.0885529	0.302736	0.00359971
408	21	2014	november	spring	1	03_11_2014	wild	small_birds	Birds	Passeriformes	NA	NA	Passeriforme	25	FAL	lane	1	12:36:00	183402	8231164	23L	sirgass_2000	13:26:00	1	removed	1	0	0	29.7	18	23.24	61.25	2000	two_lane	2	BR_251	0.000719942	0.0194384	0.736501	0	0.117711	0.0313175	0.0111591	0.0565155	0
409	21	2014	november	spring	1	03_11_2014	wild	Large_reptiles	Reptile	Squamata	Dipsadidae	Boiruna_maculata	Cobra_Preta	180	JBB	lane	1	13:15:00	197943	8239377	23L	sirgass_2000	11:25:00	96	remained	0	4	0	29.7	18	23.24	61.25	7000	four_lane	3	DF_001	0	0.0869408	0.595238	0	0.0696248	0.0205628	0.0505051	0.156566	0
410	21	2014	november	spring	1	04_11_2014	wild	small_birds	Birds	Passeriformes	Tyrannidae	Tyrannus_savana	Tesourinha	33	ESECAE	shoulder	2	08:03:00	218617	8273788	23L	sirgass_2000	07:47:00	1	removed	1	0	8.1	28.4	18.8	22.24	75.25	5000	four_lane	3	BR_010_BR_020_BR_030	0	0.0646088	0.593683	0	0.0340991	0	0.114142	0.163317	0.00897344
411	21	2014	november	spring	1	04_11_2014	wild	small_reptiles	Reptile	Squamata	Dipsadidae	Oxyrhopus_sp	Coral_falsa	80	ESECAE	lane	1	08:03:00	218617	8273788	23L	sirgass_2000	07:47:00	1	removed	1	0	8.1	28.4	18.8	22.24	75.25	5000	four_lane	3	BR_010_BR_020_BR_030	0	0.0646088	0.593683	0	0.0340991	0	0.114142	0.163317	0.00897344
412	21	2014	november	spring	1	04_11_2014	wild	small_birds	Birds	Passeriformes	Tyrannidae	Tyrannus_savana	Tesourinha	33	ESECAE	shoulder	2	08:21:00	223316	8274943	23L	sirgass_2000	08:43:00	72	removed	1	3	8.1	28.4	18.8	22.24	75.25	5000	four_lane	3	BR_010_BR_020_BR_030	0	0.0140338	0.45376	0.00467794	0.00539763	0.00107953	0	0.489385	0
413	21	2014	november	spring	1	04_11_2014	domestic	Large_mammals	Mammals	Carnivora	Canidae	Canis_familiaris	Cachorro_Domestico	10000	ESECAE	shoulder	2	08:33:00	220897	8274192	23L	sirgass_2000	08:46:00	72	removed	1	3	8.1	28.4	18.8	22.24	75.25	5000	four_lane	3	BR_010_BR_020_BR_030	0	0.0211849	0.587074	0	0.0240575	0.00143627	0	0.342549	0
414	21	2014	november	spring	1	04_11_2014	wild	small_birds	Birds	Passeriformes	NA	NA	Passeriforme	25	ESECAE	lane	1	09:15:00	216454	8279221	23L	sirgass_2000	08:41:00	1	removed	1	0	8.1	28.4	18.8	22.24	75.25	2600	two_lane	2	DF_128	0	0.077366	0.480389	0	0.0356243	0.0187118	0	0.262684	0.110471
415	21	2014	november	spring	1	04_11_2014	wild	small_birds	Birds	Passeriformes	Thraupidae	Tangara_sayaca	Sanhaco_cinzento	42	ESECAE	shoulder	2	09:20:00	217531	8280328	23L	sirgass_2000	08:45:00	1	removed	1	0	8.1	28.4	18.8	22.24	75.25	2600	two_lane	2	DF_128	0	0.106115	0.478417	0	0.0338129	0.0255396	0	0.330935	0.00863309
416	21	2014	november	spring	1	04_11_2014	wild	small_birds	Birds	Passeriformes	Tyrannidae	Tyrannus_savana	Tesourinha	33	ESECAE	shoulder	2	09:25:00	218223	8281041	23L	sirgass_2000	09:22:00	72	removed	1	3	8.1	28.4	18.8	22.24	75.25	2600	two_lane	2	DF_128	0	0.108993	0.452878	0	0.052518	0.0201439	0	0.341367	0.00755396
417	21	2014	november	spring	1	04_11_2014	wild	small_birds	Birds	Apodiforme	Trochilidae	NA	Beija_flor	8	ESECAE	shoulder	2	09:25:00	218223	8281041	23L	sirgass_2000	09:22:00	48	removed	1	2	8.1	28.4	18.8	22.24	75.25	2600	two_lane	2	DF_128	0	0.108993	0.452878	0	0.052518	0.0201439	0	0.341367	0.00755396
418	21	2014	november	spring	1	04_11_2014	domestic	small_birds	Ave	Passeriformes	Passeridae	Passer_domesticus	Pardal	26	PNB	shoulder	2	10:36:00	188862	8267180	23L	sirgass_2000	10:40:00	24	removed	1	1	8.1	28.4	18.8	22.24	75.25	775	two_lane	2	DF_001	0.000720202	0.0558156	0.633777	0	0.0568959	0.100108	0.00864242	0.092906	0.0421318
419	21	2014	november	spring	1	04_11_2014	wild	small_birds	Birds	Passeriformes	NA	NA	Passeriforme	25	PNB	shoulder	2	10:53:00	185552	8269618	23L	sirgass_2000	10:45:00	1	removed	1	0	8.1	28.4	18.8	22.24	75.25	775	two_lane	2	DF_001	0	0.00937613	0.425532	0	0.0685179	0.0641904	0	0.370718	0.0526506
420	21	2014	november	spring	1	04_11_2014	wild	small_birds	Birds	Passeriformes	NA	NA	Passeriforme	25	PNB	lane	1	10:56:00	185512	8269647	23L	sirgass_2000	10:45:00	1	removed	1	0	8.1	28.4	18.8	22.24	75.25	775	two_lane	2	DF_001	0	0.00868307	0.4233	0	0.0709117	0.065123	0	0.371925	0.051013
421	21	2014	november	spring	1	04_11_2014	wild	small_birds	Birds	Passeriformes	NA	NA	Passeriforme	25	PNB	shoulder	2	10:57:00	185497	8269657	23L	sirgass_2000	10:46:00	1	removed	1	0	8.1	28.4	18.8	22.24	75.25	775	two_lane	2	DF_001	0	0.00863931	0.422606	0	0.0716343	0.0651548	0	0.37221	0.0507559
422	21	2014	november	spring	1	04_11_2014	wild	small_birds	Birds	Passeriformes	Thraupidae	Cypsnagra_hirundinacea	Bandoleta	28	PNB	shoulder	2	11:01:00	185363	8269757	23L	sirgass_2000	10:59:00	24	removed	1	1	8.1	28.4	18.8	22.24	75.25	775	two_lane	2	DF_001	0	0.0075431	0.420259	0	0.0757902	0.0678879	0	0.374641	0.0445402
423	21	2014	november	spring	1	04_11_2014	wild	small_birds	Birds	Passeriformes	Mimidae	Mimus_saturninus	Sabia_do_campo	73	PNB	shoulder	2	11:51:00	168818	8263427	23L	sirgass_2000	11:38:00	1	removed	1	0	8.1	28.4	18.8	22.24	75.25	775	two_lane	2	DF_001	0	0.0971326	0.372401	0	0.0390681	0.0992832	0	0.281362	0.0921147
424	21	2014	november	spring	1	04_11_2014	wild	small_birds	Birds	Passeriformes	Emberizidae	Volatinia_jacariNA	Tiziu	10	FAL	shoulder	2	13:33:00	186174	8230680	23L	sirgass_2000	12:50:00	1	removed	1	0	8.1	28.4	18.8	22.24	75.25	2000	two_lane	2	BR_251	0	0.0219978	0.897944	0	0.059863	0.00757303	0	0.00288496	0
425	21	2014	november	spring	1	04_11_2014	wild	small_birds	Birds	Passeriformes	Emberizidae	Emberizoides_herbicola	CaNArio_do_campo	15	IBGE	shoulder	2	13:52:00	193448	8234176	23L	sirgass_2000	11:34:00	72	removed	1	3	8.1	28.4	18.8	22.24	75.25	2000	two_lane	2	BR_251	0	0.0986676	0.39431	0	0.0522146	0.0547353	0.018005	0.352179	0.0158444
426	21	2014	november	spring	1	05_11_2014	wild	small_reptiles	Reptile	Squamata	Dipsadidae	Oxyrhopus_guibei	Coral_falsa	80	ESECAE	shoulder	2	07:49:00	218870	8273763	23L	sirgass_2000	08:36:00	48	removed	1	2	3.8	29.3	17.9	22.56	67	5000	four_lane	3	BR_010_BR_020_BR_030	0	0.0614224	0.604526	0	0.03125	0	0.0933908	0.186422	0.00143678
427	21	2014	november	spring	1	05_11_2014	wild	small_birds	Birds	Passeriformes	Tyrannidae	Tyrannus_savana	Tesourinha	33	ESECAE	lane	1	07:52:00	219578	8273736	23L	sirgass_2000	08:24:00	1	removed	1	0	3.8	29.3	17.9	22.56	67	5000	four_lane	3	BR_010_BR_020_BR_030	0	0.0391523	0.621408	0	0.0272989	0.000359195	0.0362787	0.25431	0
428	21	2014	november	spring	1	05_11_2014	wild	small_birds	Birds	Passeriformes	NA	NA	Passeriforme	25	ESECAE	shoulder	2	08:27:00	212699	8275356	23L	sirgass_2000	09:06:00	1	removed	1	0	3.8	29.3	17.9	22.56	67	2600	two_lane	2	DF_128	0.0583784	0.302703	0.20973	0	0.0720721	0.00648649	0.0724324	0.141261	0.10991
429	21	2014	november	spring	1	05_11_2014	wild	small_birds	Birds	Passeriformes	NA	NA	Passeriforme	25	ESECAE	shoulder	2	08:35:00	215531	8278271	23L	sirgass_2000	09:18:00	1	removed	1	0	3.8	29.3	17.9	22.56	67	2600	two_lane	2	DF_128	0	0.0748201	0.466187	0	0.028777	0.00719424	0	0.247482	0.168345
430	21	2014	november	spring	1	05_11_2014	wild	small_birds	Birds	Passeriformes	NA	NA	Passeriforme	25	ESECAE	lane	1	09:35:00	227690	8280545	23L	sirgass_2000	10:07:00	24	removed	1	1	3.8	29.3	17.9	22.56	67	951	two_lane	2	BR_010_DF_345	0	0.027967	0.347436	0	0.0297598	0.0294012	0	0.531373	0
431	21	2014	november	spring	1	05_11_2014	wild	small_birds	Birds	Passeriformes	Emberizidae	Volatinia_jacariNA	Tiziu	10	ESECAE	shoulder	2	09:46:00	224204	8275813	23L	sirgass_2000	10:15:00	1	removed	1	0	3.8	29.3	17.9	22.56	67	951	two_lane	2	BR_010_DF_345	0	0.0139885	0.480273	0.00430416	0.0053802	0.00071736	0	0.457317	0
432	21	2014	november	spring	1	05_11_2014	domestic	small_birds	Ave	Passeriformes	Passeridae	Passer_domesticus	Pardal	26	PNB	lane	1	10:27:00	188472	8267470	23L	sirgass_2000	10:53:00	1	removed	1	0	3.8	29.3	17.9	22.56	67	775	two_lane	2	DF_001	0.000718907	0.0492451	0.610352	0	0.0596693	0.0790798	0.00718907	0.129403	0.0549964
433	21	2014	november	spring	1	05_11_2014	wild	large_birds	Birds	Strigiforme	Strigidae	Athene_cunicularia	Coruja_Buraqueira	200	PNB	lane	1	10:30:00	187924	8267873	23L	sirgass_2000	10:48:00	1	removed	1	0	3.8	29.3	17.9	22.56	67	775	two_lane	2	DF_001	0.000359583	0.0417116	0.578569	0	0.0596908	0.0550162	0.00719166	0.177994	0.0704782
434	21	2014	november	spring	1	05_11_2014	wild	small_birds	Birds	Passeriformes	NA	NA	Passeriforme	25	PNB	shoulder	2	10:42:00	186368	8269018	23L	sirgass_2000	09:55:00	48	removed	1	2	3.8	29.3	17.9	22.56	67	775	two_lane	2	DF_001	0.00036062	0.0165885	0.477101	0	0.059863	0.0450775	0	0.315903	0.0760909
435	21	2014	november	spring	1	05_11_2014	wild	small_birds	Birds	Passeriformes	Emberizidae	Volatinia_jacariNA	Tiziu	10	PNB	lane	1	11:35:00	168802	8263592	23L	sirgass_2000	10:31:00	48	removed	1	2	3.8	29.3	17.9	22.56	67	775	two_lane	2	DF_001	0	0.0965542	0.367193	0	0.0373295	0.101938	0	0.279612	0.0987078
436	21	2014	november	spring	1	05_11_2014	wild	small_birds	Birds	Passeriformes	Tyrannidae	Tyrannus_savana	Tesourinha	33	FAL	shoulder	2	13:00:00	190936	8232517	23L	sirgass_2000	10:47:00	48	removed	1	2	3.8	29.3	17.9	22.56	67	2000	two_lane	2	BR_251	0	0.0584205	0.537324	0	0.0461594	0.0685179	0.00288496	0.277678	0
437	21	2014	november	spring	1	05_11_2014	wild	small_birds	Birds	Passeriformes	Emberizidae	Volatinia_jacariNA	Tiziu	10	FAL	shoulder	2	13:07:00	193102	8233863	23L	sirgass_2000	13:11:00	1	removed	1	0	3.8	29.3	17.9	22.56	67	2000	two_lane	2	BR_251	0	0.0903203	0.378194	0	0.0554156	0.0644117	0.00575747	0.377114	0.015833
438	21	2014	november	spring	1	05_11_2014	wild	large_birds	Birds	Strigiforme	Strigidae	NA	Coruja	200	IBGE	shoulder	2	13:11:00	193527	8234243	23L	sirgass_2000	13:21:00	1	removed	1	0	3.8	29.3	17.9	22.56	67	2000	two_lane	2	BR_251	0	0.0988497	0.400431	0	0.0514019	0.0514019	0.0222861	0.345435	0.015816
439	22	2014	december	spring	1	08_12_2014	wild	small_mammals	Mammals	Chiroptera	NA	NA	Morcego	20	JBB	shoulder	2	08:02:00	197865	8241366	23L	sirgass_2000	07:59:00	1	removed	1	0	15.2	20	17.1	18.32	91	7000	four_lane	3	DF_001	0.000359583	0.106796	0.380439	0	0.148148	0.0481841	0.144912	0.14635	0
440	22	2014	december	spring	1	08_12_2014	wild	Large_reptiles	Reptile	Squamata	Dipsadidae	Helicops_modestus	Cobra_Preta	180	JBB	shoulder	2	08:25:00	198034	8239593	23L	sirgass_2000	08:20:00	96	remained	0	4	15.2	20	17.1	18.32	91	7000	four_lane	3	DF_001	0	0.0849838	0.57148	0	0.0666187	0.0212459	0.0723803	0.162766	0
441	22	2014	december	spring	1	08_12_2014	wild	small_birds	Birds	Passeriformes	Emberizidae	Volatinia_jacariNA	Tiziu	10	JBB	lane	1	08:39:00	194725	8235331	23L	sirgass_2000	08:39:00	1	removed	1	0	15.2	20	17.1	18.32	91	2000	two_lane	2	DF_001	0	0.108954	0.486156	0	0.0330816	0.00898957	0.0798274	0.247033	0.0158216
442	22	2014	december	spring	1	08_12_2014	wild	small_birds	Birds	Passeriformes	Emberizidae	Volatinia_jacariNA	Tiziu	10	PNB	shoulder	2	10:32:00	173481	8255771	23L	sirgass_2000	10:01:00	1	removed	1	0	15.2	20	17.1	18.32	91	8000	two_lane	2	DF_001	0	0.0424308	0.350234	0.16361	0.0575333	0.124416	0	0.25027	0
443	22	2014	december	spring	1	08_12_2014	wild	small_birds	Birds	Passeriformes	Emberizidae	Volatinia_jacariNA	Tiziu	10	PNB	shoulder	2	10:35:00	173446	8255853	23L	sirgass_2000	10:02:00	1	removed	1	0	15.2	20	17.1	18.32	91	8000	two_lane	2	DF_001	0	0.0397849	0.355914	0.165233	0.0587814	0.130108	0	0.23871	0
444	22	2014	december	spring	1	08_12_2014	wild	small_reptiles	Reptile	Squamata	Dipsadidae	Philodryas_patagoniensis	Cobra_cipo	150	PNB	shoulder	2	12:05:00	186708	8268757	23L	sirgass_2000	11:24:00	1	removed	1	0	15.2	20	17.1	18.32	91	775	two_lane	2	DF_001	0.000361795	0.0209841	0.495297	0	0.0640376	0.0383502	0	0.293054	0.079233
445	22	2014	december	spring	1	08_12_2014	domestic	small_birds	Ave	Passeriformes	Passeridae	Passer_domesticus	Pardal	26	ESECAE	shoulder	2	13:21:00	220259	8273993	23L	sirgass_2000	13:11:00	1	removed	1	0	15.2	20	17.1	18.32	91	5000	four_lane	3	BR_010_BR_020_BR_030	0	0.0223665	0.628066	0	0.025974	0.00108225	0.00721501	0.293651	0
446	22	2014	december	spring	1	08_12_2014	domestic	medium_mammals	Mammals	Carnivora	Felidae	Felis_catus	Gato_Domestico	5000	ESECAE	lane	1	13:23:00	220283	8273998	23L	sirgass_2000	10:10:00	96	remained	0	4	15.2	20	17.1	18.32	91	5000	four_lane	3	BR_010_BR_020_BR_030	0	0.0219741	0.626801	0	0.0259366	0.00144092	0.00684438	0.295389	0
447	22	2014	december	spring	1	08_12_2014	wild	small_reptiles	Reptile	Squamata	Dipsadidae	NA	Coral_falsa	80	ESECAE	shoulder	2	13:24:00	220283	8273998	23L	sirgass_2000	10:10:00	72	removed	1	3	15.2	20	17.1	18.32	91	5000	four_lane	3	BR_010_BR_020_BR_030	0	0.0219741	0.626801	0	0.0259366	0.00144092	0.00684438	0.295389	0
448	22	2014	december	spring	1	08_12_2014	domestic	medium_mammals	Mammals	Carnivora	Felidae	Felis_catus	Gato_Domestico	5000	ESECAE	shoulder	2	13:45:00	213386	8276064	23L	sirgass_2000	10:27:00	96	remained	0	4	15.2	20	17.1	18.32	91	2600	two_lane	2	DF_128	0.0569892	0.239427	0.292115	0	0.0458781	0	0.0175627	0.145878	0.175986
449	22	2014	december	spring	1	09_12_2014	domestic	medium_mammals	Mammals	Carnivora	Felidae	Felis_catus	Gato_Domestico	5000	JBB	shoulder	2	08:15:00	197217	8237789	23L	sirgass_2000	08:17:00	72	removed	1	3	3.4	22.5	17.5	19.8	81.75	7000	four_lane	3	DF_001	0	0.108079	0.62298	0	0.0610413	0.0183124	0.0330341	0.133573	0
450	22	2014	december	spring	1	09_12_2014	wild	small_birds	Birds	Columbiforme	Columbidae	NA	Rolinha	40	JBB	lane	1	08:30:00	196280	8236720	23L	sirgass_2000	08:50:00	1	removed	1	0	3.4	22.5	17.5	19.8	81.75	2000	two_lane	2	DF_001	0	0.0836337	0.599495	0	0.0259553	0.0136986	0.0976929	0.147441	0.00829128
451	22	2014	december	spring	1	09_12_2014	domestic	Large_mammals	Mammals	Carnivora	Canidae	Canis_familiaris	Cachorro_Domestico	10000	PNB	shoulder	2	09:56:00	173578	8255490	23L	sirgass_2000	09:22:00	24	removed	1	1	3.4	22.5	17.5	19.8	81.75	8000	two_lane	2	DF_001	0	0.0501262	0.33141	0.160115	0.0555355	0.108907	0	0.283087	0
452	22	2014	december	spring	1	09_12_2014	wild	small_birds	Birds	Caprimulgiforme	Caprimulgidae	NA	Bacurau	45	PNB	lane	1	10:53:00	176937	8275370	23L	sirgass_2000	10:53:00	1	removed	1	0	3.4	22.5	17.5	19.8	81.75	775	two_lane	2	DF_001	0	0.0512912	0.295194	0	0.0563128	0.0936155	0	0.370875	0.120875
453	22	2014	december	spring	1	09_12_2014	wild	small_birds	Birds	Passeriformes	Emberizidae	Volatinia_jacariNA	Tiziu	10	PNB	lane	1	11:06:00	183421	8271172	23L	sirgass_2000	11:08:00	1	removed	1	0	3.4	22.5	17.5	19.8	81.75	775	two_lane	2	DF_001	0	0.00538987	0.433705	0	0.0973769	0.0912684	0	0.363636	0
454	22	2014	december	spring	1	09_12_2014	wild	small_birds	Birds	Passeriformes	Tyrannidae	Tyrannus_savana	Tesourinha	33	ESECAE	lane	1	12:45:00	219270	8273733	23L	sirgass_2000	12:50:00	1	removed	1	0	3.4	22.5	17.5	19.8	81.75	5000	four_lane	3	BR_010_BR_020_BR_030	0	0.0489209	0.614388	0	0.0291367	0	0.0593525	0.226978	0
455	22	2014	december	spring	1	09_12_2014	wild	small_birds	Birds	Passeriformes	NA	NA	Passeriforme	25	ESECAE	shoulder	2	13:03:00	223443	8274984	23L	sirgass_2000	10:05:00	72	removed	1	3	3.4	22.5	17.5	19.8	81.75	5000	four_lane	3	BR_010_BR_020_BR_030	0	0.0144092	0.444885	0.00360231	0.00540346	0.000360231	0	0.49928	0
456	22	2014	december	spring	1	09_12_2014	domestic	large_birds	Ave	Galliforme	Phasianidae	Gallus_gallus_domesticus	Galinha	1500	ESECAE	shoulder	2	13:23:00	213997	8274096	23L	sirgass_2000	10:18:00	72	removed	1	3	3.4	22.5	17.5	19.8	81.75	5000	four_lane	3	BR_010_BR_020_BR_030	0.0122302	0.242446	0.244604	0	0.0744604	0.00863309	0.25	0.0982014	0.0366906
457	22	2014	december	spring	1	10_12_2014	wild	small_reptiles	Reptile	Squamata	Dipsadidae	Oxyrhopus_guibei	Coral_falsa	80	JBB	shoulder	2	08:30:00	197519	8238364	23L	sirgass_2000	07:55:00	1	removed	1	0	3.6	24.7	17.9	20.78	76.5	7000	four_lane	3	DF_001	0	0.092446	0.631655	0	0.0708633	0.0194245	0.0143885	0.15036	0
458	22	2014	december	spring	1	10_12_2014	wild	small_birds	Birds	Passeriformes	Emberizidae	Volatinia_jacariNA	Tiziu	10	IBGE	shoulder	2	09:01:00	192968	8233760	23L	sirgass_2000	08:14:00	1	removed	1	0	3.6	24.7	17.9	20.78	76.5	2000	two_lane	2	BR_251	0	0.0854885	0.380388	0	0.0571121	0.0675287	0.00395115	0.377514	0.0158046
459	22	2014	december	spring	1	10_12_2014	wild	small_birds	Birds	Passeriformes	Tyrannidae	Tyrannus_savana	Tesourinha	33	ESECAE	shoulder	2	12:54:00	220473	8274007	23L	sirgass_2000	10:13:00	48	removed	1	2	3.6	24.7	17.9	20.78	76.5	5000	four_lane	3	BR_010_BR_020_BR_030	0	0.0216294	0.614996	0	0.0259553	0.00144196	0.00216294	0.311824	0
460	22	2014	december	spring	1	10_12_2014	wild	small_birds	Birds	Passeriformes	Emberizidae	Volatinia_jacariNA	Tiziu	10	ESECAE	lane	1	13:05:00	223735	8275072	23L	sirgass_2000	11:27:00	1	removed	1	0	3.6	24.7	17.9	20.78	76.5	5000	four_lane	3	BR_010_BR_020_BR_030	0	0.0154621	0.426465	0.0021575	0.00539374	0.000719166	0	0.512406	0
461	23	2015	january	summer	2	12_01_2015	domestic	large_birds	Ave	Galliforme	Phasianidae	Gallus_gallus_domesticus	Galinha	1500	ESECAE	shoulder	2	09:22:00	214242	8274096	23L	sirgass_2000	09:17:00	96	remained	0	4	0	30.9	20.2	25.92	46.25	5000	four_lane	3	BR_010_BR_020_BR_030	0.00431655	0.226978	0.278058	0	0.0723022	0.00863309	0.25	0.0913669	0.0359712
462	23	2015	january	summer	2	12_01_2015	domestic	Large_mammals	Mammals	Carnivora	Canidae	Canis_familiaris	Cachorro_Domestico	10000	ESECAE	shoulder	2	09:48:00	221724	8274444	23L	sirgass_2000	09:27:00	96	remained	0	4	0	30.9	20.2	25.92	46.25	5000	four_lane	3	BR_010_BR_020_BR_030	0	0.0183321	0.540978	0.00359454	0.0194105	0.00179727	0	0.384975	0
463	23	2015	january	summer	2	12_01_2015	wild	small_birds	Birds	Passeriformes	Emberizidae	Volatinia_jacariNA	Tiziu	10	ESECAE	lane	1	10:07:00	212726	8275383	23L	sirgass_2000	09:44:00	72	removed	1	3	0	30.9	20.2	25.92	46.25	2600	two_lane	2	DF_128	0.0581688	0.301257	0.212567	0	0.0710952	0.0064632	0.0710952	0.140754	0.11167
464	23	2015	january	summer	2	12_01_2015	wild	small_birds	Birds	Cuculiforme	Cuculidae	Crotophaga_ani	Anu_preto	100	ESECAE	shoulder	2	10:12:00	213377	8276053	23L	sirgass_2000	10:09:00	48	removed	1	2	0	30.9	20.2	25.92	46.25	2600	two_lane	2	DF_128	0.0569484	0.239613	0.290473	0	0.0462034	0	0.019341	0.145774	0.175501
465	23	2015	january	summer	2	12_01_2015	wild	small_birds	Birds	Passeriformes	Emberizidae	Volatinia_jacariNA	Tiziu	10	ESECAE	shoulder	2	10:17:00	214406	8277113	23L	sirgass_2000	09:43:00	1	removed	1	0	0	30.9	20.2	25.92	46.25	2600	two_lane	2	DF_128	0.00681004	0.12509	0.411111	0	0.0433692	0.00215054	0	0.17276	0.22509
466	23	2015	january	summer	2	12_01_2015	wild	Large_reptiles	Reptile	Squamata	Viperidae	Crotalus_durissus	Cascavel	550	ESECAE	shoulder	2	10:25:00	216735	8279509	23L	sirgass_2000	10:29:00	48	removed	1	2	0	30.9	20.2	25.92	46.25	2600	two_lane	2	DF_128	0	0.0810227	0.481095	0	0.0334894	0.0277278	0	0.280879	0.0792222
467	23	2015	january	summer	2	12_01_2015	wild	small_birds	Birds	Passeriformes	NA	NA	Passeriforme	25	ESECAE	lane	1	10:30:00	217651	8280451	23L	sirgass_2000	10:34:00	24	removed	1	1	0	30.9	20.2	25.92	46.25	2600	two_lane	2	DF_128	0	0.107963	0.474175	0	0.0355093	0.0233142	0	0.337159	0.0053802
468	23	2015	january	summer	2	12_01_2015	wild	small_birds	Birds	Passeriformes	NA	NA	Passeriforme	25	PNB	lane	1	12:21:00	182439	8271916	23L	sirgass_2000	11:23:00	1	removed	1	0	0	30.9	20.2	25.92	46.25	775	two_lane	2	DF_001	0	0.0230714	0.44881	0	0.114275	0.07354	0	0.331291	0
469	23	2015	january	summer	2	12_01_2015	wild	large_birds	Birds	Accipitriformes	Accipitridae	Geranoaetus_albicaudatus	Gaviao_de_rabo_branco	900	PNB	lane	1	12:40:00	174772	8273270	23L	sirgass_2000	13:47:00	24	removed	1	1	0	30.9	20.2	25.92	46.25	775	dirt_road	1	DF_001	0	0.0722502	0.373832	0	0.0819554	0.290798	0	0.0564342	0.115025
470	23	2015	january	summer	2	12_01_2015	wild	small_birds	Birds	Passeriformes	Emberizidae	Volatinia_jacariNA	Tiziu	10	JBB	lane	1	14:29:00	193342	8234080	23L	sirgass_2000	11:31:00	96	remained	0	4	0	30.9	20.2	25.92	46.25	2000	two_lane	2	BR_251	0	0.0966114	0.388609	0	0.0529921	0.057318	0.0140591	0.360851	0.0158616
471	23	2015	january	summer	2	12_01_2015	wild	small_birds	Birds	Passeriformes	Emberizidae	Volatinia_jacariNA	Tiziu	10	JBB	lane	1	14:42:00	197199	8237752	23L	sirgass_2000	14:05:00	1	removed	1	0	0	30.9	20.2	25.92	46.25	7000	four_lane	3	DF_001	0	0.109353	0.621223	0	0.0604317	0.0183453	0.0348921	0.132734	0
472	23	2015	january	summer	2	13_01_2015	wild	Large_reptiles	Reptile	Squamata	Viperidae	Crotalus_durissus	Cascavel	550	ESECAE	shoulder	2	09:39:00	213511	8276191	23L	sirgass_2000	10:09:00	1	removed	1	0	0	31	18.2	23.96	58	2600	two_lane	2	DF_128	0.0519713	0.226882	0.306452	0	0.044086	0	0.00824373	0.149462	0.187097
473	23	2015	january	summer	2	13_01_2015	wild	small_birds	Birds	Passeriformes	NA	NA	Passeriforme	25	PNB	lane	1	11:13:00	184091	8270694	23L	sirgass_2000	12:34:00	1	removed	1	0	0	31	18.2	23.96	58	775	two_lane	2	DF_001	0	0.00503416	0.419633	0	0.095649	0.0870191	0	0.383675	0
474	23	2015	january	summer	2	13_01_2015	wild	small_birds	Birds	Passeriformes	Emberizidae	Volatinia_jacariNA	Tiziu	10	PNB	lane	1	11:16:00	183858	8270865	23L	sirgass_2000	12:37:00	1	removed	1	0	0	31	18.2	23.96	58	775	two_lane	2	DF_001	0	0.00504323	0.423631	0	0.096902	0.0886167	0	0.377161	0
475	23	2015	january	summer	2	13_01_2015	wild	small_birds	Birds	Passeriformes	Emberizidae	Volatinia_jacariNA	Tiziu	10	PNB	lane	1	12:16:00	173426	8255870	23L	sirgass_2000	10:41:00	72	removed	1	3	0	31	18.2	23.96	58	8000	two_lane	2	DF_001	0	0.0395968	0.357451	0.168826	0.0590353	0.13031	0	0.233261	0
476	23	2015	january	summer	2	13_01_2015	domestic	medium_mammals	Mammals	Carnivora	Felidae	Felis_catus	Gato_Domestico	5000	FAL	shoulder	2	13:31:00	180594	8231463	23L	sirgass_2000	11:20:00	72	removed	1	3	0	31	18.2	23.96	58	2000	two_lane	2	BR_251	0.000719166	0.0298454	0.524272	0	0.097447	0.170442	0.0690399	0.0564545	0
477	23	2015	january	summer	2	14_01_2015	wild	small_reptiles	Reptile	Squamata	Dipsadidae	Oxyrhopus_guibei	Coral_falsa	80	ESECAE	shoulder	2	09:43:00	213881	8274068	23L	sirgass_2000	09:35:00	48	removed	1	2	0	30.3	18	24.6	42.25	5000	four_lane	3	BR_010_BR_020_BR_030	0.0154232	0.247131	0.228479	0	0.0738881	0.00860832	0.254663	0.101865	0.0373027
478	23	2015	january	summer	2	14_01_2015	domestic	medium_mammals	Mammals	Carnivora	Felidae	Felis_catus	Gato_Domestico	5000	ESECAE	lane	1	09:47:00	213664	8274006	23L	sirgass_2000	09:58:00	1	removed	1	0	0	30.3	18	24.6	42.25	5000	four_lane	3	BR_010_BR_020_BR_030	0.0227109	0.248738	0.209805	0	0.0778659	0.00865177	0.255227	0.104542	0.0392934
479	23	2015	january	summer	2	14_01_2015	wild	small_birds	Birds	Caprimulgiforme	Caprimulgidae	NA	Bacurau	45	ESECAE	lane	1	09:55:00	213107	8273764	23L	sirgass_2000	09:37:00	48	removed	1	2	0	30.3	18	24.6	42.25	2600	two_lane	2	DF_128	0.0431499	0.264293	0.171161	0	0.0798274	0.00898957	0.229773	0.107156	0.0625674
480	23	2015	january	summer	2	14_01_2015	wild	small_mammals	Mammals	Primates	Cebidae	Callithrix_penicillata	Sagui	400	ESECAE	shoulder	2	09:57:00	213005	8273872	23L	sirgass_2000	09:37:00	48	removed	1	2	0	30.3	18	24.6	42.25	2600	two_lane	2	DF_128	0.05199	0.264252	0.170312	0	0.0828254	0.00860523	0.214414	0.108641	0.0652564
481	23	2015	january	summer	2	14_01_2015	wild	small_birds	Birds	Apodiforme	Trochilidae	NA	Beija_flor	8	ESECAE	lane	1	10:17:00	215135	8277862	23L	sirgass_2000	09:47:00	48	removed	1	2	0	30.3	18	24.6	42.25	2600	two_lane	2	DF_128	0	0.0727338	0.456826	0	0.034038	0.00394124	0	0.245073	0.180222
482	23	2015	january	summer	2	14_01_2015	wild	small_birds	Birds	Passeriformes	Emberizidae	Volatinia_jacariNA	Tiziu	10	ESECAE	shoulder	2	10:22:00	216000	8278752	23L	sirgass_2000	10:24:00	1	removed	1	0	0	30.3	18	24.6	42.25	2600	two_lane	2	DF_128	0	0.0700867	0.476156	0	0.0379335	0.0115607	0	0.251445	0.144509
483	23	2015	january	summer	2	14_01_2015	wild	small_birds	Birds	Passeriformes	Emberizidae	Volatinia_jacariNA	Tiziu	10	ESECAE	shoulder	2	10:24:00	216021	8278773	23L	sirgass_2000	10:25:00	1	removed	1	0	0	30.3	18	24.6	42.25	2600	two_lane	2	DF_128	0	0.0700431	0.475934	0	0.0384339	0.0114943	0	0.252874	0.142241
484	23	2015	january	summer	2	14_01_2015	wild	small_birds	Birds	Passeriformes	Emberizidae	Volatinia_jacariNA	Tiziu	10	ESECAE	lane	1	10:31:00	217435	8280230	23L	sirgass_2000	09:52:00	48	removed	1	2	0	30.3	18	24.6	42.25	2600	two_lane	2	DF_128	0	0.103597	0.479856	0	0.0345324	0.0273381	0	0.32446	0.0140288
485	23	2015	january	summer	2	14_01_2015	wild	large_birds	Birds	Cariamiformes	Cariamidae	Cariama_cristata	Siriema	1500	PNB	shoulder	2	11:40:00	191136	8265478	23L	sirgass_2000	11:50:00	1	removed	1	0	0	30.3	18	24.6	42.25	775	two_lane	2	DF_001	0.000719942	0.0777538	0.507559	0	0.0467963	0.225342	0.0604752	0.0608351	0.00791937
486	23	2015	january	summer	2	14_01_2015	wild	small_birds	Birds	Passeriformes	Emberizidae	Volatinia_jacariNA	Tiziu	10	PNB	lane	1	11:55:00	187558	8268142	23L	sirgass_2000	11:59:00	1	removed	1	0	0	30.3	18	24.6	42.25	775	two_lane	2	DF_001	0.000359842	0.0359842	0.558834	0	0.0557755	0.0413818	0.00359842	0.219144	0.0762864
487	23	2015	january	summer	2	14_01_2015	domestic	medium_mammals	Mammals	Carnivora	Felidae	Felis_catus	Gato_Domestico	5000	PNB	lane	1	12:45:00	181380	8272725	23L	sirgass_2000	12:56:00	1	removed	1	0	0	30.3	18	24.6	42.25	775	two_lane	2	DF_001	0	0.0515501	0.45602	0	0.105984	0.0760634	0	0.30137	0
488	23	2015	january	summer	2	14_01_2015	wild	small_birds	Birds	Passeriformes	NA	NA	Passeriforme	25	FAL	lane	1	14:50:00	188289	8231476	23L	sirgass_2000	14:57:00	1	removed	1	0	0	30.3	18	24.6	42.25	2000	two_lane	2	BR_251	0	0.0464029	0.877338	0	0.0165468	0.00971223	0	0.0413669	0
489	23	2015	january	summer	2	14_01_2015	wild	small_birds	Birds	Passeriformes	Emberizidae	Volatinia_jacariNA	Tiziu	10	FAL	lane	1	14:54:00	188307	8231483	23L	sirgass_2000	14:58:00	1	removed	1	0	0	30.3	18	24.6	42.25	2000	two_lane	2	BR_251	0	0.0465616	0.875716	0	0.0168338	0.0100287	0	0.0422636	0
490	23	2015	january	summer	2	14_01_2015	wild	small_birds	Birds	Passeriformes	Emberizidae	Volatinia_jacariNA	Tiziu	10	IBGE	lane	1	15:06:00	193197	8233950	23L	sirgass_2000	11:31:00	24	removed	1	1	0	30.3	18	24.6	42.25	2000	two_lane	2	BR_251	0	0.0927724	0.381158	0	0.0546566	0.0614887	0.00862999	0.372528	0.0158216
491	23	2015	january	summer	2	14_01_2015	wild	small_birds	Birds	Passeriformes	Emberizidae	Volatinia_jacariNA	Tiziu	10	JBB	shoulder	2	15:19:00	197595	8238506	23L	sirgass_2000	15:30:00	1	removed	1	0	0	30.3	18	24.6	42.25	7000	four_lane	3	DF_001	0	0.0907127	0.632829	0	0.0723542	0.0187185	0.0161987	0.149028	0
492	24	2015	february	summer	2	09_02_2015	wild	small_birds	Birds	Passeriformes	Emberizidae	Volatinia_jacariNA	Tiziu	10	JBB	lane	1	08:18:00	197924	8241125	23L	sirgass_2000	08:00:00	1	removed	1	0	1.2	25.6	17.4	21.06	77.75	7000	four_lane	3	DF_001	0.000358551	0.103621	0.409107	0	0.124417	0.0512729	0.138759	0.149516	0
493	24	2015	february	summer	2	09_02_2015	wild	small_birds	Birds	Passeriformes	Emberizidae	Volatinia_jacariNA	Tiziu	10	FAL	lane	1	09:05:00	183685	8231077	23L	sirgass_2000	10:02:00	96	remained	0	4	1.2	25.6	17.4	21.06	77.75	2000	two_lane	2	BR_251	0.000719942	0.0201584	0.74406	0	0.110511	0.0298776	0.0111591	0.0565155	0
494	24	2015	february	summer	2	09_02_2015	wild	small_birds	Birds	Passeriformes	Emberizidae	Volatinia_jacariNA	Tiziu	10	FAL	lane	1	09:08:00	183374	8231187	23L	sirgass_2000	10:07:00	48	removed	1	2	1.2	25.6	17.4	21.06	77.75	2000	two_lane	2	BR_251	0.000720461	0.0194524	0.73487	0	0.119236	0.0313401	0.0111671	0.0565562	0
495	24	2015	february	summer	2	09_02_2015	domestic	large_birds	Ave	Galliforme	Phasianidae	Gallus_gallus_domesticus	Galinha	1500	PNB	shoulder	2	09:52:00	173410	8253098	23L	sirgass_2000	09:58:00	1	removed	1	0	1.2	25.6	17.4	21.06	77.75	8000	two_lane	2	DF_001	0	0.120962	0.131371	0.178033	0.0366116	0.0750179	0.175879	0.244078	0.00789663
496	24	2015	february	summer	2	09_02_2015	wild	small_birds	Birds	Passeriformes	Emberizidae	Volatinia_jacariNA	Tiziu	10	PNB	lane	1	10:09:00	169061	8260690	23L	sirgass_2000	11:00:00	24	removed	1	1	1.2	25.6	17.4	21.06	77.75	775	two_lane	2	DF_001	0	0.0746858	0.306643	0.0201077	0.0696589	0.133573	0	0.321005	0.0570916
497	24	2015	february	summer	2	09_02_2015	wild	small_birds	Birds	Passeriformes	Emberizidae	Volatinia_jacariNA	Tiziu	10	PNB	shoulder	2	10:53:00	181634	8272515	23L	sirgass_2000	11:00:00	1	removed	1	0	1.2	25.6	17.4	21.06	77.75	775	two_lane	2	DF_001	0	0.0511159	0.449964	0	0.111951	0.0734341	0	0.304536	0
498	24	2015	february	summer	2	09_02_2015	wild	small_birds	Birds	Passeriformes	Emberizidae	Volatinia_jacariNA	Tiziu	10	PNB	lane	1	11:12:00	186328	8269034	23L	sirgass_2000	12:24:00	24	removed	1	1	1.2	25.6	17.4	21.06	77.75	775	two_lane	2	DF_001	0.000359842	0.0161929	0.47643	0	0.0600936	0.0453401	0	0.31882	0.0737675
499	24	2015	february	summer	2	09_02_2015	wild	small_birds	Birds	NA	NA	NA	Ave_silvestre	NA	PNB	lane	1	11:14:00	186427	8268962	23L	sirgass_2000	13:10:00	48	removed	1	2	1.2	25.6	17.4	21.06	77.75	775	two_lane	2	DF_001	0.000359454	0.0179727	0.479871	0	0.0611071	0.0445723	0	0.310208	0.0769231
500	24	2015	february	summer	2	09_02_2015	wild	small_birds	Birds	Passeriformes	Emberizidae	Volatinia_jacariNA	Tiziu	10	ESECAE	shoulder	2	12:30:00	212530	8274840	23L	sirgass_2000	13:36:00	1	removed	1	0	1.2	25.6	17.4	21.06	77.75	2600	two_lane	2	DF_128	0.0581897	0.315014	0.177443	0	0.0883621	0.00646552	0.115302	0.130388	0.079023
501	24	2015	february	summer	2	09_02_2015	wild	small_birds	Birds	Passeriformes	Emberizidae	Volatinia_jacariNA	Tiziu	10	ESECAE	lane	1	13:11:00	225775	8277949	23L	sirgass_2000	14:33:00	1	removed	1	0	1.2	25.6	17.4	21.06	77.75	951	two_lane	2	BR_010_DF_345	0	0.0154067	0.47474	0	0.0311716	0.0293802	0	0.41813	0
502	24	2015	february	summer	2	09_02_2015	wild	small_birds	Birds	Passeriformes	Emberizidae	Volatinia_jacariNA	Tiziu	10	ESECAE	shoulder	2	13:18:00	224261	8275897	23L	sirgass_2000	14:43:00	1	removed	1	0	1.2	25.6	17.4	21.06	77.75	951	two_lane	2	BR_010_DF_345	0	0.0144196	0.487022	0.00432588	0.00540735	0.000720981	0	0.450252	0
503	24	2015	february	summer	2	10_02_2015	wild	Large_reptiles	Reptile	Squamata	Colubridae	Mastigodryas_bifossatus	Jararacucu_do_brejo	250	JBB	shoulder	2	08:10:00	197484	8238298	23L	sirgass_2000	08:45:00	1	removed	1	0	0	27.4	18.8	21.94	79.25	7000	four_lane	3	DF_001	0	0.0940541	0.629189	0	0.0706306	0.0194595	0.0140541	0.151351	0
504	24	2015	february	summer	2	10_02_2015	wild	small_birds	Birds	Passeriformes	Emberizidae	Volatinia_jacariNA	Tiziu	10	JBB	lane	1	08:16:00	197567	8238459	23L	sirgass_2000	08:47:00	1	removed	1	0	0	27.4	18.8	21.94	79.25	7000	four_lane	3	DF_001	0	0.0901257	0.633034	0	0.0718133	0.0190305	0.0154399	0.15009	0
505	24	2015	february	summer	2	10_02_2015	wild	small_birds	Birds	Passeriformes	Emberizidae	Volatinia_jacariNA	Tiziu	10	JBB	shoulder	2	08:23:00	197940	8241220	23L	sirgass_2000	08:54:00	1	removed	1	0	0	27.4	18.8	21.94	79.25	7000	four_lane	3	DF_001	0.00036036	0.106667	0.393514	0	0.131171	0.0515315	0.141982	0.150631	0
506	24	2015	february	summer	2	10_02_2015	wild	small_birds	Birds	Passeriformes	Emberizidae	Volatinia_jacariNA	Tiziu	10	JBB	shoulder	2	08:29:00	196568	8236913	23L	sirgass_2000	08:59:00	1	removed	1	0	0	27.4	18.8	21.94	79.25	2000	two_lane	2	DF_001	0	0.0851064	0.598269	0	0.0382257	0.0140642	0.0897944	0.148576	0.0018031
507	24	2015	february	summer	2	10_02_2015	wild	small_birds	Birds	Passeriformes	Emberizidae	Volatinia_jacariNA	Tiziu	10	FAL	shoulder	2	08:45:00	189833	8232092	23L	sirgass_2000	09:15:00	1	removed	1	0	0	27.4	18.8	21.94	79.25	2000	two_lane	2	BR_251	0	0.0496939	0.700036	0	0.0388909	0.0342096	0	0.168887	0
508	24	2015	february	summer	2	10_02_2015	wild	large_birds	Birds	Strigiforme	Strigidae	Asio_clamator	Coruja_orelhuda	400	FAL	shoulder	2	08:48:00	189444	8231941	23L	sirgass_2000	09:17:00	1	removed	1	0	0	27.4	18.8	21.94	79.25	2000	two_lane	2	BR_251	0	0.0528207	0.747754	0	0.0362918	0.0215595	0	0.133309	0
509	24	2015	february	summer	2	10_02_2015	wild	small_birds	Birds	Passeriformes	Emberizidae	Volatinia_jacariNA	Tiziu	10	FAL	lane	1	08:50:00	189432	8231937	23L	sirgass_2000	09:55:00	72	removed	1	3	0	27.4	18.8	21.94	79.25	2000	two_lane	2	BR_251	0	0.0531991	0.748023	0	0.0363048	0.0212078	0	0.132998	0
510	24	2015	february	summer	2	10_02_2015	wild	small_birds	Birds	Passeriformes	NA	NA	Passeriforme	25	FAL	lane	1	08:57:00	187826	8231306	23L	sirgass_2000	09:25:00	1	removed	1	0	0	27.4	18.8	21.94	79.25	2000	two_lane	2	BR_251	0	0.0435565	0.909647	0	0.0136789	0.00683945	0	0.0176386	0
511	24	2015	february	summer	2	10_02_2015	wild	large_birds	Birds	Strigiforme	Strigidae	NA	Coruja	200	FAL	shoulder	2	09:15:00	182644	8231440	23L	sirgass_2000	10:05:00	72	removed	1	3	0	27.4	18.8	21.94	79.25	2000	two_lane	2	BR_251	0.000718649	0.0208408	0.706791	0	0.12217	0.0427596	0.0136543	0.0564139	0
512	24	2015	february	summer	2	10_02_2015	wild	small_birds	Birds	Passeriformes	NA	NA	Passeriforme	25	PNB	shoulder	2	10:03:00	173710	8254418	23L	sirgass_2000	10:42:00	1	removed	1	0	0	27.4	18.8	21.94	79.25	8000	two_lane	2	DF_001	0	0.103115	0.225922	0.163981	0.0415324	0.106337	0.0150376	0.323308	0.000358038
513	24	2015	february	summer	2	10_02_2015	wild	small_birds	Birds	Passeriformes	Emberizidae	Volatinia_jacariNA	Tiziu	10	PNB	lane	1	10:11:00	171653	8257666	23L	sirgass_2000	10:49:00	1	removed	1	0	0	27.4	18.8	21.94	79.25	8000	two_lane	2	DF_001	0	0.0255212	0.376707	0.232207	0.092739	0.233285	0	0.0283968	0
514	24	2015	february	summer	2	10_02_2015	wild	small_birds	Birds	Passeriformes	Emberizidae	Volatinia_jacariNA	Tiziu	10	PNB	lane	1	11:19:00	185825	8269407	23L	sirgass_2000	12:21:00	1	removed	1	0	0	27.4	18.8	21.94	79.25	775	two_lane	2	DF_001	0.000359971	0.0115191	0.446004	0	0.0611951	0.0557955	0	0.354572	0.0615551
515	24	2015	february	summer	2	10_02_2015	wild	small_birds	Birds	Passeriformes	Emberizidae	Volatinia_jacariNA	Tiziu	10	PNB	lane	1	11:34:00	192253	8264505	23L	sirgass_2000	12:41:00	1	removed	1	0	0	27.4	18.8	21.94	79.25	775	two_lane	2	DF_001	0.00108186	0.136314	0.366751	0	0.04652	0.163	0.172016	0.0616661	0.0238009
516	24	2015	february	summer	2	10_02_2015	domestic	Large_mammals	Mammals	Carnivora	Canidae	Canis_familiaris	Cachorro_Domestico	10000	PNB	shoulder	2	11:36:00	192305	8264460	23L	sirgass_2000	12:42:00	1	removed	1	0	0	27.4	18.8	21.94	79.25	775	two_lane	2	DF_001	0.000721241	0.13956	0.364226	0	0.0457988	0.160115	0.175261	0.0613054	0.0238009
517	24	2015	february	summer	2	10_02_2015	wild	small_reptiles	Reptile	Squamata	Teiidae	Ameiva_ameiva	Lagarto	22	ESECAE	lane	1	12:57:00	219917	8273830	23L	sirgass_2000	13:15:00	1	removed	1	0	0	27.4	18.8	21.94	79.25	5000	four_lane	3	BR_010_BR_020_BR_030	0	0.0247312	0.62724	0	0.0261649	0.000716846	0.0218638	0.278136	0
518	24	2015	february	summer	2	10_02_2015	wild	small_birds	Birds	Passeriformes	NA	NA	Passeriforme	25	ESECAE	lane	1	13:04:00	223204	8274874	23L	sirgass_2000	12:01:00	72	removed	1	3	0	27.4	18.8	21.94	79.25	5000	four_lane	3	BR_010_BR_020_BR_030	0	0.015043	0.457378	0.00501433	0.00537249	0.00143266	0	0.483524	0
519	24	2015	february	summer	2	10_02_2015	wild	small_reptiles	Reptile	Squamata	Dipsadidae	Philodryas_olfersii	Cobra_verde	150	ESECAE	lane	1	13:21:00	216311	8274024	23L	sirgass_2000	13:41:00	1	removed	1	0	0	27.4	18.8	21.94	79.25	5000	four_lane	3	BR_010_BR_020_BR_030	0	0.137585	0.463633	0	0.0745253	0.00143318	0.241849	0.0354712	0.0232891
520	24	2015	february	summer	2	10_02_2015	wild	large_birds	Birds	Strigiforme	Strigidae	NA	Coruja	200	ESECAE	lane	1	13:30:00	213584	8273981	23L	sirgass_2000	13:51:00	1	removed	1	0	0	27.4	18.8	21.94	79.25	5000	four_lane	3	BR_010_BR_020_BR_030	0.0270368	0.24982	0.203317	0	0.0789474	0.00865177	0.253064	0.105624	0.0403749
521	24	2015	february	summer	2	10_02_2015	wild	small_birds	Birds	Passeriformes	NA	NA	Passeriforme	25	ESECAE	lane	1	13:40:00	212539	8274999	23L	sirgass_2000	14:09:00	1	removed	1	0	0	27.4	18.8	21.94	79.25	2600	two_lane	2	DF_128	0.0582944	0.311263	0.184239	0	0.0860022	0.00647715	0.0985966	0.138539	0.0874415
522	24	2015	february	summer	2	10_02_2015	wild	small_birds	Birds	Passeriformes	NA	NA	Passeriforme	25	ESECAE	lane	1	13:42:00	212543	8275008	23L	sirgass_2000	14:46:00	24	removed	1	1	0	27.4	18.8	21.94	79.25	2600	two_lane	2	DF_128	0.0582734	0.311511	0.184892	0	0.0852518	0.00647482	0.0978417	0.139209	0.0874101
523	24	2015	february	summer	2	10_02_2015	wild	small_birds	Birds	Passeriformes	Emberizidae	Sporophila_caerulescens	Coleirinho	8	ESECAE	shoulder	2	13:49:00	212625	8275240	23L	sirgass_2000	14:12:00	1	removed	1	0	0	27.4	18.8	21.94	79.25	2600	two_lane	2	DF_128	0.0582524	0.306724	0.199928	0	0.0798274	0.00647249	0.0783891	0.140956	0.102122
524	24	2015	february	summer	2	10_02_2015	wild	small_birds	Birds	Passeriformes	Emberizidae	Volatinia_jacariNA	Tiziu	10	ESECAE	lane	1	13:49:00	213116	8275785	23L	sirgass_2000	14:51:00	24	removed	1	1	0	27.4	18.8	21.94	79.25	2600	two_lane	2	DF_128	0.0581479	0.264178	0.260948	0	0.0577889	0	0.0437904	0.141421	0.147523
525	24	2015	february	summer	2	10_02_2015	wild	small_birds	Birds	Passeriformes	Emberizidae	Volatinia_jacariNA	Tiziu	10	ESECAE	lane	1	13:49:00	213592	8276275	23L	sirgass_2000	14:17:00	1	removed	1	0	0	27.4	18.8	21.94	79.25	2600	two_lane	2	DF_128	0.0478073	0.219267	0.3156	0	0.042775	0.00143781	0.00359454	0.15133	0.193027
526	24	2015	february	summer	2	10_02_2015	wild	small_birds	Birds	Passeriformes	NA	NA	Passeriforme	25	ESECAE	lane	1	14:01:00	217489	8280287	23L	sirgass_2000	12:25:00	72	removed	1	3	0	27.4	18.8	21.94	79.25	2600	two_lane	2	DF_128	0	0.106039	0.478433	0	0.0341481	0.0262401	0	0.328541	0.0104242
527	24	2015	february	summer	2	10_02_2015	wild	small_birds	Birds	Passeriformes	NA	NA	Passeriforme	25	ESECAE	lane	1	14:04:00	217928	8280737	23L	sirgass_2000	14:36:00	1	removed	1	0	0	27.4	18.8	21.94	79.25	2600	two_lane	2	DF_128	0	0.105074	0.463476	0	0.0456999	0.0208708	0	0.347607	0.000359842
528	24	2015	february	summer	2	10_02_2015	wild	small_birds	Birds	Passeriformes	Emberizidae	Volatinia_jacariNA	Tiziu	10	ESECAE	shoulder	2	14:37:00	225054	8276972	23L	sirgass_2000	15:11:00	1	removed	1	0	0	27.4	18.8	21.94	79.25	951	two_lane	2	BR_010_DF_345	0	0.0161987	0.508639	0.00179986	0.0215983	0.011879	0	0.403528	0
529	24	2015	february	summer	2	10_02_2015	wild	small_birds	Birds	Passeriformes	Emberizidae	Volatinia_jacariNA	Tiziu	10	ESECAE	shoulder	2	14:39:00	224945	8276818	23L	sirgass_2000	15:12:00	1	removed	1	0	0	27.4	18.8	21.94	79.25	951	two_lane	2	BR_010_DF_345	0	0.0162104	0.506484	0.00252161	0.0205331	0.00864553	0	0.408501	0
530	24	2015	february	summer	2	11_02_2015	wild	medium_mammals	Mammals	Carnivora	Canidae	Pseudalopex_vetulus	Raposinha	3400	JBB	lane	1	08:37:00	197622	8238652	23L	sirgass_2000	09:44:00	48	removed	1	2	0.3	28.7	18.7	23.4	64	7000	four_lane	3	DF_001	0	0.0891445	0.635155	0	0.0729691	0.0179727	0.019051	0.145579	0
531	24	2015	february	summer	2	11_02_2015	wild	small_birds	Birds	Passeriformes	Emberizidae	Volatinia_jacariNA	Tiziu	10	FAL	lane	1	09:21:00	189204	8231850	23L	sirgass_2000	09:46:00	1	removed	1	0	0.3	28.7	18.7	23.4	64	2000	two_lane	2	BR_251	0	0.0539074	0.777496	0	0.0347323	0.01411	0	0.111433	0
532	24	2015	february	summer	2	11_02_2015	wild	small_birds	Birds	Galbuliforme	Bucconidae	Nystalus_chacuru	joao_bobo	64	PNB	shoulder	2	10:27:00	173334	8252912	23L	sirgass_2000	10:46:00	24	removed	1	1	0.3	28.7	18.7	23.4	64	8000	two_lane	2	DF_001	0	0.122434	0.124595	0.17717	0.0367303	0.0763414	0.204897	0.218581	0.00828232
533	24	2015	february	summer	2	11_02_2015	wild	small_birds	Birds	Passeriformes	Emberizidae	Volatinia_jacariNA	Tiziu	10	PNB	shoulder	2	10:32:00	173614	8253664	23L	sirgass_2000	11:12:00	1	removed	1	0	0.3	28.7	18.7	23.4	64	8000	two_lane	2	DF_001	0	0.116631	0.160187	0.169906	0.0338373	0.0921526	0.0950324	0.300576	0.00395968
534	24	2015	february	summer	2	11_02_2015	wild	small_birds	Birds	Passeriformes	Emberizidae	Volatinia_jacariNA	Tiziu	10	PNB	shoulder	2	10:40:00	173717	8254283	23L	sirgass_2000	10:49:00	48	removed	1	2	0.3	28.7	18.7	23.4	64	8000	two_lane	2	DF_001	0	0.10549	0.214568	0.162899	0.039469	0.103337	0.026193	0.325081	0.000717618
535	24	2015	february	summer	2	11_02_2015	wild	small_birds	Birds	Passeriformes	Emberizidae	Volatinia_jacariNA	Tiziu	10	PNB	shoulder	2	11:15:00	168851	8263149	23L	sirgass_2000	11:51:00	1	removed	1	0	0.3	28.7	18.7	23.4	64	775	two_lane	2	DF_001	0	0.0965196	0.386437	0	0.0430571	0.0936491	0	0.281306	0.0818084
536	24	2015	february	summer	2	11_02_2015	wild	small_birds	Birds	Passeriformes	Emberizidae	Volatinia_jacariNA	Tiziu	10	PNB	shoulder	2	11:15:00	168851	8263149	23L	sirgass_2000	11:51:00	1	removed	1	0	0.3	28.7	18.7	23.4	64	775	two_lane	2	DF_001	0	0.0965196	0.386437	0	0.0430571	0.0936491	0	0.281306	0.0818084
537	24	2015	february	summer	2	11_02_2015	wild	small_birds	Birds	Passeriformes	Emberizidae	Volatinia_jacariNA	Tiziu	10	PNB	lane	1	12:28:00	186525	8268890	23L	sirgass_2000	13:12:00	48	removed	1	2	0.3	28.7	18.7	23.4	64	775	two_lane	2	DF_001	0.000359195	0.0186782	0.486351	0	0.060704	0.0413075	0	0.306394	0.0775862
538	24	2015	february	summer	2	11_02_2015	wild	small_mammals	Mammals	Didelphimorphia	Didelphidae	Didelphis_albiventris	Gamba_ou_Sarue_	900	ESECAE	shoulder	2	13:49:00	213682	8274011	23L	sirgass_2000	14:35:00	48	removed	1	2	0.3	28.7	18.7	23.4	64	5000	four_lane	3	BR_010_BR_020_BR_030	0.0212536	0.248559	0.212536	0	0.0767291	0.00864553	0.256844	0.103746	0.0385447
539	24	2015	february	summer	2	11_02_2015	wild	large_birds	Birds	Strigiforme	Strigidae	NA	Coruja	200	ESECAE	shoulder	2	13:53:00	213502	8273947	23L	sirgass_2000	14:36:00	1	removed	1	0	0.3	28.7	18.7	23.4	64	5000	four_lane	3	BR_010_BR_020_BR_030	0.0291997	0.250901	0.197188	0	0.0796683	0.00865177	0.251983	0.107066	0.0421774
540	24	2015	february	summer	2	11_02_2015	wild	small_birds	Birds	Passeriformes	Emberizidae	Volatinia_jacariNA	Tiziu	10	ESECAE	shoulder	2	14:02:00	212904	8274053	23L	sirgass_2000	14:39:00	1	removed	1	0	0.3	28.7	18.7	23.4	64	2600	two_lane	2	DF_128	0.0575253	0.267728	0.17547	0	0.0886397	0.00832127	0.197902	0.106368	0.0647612
541	24	2015	february	summer	2	11_02_2015	wild	small_birds	Birds	Passeriformes	NA	NA	Passeriforme	25	ESECAE	lane	1	14:06:00	212843	8274153	23L	sirgass_2000	12:14:00	48	removed	1	2	0.3	28.7	18.7	23.4	64	2600	two_lane	2	DF_128	0.0580229	0.272564	0.176934	0	0.0920487	0.00752149	0.188754	0.105301	0.0662607
542	24	2015	february	summer	2	11_02_2015	wild	small_birds	Birds	Passeriformes	Emberizidae	Volatinia_jacariNA	Tiziu	10	ESECAE	shoulder	2	14:21:00	214990	8277716	23L	sirgass_2000	14:56:00	1	removed	1	0	0.3	28.7	18.7	23.4	64	2600	two_lane	2	DF_128	0	0.0744069	0.45399	0	0.038821	0.00323508	0	0.238318	0.18404
543	24	2015	february	summer	2	11_02_2015	wild	small_birds	Birds	Apodiforme	Trochilidae	NA	Beija_flor	8	ESECAE	lane	1	14:29:00	217265	8280055	23L	sirgass_2000	12:22:00	48	removed	1	2	0.3	28.7	18.7	23.4	64	2600	two_lane	2	DF_128	0	0.097307	0.48079	0	0.032675	0.0294434	0	0.317774	0.0254937
544	24	2015	february	summer	2	11_02_2015	wild	small_birds	Birds	Passeriformes	Emberizidae	Volatinia_jacariNA	Tiziu	10	ESECAE	lane	1	15:02:00	226879	8279440	23L	sirgass_2000	15:37:00	1	removed	1	0	0.3	28.7	18.7	23.4	64	951	two_lane	2	BR_010_DF_345	0	0.0190169	0.455687	0	0.0362397	0.0294223	0	0.437747	0
545	24	2015	february	summer	2	11_02_2015	wild	small_reptiles	Reptile	Squamata	Amphisbaenidae	AmphisbaeNA_alba	Cobra_de_duas_cabeças	25	ESECAE	shoulder	2	15:07:00	226165	8278476	23L	sirgass_2000	15:44:00	1	removed	1	0	0.3	28.7	18.7	23.4	64	951	two_lane	2	BR_010_DF_345	0	0.018005	0.467411	0	0.0349298	0.0295283	0	0.424559	0.000360101
546	25	2015	march	summer	2	16_03_2015	wild	small_birds	Birds	Passeriformes	Emberizidae	Volatinia_jacariNA	Tiziu	10	IBGE	lane	1	08:16:00	191331	8232684	23L	sirgass_2000	08:30:00	1	removed	1	0	0	27.1	17.6	20.78	76.75	2000	two_lane	2	BR_251	0	0.0561151	0.472302	0	0.0579137	0.0748201	0.00359712	0.325899	0
547	25	2015	march	summer	2	16_03_2015	wild	small_birds	Birds	Caprimulgiforme	Caprimulgidae	NA	Bacurau	45	FAL	lane	1	08:37:00	180598	8231471	23L	sirgass_2000	08:43:00	24	removed	1	1	0	27.1	17.6	20.78	76.75	2000	two_lane	2	BR_251	0.000718907	0.0301941	0.523724	0	0.0981308	0.170381	0.0686556	0.0564342	0
548	25	2015	march	summer	2	16_03_2015	wild	small_birds	Birds	Passeriformes	Emberizidae	Volatinia_jacariNA	Tiziu	10	PNB	lane	1	09:27:00	173280	8256253	23L	sirgass_2000	09:30:00	1	removed	1	0	0	27.1	17.6	20.78	76.75	8000	two_lane	2	DF_001	0	0.0325931	0.385029	0.171203	0.0651862	0.149355	0	0.18553	0
549	25	2015	march	summer	2	16_03_2015	wild	small_birds	Birds	Apodiforme	Trochilidae	NA	Beija_flor	8	PNB	lane	1	09:50:00	169083	8260438	23L	sirgass_2000	09:42:00	1	removed	1	0	0	27.1	17.6	20.78	76.75	775	two_lane	2	DF_001	0	0.0709677	0.29319	0.0419355	0.0648746	0.133333	0	0.321147	0.0569892
550	25	2015	march	summer	2	16_03_2015	wild	small_birds	Birds	Passeriformes	NA	NA	Passeriforme	25	PNB	lane	1	10:30:00	181499	8272619	23L	sirgass_2000	10:23:00	1	removed	1	0	0	27.1	17.6	20.78	76.75	775	two_lane	2	DF_001	0	0.0513465	0.452783	0	0.109515	0.0754039	0	0.301616	0
551	25	2015	march	summer	2	16_03_2015	wild	small_birds	Birds	Passeriformes	NA	NA	Passeriforme	25	PNB	lane	1	10:33:00	181642	8272510	23L	sirgass_2000	10:24:00	1	removed	1	0	0	27.1	17.6	20.78	76.75	775	two_lane	2	DF_001	0	0.0508842	0.447492	0	0.112595	0.0743414	0	0.305666	0
552	25	2015	march	summer	2	16_03_2015	wild	small_birds	Birds	Passeriformes	Emberizidae	Volatinia_jacariNA	Tiziu	10	PNB	lane	1	10:37:00	181946	8272280	23L	sirgass_2000	10:19:00	24	removed	1	1	0	27.1	17.6	20.78	76.75	775	two_lane	2	DF_001	0	0.0436508	0.446609	0	0.116522	0.0732323	0	0.310967	0
553	25	2015	march	summer	2	16_03_2015	domestic	medium_mammals	Mammals	Carnivora	Felidae	Felis_catus	Gato_Domestico	5000	ESECAE	shoulder	2	11:30:00	221512	8274345	23L	sirgass_2000	11:15:00	96	remained	0	4	0	27.1	17.6	20.78	76.75	5000	four_lane	3	BR_010_BR_020_BR_030	0	0.018759	0.549423	0.00324675	0.0212843	0.001443	0	0.375902	0
554	25	2015	march	summer	2	16_03_2015	wild	small_mammals	Mammals	Primates	Cebidae	Callithrix_penicillata	Sagui	400	ESECAE	lane	1	11:44:00	221691	8274433	23L	sirgass_2000	11:30:00	1	removed	1	0	0	27.1	17.6	20.78	76.75	5000	four_lane	3	BR_010_BR_020_BR_030	0	0.0187118	0.54444	0.00323858	0.0197913	0.00143937	0	0.381792	0
555	25	2015	march	summer	2	16_03_2015	wild	Large_reptiles	Reptile	Squamata	Boidae	Boa_constrictor	Jiboia	4000	ESECAE	shoulder	2	11:50:00	219012	8273803	23L	sirgass_2000	11:25:00	96	remained	0	4	0	27.1	17.6	20.78	76.75	5000	four_lane	3	BR_010_BR_020_BR_030	0	0.0575126	0.617541	0	0.0298347	0	0.0790798	0.194464	0
556	25	2015	march	summer	2	17_03_2015	wild	small_birds	Birds	Passeriformes	Emberizidae	Volatinia_jacariNA	Tiziu	10	JBB	lane	1	07:59:00	198062	8240206	23L	sirgass_2000	07:54:00	1	removed	1	0	0	23.9	17.1	20.12	82.25	7000	four_lane	3	DF_001	0	0.0843243	0.528288	0	0.0565766	0.0378378	0.109189	0.161802	0
557	25	2015	march	summer	2	17_03_2015	wild	small_birds	Birds	Cuculiforme	Cuculidae	Crotophaga_ani	Anu_preto	100	PNB	lane	1	09:53:00	169260	8266179	23L	sirgass_2000	09:46:00	1	removed	1	0	0	23.9	17.1	20.12	82.25	775	dirt_road	1	DF_001	0	0.0478934	0.304285	0	0.0277278	0.202017	0	0.253871	0.147641
558	25	2015	march	summer	2	17_03_2015	wild	small_birds	Birds	Passeriformes	Emberizidae	Volatinia_jacariNA	Tiziu	10	PNB	lane	1	10:16:00	178652	8274785	23L	sirgass_2000	10:12:00	1	removed	1	0	0	23.9	17.1	20.12	82.25	775	two_lane	2	DF_001	0	0.0769784	0.373022	0	0.0661871	0.0467626	0	0.402518	0.0230216
559	25	2015	march	summer	2	17_03_2015	wild	small_reptiles	Reptile	Squamata	Amphisbaenidae	AmphisbaeNA_alba	Cobra_de_duas_cabeças	25	ESECAE	lane	1	11:53:00	212571	8274636	23L	sirgass_2000	11:44:00	1	removed	1	0	0	23.9	17.1	20.12	82.25	2600	two_lane	2	DF_128	0.0581897	0.312859	0.174928	0	0.090158	0.00646552	0.137931	0.12033	0.0686063
560	25	2015	march	summer	2	17_03_2015	wild	small_birds	Birds	Passeriformes	Emberizidae	Volatinia_jacariNA	Tiziu	10	ESECAE	shoulder	2	12:40:00	225231	8277186	23L	sirgass_2000	12:30:00	1	removed	1	0	0	23.9	17.1	20.12	82.25	951	two_lane	2	BR_010_DF_345	0	0.0161871	0.505396	0.000719424	0.0244604	0.0179856	0	0.4	0
561	25	2015	march	summer	2	18_03_2015	wild	small_birds	Birds	Passeriformes	NA	NA	Passeriforme	25	IBGE	lane	1	08:24:00	191134	8232603	23L	sirgass_2000	09:14:00	1	removed	1	0	18.1	24.6	17.5	19.96	81	2000	two_lane	2	BR_251	0	0.0572767	0.503963	0	0.0536744	0.0724063	0.00288184	0.300432	0
562	25	2015	march	summer	2	18_03_2015	wild	small_birds	Birds	Passeriformes	Emberizidae	Volatinia_jacariNA	Tiziu	10	PNB	shoulder	2	09:27:00	171932	8257585	23L	sirgass_2000	10:34:00	1	removed	1	0	18.1	24.6	17.5	19.96	81	8000	two_lane	2	DF_001	0	0.0259086	0.398705	0.215905	0.0942785	0.22778	0	0.0269881	0
563	25	2015	march	summer	2	18_03_2015	wild	small_birds	Birds	Passeriformes	NA	NA	Passeriforme	25	PNB	lane	1	09:32:00	169658	8258378	23L	sirgass_2000	10:40:00	1	removed	1	0	18.1	24.6	17.5	19.96	81	775	two_lane	2	DF_001	0	0.0255672	0.21606	0.290241	0.0777818	0.148722	0	0.175729	0.0532949
564	25	2015	march	summer	2	18_03_2015	wild	small_birds	Birds	Passeriformes	Emberizidae	Volatinia_jacariNA	Tiziu	10	ESECAE	lane	1	11:42:00	212725	8275385	23L	sirgass_2000	14:03:00	1	removed	1	0	18.1	24.6	17.5	19.96	81	2600	two_lane	2	DF_128	0.0582106	0.301473	0.212361	0	0.0707869	0.00646784	0.0711462	0.140855	0.11175
565	25	2015	march	summer	2	18_03_2015	domestic	Large_mammals	Mammals	Carnivora	Canidae	Canis_familiaris	Cachorro_Domestico	10000	ESECAE	shoulder	2	11:52:00	215646	8278382	23L	sirgass_2000	11:34:00	48	removed	1	2	18.1	24.6	17.5	19.96	81	2600	two_lane	2	DF_128	0	0.0735665	0.469167	0	0.0338983	0.00793365	0	0.245222	0.163
566	26	2015	april	autumn	3	06_04_2015	wild	large_birds	Birds	Strigiforme	Tytonidae	Tyto_alba	Suindara	500	FAL	shoulder	2	08:23:00	184576	8230768	23L	sirgass_2000	08:21:00	1	removed	1	0	23.2	27.6	18.2	22.84	70.5	2000	two_lane	2	BR_251	0.000718391	0.0233477	0.779095	0	0.101652	0.0204741	0.00287356	0.0488506	0
567	26	2015	april	autumn	3	06_04_2015	wild	small_birds	Birds	Passeriformes	NA	NA	Passeriforme	25	PNB	lane	1	09:16:00	173261	8252727	23L	sirgass_2000	09:05:00	48	removed	1	2	23.2	27.6	18.2	22.84	70.5	8000	two_lane	2	DF_001	0	0.123964	0.117838	0.175135	0.0371171	0.0781982	0.232432	0.195676	0.00864865
568	26	2015	april	autumn	3	06_04_2015	wild	small_birds	Birds	Passeriformes	Emberizidae	Volatinia_jacariNA	Tiziu	10	PNB	lane	1	09:29:00	171652	8257664	23L	sirgass_2000	09:21:00	1	removed	1	0	23.2	27.6	18.2	22.84	70.5	8000	two_lane	2	DF_001	0	0.0255212	0.376707	0.232566	0.092739	0.232926	0	0.0283968	0
569	26	2015	april	autumn	3	06_04_2015	wild	small_birds	Birds	Passeriformes	Emberizidae	Volatinia_jacariNA	Tiziu	10	PNB	lane	1	09:32:00	171494	8257692	23L	sirgass_2000	09:15:00	48	removed	1	2	23.2	27.6	18.2	22.84	70.5	8000	two_lane	2	DF_001	0	0.0251437	0.363506	0.244971	0.0923132	0.230963	0	0.03125	0.000359195
570	26	2015	april	autumn	3	06_04_2015	wild	small_birds	Birds	Passeriformes	Emberizidae	Volatinia_jacariNA	Tiziu	10	PNB	shoulder	2	09:37:00	170750	8257800	23L	sirgass_2000	09:24:00	1	removed	1	0	23.2	27.6	18.2	22.84	70.5	8000	two_lane	2	DF_001	0	0.0223022	0.280935	0.302878	0.0877698	0.217986	0	0.0629496	0.0140288
571	26	2015	april	autumn	3	06_04_2015	wild	small_reptiles	Reptile	Squamata	Dipsadidae	Philodryas_patagoniensis	Cobra_cipo	150	PNB	lane	1	09:54:00	169204	8265962	23L	sirgass_2000	09:39:00	1	removed	1	0	23.2	27.6	18.2	22.84	70.5	775	dirt_road	1	DF_001	0	0.0507925	0.308718	0	0.0298991	0.195245	0	0.25072	0.147695
572	26	2015	april	autumn	3	06_04_2015	wild	small_birds	Birds	Passeriformes	Emberizidae	Volatinia_jacariNA	Tiziu	10	PNB	lane	1	10:11:00	174699	8273167	23L	sirgass_2000	09:57:00	1	removed	1	0	23.2	27.6	18.2	22.84	70.5	775	dirt_road	1	DF_001	0	0.0704782	0.380079	0	0.0816253	0.294139	0	0.0535778	0.110392
573	26	2015	april	autumn	3	06_04_2015	domestic	large_birds	Ave	Galliforme	Phasianidae	Gallus_gallus_domesticus	Galinha	1500	PNB	lane	1	10:16:00	175329	8273952	23L	sirgass_2000	09:54:00	48	removed	1	2	23.2	27.6	18.2	22.84	70.5	775	dirt_road	1	DF_001	0	0.0674803	0.348528	0	0.0793252	0.238693	0	0.122398	0.13173
574	26	2015	april	autumn	3	06_04_2015	wild	Large_reptiles	Reptile	Squamata	Viperidae	Crotalus_durissus	Cascavel	550	PNB	lane	1	10:20:00	176939	8275371	23L	sirgass_2000	09:58:00	24	removed	1	1	23.2	27.6	18.2	22.84	70.5	775	two_lane	2	DF_001	0	0.0513465	0.295512	0	0.0560144	0.0929982	0	0.371275	0.121005
575	26	2015	april	autumn	3	06_04_2015	wild	small_birds	Birds	Passeriformes	NA	NA	Passeriforme	25	PNB	lane	1	10:44:00	184896	8270088	23L	sirgass_2000	10:28:00	1	removed	1	0	23.2	27.6	18.2	22.84	70.5	775	two_lane	2	DF_001	0	0.00646552	0.41954	0	0.0908764	0.0689655	0	0.381825	0.0233477
576	26	2015	april	autumn	3	06_04_2015	domestic	large_birds	Ave	Galliforme	Phasianidae	Gallus_gallus_domesticus	Galinha	1500	ESECAE	shoulder	2	12:00:00	222201	8274593	23L	sirgass_2000	07:53:00	96	remained	0	4	23.2	27.6	18.2	22.84	70.5	5000	four_lane	3	BR_010_BR_020_BR_030	0	0.0154454	0.516882	0.00502874	0.0140086	0.00179598	0	0.415589	0
577	26	2015	april	autumn	3	06_04_2015	wild	small_reptiles	Reptile	Squamata	Amphisbaenidae	AmphisbaeNA_alba	Cobra_de_duas_cabeças	25	ESECAE	lane	1	12:18:00	217263	8273947	23L	sirgass_2000	07:58:00	72	removed	1	3	23.2	27.6	18.2	22.84	70.5	5000	four_lane	3	BR_010_BR_020_BR_030	0	0.108477	0.529095	0	0.0456178	0	0.209052	0.0632184	0.0229885
578	26	2015	april	autumn	3	06_04_2015	domestic	Large_mammals	Mammals	Carnivora	Canidae	Canis_familiaris	Cachorro_Domestico	10000	ESECAE	lane	1	12:33:00	214050	8276744	23L	sirgass_2000	08:11:00	96	remained	0	4	23.2	27.6	18.2	22.84	70.5	2600	two_lane	2	DF_128	0.0247845	0.16092	0.372126	0	0.0391523	0.00215517	0	0.157328	0.221624
579	26	2015	april	autumn	3	06_04_2015	wild	small_mammals	Mammals	Rodentia	Cricetidae	NA	Rato_silvestre	NA	ESECAE	lane	1	13:10:00	226348	8278718	23L	sirgass_2000	13:02:00	1	removed	1	0	23.2	27.6	18.2	22.84	70.5	951	two_lane	2	BR_010_DF_345	0	0.0183916	0.462676	0	0.0396682	0.0295709	0	0.430581	0
580	26	2015	april	autumn	3	07_04_2015	wild	small_birds	Birds	Passeriformes	NA	NA	Passeriforme	25	FAL	lane	1	08:14:00	186835	8230914	23L	sirgass_2000	08:11:00	24	removed	1	1	0	27.6	19.3	22.78	77.5	2000	two_lane	2	BR_251	0	0.0277278	0.92906	0	0.0273677	0.00684192	0	0	0
581	26	2015	april	autumn	3	07_04_2015	wild	small_birds	Birds	Passeriformes	Emberizidae	Volatinia_jacariNA	Tiziu	10	PNB	lane	1	09:08:00	173337	8256124	23L	sirgass_2000	09:02:00	1	removed	1	0	0	27.6	19.3	22.78	77.5	8000	two_lane	2	DF_001	0	0.0338861	0.378154	0.169791	0.0623648	0.140231	0	0.204398	0
582	26	2015	april	autumn	3	07_04_2015	wild	small_birds	Birds	Passeriformes	Emberizidae	Volatinia_jacariNA	Tiziu	10	PNB	lane	1	09:16:00	172888	8256931	23L	sirgass_2000	09:04:00	1	removed	1	0	0	27.6	19.3	22.78	77.5	8000	two_lane	2	DF_001	0	0.0233729	0.43941	0.173319	0.0704782	0.183387	0	0.100324	0
583	26	2015	april	autumn	3	07_04_2015	wild	small_birds	Birds	Passeriformes	Emberizidae	Volatinia_jacariNA	Tiziu	10	ESECAE	lane	1	11:40:00	216193	8273997	23L	sirgass_2000	10:54:00	1	removed	1	0	0	27.6	19.3	22.78	77.5	5000	four_lane	3	BR_010_BR_020_BR_030	0	0.136789	0.457523	0	0.0741541	0.00179986	0.24838	0.0352772	0.0233981
584	26	2015	april	autumn	3	07_04_2015	wild	small_reptiles	Reptile	Squamata	Teiidae	Ameiva_ameiva	Lagarto	22	ESECAE	shoulder	2	11:23:00	214472	8277183	23L	sirgass_2000	08:15:00	48	removed	1	2	0	27.6	19.3	22.78	77.5	2600	two_lane	2	DF_128	0.00396682	0.115759	0.417598	0	0.0436351	0.00216372	0	0.179589	0.223945
585	26	2015	april	autumn	3	07_04_2015	wild	small_reptiles	Reptile	Squamata	Amphisbaenidae	AmphisbaeNA_alba	Cobra_de_duas_cabeças	25	ESECAE	shoulder	2	12:32:00	216772	8279517	23L	sirgass_2000	12:23:00	1	removed	1	0	0	27.6	19.3	22.78	77.5	2600	two_lane	2	DF_128	0	0.0800288	0.48522	0	0.0328046	0.0288392	0	0.281903	0.074982
586	26	2015	april	autumn	3	07_04_2015	domestic	Large_mammals	Mammals	Carnivora	Canidae	Canis_familiaris	Cachorro_Domestico	10000	ESECAE	lane	1	13:25:00	216148	8274035	23L	sirgass_2000	08:01:00	72	removed	1	3	0	27.6	19.3	22.78	77.5	5000	four_lane	3	BR_010_BR_020_BR_030	0	0.137262	0.464247	0	0.0733022	0.00179662	0.244341	0.0330579	0.0233561
587	26	2015	april	autumn	3	08_04_2015	wild	small_birds	Birds	Passeriformes	Emberizidae	Volatinia_jacariNA	Tiziu	10	PNB	lane	1	10:22:00	188708	8267283	23L	sirgass_2000	10:33:00	1	removed	1	0	18.8	25.6	19.3	21.26	87.5	775	two_lane	2	DF_001	0.000716076	0.0547798	0.623344	0	0.0583602	0.0920158	0.0075188	0.107769	0.0461869
588	26	2015	april	autumn	3	08_04_2015	wild	small_birds	Birds	Passeriformes	Mimidae	Mimus_saturninus	Sabia_do_campo	73	ESECAE	lane	1	11:09:00	223917	8275129	23L	sirgass_2000	11:16:00	1	removed	1	0	18.8	25.6	19.3	21.26	87.5	5000	four_lane	3	BR_010_BR_020_BR_030	0	0.0168398	0.418488	0.00429953	0.00537442	0.000716589	0	0.517019	0
589	26	2015	april	autumn	3	08_04_2015	domestic	Large_mammals	Mammals	Carnivora	Canidae	Canis_familiaris	Cachorro_Domestico	10000	ESECAE	lane	1	11:28:00	215615	8274042	23L	sirgass_2000	08:04:00	48	removed	1	2	18.8	25.6	19.3	21.26	87.5	5000	four_lane	3	BR_010_BR_020_BR_030	0	0.139359	0.455888	0	0.0709399	0.00396111	0.25063	0.0291682	0.0234066
590	26	2015	april	autumn	3	08_04_2015	wild	small_mammals	Mammals	Didelphimorphia	Didelphidae	Didelphis_albiventris	Gamba_ou_Sarue_	900	ESECAE	shoulder	2	12:27:00	217866	8280673	23L	sirgass_2000	11:51:00	1	removed	1	0	18.8	25.6	19.3	21.26	87.5	2600	two_lane	2	DF_128	0	0.105793	0.465275	0	0.0435408	0.0208708	0	0.346528	0.00107953

## Sheet: Persistence - Buffer_4km
ID	survey	year	month	season_name	season_cod	data	wild_domestic	functional_group	class	order	family	species	common_name	body_mass	site	position	posic	hour_of_first_record	x	y	utm_zone	datum	hour_of_last_record	removal_time_hours	status_name	status	n_days	rainy	max_temperature	min_temperature	mean_temperature	humidity	traffic	road_type	road_type_cod	road	water	others	savannah	reforestation	forest	anthropic_vegetation	urban	agriculture	grasslands_pasture
1	1	2013	march	summer	2	11_03_2013	wild	small_reptiles	Reptile	Squamata	Amphisbaenidae	Amphisbaena_alba	Cobra_de_duas_cabeças	25	ESECAE	shoulder	2	08:10:00	217565	8273890	23L	sirgass_2000	08:12:00	1	removed	1	0	0.2	28.8	19.5	23.62	75.75	5000	four_lane	3	BR_010_BR_020_BR_030	0	0.0940534	0.513956	0	0.0527913	0.00606796	0.167071	0.136731	0.0131472
2	1	2013	march	summer	2	11_03_2013	wild	small_reptiles	Reptile	Squamata	Amphisbaenidae	Amphisbaena_alba	Cobra_de_duas_cabeças	25	ESECAE	shoulder	2	08:22:00	220298	8273950	23L	sirgass_2000	08:35:00	24	removed	1	1	0.2	28.8	19.5	23.62	75.75	5000	four_lane	3	BR_010_BR_020_BR_030	0	0.0342521	0.592825	0.00608026	0.0229023	0.00182408	0.0340495	0.28638	0
3	1	2013	march	summer	2	11_03_2013	wild	small_birds	Birds	Passeriformes	NA	NA	Passeriforme	25	ESECAE	shoulder	2	09:08:00	217702	8280504	23L	sirgass_2000	09:29:00	48	removed	1	2	0.2	28.8	19.5	23.62	75.75	2600	two_lane	2	DF_128	0.000202265	0.124595	0.473503	0	0.0788835	0.0182039	0	0.254652	0.0374191
4	1	2013	march	summer	2	11_03_2013	wild	small_birds	Birds	Passeriformes	Emberizidae	Volatinia_jacarina	Tiziu	10	ESECAE	shoulder	2	09:31:00	228461	8282509	23L	sirgass_2000	09:50:00	1	removed	1	0	0.2	28.8	19.5	23.62	75.75	951	two_lane	2	BR_010_DF_345	0	0.0381697	0.211712	0	0.0184922	0.0163585	0	0.669986	0
5	1	2013	march	summer	2	11_03_2013	wild	Large_mammals	Mammals	Carnivora	Canidae	Cerdocyon_thous	Cachorro_do_mato	5700	ESECAE	lane	1	09:42:00	224383	8276059	23L	sirgass_2000	10:05:00	1	removed	1	0	0.2	28.8	19.5	23.62	75.75	951	two_lane	2	BR_010_DF_345	0	0.0209974	0.472441	0.0131234	0.0209974	0.00646073	0	0.437311	0
6	1	2013	march	summer	2	11_03_2013	wild	small_birds	Birds	Passeriformes	Emberizidae	Volatinia_jacarina	Tiziu	10	ESECAE	shoulder	2	10:15:00	191092	8265516	23L	sirgass_2000	10:42:00	1	removed	1	0	0.2	28.8	19.5	23.62	75.75	775	two_lane	2	DF_001	0.000606306	0.106103	0.448666	0	0.0561843	0.205335	0.0962005	0.053557	0.0163703
7	1	2013	march	summer	2	12_03_2013	wild	large_birds	Birds	Charadriiformes	Charadriidae	Vanellus_chilensis	Quero_quero	300	ESECAE	shoulder	2	08:17:00	218933	8273755	23L	sirgass_2000	07:53:00	72	removed	1	3	1.1	30.4	19	24.56	67.5	5000	four_lane	3	BR_010_BR_020_BR_030	0	0.0556901	0.535916	0	0.0306699	0.00504439	0.113801	0.230831	0.00968523
8	1	2013	march	summer	2	12_03_2013	wild	small_birds	Birds	Passeriformes	Emberizidae	Volatinia_jacarina	Tiziu	10	ESECAE	shoulder	2	08:33:00	223553	8275016	23L	sirgass_2000	08:25:00	72	removed	1	3	1.1	30.4	19	24.56	67.5	5000	four_lane	3	BR_010_BR_020_BR_030	0	0.0250961	0.487148	0.0174054	0.0113337	0.00161911	0	0.429265	0
9	1	2013	march	summer	2	12_03_2013	wild	small_birds	Birds	Passeriformes	Emberizidae	Volatinia_jacarina	Tiziu	10	ESECAE	lane	1	09:55:00	228045	8281110	23L	sirgass_2000	09:55:00	1	removed	1	0	1.1	30.4	19	24.56	67.5	951	two_lane	2	BR_010_DF_345	0	0.0340886	0.254542	0	0.0306185	0.0220453	0	0.623801	0.00102062
10	1	2013	march	summer	2	12_03_2013	wild	small_birds	Birds	Passeriformes	Emberizidae	Volatinia_jacarina	Tiziu	10	PNB	lane	1	10:33:00	192490	8264315	23L	sirgass_2000	11:04:00	1	removed	1	0	1.1	30.4	19	24.56	67.5	775	two_lane	2	DF_001	0.00101092	0.183785	0.328751	0	0.0580267	0.176102	0.169025	0.0398302	0.0133441
11	1	2013	march	summer	2	12_03_2013	wild	small_birds	Birds	Passeriformes	NA	NA	Passeriforme	25	PNB	lane	1	10:55:00	184506	8270385	23L	sirgass_2000	11:00:00	72	removed	1	3	1.1	30.4	19	24.56	67.5	775	two_lane	2	DF_001	0.000201735	0.0119024	0.41517	0	0.0899738	0.143837	0	0.300989	0.0312689
12	1	2013	march	summer	2	12_03_2013	wild	small_reptiles	Reptile	Squamata	Dipsadidae	Philodryas_sp	Cobra_cipo	150	PNB	lane	1	10:57:00	184515	8270378	23L	sirgass_2000	11:20:00	1	removed	1	0	1.1	30.4	19	24.56	67.5	775	two_lane	2	DF_001	0.000201857	0.0117077	0.414816	0	0.0900283	0.144126	0	0.301171	0.0312878
13	1	2013	march	summer	2	12_03_2013	wild	small_birds	Birds	Passeriformes	Emberizidae	Volatinia_jacarina	Tiziu	10	PNB	lane	1	11:23:00	183110	8271409	23L	sirgass_2000	11:00:00	24	removed	1	1	1.1	30.4	19	24.56	67.5	775	two_lane	2	DF_001	0	0.0222177	0.451626	0	0.0991719	0.13775	0	0.282771	0
14	1	2013	march	summer	2	12_03_2013	wild	small_birds	Birds	Passeriformes	Emberizidae	Volatinia_jacarina	Tiziu	10	PNB	lane	1	11:32:00	179366	8274255	23L	sirgass_2000	11:57:00	1	removed	1	0	1.1	30.4	19	24.56	67.5	775	two_lane	2	DF_001	0	0.0541414	0.430505	0	0.0771717	0.106869	0	0.301818	0.0216162
15	1	2013	march	summer	2	12_03_2013	domestic	medium_mammals	Mammals	Carnivora	Felidae	Felis_catus	Gato_Domestico	5000	PNB	lane	1	12:04:00	169619	8258405	23L	sirgass_2000	12:37:00	1	removed	1	0	1.1	30.4	19	24.56	67.5	775	two_lane	2	DF_001	0	0.0333603	0.22867	0.235948	0.0663162	0.171654	0	0.220178	0.0331581
16	1	2013	march	summer	2	12_03_2013	wild	small_birds	Birds	Passeriformes	Emberizidae	Volatinia_jacarina	Tiziu	10	PNB	shoulder	2	12:08:00	170314	8257923	23L	sirgass_2000	11:57:00	24	removed	1	1	1.1	30.4	19	24.56	67.5	8000	two_lane	2	BR_080	0	0.0230117	0.272305	0.265442	0.0700444	0.194792	0	0.133428	0.0312878
17	1	2013	march	summer	2	12_03_2013	wild	small_mammals	Mammals	Chiroptera	Mormoopidae	Pteronotus_sp	Morcego	20	PNB	shoulder	2	12:15:00	173081	8256646	23L	sirgass_2000	12:53:00	1	removed	1	0	1.1	30.4	19	24.56	67.5	8000	two_lane	2	DF_001	0	0.0292693	0.354461	0.190957	0.0686314	0.186516	0	0.161284	0
18	1	2013	march	summer	2	12_03_2013	wild	small_birds	Birds	Passeriformes	Emberizidae	Volatinia_jacarina	Tiziu	10	PNB	shoulder	2	12:18:00	173132	8256558	23L	sirgass_2000	10:35:00	48	removed	1	2	1.1	30.4	19	24.56	67.5	8000	two_lane	2	DF_001	0	0.0308841	0.352039	0.190351	0.0666128	0.18147	0	0.169762	0
19	1	2013	march	summer	2	12_03_2013	wild	small_birds	Birds	Cuculiforme	Cuculidae	Crotophaga_ani	Anu_preto	100	PNB	shoulder	2	12:25:00	173706	8254708	23L	sirgass_2000	13:08:00	1	removed	1	0	1.1	30.4	19	24.56	67.5	8000	two_lane	2	DF_001	0	0.0798141	0.227925	0.189533	0.0493029	0.118004	0.0571833	0.254193	0.0036371
20	1	2013	march	summer	2	13_03_2013	wild	small_reptiles	Reptile	Squamata	Amphisbaenidae	Amphisbaena_alba	Cobra_de_duas_cabeças	25	ESECAE	lane	1	08:08:00	215811	8274026	23L	sirgass_2000	07:53:00	1	removed	1	0	0	30.5	19.3	23.2	80.75	5000	four_lane	3	BR_010_BR_020_BR_030	0	0.124874	0.430906	0	0.0544684	0.00665725	0.228767	0.107726	0.022796
21	1	2013	march	summer	2	13_03_2013	wild	small_reptiles	Reptile	Squamata	Dipsadidae	Sibynomorphus_mikanii	Jararaquinha_dormideira	150	ESECAE	shoulder	2	08:42:00	223036	8274819	23L	sirgass_2000	08:38:00	48	removed	1	2	0	30.5	19.3	23.2	80.75	5000	four_lane	3	BR_010_BR_020_BR_030	0	0.0241037	0.519951	0.0111404	0.0151914	0.00121531	0	0.401256	0
22	1	2013	march	summer	2	13_03_2013	wild	small_birds	Birds	Passeriformes	Emberizidae	Volatinia_jacarina	Tiziu	10	ESECAE	shoulder	2	09:10:00	221894	8274495	23L	sirgass_2000	08:50:00	48	removed	1	2	0	30.5	19.3	23.2	80.75	5000	four_lane	3	BR_010_BR_020_BR_030	0	0.0268741	0.5882	0.00606183	0.020004	0.00101031	0	0.334007	0
23	1	2013	march	summer	2	13_03_2013	wild	small_reptiles	Reptile	Squamata	Dipsadidae	Oxyrhopus_guibei	Coral_falsa	80	ESECAE	shoulder	2	08:25:00	218936	8273808	23L	sirgass_2000	08:50:00	1	removed	1	0	0	30.5	19.3	23.2	80.75	5000	four_lane	3	BR_010_BR_020_BR_030	0	0.0554431	0.541481	0	0.0307568	0.00526103	0.1121	0.227034	0.00971267
24	1	2013	march	summer	2	13_03_2013	wild	small_reptiles	Reptile	Squamata	Amphisbaenidae	Amphisbaena_alba	Cobra_de_duas_cabeças	25	ESECAE	shoulder	2	09:28:00	217954	8273888	23L	sirgass_2000	08:54:00	1	removed	1	0	0	30.5	19.3	23.2	80.75	5000	four_lane	3	BR_010_BR_020_BR_030	0	0.0930609	0.518916	0	0.0432935	0.00505766	0.152539	0.158001	0.0131499
25	1	2013	march	summer	2	13_03_2013	wild	small_birds	Birds	Passeriformes	Emberizidae	Volatinia_jacarina	Tiziu	10	ESECAE	lane	1	10:35:00	224254	8275879	23L	sirgass_2000	10:04:00	1	removed	1	0	0	30.5	19.3	23.2	80.75	951	two_lane	2	BR_010_DF_345	0	0.0218491	0.468339	0.015173	0.0184099	0.00404613	0	0.443253	0
26	1	2013	march	summer	2	13_03_2013	wild	small_birds	Birds	Passeriformes	Emberizidae	Volatinia_jacarina	Tiziu	10	PNB	lane	1	12:03:00	177439	8275461	23L	sirgass_2000	10:04:00	24	removed	1	1	0	30.5	19.3	23.2	80.75	775	two_lane	2	DF_001	0	0.0527166	0.323369	0	0.0678651	0.158958	0	0.295698	0.0921026
27	1	2013	march	summer	2	13_03_2013	domestic	Large_mammals	Mammals	Carnivora	Canidae	Canis_familiaris	Cachorro_Domestico	10000	PNB	shoulder	2	12:43:00	170180	8257965	23L	sirgass_2000	12:23:00	48	removed	1	2	0	30.5	19.3	23.2	80.75	8000	two_lane	2	BR_080	0	0.0242375	0.263785	0.263987	0.0694809	0.191073	0	0.146233	0.0313068
28	1	2013	march	summer	2	13_03_2013	wild	small_reptiles	Reptile	Squamata	Amphisbaenidae	Amphisbaena_alba	Cobra_de_duas_cabeças	25	FAL	shoulder	2	14:02:00	182117	8231571	23L	sirgass_2000	13:48:00	48	removed	1	2	0	30.5	19.3	23.2	80.75	2000	two_lane	2	BR_251	0.00202388	0.0180125	0.590771	0	0.13054	0.0829792	0.105242	0.0317749	0
29	1	2013	march	summer	2	13_03_2013	wild	medium_mammals	Mammals	Carnivora	Mustelidae	Galictis_cuja	Furao	1600	FAL	shoulder	2	14:08:00	182925	8231334	23L	sirgass_2000	11:56:00	24	removed	1	1	0	30.5	19.3	23.2	80.75	2000	two_lane	2	BR_251	0.00303521	0.0208418	0.676042	0	0.130514	0.0414812	0.0609065	0.0329826	0
30	1	2013	march	summer	2	13_03_2013	domestic	large_birds	Ave	Galliforme	Phasianidae	Gallus_gallus_domesticus	Galinha	1500	FAL	shoulder	2	14:14:00	183872	8231002	23L	sirgass_2000	13:36:00	48	removed	1	2	0	30.5	19.3	23.2	80.75	2000	two_lane	2	BR_251	0.00141557	0.0204247	0.760364	0	0.118504	0.0228514	0.0145602	0.037816	0
31	2	2013	april	autumn	3	15_04_2013	wild	small_mammals	Mammals	Didelphimorphia	Didelphidae	Didelphis_albiventris	Gamba_ou_Sarue_	900	JBB	shoulder	2	08:23:00	198049	8240766	23L	sirgass_2000	08:09:00	1	removed	1	0	1	27	18.2	21.74	83.25	7000	four_lane	3	DF_001	0.000202061	0.0822388	0.464336	0	0.132148	0.05294	0.116589	0.132754	0
32	2	2013	april	autumn	3	15_04_2013	wild	large_birds	Birds	Falconiforme	Falconidae	NA	Gaviao_	300	PNB	lane	1	09:56:00	171987	8257566	23L	sirgass_2000	09:52:00	1	removed	1	0	1	27	18.2	21.74	83.25	8000	two_lane	2	DF_001	0	0.0200324	0.368677	0.226831	0.0730473	0.213881	0	0.0817483	0.00667746
33	2	2013	april	autumn	3	15_04_2013	wild	small_reptiles	Reptile	Squamata	Dipsadidae	Oxyrhopus_sp	Coral_falsa	80	PNB	shoulder	2	10:32:00	177526	8275459	23L	sirgass_2000	10:03:00	24	removed	1	1	1	27	18.2	21.74	83.25	775	two_lane	2	DF_001	0	0.0546448	0.325238	0	0.0682048	0.155839	0	0.295082	0.0916818
34	2	2013	april	autumn	3	15_04_2013	domestic	Large_mammals	Mammals	Carnivora	Canidae	Canis_familiaris	Cachorro_Domestico	10000	PNB	lane	1	10:36:00	179826	8273893	23L	sirgass_2000	00:00:00	96	remained	0	4	1	27	18.2	21.74	83.25	775	two_lane	2	DF_001	0	0.0507378	0.45664	0	0.0895492	0.105316	0	0.283202	0.00646857
35	2	2013	april	autumn	3	15_04_2013	wild	small_birds	Birds	Columbiforme	Columbidae	Columbina_talpacoti	Rolinha	47	PNB	shoulder	2	11:09:00	192825	8264015	23L	sirgass_2000	10:56:00	1	removed	1	0	1	27	18.2	21.74	83.25	775	two_lane	2	DF_001	0.00101031	0.216811	0.293797	0	0.0547585	0.163669	0.182663	0.039806	0.013336
36	2	2013	april	autumn	3	15_04_2013	wild	small_reptiles	Reptile	Squamata	NA	NA	Lagarto	22	ESECAE	lane	1	11:35:00	218491	8273811	23L	sirgass_2000	11:28:00	1	removed	1	0	1	27	18.2	21.74	83.25	5000	four_lane	3	BR_010_BR_020_BR_030	0	0.0647118	0.534681	0	0.0317492	0.00525784	0.134277	0.20182	0.0109201
37	2	2013	april	autumn	3	15_04_2013	wild	small_birds	Birds	Cuculiforme	Cuculidae	Guira_guira	Anu_branco	100	ESECAE	lane	1	11:48:00	224133	8275265	23L	sirgass_2000	11:44:00	1	removed	1	0	1	27	18.2	21.74	83.25	5000	four_lane	3	BR_010_BR_020_BR_030	0	0.0262945	0.456311	0.019822	0.00950647	0.00161812	0	0.457524	0
38	2	2013	april	autumn	3	15_04_2013	wild	small_reptiles	Reptile	Squamata	Amphisbaenidae	AmphisbaeNA_alba	Cobra_de_duas_cabeças	25	ESECAE	shoulder	2	12:00:00	218431	8273850	23L	sirgass_2000	00:00:00	48	removed	1	2	1	27	18.2	21.74	83.25	5000	four_lane	3	BR_010_BR_020_BR_030	0	0.0688333	0.537344	0	0.0316916	0.00504643	0.134437	0.195196	0.0115059
39	2	2013	april	autumn	3	15_04_2013	wild	small_birds	Birds	Passeriformes	Emberizidae	Volatinia_jacariNA	Tiziu	10	ESECAE	lane	1	12:11:00	212564	8275086	23L	sirgass_2000	12:00:00	24	removed	1	1	1	27	18.2	21.74	83.25	2600	two_lane	2	DF_128	0.0327803	0.229259	0.173209	0	0.0700121	0.00445164	0.118373	0.121206	0.226629
40	2	2013	april	autumn	3	15_04_2013	wild	small_birds	Birds	Passeriformes	Emberizidae	Volatinia_jacariNA	Tiziu	10	ESECAE	lane	1	12:39:00	226814	8282571	23L	sirgass_2000	12:46:00	1	removed	1	0	1	27	18.2	21.74	83.25	33	dirt_road	1	DF_205	0	0.0436137	0.341721	0	0.0313923	0.00599089	0	0.531991	0
41	2	2013	april	autumn	3	16_04_2013	wild	small_birds	Birds	Passeriformes	Emberizidae	Volatinia_jacariNA	Tiziu	10	FAL	lane	1	08:32:00	187868	8231321	23L	sirgass_2000	08:21:00	1	removed	1	0	0	26.5	19	21.38	84	2000	two_lane	2	BR_251	0	0.0384849	0.822767	0	0.0445615	0.0188374	0	0.0688677	0
42	2	2013	april	autumn	3	16_04_2013	wild	Large_reptiles	Reptile	Squamata	Boidae	Epicrates_cenchria	Jiboia_arco_iris	3000	FAL	shoulder	2	08:38:00	184340	8230850	23L	sirgass_2000	08:40:00	24	removed	1	1	0	26.5	19	21.38	84	2000	two_lane	2	BR_251	0.00040347	0.0195683	0.790196	0	0.109139	0.0179544	0.00625378	0.0391366	0
43	2	2013	april	autumn	3	16_04_2013	wild	Large_reptiles	Reptile	Squamata	Viperidae	Bothrops_sp.	Jararaca	250	FAL	lane	1	08:48:00	181954	8231600	23L	sirgass_2000	08:36:00	1	removed	1	0	0	26.5	19	21.38	84	2000	two_lane	2	BR_251	0.0018226	0.018226	0.579384	0	0.122519	0.0951802	0.110571	0.0321993	0
44	2	2013	april	autumn	3	16_04_2013	wild	small_reptiles	Reptile	Squamata	Dipsadidae	Oxyrhopus_guibei	Coral_falsa	80	PNB	shoulder	2	09:56:00	170597	8257843	23L	sirgass_2000	09:54:00	24	removed	1	1	0	26.5	19	21.38	84	8000	two_lane	2	DF_001	0	0.0212594	0.29095	0.269893	0.0686374	0.200243	0	0.110954	0.0285483
45	2	2013	april	autumn	3	16_04_2013	wild	small_birds	Birds	Passeriformes	NA	NA	Passeriforme	25	ESECAE	lane	1	11:28:00	216883	8273942	23L	sirgass_2000	11:17:00	1	removed	1	0	0	26.5	19	21.38	84	5000	four_lane	3	BR_010_BR_020_BR_030	0	0.0959208	0.51252	0	0.0531099	0.00565428	0.193053	0.107633	0.013126
46	2	2013	april	autumn	3	16_04_2013	wild	small_reptiles	Reptile	Squamata	Amphisbaenidae	AmphisbaeNA_alba	Cobra_de_duas_cabeças	25	ESECAE	shoulder	2	11:30:00	218775	8273769	23L	sirgass_2000	00:00:00	72	removed	1	3	0	26.5	19	21.38	84	5000	four_lane	3	BR_010_BR_020_BR_030	0	0.0572064	0.534061	0	0.0319385	0.00525571	0.124116	0.219729	0.00970285
47	2	2013	april	autumn	3	16_04_2013	wild	small_reptiles	Reptile	Squamata	Amphisbaenidae	AmphisbaeNA_alba	Cobra_de_duas_cabeças	25	ESECAE	shoulder	2	11:35:00	219828	8273799	23L	sirgass_2000	11:24:00	1	removed	1	0	0	26.5	19	21.38	84	5000	four_lane	3	BR_010_BR_020_BR_030	0	0.0436893	0.563511	0.00343851	0.0262945	0.00323625	0.0616909	0.276699	0.00161812
48	2	2013	april	autumn	3	16_04_2013	wild	small_birds	Birds	Passeriformes	Mimidae	Mimus_saturninus	Sabia_do_campo	73	ESECAE	shoulder	2	11:46:00	223942	8275136	23L	sirgass_2000	11:33:00	1	removed	1	0	0	26.5	19	21.38	84	5000	four_lane	3	BR_010_BR_020_BR_030	0	0.0272838	0.46443	0.0194018	0.00970089	0.00181892	0	0.448666	0
49	2	2013	april	autumn	3	16_04_2013	wild	small_reptiles	Reptile	Squamata	Amphisbaenidae	AmphisbaeNA_alba	Cobra_de_duas_cabeças	25	ESECAE	shoulder	2	11:57:00	218400	8273853	23L	sirgass_2000	09:50:00	48	removed	1	2	0	26.5	19	21.38	84	5000	four_lane	3	BR_010_BR_020_BR_030	0	0.0712546	0.535729	0	0.0320747	0.00507511	0.135404	0.192448	0.0117743
50	2	2013	april	autumn	3	16_04_2013	wild	Large_reptiles	Reptile	Squamata	Viperidae	Crotalus_durissus	Cascavel	550	ESECAE	shoulder	2	12:04:00	217064	8273957	23L	sirgass_2000	00:00:00	72	removed	1	3	0	26.5	19	21.38	84	5000	four_lane	3	BR_010_BR_020_BR_030	0	0.0939964	0.517485	0	0.0533657	0.00525571	0.185769	0.112998	0.0131393
51	2	2013	april	autumn	3	16_04_2013	wild	large_birds	Birds	Strigiforme	Strigidae	Megascops_choliba	Corujinha_do_Mato	160	ESECAE	shoulder	2	12:05:00	212576	8275129	23L	sirgass_2000	00:00:00	72	removed	1	3	0	26.5	19	21.38	84	2600	two_lane	2	DF_128	0.0328134	0.229086	0.174803	0	0.0698805	0.0042536	0.116467	0.119303	0.229086
52	2	2013	april	autumn	3	16_04_2013	wild	small_birds	Birds	Passeriformes	Emberizidae	Volatinia_jacariNA	Tiziu	10	ESECAE	shoulder	2	12:19:00	212685	8275333	23L	sirgass_2000	12:01:00	1	removed	1	0	0	26.5	19	21.38	84	2600	two_lane	2	DF_128	0.032767	0.228964	0.187905	0	0.0679612	0.00384304	0.111246	0.105583	0.237662
53	2	2013	april	autumn	3	16_04_2013	wild	small_reptiles	Reptile	Squamata	Dipsadidae	Erythrolamprus_aesculapii	Coral_falsa	80	ESECAE	lane	1	12:50:00	228453	8282584	23L	sirgass_2000	00:00:00	72	removed	1	3	0	26.5	19	21.38	84	951	two_lane	2	BR_010_DF_345	0	0.0381661	0.211474	0	0.0182429	0.0146423	0	0.671627	0
54	2	2013	april	autumn	3	17_04_2013	wild	small_reptiles	Reptile	Squamata	Dipsadidae	Philodryas_sp	Cobra_cipo	150	JBB	lane	1	07:56:00	198094	8240377	23L	sirgass_2000	08:01:00	1	removed	1	0	7.3	26.5	16.2	20.32	74.25	7000	four_lane	3	DF_001	0.000202347	0.0829624	0.474707	0	0.131728	0.0509915	0.10866	0.133144	0
55	2	2013	april	autumn	3	17_04_2013	wild	small_birds	Birds	Passeriformes	Emberizidae	Volatinia_jacariNA	Tiziu	10	JBB	lane	1	07:59:00	198049	8240766	23L	sirgass_2000	08:06:00	1	removed	1	0	7.3	26.5	16.2	20.32	74.25	7000	four_lane	3	DF_001	0.000202061	0.0822388	0.464336	0	0.132148	0.05294	0.116589	0.132754	0
56	2	2013	april	autumn	3	17_04_2013	wild	small_birds	Birds	Passeriformes	Emberizidae	Zonotrichia_capensis	Tico_tico	16	JBB	lane	1	08:30:00	185386	8230620	23L	sirgass_2000	08:38:00	1	removed	1	0	7.3	26.5	16.2	20.32	74.25	2000	two_lane	2	BR_251	0.000405022	0.0247064	0.811057	0	0.0897124	0.0159984	0.0036452	0.0384771	0
57	2	2013	april	autumn	3	17_04_2013	wild	small_reptiles	Reptile	Squamata	Amphisbaenidae	AmphisbaeNA_alba	Cobra_de_duas_cabeças	25	PNB	lane	1	09:25:00	173413	8255935	23L	sirgass_2000	09:47:00	1	removed	1	0	7.3	26.5	16.2	20.32	74.25	8000	two_lane	2	DF_001	0	0.0494949	0.320808	0.193737	0.0533333	0.160202	0	0.213333	0
58	2	2013	april	autumn	3	17_04_2013	wild	small_birds	Birds	Cuculiforme	Cuculidae	Crotophaga_ani	Anu_preto	100	PNB	lane	1	09:35:00	169714	8258333	23L	sirgass_2000	09:58:00	1	removed	1	0	7.3	26.5	16.2	20.32	74.25	775	two_lane	2	DF_001	0	0.0308966	0.235864	0.240711	0.0672456	0.175485	0	0.207795	0.0315024
59	2	2013	april	autumn	3	17_04_2013	wild	small_mammals	Mammals	Rodentia	Cricetidae	Cerradomys_scotti	Rato_silvestre	90	PNB	lane	1	10:40:00	192578	8264226	23L	sirgass_2000	11:07:00	1	removed	1	0	7.3	26.5	16.2	20.32	74.25	775	two_lane	2	DF_001	0.00101256	0.192588	0.318955	0	0.0577157	0.172742	0.172742	0.0394897	0.0133657
60	2	2013	april	autumn	3	17_04_2013	wild	small_reptiles	Reptile	Squamata	Amphisbaenidae	AmphisbaeNA_alba	Cobra_de_duas_cabeças	25	ESECAE	shoulder	2	10:47:00	217606	8273917	23L	sirgass_2000	12:17:00	1	removed	1	0	7.3	26.5	16.2	20.32	74.25	5000	four_lane	3	BR_010_BR_020_BR_030	0	0.093605	0.51745	0	0.0522493	0.00625378	0.163607	0.137583	0.0131128
61	3	2013	may	autumn	3	06_05_2013	wild	small_reptiles	Reptile	Squamata	Amphisbaenidae	AmphisbaeNA_alba	Cobra_de_duas_cabeças	25	ESECAE	shoulder	2	08:03:00	218462	8273814	23L	sirgass_2000	00:00:00	72	removed	1	3	0	28.4	14.5	21.84	53	5000	four_lane	3	BR_010_BR_020_BR_030	0	0.0667341	0.533873	0	0.0317492	0.00525784	0.135693	0.199596	0.0111223
62	3	2013	may	autumn	3	06_05_2013	wild	small_reptiles	Reptile	Squamata	Dipsadidae	Oxyrhopus_sp	Coral_falsa	80	PNB	shoulder	2	10:35:00	168837	8263186	23L	sirgass_2000	00:00:00	1	removed	1	0	0	28.4	14.5	21.84	53	775	two_lane	2	DF_001	0	0.0638169	0.300851	0	0.0429498	0.159036	0	0.297002	0.121759
63	3	2013	may	autumn	3	07_05_2013	wild	small_birds	Birds	Passeriformes	NA	NA	Passeriforme	25	ESECAE	lane	1	09:05:00	224149	8275291	23L	sirgass_2000	00:00:00	24	removed	1	1	0	28.4	17.5	22.1	60.25	5000	four_lane	3	BR_010_BR_020_BR_030	0	0.0263158	0.45587	0.0196356	0.00991903	0.00161943	0	0.457895	0
64	3	2013	may	autumn	3	07_05_2013	wild	small_mammals	Mammals	Chiroptera	Phyllostomidae	Glossophaga_sp	Morcego	20	ESECAE	shoulder	2	09:40:00	218247	8281063	23L	sirgass_2000	00:00:00	1	removed	1	0	0	28.4	17.5	22.1	60.25	2600	two_lane	2	DF_128	0.000203169	0.116619	0.471759	0	0.0835026	0.0176757	0	0.261073	0.0178789
65	3	2013	may	autumn	3	07_05_2013	wild	Large_reptiles	Reptile	Squamata	Boidae	Epicrates_cenchria	Jiboia_arco_iris	3000	PNB	lane	1	10:50:00	192354	8264430	23L	sirgass_2000	00:00:00	24	removed	1	1	0	28.4	17.5	22.1	60.25	775	two_lane	2	DF_001	0.000809389	0.171388	0.3448	0	0.057669	0.179887	0.163092	0.0416835	0.0133549
66	3	2013	may	autumn	3	07_05_2013	wild	Large_reptiles	Reptile	Squamata	Boidae	Epicrates_cenchria	Jiboia_arco_iris	3000	PNB	shoulder	2	10:57:00	189849	8266452	23L	sirgass_2000	00:00:00	72	removed	1	3	0	28.4	17.5	22.1	60.25	775	two_lane	2	DF_001	0.000403551	0.0514528	0.553269	0	0.06477	0.193301	0.0300646	0.0744552	0.0258273
67	3	2013	may	autumn	3	07_05_2013	wild	Large_reptiles	Reptile	Squamata	Viperidae	Crotalus_durissus	Cascavel	550	PNB	lane	1	12:19:00	170803	8257775	23L	sirgass_2000	00:00:00	1	removed	1	0	0	28.4	17.5	22.1	60.25	8000	two_lane	2	DF_001	0	0.0213969	0.303593	0.27069	0.0676221	0.202059	0	0.09891	0.0258377
68	3	2013	may	autumn	3	07_05_2013	wild	small_birds	Birds	NA	NA	NA	ave_silvestre	NA	JBB	lane	1	13:33:00	196964	8237294	23L	sirgass_2000	00:00:00	48	removed	1	2	0	28.4	17.5	22.1	60.25	7000	four_lane	3	DF_001	0.000202593	0.0921799	0.549635	0	0.0601702	0.0131686	0.0790113	0.176864	0.00911669
69	3	2013	may	autumn	3	08_05_2013	wild	small_reptiles	Reptile	Squamata	Dipsadidae	Philodryas_sp	Cobra_cipo	150	FAL	lane	1	11:57:00	180357	8231410	23L	sirgass_2000	00:00:00	48	removed	1	2	0	26.6	15	19.92	66.5	2000	two_lane	2	BR_251	0.000607656	0.0226858	0.470326	0	0.0905408	0.143204	0.11667	0.106542	0
70	3	2013	may	autumn	3	08_05_2013	wild	small_birds	Birds	Passeriformes	Melanopareiidae	Melanopareia_torquata	tapaculo_de_colarinho	16	FAL	shoulder	2	12:06:00	183860	8231004	23L	sirgass_2000	00:00:00	1	removed	1	0	0	26.6	15	19.92	66.5	2000	two_lane	2	BR_251	0.00161976	0.020247	0.75987	0	0.118647	0.0230816	0.0145778	0.0378619	0
71	3	2013	may	autumn	3	08_05_2013	wild	small_birds	Birds	Passeriformes	Emberizidae	Volatinia_jacariNA	Tiziu	10	FAL	lane	1	12:31:00	197062	8237487	23L	sirgass_2000	00:00:00	1	removed	1	0	0	26.6	15	19.92	66.5	7000	four_lane	3	DF_001	0.000202347	0.087414	0.554431	0	0.0625253	0.0129502	0.0726427	0.18272	0.00748685
72	4	2013	june	autumn	3	17_06_2013	domestic	Large_mammals	Mammals	Carnivora	Canidae	Canis_familiaris	Cachorro_Domestico	10000	ESECAE	shoulder	2	08:12:00	223800	8275149	23L	sirgass_2000	08:14:00	1	removed	1	0	0	27.4	14.7	21.18	61	5000	four_lane	3	BR_010_BR_020_BR_030	0	0.0255734	0.472904	0.0184697	0.0103511	0.00182667	0	0.442257	0
73	4	2013	june	autumn	3	17_06_2013	domestic	medium_mammals	Mammals	Carnivora	Felidae	Felis_catus	Gato_Domestico	5000	ESECAE	shoulder	2	08:28:00	213640	8274030	23L	sirgass_2000	00:00:00	96	remained	0	4	0	27.4	14.7	21.18	61	5000	four_lane	3	BR_010_BR_020_BR_030	0.0328002	0.214821	0.238712	0	0.0686374	0.00587163	0.214821	0.126341	0.0730917
74	4	2013	june	autumn	3	17_06_2013	wild	small_mammals	Mammals	Primates	Cebidae	Callithrix_penicillata	Sagui	400	ESECAE	lane	1	08:51:00	217308	8280075	23L	sirgass_2000	00:00:00	24	removed	1	1	0	27.4	14.7	21.18	61	2600	two_lane	2	DF_128	0	0.11665	0.487386	0	0.067003	0.0173562	0	0.238345	0.0603431
75	4	2013	june	autumn	3	17_06_2013	domestic	medium_mammals	Mammals	Carnivora	Felidae	Felis_catus	Gato_Domestico	5000	PNB	lane	1	10:11:00	184507	8270357	23L	sirgass_2000	00:00:00	96	remained	0	4	0	27.4	14.7	21.18	61	775	two_lane	2	DF_001	0.000203211	0.0103637	0.416988	0	0.0904288	0.144483	0	0.299329	0.0314977
76	4	2013	june	autumn	3	17_06_2013	wild	large_birds	Birds	Strigiforme	Strigidae	NA	Coruja	200	PNB	lane	1	10:13:00	184147	8270624	23L	sirgass_2000	00:00:00	96	remained	0	4	0	27.4	14.7	21.18	61	775	two_lane	2	DF_001	0	0.00810866	0.424488	0	0.092236	0.146564	0	0.302453	0.0194608
77	4	2013	june	autumn	3	17_06_2013	domestic	small_birds	Ave	Passeriformes	Passeridae	Passer_domesticus	Pardal	26	PNB	lane	1	10:22:00	183092	8271403	23L	sirgass_2000	10:04:00	1	removed	1	0	0	27.4	14.7	21.18	61	775	two_lane	2	DF_001	0	0.0226446	0.452891	0	0.0988678	0.137485	0	0.281642	0
78	4	2013	june	autumn	3	17_06_2013	wild	large_birds	Birds	Strigiforme	Strigidae	NA	Coruja	200	PNB	lane	1	10:54:00	168722	8264193	23L	sirgass_2000	10:47:00	1	removed	1	0	0	27.4	14.7	21.18	61	775	two_lane	2	DF_001	0	0.0608204	0.287533	0	0.0454637	0.147302	0	0.339665	0.104061
79	4	2013	june	autumn	3	17_06_2013	wild	medium_mammals	Mammals	Carnivora	Mustelidae	Galictis_cuja	Furao	1600	PNB	shoulder	2	11:12:00	173568	8255598	23L	sirgass_2000	00:00:00	96	remained	0	4	0	27.4	14.7	21.18	61	8000	two_lane	2	DF_001	0	0.0626013	0.295786	0.189425	0.0526742	0.153566	0.00202593	0.229943	0.000810373
80	4	2013	june	autumn	3	18_06_2013	domestic	Large_mammals	Mammals	Carnivora	Canidae	Canis_familiaris	Cachorro_Domestico	10000	ESECAE	shoulder	2	08:05:00	219448	8273795	23L	sirgass_2000	00:00:00	72	removed	1	3	0	27.2	15.8	21.26	56.5	5000	four_lane	3	BR_010_BR_020_BR_030	0	0.0479563	0.551194	0.000202347	0.0281263	0.00445164	0.0831647	0.257588	0.00789154
81	4	2013	june	autumn	3	18_06_2013	wild	large_birds	Birds	Accipitriformes	Accipitridae	Rupornis_magnirostris	Gaviao_carijo	300	PNB	shoulder	2	10:54:00	173485	8255888	23L	sirgass_2000	00:00:00	72	removed	1	3	0	27.2	15.8	21.26	56.5	8000	two_lane	2	DF_001	0	0.0516822	0.320632	0.188488	0.0531009	0.157681	0	0.219295	0
82	4	2013	june	autumn	3	18_06_2013	wild	small_reptiles	Reptile	Squamata	Teiidae	Ameiva_ameiva	Lagarto	22	PNB	lane	1	10:54:00	173485	8255888	23L	sirgass_2000	00:00:00	1	removed	1	0	0	27.2	15.8	21.26	56.5	8000	two_lane	2	DF_001	0	0.0516822	0.320632	0.188488	0.0531009	0.157681	0	0.219295	0
83	4	2013	june	autumn	3	18_06_2013	wild	small_birds	Birds	Passeriformes	Thraupidae	Cypsnagra_hirundinacea	Bandoleta	28	IBGE	shoulder	2	11:58:00	192476	8233373	23L	sirgass_2000	00:00:00	1	removed	1	0	0	27.2	15.8	21.26	56.5	2000	two_lane	2	BR_251	0	0.0698947	0.436588	0	0.0658428	0.060778	0.0103323	0.338533	0.0089141
84	4	2013	june	autumn	3	19_06_2013	wild	small_birds	Birds	Galbuliforme	Bucconidae	Nystalus_chacuru	Joao_Bobo	64	PNB	shoulder	2	10:42:00	173556	8254027	23L	sirgass_2000	00:00:00	24	removed	1	1	0	26.4	14.8	20.64	55.5	8000	two_lane	2	DF_001	0	0.0858126	0.178911	0.195709	0.0437158	0.0955272	0.119611	0.252985	0.00485732
85	4	2013	june	autumn	3	19_06_2013	wild	small_birds	Birds	Passeriformes	Emberizidae	Ammodramus_humeralis	Tico_tico_do_campo	15	IBGE	shoulder	2	11:39:00	192727	8233597	23L	sirgass_2000	00:00:00	1	removed	1	0	0	26.4	14.8	20.64	55.5	2000	two_lane	2	BR_251	0	0.0695934	0.427878	0	0.0655472	0.062108	0.0196237	0.33684	0.00890148
86	5	2013	july	winter	4	29_07_2013	wild	small_birds	Birds	Passeriformes	Emberizidae	Zonotrichia_capensis	Tico_Tico	16	JBB	shoulder	2	08:46:00	194732	8235333	23L	sirgass_2000	08:35:00	1	removed	1	0	0	28	13.2	20.6	39	2000	two_lane	2	DF_001	0	0.0719919	0.505157	0	0.0361982	0.0339737	0.107381	0.221638	0.00889788
87	5	2013	july	winter	4	29_07_2013	domestic	medium_mammals	Mammals	Carnivora	Felidae	Felis_catus	Gato_Domestico	5000	PNB	shoulder	2	10:27:00	180504	8273377	23L	sirgass_2000	00:00:00	96	remained	0	4	0	28	13.2	20.6	39	775	two_lane	2	DF_001	0	0.0407587	0.483454	0	0.0990718	0.104923	0	0.264326	0.000201776
88	5	2013	july	winter	4	29_07_2013	domestic	Large_mammals	Mammals	Carnivora	Canidae	Canis_familiaris	Cachorro_Domestico	10000	PNB	lane	1	10:37:00	182099	8272163	23L	sirgass_2000	00:00:00	48	removed	1	2	0	28	13.2	20.6	39	775	two_lane	2	DF_001	0	0.0321797	0.479458	0	0.0947177	0.131148	0	0.255616	0
89	5	2013	july	winter	4	29_07_2013	wild	small_mammals	Mammals	Didelphimorphia	Didelphidae	Didelphis_albiventris	Gamba_ou_Sarue_	900	ESECAE	shoulder	2	11:25:00	215655	8274018	23L	sirgass_2000	00:00:00	96	remained	0	4	0	28	13.2	20.6	39	5000	four_lane	3	BR_010_BR_020_BR_030	0	0.131728	0.414407	0	0.0544314	0.00607042	0.235127	0.109065	0.0250911
90	5	2013	july	winter	4	29_07_2013	domestic	Large_mammals	Mammals	Carnivora	Canidae	Canis_familiaris	Cachorro_Domestico	10000	ESECAE	shoulder	2	11:29:00	217160	8273918	23L	sirgass_2000	00:00:00	96	remained	0	4	0	28	13.2	20.6	39	5000	four_lane	3	BR_010_BR_020_BR_030	0	0.0939015	0.514136	0	0.0535137	0.00545234	0.183158	0.119346	0.013126
91	5	2013	july	winter	4	30_07_2013	domestic	Large_mammals	Mammals	Carnivora	Canidae	Canis_familiaris	Cachorro_Domestico	10000	ESECAE	shoulder	2	12:00:00	213823	8274043	23L	sirgass_2000	00:00:00	1	removed	1	0	0	27.1	13.1	20.46	41	5000	four_lane	3	BR_010_BR_020_BR_030	0.0327935	0.2083	0.255061	0	0.0674089	0.00587045	0.222267	0.119636	0.0639676
92	5	2013	july	winter	4	30_07_2013	wild	large_birds	Birds	Strigiforme	Strigidae	NA	Coruja	200	ESECAE	shoulder	2	12:09:00	217374	8274012	23L	sirgass_2000	00:00:00	72	removed	1	3	0	27.1	13.1	20.46	41	5000	four_lane	3	BR_010_BR_020_BR_030	0	0.0937627	0.528554	0	0.0530579	0.00607533	0.168489	0.120697	0.0131632
93	5	2013	july	winter	4	30_07_2013	wild	large_birds	Birds	Strigiforme	Strigidae	Megascops_choliba	Corujinha_do_Mato	160	ESECAE	shoulder	2	12:42:00	212811	8275464	23L	sirgass_2000	00:00:00	72	removed	1	3	0	27.1	13.1	20.46	41	2600	two_lane	2	DF_128	0.0328201	0.229133	0.200365	0	0.0660454	0.00405186	0.106969	0.0986629	0.237844
[truncated: 497 more rows]

## Sheet: Detectability data
survey	animal_found	Ano_	Mes	Data	class	family	species	commom_name	body_mass	site	X	y	utm_zone	datum	road	position	time_of_record	road_type
[truncated: 120 more rows]
